# Supplementary material for: Distinctive Metabolomics Patterns Associated With Insulin Resistance and Type 2 Diabetes Mellitus
Source: PubMed Central journal article supplement (PMC7768025; doi:10.3389/fmolb.2020.609806), 2020-12-14
Supplement: Presentation_1.pdf [file Presentation_1.pdf]

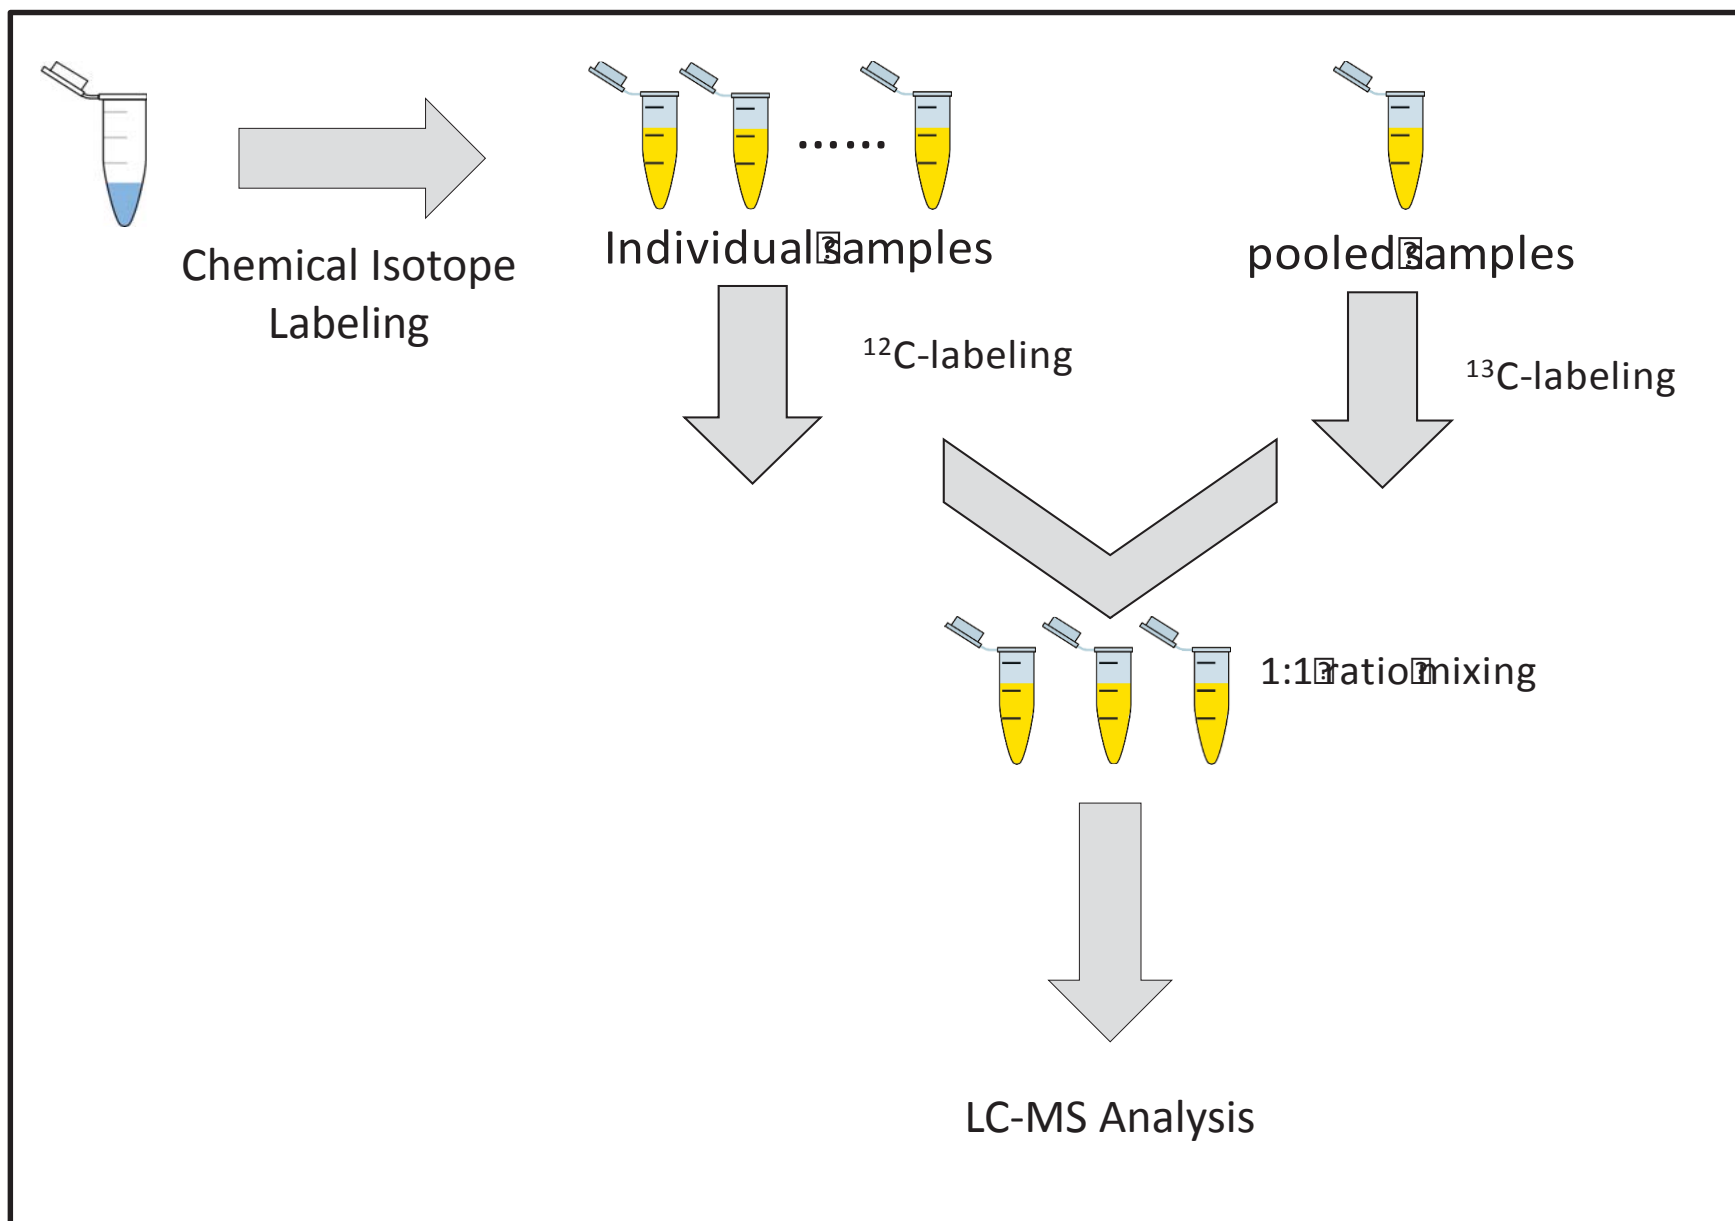

**Figure S1:** Schematic diagram of overall workflow of chemical isotope labeling.

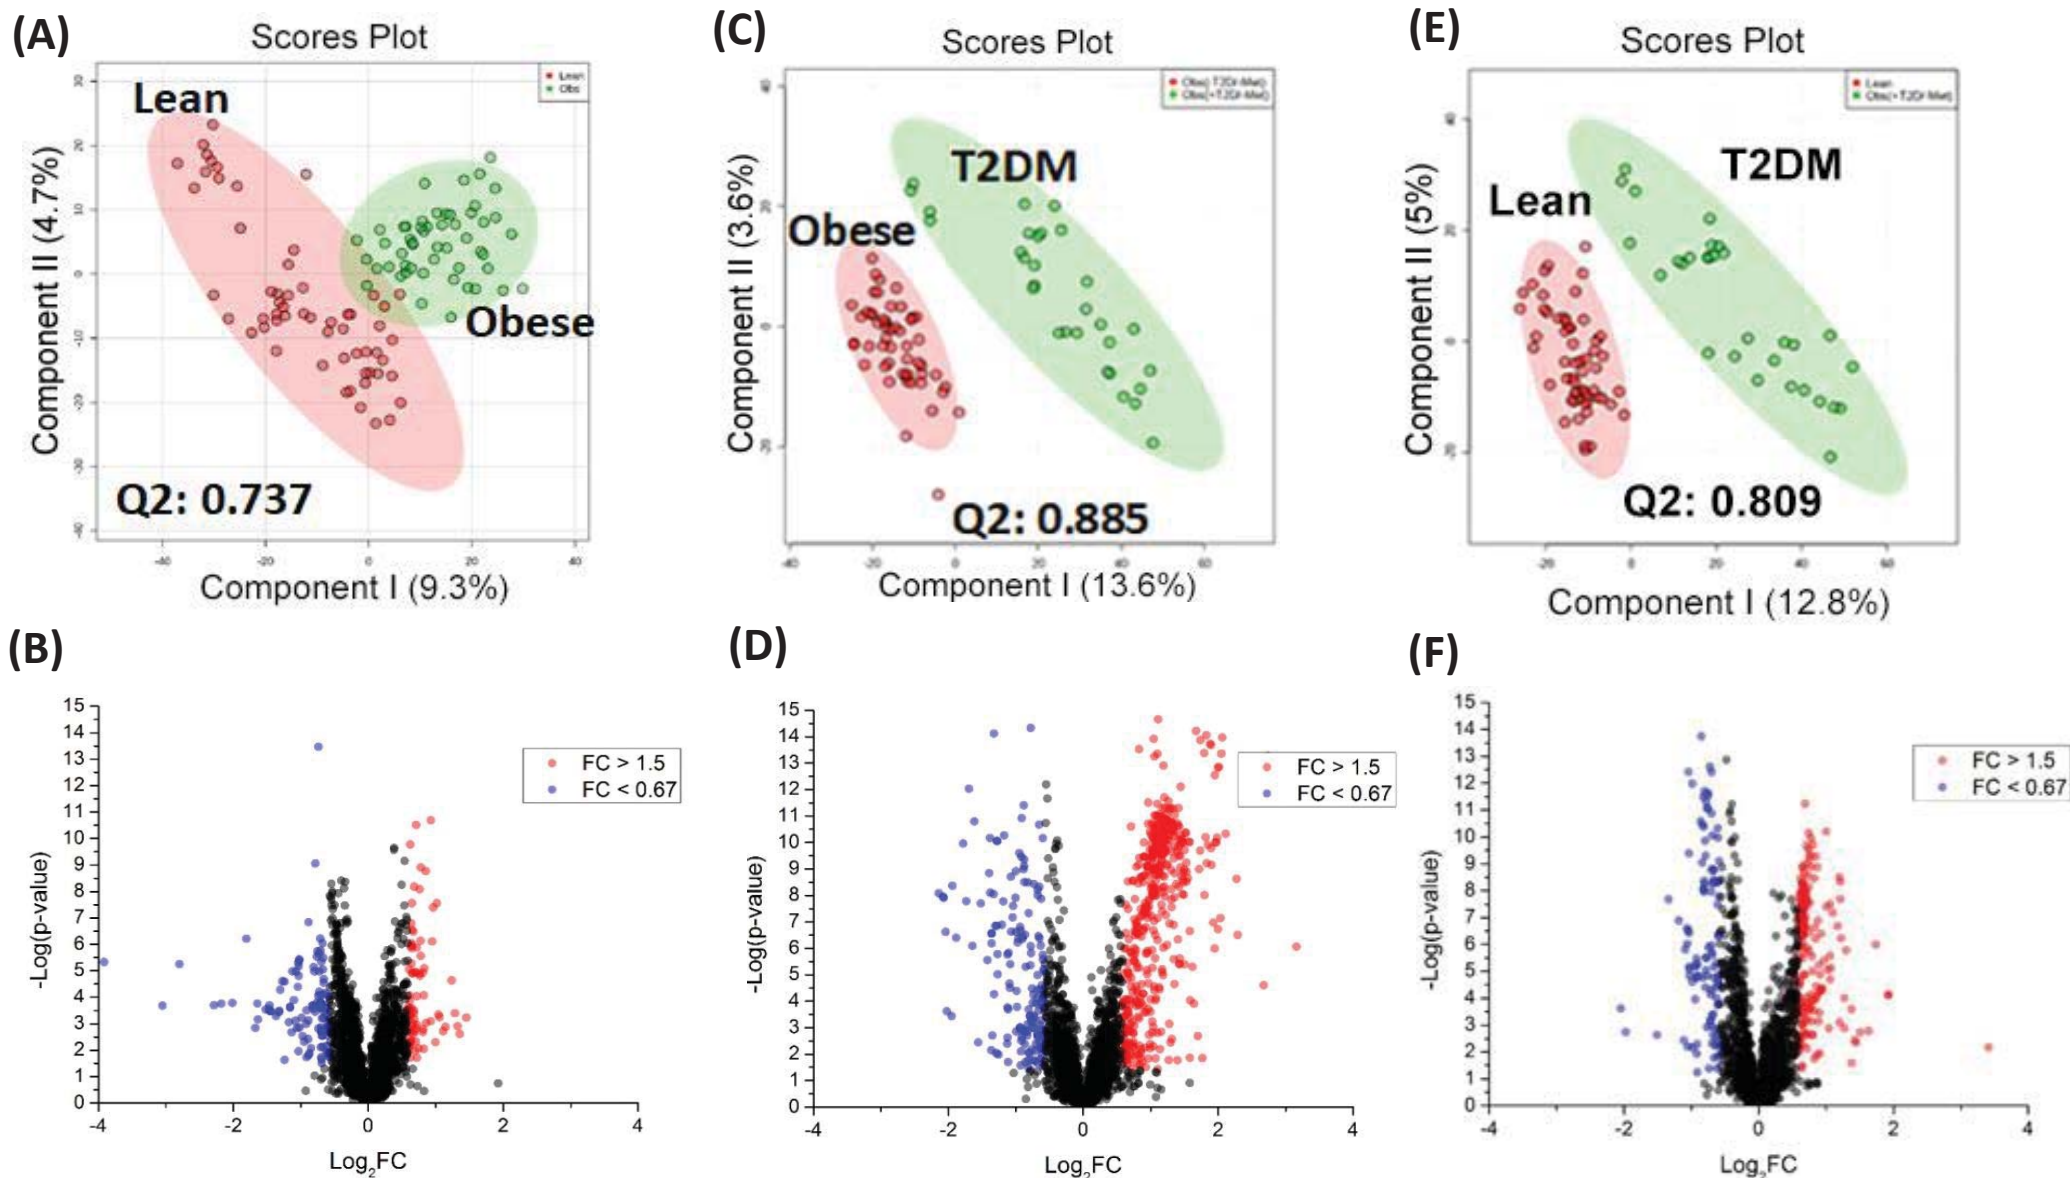

**Figure S2:** Study groups metabolomic profiles were evaluated using PLS-DA analysis. **(A)** Clusters of lean and obese subjects were separated (Q<sub>2</sub>=0.737, R<sup>2</sup>=0.972). **(B)** Volcano plot of obese versus lean group. 78 metabolites were up- and 111 were down-regulated in obese group with fold change and FDR adjusted p-value at the cut-off 1.5 (or 0.67) and 0.05, respectively. **(C)** Clusters of Obese and T2DM groups were separated (Q<sub>2</sub>=0.885, R<sup>2</sup>=0.985). **(D)** Volcano plot of T2DM versus obese groups. 459 metabolites were up- and 166 were down-regulated in T2DM group with fold change and FDR adjusted p-value at the cut-off 1.5 (or 0.67), and 0.038, respectively. **(E)** Clusters of lean and T2DM groups were separated (Q<sub>2</sub>=0.809, R<sup>2</sup>=0.977). **(F)** Volcano plot of lean versus T2DM groups. 189 metabolites were up- and 117 were down-regulated in T2DM group with fold change and FDR adjusted p-value at the cut-off 1.5 (or 0.67), and 0.068, respectively.

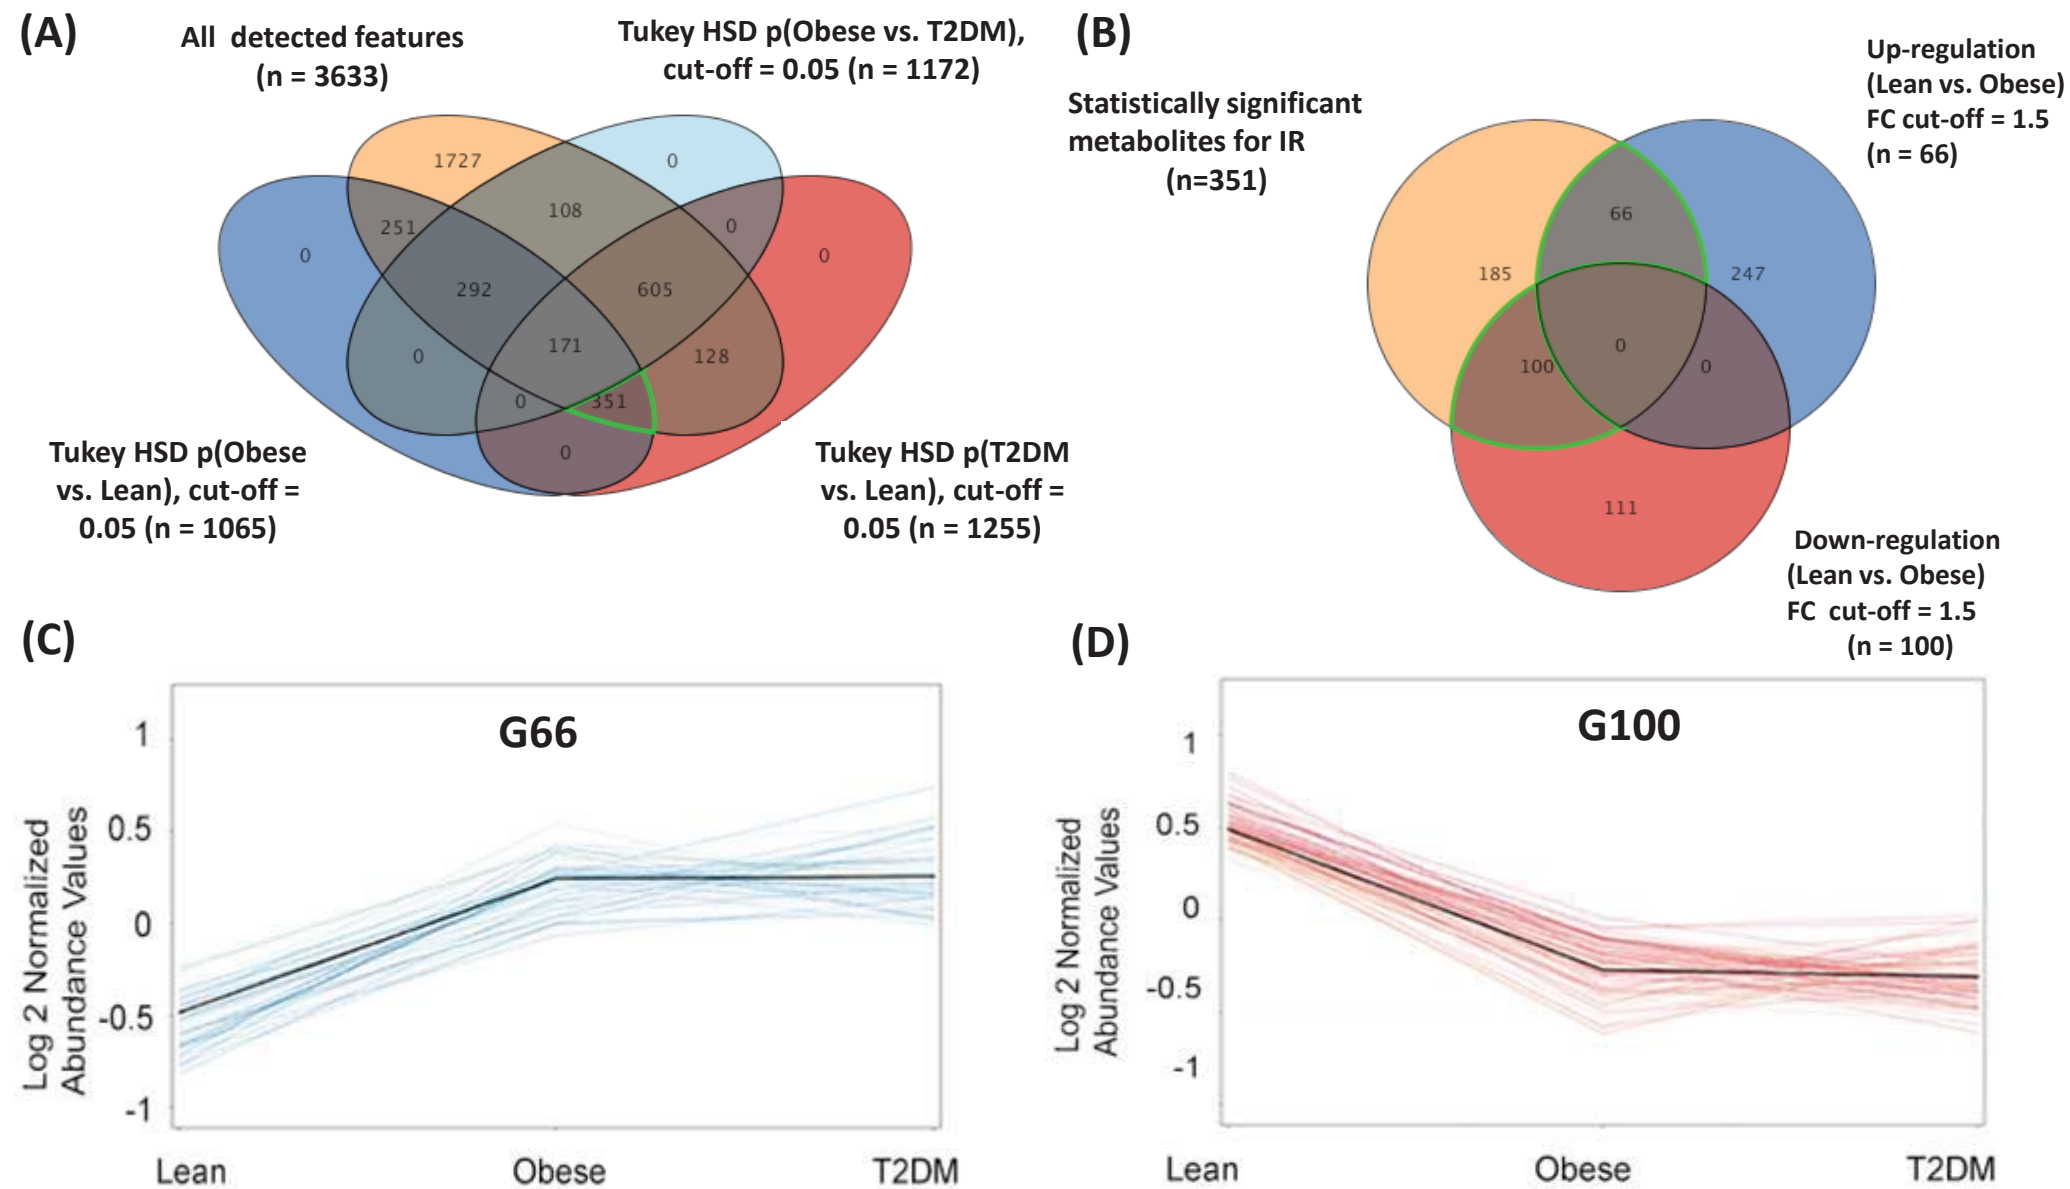

**Figure S3: IR model based on both identified and unidentified features detected by the metabolomics platform. (A)** Among the 3633 detected features, only 351 (G351) metabolites had an IR profile (statistical significance between lean and obese, and lean and T2D, and insignificance between obese and T2D (FDR-Corrected p-value <0.05)). **(B)** Fold change analysis separates the group of 351 significant metabolites into up- and down-regulated features in lean compared to obese and T2DM (66 and 100 metabolites, respectively) with 1.5 as fold change cutoff. **(C)** Representative profile of the up-regulated (G66) and **(D)** down regulated metabolites (G100).

**(A)**

IR metabolic panel  
(upregulated in Obese  
and T2DM) G18

Entities similar to  
LDL-C, Pearson r  
(0.95-1) (n = 42)

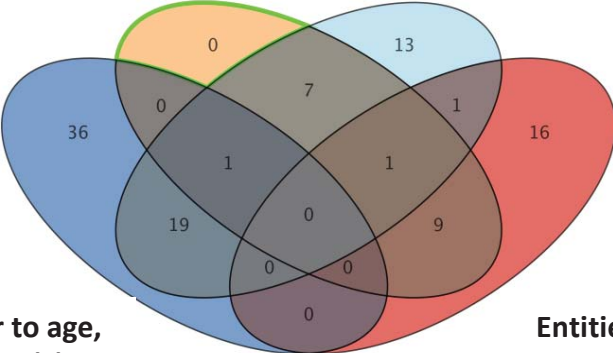

Entities similar to age,  
Pearson r (0.95-1) (n =  
56)

Entities similar to  
BMI, Pearson r  
(0.95-1) (n = 27)

**(B)**

IR metabolic panel  
(Down regulated in  
Obese and T2DM) G9

Entities similar to  
LDL-C, Pearson r  
(0.95-1) (n = 42)

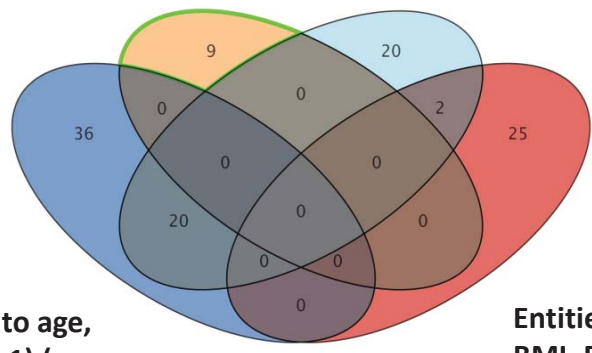

Entities similar to age,  
Pearson r (0.95-1) (n =  
56)

Entities similar to  
BMI, Pearson r  
(0.95-1) (n = 27)

**Figure S4:** BMI-, LDL-C-, and age- independent metabolic pattern for **(A)** IR upregulated metabolic panel (G18), and **(B)** IR down regulated metabolic panel (G9).

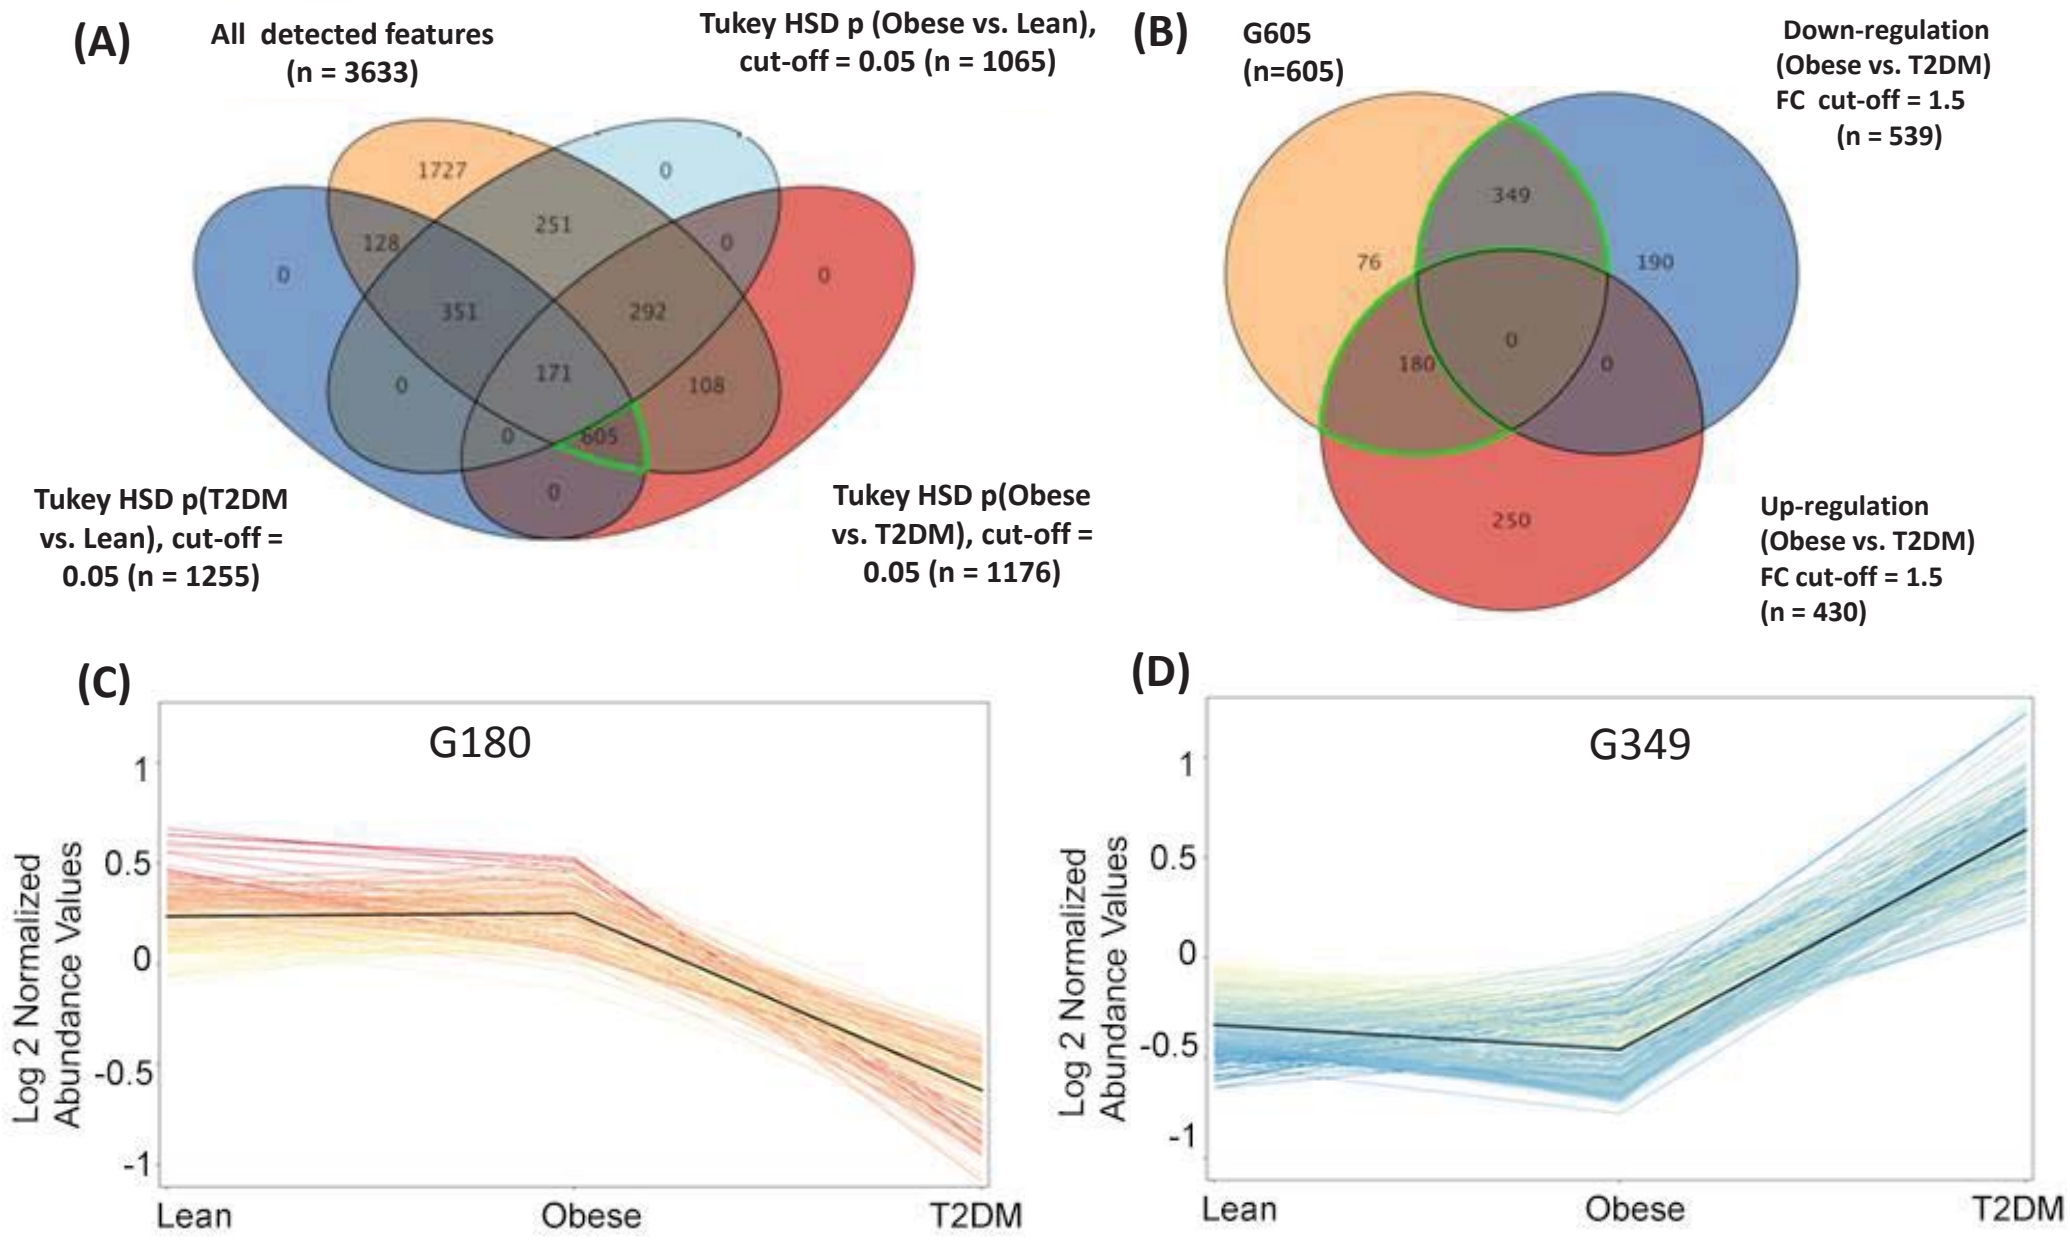

**Figure S5: T2DM metabolic model based on both identified and unidentified features detected by this metabolomics platform. (A)** Among the 3633 detected features, only 605 metabolites were considered a pattern for T2DM. Statistical significance between lean and T2DM, and obese and T2DM, and insignificance between lean and obese (FDR-Corrected p-value <0.05)); **(B)** Fold change analysis with cutoff 1.5 separates these significant metabolites into up- and down-regulated groups when T2DM compared to obese (349 and 180 metabolites, respectively); **(C)** Representative profile of the down-regulated metabolites (G180) and **(D)** up-regulated metabolites (G349).

(A)

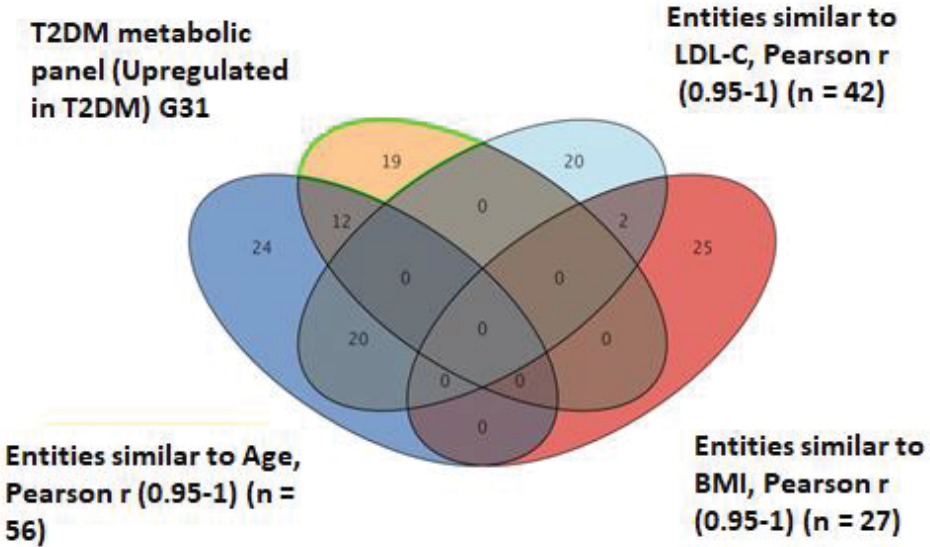

(B)

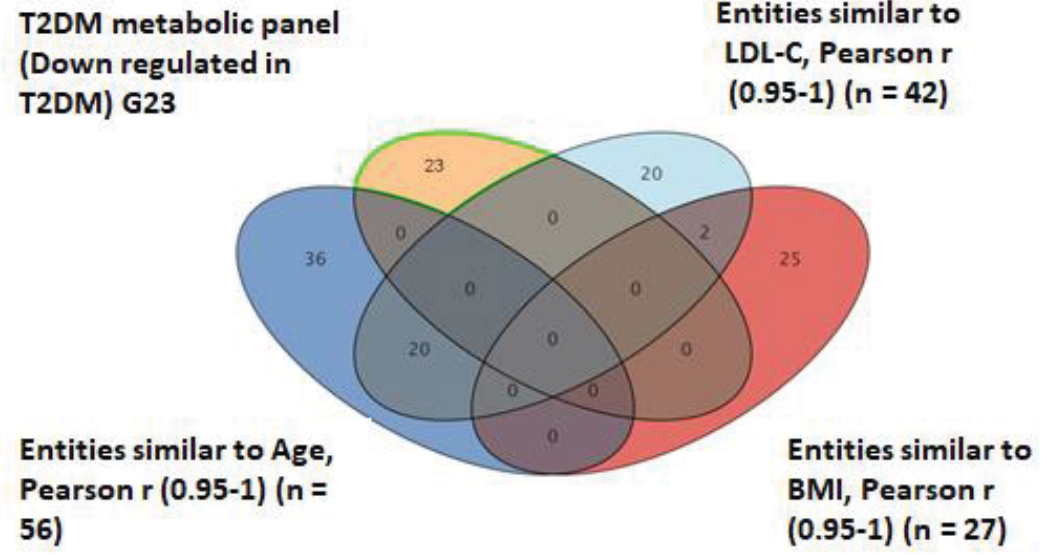

**Figure S6:** BMI-, LDL-C-, and age- independent metabolic pattern for (A) T2DM upregulated metabolic panel (G31), and (B) T2DM down regulated metabolic panel (G23).

**(A)**

IR metabolic panel (Down regulated in Obese and T2DM) Age, BMI, and LDL-C-independent G9

T2DM metabolic panel (Upregulated in T2DM (G31)) Age, BMI, and LDL-C-independent G19

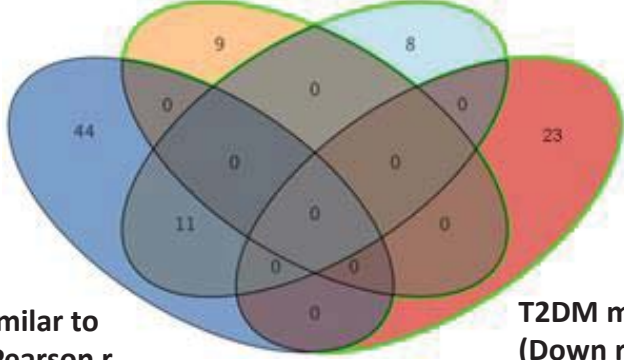

Entities similar to Glucose, Pearson r (0.95-1) (n = 55)

T2DM metabolic panel (Down regulated in T2DM) Age, BMI, and LDL-C-independent G23

**(B)**

IR metabolic panel (Down regulated in Obese and T2DM) Age, BMI, and LDL-C-independent G9

T2DM metabolic panel (Upregulated in T2DM (G31)) Age, BMI, and LDL-C-independent G19

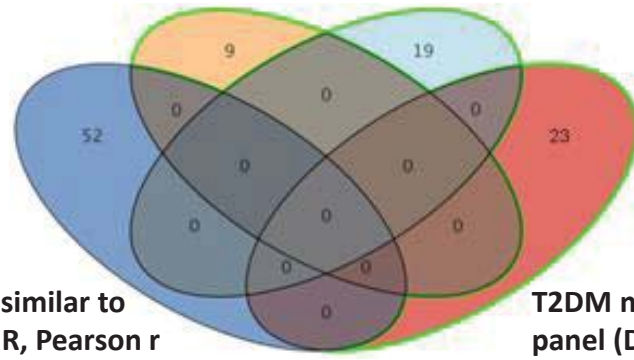

Entities similar to HOMA-IR, Pearson r (0.95-1) (n = 52)

T2DM metabolic panel (Down regulated in T2DM) Age, BMI, and LDL-C-independent G23

**(C)**

IR metabolic panel (Down regulated in Obese and T2DM) Age, BMI, and LDL-C-independent G9

T2DM metabolic panel (Upregulated in T2DM (G31)) Age, BMI, and LDL-C-independent G19

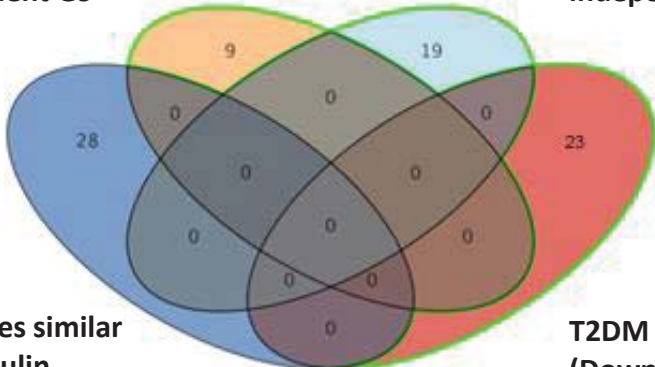

Entities similar to Insulin, Pearson r (0.95-1) (n = 28)

T2DM metabolic panel (Down regulated in T2DM) Age, BMI, and LDL-C-independent G23

**Figure S7:** IR and T2DM metabolic panels, after excluding age, BMI, and LDL-C related metabolites, correlated to (A) Glucose, (B) HOMA-IR, (C) Insulin.

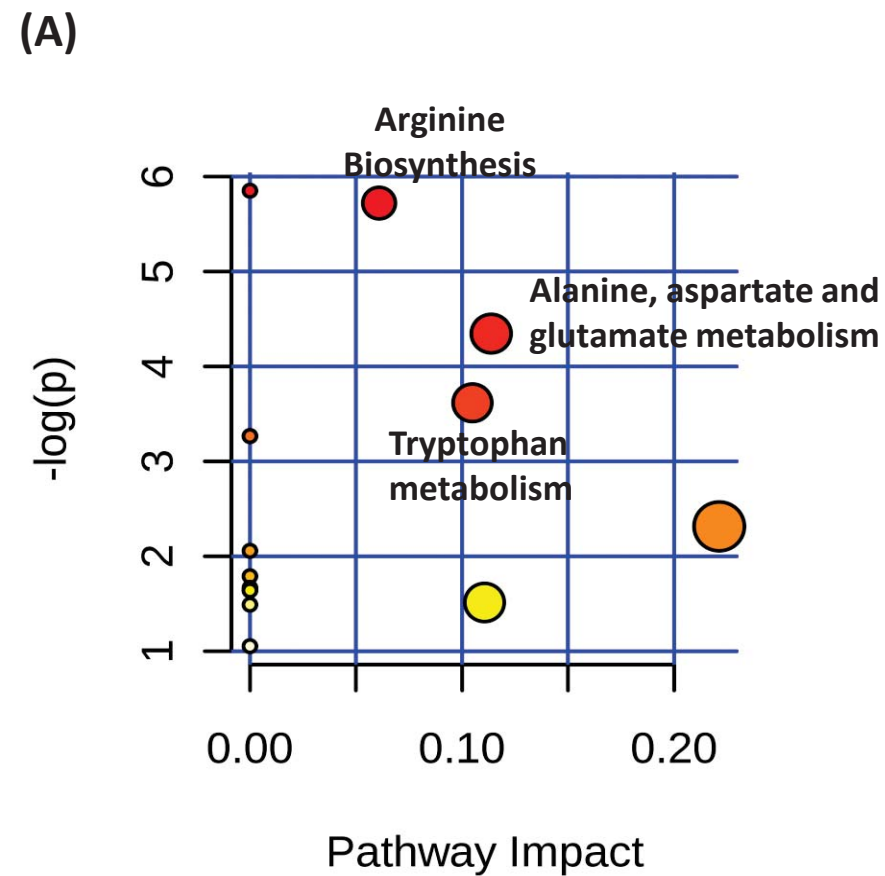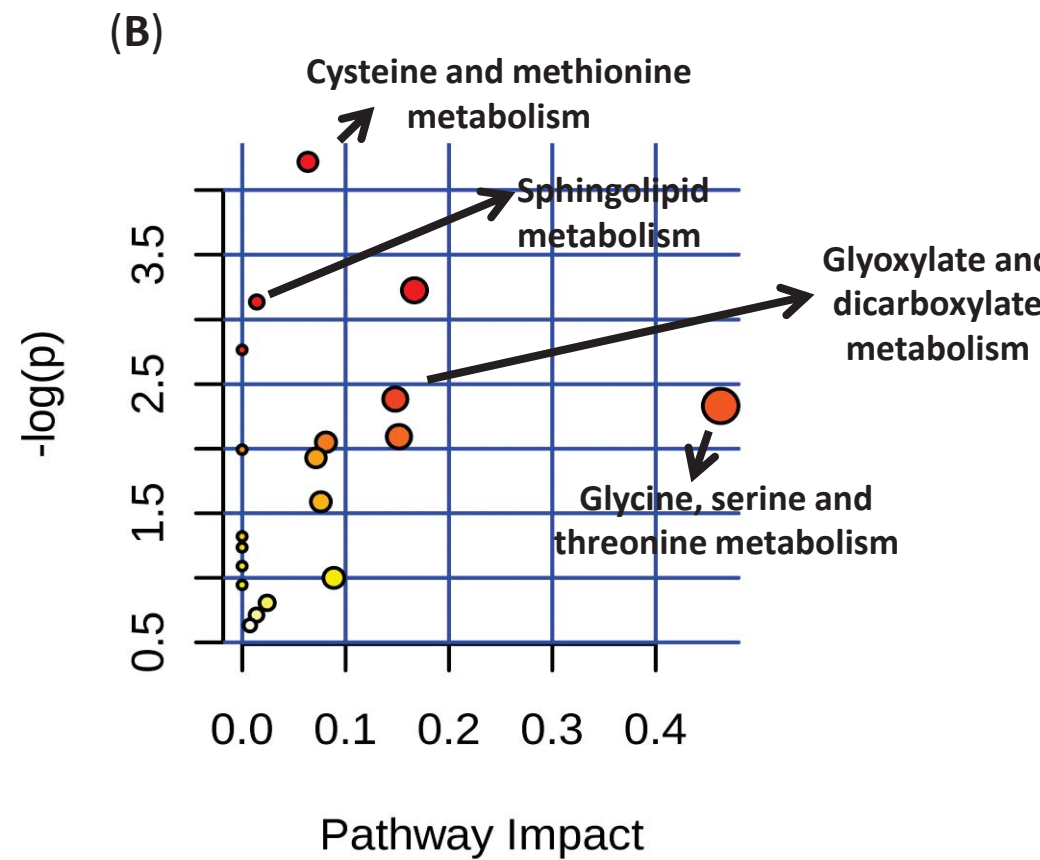

**Figure S8:** Pathway impact plots that display the most important pathways involved in the metabolic changes due to **(A)** IR and **(B)** T2DM mechanisms.



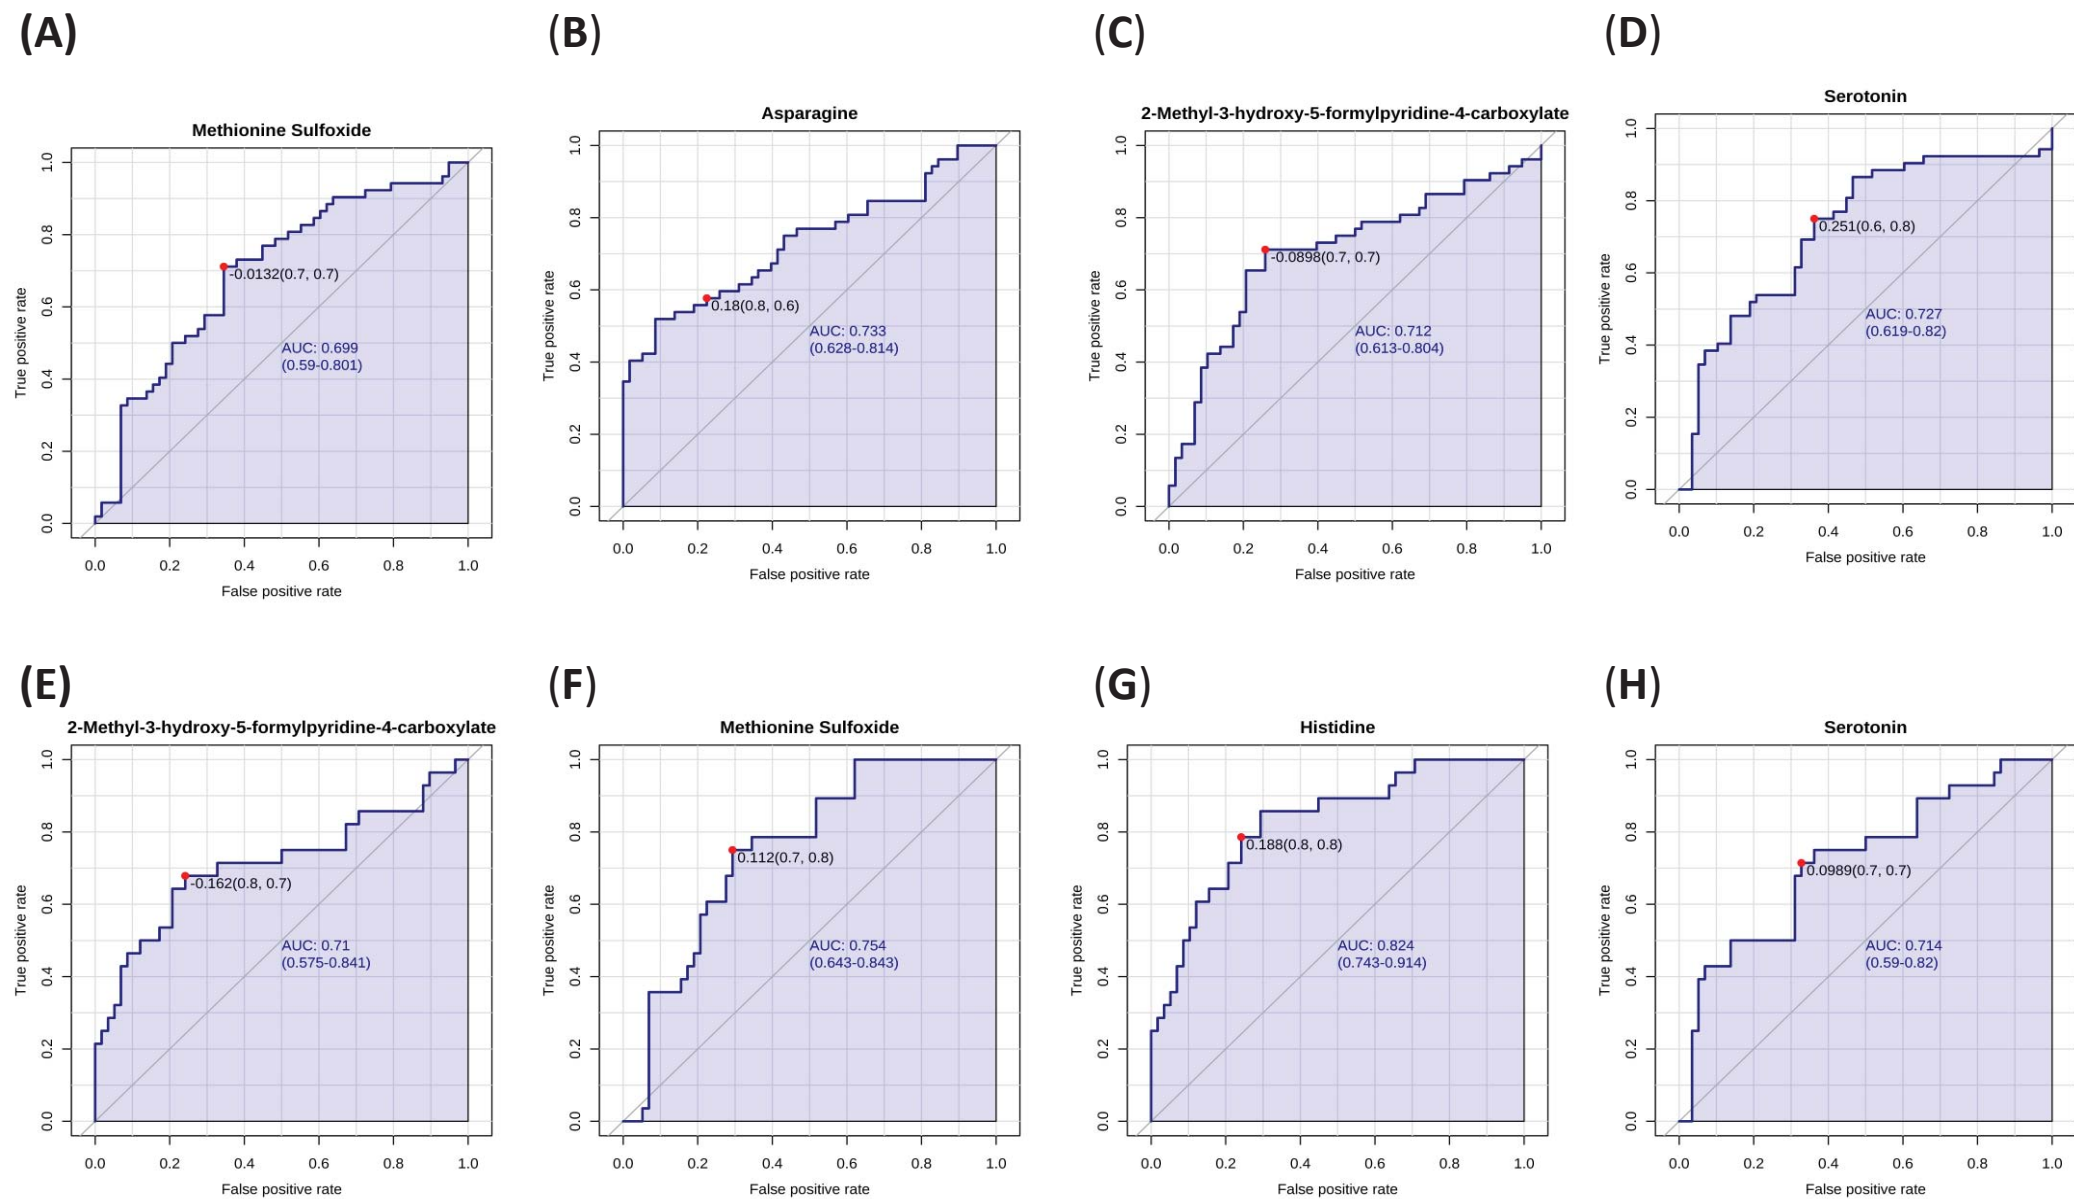

**Figure S9:** Representative individual ROC curves for IR potential metabolic biomarkers predicted in lean compared to obese group **(A)** Methionine sulfoxide, **(B)** Asparagine, **(C)** 2-methyl-3-hydroxy-5-formylpyridine-4-carboxylate, and **(D)** Serotonin, and in Lean compared to T2DM **(E)** 2-methyl-3-hydroxy-5-formylpyridine-4-carboxylate, **(F)** Methionine sulfoxide, **(G)** Histidine, and **(H)** Serotonin.

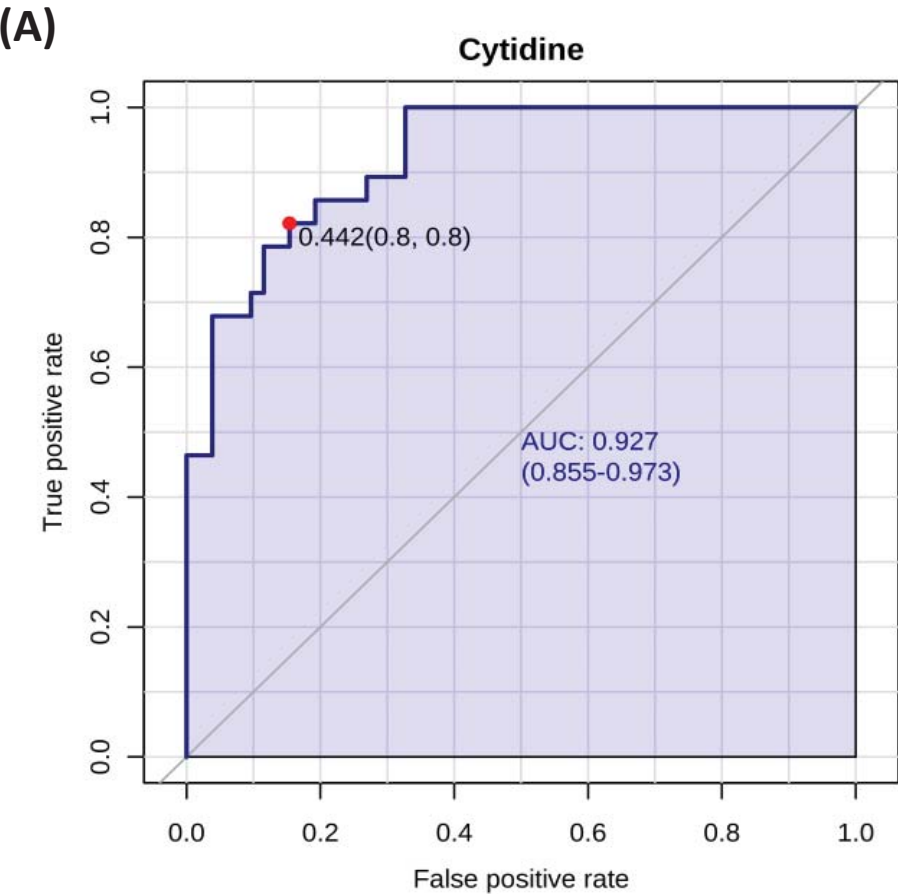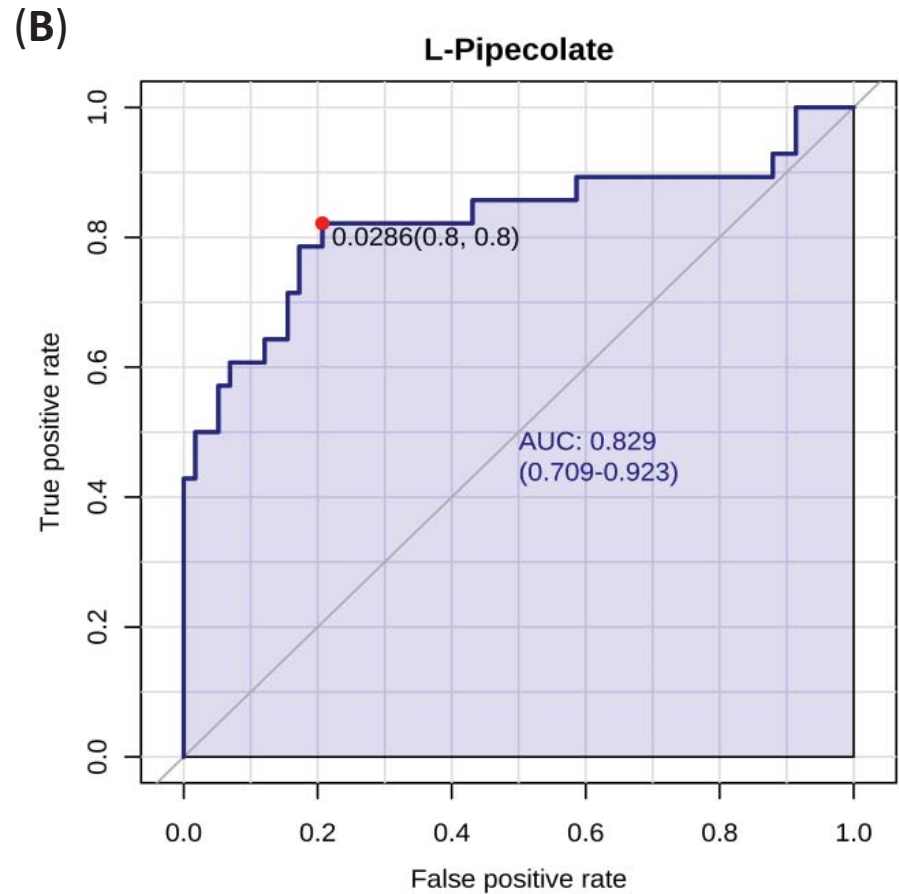

**Figure S10:** : Representative individual ROC curves for T2DM potential metabolic biomarkers predicted in lean compared to T2DM and Obese compared to T2DM (A) Cytidine, and (B) Pipecolate.
