# Supplementary material for: Distinctive Metabolomics Patterns Associated With Insulin Resistance and Type 2 Diabetes Mellitus
Source: Front Mol Biosci. 2020 Dec 14;7:609806. doi: 10.3389/fmolb.2020.609806 (PMC7768025; doi:10.3389/fmolb.2020.609806)
Supplement: Supplementary file 4 [file Data_Sheet_4.CSV]

No	rt	mz_light	mz_heavy	mz	distance	int_heavy	nCharge	nTag	28_1	28_2	30_1	30_2	38_1	38_2	40_1	40_2	42_1	42_2	43_1	43_2	44_1	44_2	45_1	45_2	46_1	46_2	48_1	48_2	49_1	49_2	51_1	51_2	52_1	52_2	53_1	53_2	55_1	55_2	56_1	56_2	58_1	58_2	61_1	61_2	87_1	87_2	88_1	88_2	89_1
									1	1	1	1	1	1	1	1	1	1	1	1	1	1	1	1	1	1	1	1	1	1	1	1	1	1	1	1	1	1	1	1	1	1	1	1	1	1	1	1	1
1	123.03	835.8281197	839.8393597	368.7187797	4.01123998	137886	1	2	0.178	0.272	0.178	0.210281485	0.254	0.210281485	0.210281485	0.210281485	0.210281485	0.210281485	0.210281485	0.237	0.210281485	0.210281485	0.248	0.218	0.214	0.210281485	0.210281485	0.210281485	0.166	0.210281485	0.232	0.210281485	0.262	0.185	0.218	0.219	0.210281485	0.244	0.210281485	0.269	0.148	0.152	0.251	0.183	0.213	0.210281485	0.182	0.243	0.231
2	123.035	833.824041	835.8298309	599.765721	2.00578987	16444	1	1	1.857	1.27159483	1.416	1.481013334	1.189	1.481013334	1.481013334	1.481013334	1.481013334	1.481013334	1.481013334	1.984586324	1.481013334	1.481013334	1.335	1.233	1.188	1.481013334	1.481013334	1.481013334	2.511	1.481013334	1.543	1.481013334	1.214	1.618046877	1.314	1.94044541	1.481013334	1.538	1.481013334	1.102	1.654	2.714	1.477	1.522	1.115	1.481013334	1.332	1.948	1.197
3	123.1793333	495.9837696	499.9940076	28.87442961	4.010238039	26493.33333	1	2	0.957	0.902	0.746	1.223	0.445	0.958594354	0.874	1.716	0.844	1.204675438	1.114	0.655	0.685	0.932	0.551	0.482	0.938	0.774	0.706	0.712296785	0.396	0.686	0.611	0.987130257	0.465	0.161	0.643	0.623	0.593	0.532	0.795	0.683	0.834	0.71	0.561	0.478	0.745	0.712296785	0.562	0.45	0.616
4	123.1805	533.9562111	535.9592061	299.8978911	2.002994946	10051	1	1	0.859	0.917	1.127	1.36088844	1.229	0.62	1.36088844	1.36088844	1.36088844	1.36088844	0.74	0.801	0.67	1.36088844	1.324	1.162	1.004	1.36088844	0.77	1.31	2.272	1.1	2.479	1.387048177	1.946	1.333	1.547	1.735409436	1.925351021	1.692	0.7	1.471	1.326	1.103	1.474	1.985	1.312	2.234	1.804	1.496	2.042
5	123.2055	491.9711211	493.9767683	257.9128011	2.005647262	6137	1	1	0.706	0.859	0.737	0.992233318	0.801	0.701405551	0.985	0.913860068	1.428	0.781505156	0.841	0.603	0.519	0.632686928	0.856	0.704944394	0.929	0.80571765	0.807	0.745776514	0.8	0.691512675	0.622	1.340057671	0.875	0.748	0.639	0.591	0.82	0.875	0.577	0.912	0.845	0.822	0.756	0.614	0.516	0.43	0.485	0.745776514	0.512
6	123.215	569.0661374	571.0728518	335.0078174	2.006714402	13546	1	1	0.580317435	0.576	0.503926619	0.435838909	0.751	0.432	0.35	0.320600023	0.486926178	0.496986899	0.486926178	0.436	0.84	0.790211158	0.525	0.468	0.191	0.379	0.486926178	0.471037708	0.752	0.607545005	0.627	0.495197218	0.565	0.686	0.694	0.558	0.486926178	0.447	0.486926178	0.423	0.82	9.99	0.868	0.539	0.652784567	0.35	0.538	0.495	0.454042881
7	123.2155	425.9889668	427.9970798	191.9306468	2.008112919	5946.5	1	1	1.086	0.934	1.013	1.203	1.043	0.742	0.937	0.85	0.784	0.785654489	0.992	0.591	1.241	1.282	0.989	0.998524366	0.67	1.291	0.563	0.97455452	0.968	1.233961042	1.122	0.962973028	1.192	0.825	1.013	0.699	1.067	0.922	0.829	0.675	0.945	0.885	0.882	1.076	1.122	0.97455452	1.209	0.97455452	1.031
9	123.217	489.9674347	491.971733	255.9091147	2.004298277	4746	1	1	0.932	0.915183919	1.041	0.76862297	1.211	0.63	0.864	0.726429631	0.903	0.861359501	0.694	0.784	0.783	1.389	0.756	0.955	0.553	0.76	0.91	1.035639755	0.856	0.64	1.232	1.193	1.28	1.04	1.211	0.882	0.63	1.392	1.243	0.857	1.134	1.044	0.969	1.207	1.061	1.035639755	0.903	1.035639755	1.044
10	123.218	563.9714527	567.9821122	96.86211269	4.010659475	12138	1	2	0.266	0.104	0.476	0.677	0.429	0.847404799	0.932	1.234	0.865	0.32	0.32	0.138	0.394	0.31	0.541	0.119	0.541	1.170244762	0.8	0.53158266	0.1	0.563150538	0.349	0.31	0.392	0.728	0.554	0.619	0.578	0.347	1.115	0.463	0.34	0.461	0.844	0.336	0.714	0.53158266	0.561	0.31	0.637
11	123.219	353.991709	355.9960429	119.933389	2.004333952	6660	1	1	0.966	0.889	1.047	1.009	0.818	0.707	0.648	0.744	0.83	0.806	0.518	0.957	0.93	0.874	0.718	0.981	0.695	1.037	0.719	0.454	1.127	0.989	0.98	0.934	1.046	0.821	1.079	0.682	0.862	1.006	0.707	0.953	0.921	0.951	0.895	1.052	0.928	0.891	0.98	0.604	1.007
12	123.2191667	493.9770307	495.9848442	259.9187107	2.00781354	6115.333333	1	1	0.938	1.063546863	0.994	0.804	0.968	1.028776267	0.802	0.68721425	0.567	0.905	1.119	0.974485246	0.826	1.100107758	0.822	1.262	0.739	0.74	0.883	0.989270784	1.135	1.100030803	1.178	1.265859532	0.953	0.838	1.171	0.888	1.381	0.94	0.868	0.892	1.051	1.005	0.879	1.095	0.845	0.61	1.114	0.989270784	1.09
13	123.22	446.1491813	448.155776	212.0908613	2.006594711	6380	1	1	0.818	0.801	1.098	1.086	0.823	0.884	0.649	0.765	0.36	0.36	0.469	0.681	1.123	0.901	0.833	0.270661336	0.36	0.720238802	0.748	1.279074102	0.421	0.597	0.784	0.527	0.908	0.643	0.521	0.582	0.821	1.085	0.36	0.796	1.004	1.177	1.159	1.229	0.36	0.229	0.654	0.235	0.36
14	123.221	423.9840957	425.9889504	189.9257757	2.00485469	4616	1	1	0.887	1.37	0.735	0.754	0.851	0.864	1.033	0.972414796	0.894	0.916406078	1.451	0.926	0.977	1.16132869	0.952	0.662	1.016	0.727	1.024	0.901550378	0.906	0.503311778	0.95	0.562922374	0.715	0.823	0.906	1.344	0.859	0.831	0.947	1.058	0.487	0.93	1.147	0.986	0.945	0.901550378	0.775	0.901550378	0.836
15	123.221	421.978522	423.9839871	187.920202	2.005465151	4946	1	1	0.971	1.276	1.181	0.993	1.034	1.075069426	0.858	1.178	1.003	1.261	0.841	1.158	0.894	1.002	0.745	1.461	0.962	1.303142706	0.911	1.075194405	1.317	0.928407886	0.941	0.94	1.34	1.334	1.198	0.892	1.242	1.105	1.086	0.968	1.857	1.26	0.925	0.988	0.984	1.075194405	1.311	0.69	1.086
17	123.226	703.9574376	705.9632051	469.8991176	2.005767582	10566	1	1	0.982	0.788	0.96	0.87264906	0.741	0.87264906	0.53	0.87264906	0.53	0.87264906	0.87264906	0.716	0.87264906	0.87264906	0.81	1.055	0.613	0.87264906	0.69	0.87264906	1.242	0.87264906	1.09	0.87264906	1.01	0.849	0.909	0.71	1.318	0.74	0.658	0.64	0.972	0.847	0.679	0.851	0.763	0.87264906	0.976	0.69	1.072
18	123.2588544	567.9818954	569.9883134	333.9235754	2.006417952	19468.71845	1	1	1.067	0.844	1.027	0.79169046	0.875	1.420274312	0.733	0.656494081	0.819	0.945	1.598	0.73	0.942	1.096	0.687	0.788	0.572	0.719191133	0.685	0.913610078	1.274	1.462040277	1.14	1.167027832	0.932	0.977	0.893	0.829	1.043	1.104	0.682	0.828	1.07	0.996	0.659	1.186	0.924	0.913610078	1.007	1.181	0.857
19	123.2599483	499.9945842	502.0010607	265.9362642	2.006476564	17091.96552	1	1	1.025	0.734	0.931	0.863420665	1.119	1.047292877	0.744	0.676931697	0.826	0.84	0.64	0.746	1.247	0.956282452	0.82	0.939	0.783	0.87163115	0.619	0.927403405	1.083	1.521048387	1.154	1.161628075	1.089	0.868	1.035	0.839	0.98	0.979	1.128	0.613	0.927	0.909	0.825	0.793	0.72	0.927403405	1.121	1.251	1.133
20	123.2626176	397.9808289	399.9849709	163.9225089	2.004142006	9872.529412	1	1	1.235	0.982	1.349	1.257	1.784	1.179	1.935	1.234	1.18	1.741	1.386	1.061	1.538	2.47077376	1.469	1.329	1.24	3.55	1.385	9.99	3.041	4.75	2.422667164	6.54	2.416	1.973	1.824	2.35792014	2.11	2.052	1.658	1.65	1.196	1.728	1.786	2.272	1.352	2.902634688	2.258	2.139	1.929
21	123.2669828	635.9693143	637.9757331	401.9109943	2.006418785	20335.58621	1	1	0.93	0.739	0.96	1.01621964	0.968	0.833907595	0.582	0.837790754	0.749	1.346	0.58	0.738	1.031	1.327	0.803	0.884	0.808	1.280523215	0.886	0.927112794	1.17	0.865	0.88	0.78	0.973	0.86	1.153	0.768	0.767	0.801	0.966	0.703	0.932	0.941	0.861	1.096	1.02	0.927112794	1.178	1.191	1.04
22	123.2752857	465.9682097	467.9720555	231.9098897	2.003845814	8960.714286	1	1	1.23	1.324	1.195	0.77	1.004	1.661	1.768	1.265	1.032	1.173014178	0.863	0.784	2.436205231	0.642	1.434	1.06	0.993	1.452	0.946	1.941424426	1.519	1.98	2.315	1.87719062	1.902	1.888558335	1.887	1.725697763	1.861	2.033	1.823	1.472	1.198	1.306	1.813	2.139	1.317	1.697	1.49	1.703	2.171
23	123.3648828	432.0072863	434.0137434	197.9489663	2.006457073	26636.92414	1	1	0.974	0.949	1.092	0.745	0.762	0.891523636	0.64	0.809	0.771	0.737	0.776	0.789	0.879	1.111599122	1.014	0.981	0.675	1.034869465	0.731	0.954685106	0.936	0.992014913	1.01	0.984976518	0.964	0.833	1.066	0.946	0.899	0.953	0.711	0.627	0.852	0.883	0.848	0.847	0.796	0.918800627	1.007	1.037	0.934
24	123.4078413	364.0198292	366.0263571	129.9615092	2.006527929	28190.92063	1	1	0.884	0.86	0.97	0.859	0.889	0.436	0.646	0.630858549	0.826	0.926	0.643	0.759	0.988	0.960453704	0.852	1.302	0.609	1.097269963	0.787	0.841502653	1.09	1.212334842	1.089	2.484	1.078	0.828	0.856	0.728	0.804	0.977	0.812	0.692	0.933	0.95	0.731	0.891	0.752	0.822	1.05	1.076	0.981
25	123.428	433.0912452	435.0977088	199.0329252	2.006463615	9758.941176	1	1	0.72	0.913	0.69	0.52	0.836	0.849063325	1.21	0.983134305	0.92	0.654768703	0.942	0.707624954	1.167	1.344283048	0.876	1	0.572	0.546120725	0.893	0.804	1.056	0.78	0.965	0.793120101	1.192	1.026	0.658	0.968	0.458	0.719	0.77	0.378	0.659	0.844	0.743	0.601	0.584	0.749	1.025	0.721	0.477
26	123.4567209	447.0265145	449.0329993	212.9681945	2.006484839	13206.83721	1	1	0.663	0.371	0.572	0.369775702	0.485	0.635	1.029	0.381343392	0.463	0.344	0.365	0.448	0.686	0.31	0.589	0.452	0.878	0.532949099	0.874	0.299	1.075	0.623980422	1.107	0.53	0.4	0.491	0.423	0.546	0.564	0.541	0.908	0.24	0.477	0.475	0.487	0.571	0.593	0.657	1.572	1.432	1.151
27	123.5165657	389.1272889	391.1339139	155.0689689	2.006625022	57018.15152	1	1	0.781	0.919	0.76	0.627	0.946	0.82	0.8	0.724	0.813	0.717	0.887	0.653	0.998	0.912	0.866	0.741	0.632	0.77	0.899	0.86	0.874	0.775	0.902	0.852	1.07	1.104	0.699	0.796	0.629	0.687	0.781	0.414	0.777	0.806	0.817	0.841	0.688	0.743	0.777	0.79	0.538
29	123.613	601.9416435	603.9444819	367.8833235	2.002838384	6675	1	1	1.171	0.885	1.069	1.255603648	1.414	1.255603648	1.255603648	1.255603648	1.255603648	1.255603648	1.255603648	1.013	0.67	1.255603648	1.116	1.523	1.107	0.64	1.255603648	0.872	1.86	1.1	1.467	1.09	2.126	1.451	1.41	1.837	1.01	1.736	0.67	1.21	1.109	1.148	1.256	1.589	1.202	0.77	1.197	1.811	1.26
30	123.6365652	329.9932633	331.9981782	95.93494331	2.004914927	23016.26087	1	1	1.242	1.071	1.379	1.107	1.616	1.156	1.115	1.219	0.954	1.205	0.98	1.242	2.24	1.603744885	1.445	1.349	0.978	9.99	1.484	1.195	2.747	9.99	3.503	9.99	3.132	2.236956916	1.948	2.414775164	2.616	2.414	1.46	1.535	1.221	1.507	1.672	2.048	1.397	1.427	1.923	1.851	2.416
31	123.638	545.0780024	549.0914077	77.96866241	4.01340527	9472.571429	1	2	0.354	0.398	0.212801326	0.199	0.642	0.378	0.323192428	0.252	0.385	0.343	0.446	0.232	0.501	0.612	0.442	0.428	0.693	0.443	0.434	0.552	0.446	0.528	0.443	0.555	0.484	0.293	0.529	0.454	0.439	0.41	0.439	0.514	0.266142953	1.31	0.428	0.453	0.296	0.471	0.432388897	0.503	0.297
32	123.997	669.9264423	671.9312249	435.8681223	2.004782565	2618	1	1	0.984	0.966	1.088	1.236654948	0.97	1.236654948	1.236654948	1.236654948	1.236654948	1.236654948	1.236654948	0.971	1.236654948	1.236654948	1.496	1.29	1.052	0.78	1.236654948	1.236654948	1.688	1.236654948	1.741	1.236654948	1.398	1.77	1.738	2.022	1.236654948	1.661	1.236654948	1.03	1.134	1.259	1.319	1.343	1.385	1.236654948	1.409	1.381	1.31
33	123.997	694.8284533	696.8420922	460.7701333	2.013638894	13038	1	1	0.312	0.302	0.368	0.350408323	0.321	0.350408323	0.350408323	0.350408323	0.350408323	0.350408323	0.21	0.35	0.350408323	0.350408323	0.367	0.289	0.315	0.350408323	0.21	0.350408323	0.407	0.350408323	0.328	0.350408323	0.39	0.333	0.447	0.358	0.350408323	0.402	0.350408323	0.375	0.331	0.46	0.356	0.41	0.267	0.350408323	0.355	0.585	0.363
34	124.061	624.8471878	628.8587436	157.7378478	4.011555779	20572	1	2	0.864	0.668	0.777	0.85923895	0.998	0.85923895	0.7	0.85923895	1.015	0.68	1.377	0.73	1.201	0.67	0.833	0.759	0.953	0.86	1.34	0.85923895	0.943	0.85923895	0.891	0.85923895	0.835	0.837	0.888	0.775	0.75	0.825	2.132	0.676	0.692	0.926	0.852	0.97	0.647	1.106470873	0.714	1.142	0.766
35	124.061	760.8216597	762.8211103	526.7633397	1.999450571	4188	1	1	2.624	2.851	2.902	2.717230095	2.69	2.717230095	2.717230095	2.717230095	0.63	2.717230095	2.717230095	2.280595226	2.717230095	2.717230095	2.685	2.913	2.762	2.717230095	2.717230095	2.717230095	2.604	2.717230095	2.566	2.717230095	2.564	2.49	2.488	2.491	2.717230095	2.51	0.77	1.962	2.636	3.342	2.97	2.107	2.479	2.717230095	2.232	3.385	2.312
36	124.181	355.9965725	358.0013559	121.9382525	2.004783328	6214	1	1	1.135	1.659	1.305	1.085	1.531	1.146	1.618	1.505896758	1.869	1.547	1.784	1.523	1.113	1.751	1.502	0.999	1.695	1.056	1.622	1.658	0.962	0.908	1.11	1.149	1.274	1.111	1.564	1.491	1.476	1.327	1.701	1.294	1.252	1.153	1.184	1.335	1.324	1.02	1.232	1.454511667	1.144
37	124.185	375.0768838	377.0835077	141.0185638	2.006623874	4290	1	1	1.267	0.346	0.779	0.959	1.213	0.329	0.872	0.854	0.736	0.606	0.388	0.884395065	0.38	0.38	0.38	0.674897685	0.81	0.38	0.38	0.164271959	9.99	9.99	9.99	9.99	0.641	0.929	0.902	0.856	0.789	0.976	0.632	0.684	0.984	0.544	0.704	0.38	1.283	0.461	0.867	0.178	0.707
40	124.3169091	286.0297607	288.0348058	51.97144066	2.005045183	22113.36364	1	1	0.811	0.71	1.263	0.676	1.324	0.696	0.996	0.704	0.976	0.832	0.843	0.676	1.603	0.779	1.372	0.849	0.734	0.351	1.031	0.755	1.655	0.493	1.251	0.645	1.638	0.638	1.783	0.987	1.482	1.779	0.839	1.289	1.15	0.934	1.444	1.46	0.982	0.9	1.58	1.132	1.279
41	124.3269	387.0675796	389.0741003	153.0092596	2.006520669	4270	1	1	0.926	0.844	1.014	0.419	0.717	0.511	0.868	0.417	0.65	0.384	0.509	0.486	0.521	0.528	0.703	0.569	1.073	0.706	1.188	0.604021138	1.271	0.65	1.234	0.53	0.45	0.56	0.62	0.532	0.794	0.451	0.823	0.53	0.439	0.496	0.61	0.374	0.571	0.524	1.369	1.51	0.78
42	124.3298063	403.0623045	405.068763	169.0039845	2.006458489	16437.4875	1	1	0.646	0.464	0.543	0.34	0.58	0.412	0.693	0.319	0.336	0.326	0.321	0.372	0.474	0.385	0.471	0.5	0.857	0.45	1.033	0.385	0.953	0.52	0.929	0.841	0.32	0.412	0.49	0.559	0.632	0.503	0.777	0.249	0.528	0.497	0.457	0.348	0.707	0.654	1.551	1.409	1.031
44	124.3845085	296.0324863	298.039032	61.97416627	2.006545683	64075.86441	1	1	1.002	0.758	1.077	0.797	0.775	0.785	0.659	0.534	0.706	0.747	0.681	0.718	1.005	1	0.836	0.925	0.604	0.99	0.714	0.748	1.165	1.182	1.003	1.136	1.086	0.887	1.028	0.846	0.939	0.927	0.789	0.684	0.943	0.926	0.808	0.988	0.848	0.823	1.025	1.016	1.049
46	125.6503061	480.1538874	482.1602488	246.0955674	2.006361307	4159.55102	1	1	0.759	0.914	1.504	1.225	1.003	0.886	0.842	0.774	0.534	0.553	0.435	0.343	1.58	1.499	0.322	0.354	0.179	0.499	0.529	0.532	0.1001	0.1001	0.302	0.26	0.452	0.536	0.34	0.345	0.82	0.674	0.336	0.482	1.784	1.658	1.811	0.533	0.1001	0.111	0.503	0.334	0.232
47	125.7472305	351.136612	353.1432597	117.078292	2.00664764	7085.769153	1	1	0.595	0.648	0.837	0.835	0.403	0.645	0.557	0.623	0.307	0.432	0.428	0.401	0.535	0.477	0.426	0.538	0.742	0.688	0.372	0.559	0.435	0.437	0.374	0.705	0.395	0.997	0.418	0.736	0.521	0.621	0.626	1.15	0.652	0.635	0.649	0.626	0.978	0.864	1.079	0.806	0.71
50	126.295	503.1143443	507.1253976	36.00500431	4.011053287	3174	1	2	0.98	0.863	1.239	1.331	0.972	0.793	0.828	0.964	0.882	0.851	0.791	1.154	0.857	0.818	0.832	0.888	0.897	0.748	0.792	0.713	0.966	0.823	1.007	1.279	0.968	1.41	0.814	1.261	1.014	0.821	0.882	1.456	1.434	1.107219702	0.703	0.881	1.089	0.611	1.501	0.663	1.355
55	127.2649091	372.068579	374.0751541	138.010259	2.006575141	6801.454545	1	1	0.933	0.923	1.011	0.821	0.82	0.679	0.709	0.688	0.7	0.624	0.778	1.063	0.967	0.818	0.802	0.954	0.708	0.919	0.74	1.143842827	1.164	1.26108565	1.023	1.076	1.062	0.898	1.037	0.839	1.016	1.023	0.856	0.785	0.877	0.917	0.788	0.951	0.76	0.915	1.024	1.068549903	1.093
59	128.2661364	501.1148049	505.1285349	34.0054649	4.013729967	18238.90909	1	2	0.424	0.482	0.421	0.402	0.418	0.392	0.415	0.304	0.45	0.387	0.35	0.383	0.53	0.569	0.464	0.432	0.635	0.565	0.424	0.499	0.512	0.524	0.515	0.502	0.558	0.523	0.502	0.518	0.564	0.481	0.464	0.316	0.402	0.419	0.427	0.487	0.408	0.433	0.491	0.51	0.494
60	128.274	501.1148306	503.1256993	267.0565106	2.010868696	7322	1	1	2.617055142	8.65	3.842	5.77	5.212435144	6.7	4.611958578	3.634877356	6.79	6.47	5.22	5.23	3.315750345	6.779113529	6.81	6.58	9.7	7.95	6.9	1.088349686	6.22	6.28	5.85	3.210309212	7.17	6.3	4.074492948	7.22	7.38	5.56961607	6.45	1.575616735	2.704	1.375	5.57	6.71	3.305401563	9.99	2.217983735	9.99	3.862863662
62	128.2926667	336.021042	338.0276813	101.962722	2.006639323	7003.333333	1	1	1.009	0.811	1.003	0.836	0.786	0.689	0.746	0.601789597	0.716	0.968	0.697	0.846	1.099	1.096261214	0.77	0.912	0.619	1.064	0.721	1.1375573	1.25	1.230115749	0.881	3.34	1.041	0.954	1.053	0.792	0.933	0.977	0.821	0.78	0.893	0.977	0.791	0.991	0.821	1.149	1.11	1.609230329	1.038
63	129.0235358	366.1476218	368.1540015	132.0893018	2.006379626	18980.31386	1	1	1.608	0.987	1.897	2.285	3.711	0.9	0.528	0.605	0.596	2.13	2.995	1.8	3.603	1.051	3.296	1.016	0.394	0.661	0.644	1.31	1.857	1.962	1.811	1.469	2.937	0.697	4.15	2.426	5.03	3.71	0.48	0.33	1.204	1.169	3.914	4.937	0.237	0.211	0.232	0.199	0.216
69	129.7065294	432.1331163	434.1395469	198.0747963	2.006430553	5100.205882	1	1	0.362	0.295	0.19	0.228	0.509	0.392	0.824	0.826	0.859	0.875	0.792	0.633	0.187	0.205	0.688	0.494	1.012	1.067	1.149	1.107	0.534	0.503	1.405	1.305	1.377	1.306	1.981	1.918	0.1	0.1	0.318	0.286	0.1	0.1001	0.1001	0.462	0.304	0.298	0.135	0.14	0.1001
70	129.7755	282.0789118	284.0853177	48.02059181	2.006405879	5012	1	1	0.487	0.687	0.605	0.558	0.27	0.448	0.797	0.479	0.525	0.27	0.599	0.476	0.447	0.402	0.342	0.622	0.673	0.683	0.619	0.615	0.564	0.406	0.791	0.769	0.41	0.578	0.45	0.627	0.595	0.528	0.734	1.014	0.467	0.584100086	0.493	0.463	0.92	0.27	0.859	0.584100086	0.743
72	130.40745	537.212706	539.2190822	303.154386	2.00637619	10289.05	1	1	0.974	0.977	1.54	1.281	0.633	0.562	0.584	0.503	0.663	0.492	0.662	0.791	0.618	0.716	0.899	0.983	0.62	0.845	0.725	0.85	0.408	0.396	0.529	0.476	0.744	0.8	0.396	0.397	0.876	0.776	0.468	0.344	0.82	0.834	0.801	0.738	0.638	0.684	0.787	0.755	0.534
74	131.3851667	501.1149201	503.1234146	267.0566001	2.008494574	4206.666667	1	1	2.453	4.963	3.321	3.043	5.212	4.768	4.612	3.635	5.231	5.413	5.436	3.412	3.316	4.309	5.185	5.545	6.933	4.07	6.267	1.088349686	4.936	4.79	4.745	3.21	4.961	3.364	4.074	4.603	5.345	4.967	3.779	1.576	3.087	1.27	4.769	5.31	3.305	7.255	3.11	7.306	2.146
75	131.6984253	494.1696697	496.1759609	260.1113497	2.006291206	5195.747126	1	1	0.884	1.146	1.26	1.182	0.616	0.593	1.587	1.473	0.152	0.142	0.605	0.546	1.905	1.745	0.115	0.12	0.317	0.486	0.712	0.715	0.12	0.12	0.224	0.239	0.555	0.857	0.156	0.159	1.205	1.217	0.106	0.116	1.89	1.757	1.468	0.42	0.12	0.1	0.166	0.166	0.483
78	133.6229412	404.1273014	406.1338853	170.0689814	2.006583985	5967.647059	1	1	1.274	1.917	1.03	0.914	1.184	1.145	0.25	0.25	1.194	1.137	1.689	1.618	0.796	0.985	0.722	0.717	1.9	1.621	1.247	1.344	0.52	0.292	0.659	0.518779971	0.615	0.519	0.25	0.366	0.25	0.309	0.779	0.251	0.645	0.368	0.445	0.846	2.903	2.728	0.559	0.441	1.839
80	134.1325207	414.1209387	416.1277931	180.0626187	2.00685445	7902.652921	1	1	0.612	0.574	0.886	0.734	2.918	1.735	0.715	0.556	0.835	0.714	0.815	0.64	0.984	0.761	0.842	0.669	1.488	0.94	0.971	1.091	0.99	1.14	1.101	0.835	1.043	0.967	1.113	1.074	0.894	0.756	0.905	0.943	0.824	0.833	0.87	0.886	0.722	0.783	0.969	1.046	0.653
81	134.1362273	440.1484799	442.1549984	206.0901599	2.006518547	6616.818182	1	1	1.324	1.195	1.153	0.939	1.047	1.277	0.16	0.16	1.039	0.861	1.677	2.218	0.817	0.663	0.724	0.83	1.34	1.101026698	1.18	1.141	0.434	0.341037302	0.598	0.835	0.558	0.632	0.711436535	0.16	0.16	0.336	0.466	0.209	0.528	0.423	0.458	0.976	2.661	2.239	0.634	0.476	1.406
82	134.4879763	576.1736922	578.1803396	342.1153722	2.006647473	9609.116336	1	1	0.463	0.464	0.183	0.21	8.847	1.391	0.375	0.337	0.582	0.648	0.299	0.212	0.638	0.437	0.224	0.18	0.324	0.171	0.297	0.365	1.021	0.874	0.992	1.037	0.286	0.289	0.445	0.424	0.739	0.652	0.238	0.192	0.389	0.506	0.412	0.396	0.123	0.128	0.106	0.127	0.188
83	134.5100476	508.1858369	510.1922528	274.1275169	2.006415949	4143.428571	1	1	0.57	0.726	0.599	0.784	0.494	0.535	0.769	0.672	0.692	0.46	0.562	0.706	0.714	0.413	0.684	0.754	1.629	0.661	0.805	0.678	0.88	0.403	0.518	0.658745067	0.896	0.955	0.458	0.481	0.84	0.718	0.788	0.69	0.616	0.521	0.618	0.848	1.281	1.09	2.456	2.069	1.791
84	134.526	558.1642202	560.1709094	324.1059002	2.006689203	2110	1	1	0.898	0.784	0.285	0.425	2.569	2.122	0.855	0.711	1.258	1.202	0.532	0.384	1.079	1.059	0.469	0.243	0.33	0.364	0.657	0.848	1.807	1.636	2.311	2.378	0.542	0.499	0.768	0.741	1.034	1.061	0.465	0.452	0.63	0.654	0.837	0.807	0.29	0.212	0.2	0.192	0.368
85	134.9337907	376.1066162	378.1131852	142.0482962	2.006569013	13126.60465	1	1	0.568	0.569	0.708	0.576	0.68	0.536	0.601	0.498	0.552	0.573	0.741	0.893	0.546	0.401	1.028	0.907	0.888	1.033	0.844	0.928	0.88	0.715	0.543	0.401	0.792	0.813	0.941	0.897	0.805	0.734	0.428	0.584	0.591	0.522	0.503	0.748	0.797	0.68	0.911	0.655	0.917
87	135.7102605	495.0885377	497.0948885	261.0302177	2.006350787	16309.07907	1	1	0.481	0.554	0.645	0.581	0.903	0.793	0.485	0.473	0.683	0.715	0.653	0.654	0.535	0.533	0.629	0.641	0.536	0.691	0.643	0.692	0.946	0.958	0.858	0.798	0.79	0.876	0.72	0.789	1.066	1.119	0.527	0.301	0.63	0.639	0.579	0.52	0.946	0.92	0.826	0.837	0.67
90	137.2501429	437.1139505	439.1207475	203.0556305	2.006797046	3415.428571	1	1	0.575	0.577	0.682	0.631	0.833	0.925	0.527	0.649	0.693	0.617	0.779	0.641	0.622	0.524	0.708	0.817	0.571	0.603543797	0.519	0.752	1.05	1.144	0.86	0.889474512	0.631	0.888	0.7	0.743	0.987	1.226	0.459	0.354	0.669	0.684	0.693	0.571	1.047	1.042	0.917	0.907	0.789
91	137.392	569.191315	571.1985948	335.132995	2.007279772	2340	1	1	0.643	0.79	0.635	0.32	1.098	0.623	0.755	0.422	0.21	0.4277849	0.988	0.664639734	0.929	1.095628065	0.724	0.58703065	1.255	0.661479279	0.618	0.787986797	0.547	0.941011681	0.686	0.3992885	0.619	0.62439343	0.808	0.793975423	0.509	0.389	0.727	0.534	0.723	0.586	0.776	1.032	1.197	1.14	1.253	1.618	1.13
94	140.2927727	320.043639	322.0502523	85.985319	2.006613302	5654.181818	1	1	1.363	1.298	0.818	0.788	0.711	0.671	0.461	0.485	0.61	0.711	1.176	1.144	1.167	1.056	1.007	0.844	1.509	1.057	0.695	0.855	1.072	0.994	0.709	0.677	0.867	0.917	0.743	0.839	0.924	0.862	1.017	2.017	0.694	0.808	0.697	0.705	0.622	0.686	0.78	0.97	0.678
96	140.595	438.0467608	440.0527328	203.9884408	2.005971985	3210	1	1	0.568	0.575	0.472	0.382	0.762	0.888	0.747	0.659	0.885	0.773	0.753	0.892	0.832	1.243	0.701	0.755	0.253	0.999	0.979	0.908926098	0.467	0.492	0.627	0.707	1.006	1.246	0.969	1.058	0.377	0.404	1.021	0.919	1.102	0.975	0.782	0.535	0.227	0.204	0.26	0.275	0.299
98	140.8862222	276.0799521	278.0865924	42.02163213	2.006640238	317955.3667	1	1	1.52	1.302	0.81	0.702	0.666	0.623	0.386	0.341	0.569	0.726	0.98	1.039	1.275	1.14	0.839	0.81	1.003	0.988	0.63	0.713	0.991	0.98	0.748	0.628	0.955	0.952	0.787	0.809	0.796	0.745	0.846	1.826	0.661	0.626	0.687	0.713	0.586	0.633	0.782	0.824	0.651
100	142.4953	413.1364637	415.1425222	179.0781437	2.006058532	16426.75	1	1	1.659	0.996	2.244	1.834	1.942	0.662	0.587	0.602	0.485	1.508	2.158	1.72	2.112	0.889	1.895	0.725	0.436	0.78	0.61	0.833	1.086	1.124	1.726	0.955	1.993	0.814	2.545	1.523	3.503	2.395	0.549	1.556	0.764	0.807	1.867	2.594	0.462	0.517	0.552	0.565	0.443
101	142.646	438.0430846	440.0489688	203.9847646	2.005884211	11488	1	1	0.602516054	0.613	0.497074422	0.418	0.75687782	0.908	0.739690578	0.648	0.891315927	0.723	0.767112542	0.681	0.896207613	1.086	0.727290109	0.77	0.229435765	0.928	0.952429624	0.919	0.543	0.504	0.539	0.724	0.968	1.38	1.07	1.072	0.370530541	0.393556512	1.049333702	0.916888507	1.115643467	1.106	0.77376057	0.677	0.142543942	0.191970361	0.253702402	0.314906057	0.301864653
104	143.3457255	403.0363763	405.0428129	168.9780563	2.006436665	33355.80392	1	1	0.538	0.611	0.487	0.423	0.765	0.933	0.715	0.694	0.921	0.753	0.687	0.682	0.861	1.133	0.706	0.818	0.22	0.911	0.919	0.974	0.493	0.51	0.638	0.71	0.953	1.43	1.002	1.126	0.349	0.366	1.023	0.881	1.061	1.07	0.82	0.565	0.18	0.177	0.286	0.258	0.282
105	143.85	403.1434511	405.1500205	169.0851311	2.00656943	368192	1	1	0.823	0.811	0.675	0.591	0.74	0.709	0.414	0.383	0.696	0.737	0.926	1.078	0.647	0.702	0.987	0.947	0.819	0.899	0.8	0.816	0.77	0.745	0.68	0.641	0.68	0.813	0.623	0.672	0.667	0.641	0.706	0.469	0.646	0.643	0.599	0.622	0.981	0.906	0.942	0.697	0.803
106	144.1745581	359.0724923	361.0790769	125.0141723	2.006584516	3809407.842	1	1	0.505	0.617	0.474	0.41	0.808	0.914	0.7	0.692	0.858	0.709	0.647	0.697	0.845	1.197	0.728	0.835	0.198	0.904	0.945	0.954	0.496	0.522	0.659	0.642	1.011	1.407	1.021	1.096	0.355	0.353	1.07	0.943	1.019	1.049	0.815	0.563	0.172	0.185	0.267	0.254	0.234
108	145.4146667	397.0203214	399.027381	162.9620014	2.007059626	3438.333333	1	1	0.499	0.572	0.463	0.363	0.724	0.807	0.702	0.594	0.798	0.677	0.54	0.585	0.835	1.039	0.696	0.727	0.351	0.946	0.766	0.83	0.457	0.482	0.555	0.618	0.962	1.159	0.892	1.067	0.311	0.337	0.928	0.865	1.052	0.906	0.85	0.545	0.409	0.271	0.332	0.327	0.424
109	145.8683814	388.1068836	390.1134229	154.0485636	2.006539371	232567.507	1	1	0.335	0.339	1.352	1.324	1.061	0.833	1.349	1.146	0.791	0.783	0.742	0.672	1.355	1.161	0.675	0.58	0.671	0.574	0.857	0.915	0.554	0.527	0.667	0.578	1.149	1.133	1.625	1.769	0.663	0.688	0.923	1.143	1.242	1.251	1.283	0.549	0.66	0.687	0.755	0.77	0.494
110	148.5964941	373.0880677	375.0943593	139.0297477	2.006291592	10710.07059	1	1	0.713	0.779	0.361	0.356	0.1001	0.1001	0.381	0.366	0.601	0.637	1.454	1.358	1.404	1.503	0.957	0.968	0.231	0.164	0.33	0.346	1.061	1.185	0.77	0.763	0.449	0.494	0.427	0.426	0.247	0.217	2.685	2.348	0.16	0.154	0.143	1.212	0.374	0.368	0.387	0.376	1.634
111	148.78725	474.0821836	476.0872169	240.0238636	2.005033304	15752.66667	1	1	1.231	0.382	1.77	3.474728089	3.885	0.375	0.275	0.254	0.403	2.787	5.408	3.052	3.328	0.436	3.858	0.669	0.488	0.49	0.227	0.594	0.854	1.475	2.196	1.094	4.886	0.523	5.48	3.665141352	4.633	6.445	0.236	0.17	0.746	0.665	4.517	4.081	0.326	0.31	0.232	0.234	0.4
112	149.0442	367.1322106	369.1389359	133.0738906	2.006725298	11158.8	1	1	0.549	0.646	0.576	0.546	0.362	0.384	0.244	0.307	0.256	0.325	0.448	0.485655451	0.453	0.425	0.315	0.465	0.515	0.370046645	0.272	0.385796001	0.282	0.352	0.3	0.618	0.357	0.592	0.306	0.521	0.614	0.697	0.519	0.218	0.367	0.362	0.358	0.514	0.757	0.655	0.473	0.475	0.618
113	149.1852192	414.1215442	416.1278514	180.0632242	2.006307198	8073.726027	1	1	0.623	1.095	0.821	0.626	2.348	0.755	0.727	0.65	0.789	0.806	0.821	0.56	0.891	0.682	0.822	0.607	0.968	1.041	0.949	0.775	0.952	1.251	1.043	0.755	0.998	1.015	1.113	1.018	0.883	0.839	0.865	0.909	0.795	0.789	0.85	0.83	0.639	0.647	0.971	1.046	0.672
114	150.845	598.1555212	600.1610535	364.0972012	2.005532356	2050	1	1	0.6	0.923	0.484	0.52	9.99	1.806	0.97	0.772	0.803	0.934	1.358	0.887	1.55	0.444	0.882	0.52	1.453	1.185	0.52	0.503	0.784	1.029	1.521	0.962	0.656654409	0.672525512	0.747	0.536	1.046	0.761	0.528	0.52	0.881	0.782	0.739	0.667	0.747	0.777	0.52	0.532	0.52
115	151.02375	385.0350237	387.0397511	150.9767037	2.004727346	8986.5	1	1	0.844	0.5	1.41	0.853	2.237	0.575	0.18	0.327	0.418	1.292	2.155	0.895	2.05	0.817	1.945	0.812	0.569	0.745	0.18	0.525	0.792	1.466	1.449	1.141	2.249	0.877	2.018	0.967	2.328	1.436	0.364	0.18	0.598	0.758	2.146	2.462	0.649	0.512	0.424	0.959	0.647
116	151.716	681.2187333	683.22514	447.1604133	2.006406628	3364	1	1	0.993	0.854634851	0.42	0.42	0.684	0.560584688	0.632	0.753231525	0.69	0.738	0.42	0.42	0.725	0.42	0.42	0.42	0.42	0.42	0.665	0.526	0.42	0.42	0.623	0.42	1.248	0.989	0.608	0.42	0.885	0.816	0.548	0.429	0.42	0.503	0.42	0.884	0.42	0.371	0.42	0.338	0.60724926
117	151.8398421	317.1312111	319.1378957	83.07289111	2.006684547	6484.105263	1	1	0.938	0.796	0.93	0.838	0.921	0.844	0.904	0.779	0.948	0.814	0.989	0.898	1.057	0.851	0.95	0.803	0.881	0.786	0.931	0.824	0.933	0.839	0.948	0.816	0.956	0.844	0.928	0.845	0.954	0.898	0.862	0.832	0.865	0.824	0.891	0.923	0.88	0.812	0.854	0.817	0.885
118	151.9779167	501.1520185	503.1587824	267.0936985	2.006763913	5167	1	1	0.749	0.818	0.61	0.454	1.295	0.683	0.467	0.397	0.594	0.567	1.515	0.397	0.831	0.994	0.51	0.406	0.576	0.762	0.318	0.517	0.893	0.901	0.993	0.886	0.76	0.77	0.583	0.531	2.154	0.81	0.519	0.481	0.756	0.735	0.874	0.487	0.55	0.527	0.499	0.533	0.427
119	152.6877684	366.1476464	368.1539857	132.0893264	2.00633935	25140.11267	1	1	1.552	0.729	1.898	2.926	3.671	0.609	0.488	0.454	0.592	2.895	2.893	2.494	3.589	0.772	3.3	0.789	0.392	0.437	0.656	0.85	1.836	1.634	1.777	1.04	2.795	0.595	4.038	3.526	4.918	3.587	0.463	0.321	1.198	1.15	3.774	4.824	0.237	0.209	0.228	0.204	0.221
120	152.9402	501.1152195	503.1233352	267.0568995	2.008115714	2418	1	1	3.373	6.76	2.912	1.355	5.212	6.16	3.453	2.584526116	0.953	6.47	3.062512691	2.676379279	2.039	4.429048739	6.81	1.645946609	5.169901507	5.93	0.876344738	1.088	5.124969121	4.83	2.073	3.21	0.803	1.611988871	4.074	1.804	2.828750355	3.652110835	0.851	0.618	2.384	1.106	1.050066341	1.097	3.999	5.668372451	2.161	9.99	2.062
122	153.4585	380.163645	382.1702101	146.105325	2.006565056	3937	1	1	1.196	0.89	2.066	2.108	3.167	0.93	0.577	0.873	0.615	1.568	2.271	1.442	2.921	1.176	2.429	1.126	0.63	0.864	0.499	0.949	1.464	1.584	1.588	1.405	3.037	1.395	3.246	1.775	5.994	3.707	0.551	0.446	1.027	1.045	2.228	2.882	0.223	0.24	0.365	0.377	0.304
123	153.5146842	576.1738133	578.1802215	342.1154933	2.00640828	16088.31579	1	1	0.42	0.1	0.196	0.12	9.99	4.537896547	0.286	0.400347907	0.556	0.133	0.287	0.1	0.481	0.162	0.185	0.197	0.343	0.1	0.283	0.283	0.665	0.1	0.735	0.1	0.272	0.1	0.359	0.288	0.631	0.581	0.215	0.174	0.323	0.516	0.305	0.276	0.123	0.244	0.1	0.127	0.121
124	154.7332283	432.1331573	434.1396317	198.0748373	2.006474401	18046.06522	1	1	0.365	0.292	0.185	0.157	0.516	0.393	0.844	0.736	0.838	0.875	0.781	0.738	0.172	0.139	0.688	0.611	1.034	1.21	1.092	1.099	0.495	0.465	1.388	1.331	1.354	1.394	1.927	1.926	0.1	0.1	0.32	0.293	0.1	0.1001	0.1001	0.442	0.299	0.277	0.132	0.136	0.1001
126	155.024	343.1216158	345.1285648	109.0632958	2.006948985	2162	1	1	0.796	0.862	0.661	0.943	0.965579837	0.942	1.058	1.156	0.46	0.46	0.877	0.599	1.312	1.718	0.629	0.782	0.579	0.306	0.849	0.928	3.574	1.817	0.763	0.667	1.013	0.92	0.989	0.29	0.617	0.512	0.46	0.46	1.412	2.428	2.073	0.44	0.46	0.46	0.46	0.469	0.46
127	155.1187552	454.1280959	456.1337069	220.0697759	2.005611001	6975.58042	1	1	0.991	1.019	0.57	0.42	0.773	0.331	0.897	0.793	0.758	0.329	0.547	0.551	0.743	0.655	0.488	0.529	0.568	0.367	0.671	0.497	0.657	0.61	0.578	0.528	0.87	1.025	0.748	0.598	0.615	0.659	0.751	0.712	0.683	0.89	0.809	0.604	0.476	0.796	0.528	0.917	1.113
128	155.135125	460.164146	462.1707767	226.105826	2.0066307	4487	1	1	0.67	0.881	0.783	0.92	0.409	0.766	0.834	0.921	0.37	0.294	0.438	0.43	1.575	1.685	0.336	0.263	0.433	0.462	0.87	0.815	2.998	5.03	0.756	0.728	0.889	0.954	0.218	0.288	0.509	0.506	0.26	0.26	1.653	2.229	1.254	0.353	0.768	0.833	0.26	0.226	0.435864464
129	155.913	546.1640168	548.1703498	312.1056968	2.006333062	2972.923077	1	1	0.658	0.53	0.53	0.445	0.647	0.594	0.49	0.55	0.633	0.481	0.535	0.398	0.62	0.54	0.6	0.48	0.445	0.875	0.462	0.534	0.587	0.712	0.702	0.474	0.717	0.744	0.709	0.693	1.81	1.484	0.507	0.564	0.685	0.613	0.818	0.555	0.494	0.491	0.589	0.634	0.545
130	156.836	514.131587	516.1378422	280.073267	2.006255237	3026	1	1	0.826	0.728	0.776	0.537208671	1.18	0.41	1.225	1.825	0.769	1.003	0.878	1.386	0.72	0.528	1.831	2.297610654	0.397	0.437	1.101	1.418238452	1.113	1.104	0.744	0.981756386	0.886	0.851	0.768	0.587	0.542	0.585	1.394	0.754	0.705	0.723	0.632	0.913	0.41	0.359	0.655	0.774	1.003
131	157.5655	478.0304472	480.0364583	243.9721272	2.006011091	3457.5	1	1	0.909	0.784	0.789	0.633	1.184	1.239	0.574	0.465	1.007	0.796	0.79	0.672071847	1.029	0.983	0.764	1.115236469	0.714	0.957	0.675	0.957017984	1.213	1.213	1.255	1.046	1.066	0.913	0.79	0.901236144	0.691	1.134	0.79	0.607	1.003	0.968	0.787	0.79	0.853	0.957017984	0.926	0.74	1.004
132	158.2745333	355.0774259	357.0835578	121.0191059	2.006131865	7025.133333	1	1	0.872	0.459	1.094	0.755	1.943	0.634	0.224	0.474	0.4	1.266	2.274	0.847	1.684	0.59	1.785	0.763	0.586	0.583	0.323	0.656	0.858	1.472	1.725	1.335	2.474	0.786	2.641	0.618	2.697	3.195	0.374	0.34	0.545	0.584	2.276	3.343	0.555	0.572	0.441	0.398	0.574
134	158.9429236	385.0880434	387.0944973	151.0297234	2.00645393	23277.41667	1	1	0.526	0.552	0.455	0.446	0.731	0.689	2.021	1.913	0.494	0.521	0.726	0.69	0.699	0.735	1.545	1.36	0.644	0.532	1.023	1.065	1.848	1.515	0.984	0.913	1.033	1.06	0.513	0.571	0.476	0.414	1.456	1.38	0.966	0.923	0.921	0.67	0.397	0.391	0.876	0.883	1.086
135	158.9501777	525.2483195	527.2548401	291.1899995	2.006520676	13170.60914	1	1	0.808	0.856	0.83	0.775	0.746	0.675	0.734	0.742	0.603	0.594	0.77	0.703	0.778	0.954	0.777	0.707	0.722	0.754	0.697	0.747	0.369	0.42	0.554	0.539	0.938	1.051	0.51	0.507	0.777	0.772	0.613	0.309	1	1.048	0.889	0.64	0.622	0.735	0.861	0.825	0.767
136	159.1088558	408.169508	410.1761033	174.111188	2.006595268	1403232.484	1	1	0.758	0.891	0.809	0.798	0.726	0.713	0.765	0.74	0.624	0.554	0.765	0.692	0.802	0.882	0.764	0.785	0.793	0.83	0.716	0.773	0.371	0.386	0.573	0.552	0.91	1.118	0.51	0.524	0.771	0.808	0.611	0.33	1.05	1.047	0.927	0.612	0.734	0.722	0.884	0.871	0.774
137	160.0432747	363.1002256	365.1069476	129.0419056	2.006722062	10692.04396	1	1	1.009	1.125	1.363	1.258	0.522	0.488	0.668	0.66	0.673	0.633	0.55	0.555	0.507	0.568	0.944	0.995	0.975	0.711	0.818	0.864	0.534	0.524	0.629	0.535	0.754	0.796	0.287	0.31	0.541	0.53	0.546	0.423	0.63	0.694	0.584	1.025	1.039	1.033	1.223	1.17	0.869
138	160.1366559	349.1212648	351.1278695	115.0629448	2.006604687	37481.26882	1	1	0.741	0.92	0.843	0.83	0.787	0.723	0.778	0.821	0.69	0.59	0.806	0.749	0.824	0.911	0.824	0.788	0.793	0.918	0.681	0.787	0.391	0.422	0.552	0.559	0.949	1.078	0.571	0.539	0.843	0.833	0.632	0.36	1.058	1.088	0.981	0.602	0.783	0.774	0.942	0.928	0.76
140	160.5622785	321.0899506	323.0966028	87.03163064	2.006652204	13753.93945	1	1	0.485	0.571	0.48	0.48	0.716	0.574	2.13	1.774	0.572	0.556	0.76	0.741	0.698	0.738	1.533	1.532	0.615	0.557	1.001	1.117	1.721	1.303	0.982	0.956	1.101	1.041	0.489	0.553	0.436	0.438	1.31	1.469	1.009	0.991	0.947	0.695	0.424	0.482	0.883	0.872	1.17
141	161.132	531.1038044	533.1091942	297.0454844	2.005389752	8588	1	1	0.506	0.455	0.455	0.515	0.491	0.541	0.19	0.572	0.351	0.486	0.56	0.766	0.477	0.659	0.525	0.977	0.659	0.695	0.319	0.771	0.472	0.888	0.707	1.101	0.544	0.781	0.577	0.582	0.684	0.838	0.373	0.19	0.497	0.446	0.444	0.58	0.628	0.653	0.484	0.417	0.569
142	161.175	578.1824429	582.1968315	111.0731029	4.014388522	7516	1	2	9.99	8.674289378	1.707	1.995217811	9.99	3.114585118	5.291	1.681767961	9.99	9.99	3.024	7.953488635	3.016	1.742	1.533	9.99	9.99	9.759326059	4.852	0.7	9.99	2.911294885	7.824	9.99	7.208	1.344	9.868	8.194137913	9.99	9.888	1.329	9.99	9.99	1.517	7.857	9.99	9.99	3.051	9.99	1.245	9.99
144	162.201	576.1802506	578.1838979	342.1219306	2.003647263	4814	1	1	0.388	0.490793742	0.1	0.1001	6.649	0.411904567	0.1	0.1001	0.1	0.1001	0.1	0.1001	0.164	0.1001	0.318	0.365064829	0.223	0.1001	0.1	0.443	0.377	0.1001	0.59	0.1001	0.221	0.641408947	0.417	0.598	0.418	0.597	0.326	0.1	0.151	0.445415561	0.345	0.1	0.547	0.4	0.1	0.294	0.1
145	162.7063979	495.1545546	497.1608302	261.0962346	2.006275594	14043.78339	1	1	0.865	1.059	0.833	0.824	0.899	0.912	0.807	0.6	1.032	0.941	0.746	0.906	0.928	1.073	0.691	1.058	0.586	0.651	0.903	0.957	0.48	0.616	0.409	0.534	0.698	0.997	0.467	0.587	0.583	0.628	0.861	0.848	0.828	0.816	0.628	0.643	0.613	0.757	0.607	0.7	0.56
147	163.1915	582.1959836	584.2023629	348.1376636	2.006379339	6068.5	1	1	0.68	0.821	0.693	0.68	0.707	0.66059619	0.789	0.69	0.76	0.68	0.983	1.169	0.943	0.982	0.797	0.714	0.858	1.06	0.841	0.782	0.669	0.68	0.853	0.68	1.09	0.824	0.583	0.697	0.705	0.819	0.691	0.68	0.865672445	0.91	0.805	1.022	0.68	0.688	0.68	0.77	0.68
149	164.264	478.0305536	480.0371563	243.9722336	2.006602723	4786	1	1	0.922	0.784	0.789	0.633	1.184	1.239	0.574	0.497	1.007	0.796	0.79	0.823035778	1.029	0.983	0.764	1.06617409	0.632	0.957	0.675	0.79	1.213	1.213	1.185	1.046	1.066	0.697	0.79	0.901236144	0.691	1.134	0.79	0.607	1.003	0.963	0.787	0.79	0.853	0.962864401	0.931	0.74	1.043
151	164.9942222	618.1655988	620.1718427	384.1072788	2.006243818	4566.666667	1	1	0.749	1.01	1.114	0.825	0.774	0.82	0.73	0.713	0.67	0.671	0.76	1.288170183	0.824	0.85	0.88	0.918	0.759	0.574	0.683	0.757	0.401	0.404	0.658	0.603	0.824	1.063	0.716	0.48	0.735	0.91	0.824	0.337	0.971	1.134	0.824	0.974	0.825	0.729	0.813	0.802	0.72
156	166.201755	509.1697702	511.1762887	275.1114502	2.006518464	219538.4603	1	1	0.982	0.996	1.349	1.297	0.511	0.511	0.68	0.634	0.641	0.634	0.554	0.526	0.474	0.501	0.911	0.897	1.017	0.635	0.786	0.844	0.482	0.474	0.584	0.563	0.656	0.726	0.297	0.319	0.534	0.487	0.573	0.373	0.64	0.648	0.599	0.992	1.045	1.029	1.216	1.235	0.911
157	166.3742941	380.1268824	382.1336006	146.0685624	2.006718178	9098.235294	1	1	0.901	1.053	1.109	1.254	0.558	0.466	0.636	0.621	0.724	0.64	0.615	0.632	0.53	0.585	0.838	0.703	0.999	0.583	0.877	0.634	0.516	0.396	0.686	0.563	0.771	0.734	0.55	0.313	0.846	0.589	0.519	0.412	0.636	0.633	0.612	1.107	0.944	0.901	1.115	1.09	0.825
158	166.4512322	414.1213077	416.1278077	180.0629877	2.006499971	26933.21327	1	1	0.612	0.704	0.809	0.834	1.007	0.77	0.678	0.605	0.706	0.79	0.787	0.712	0.875	0.821	0.8	0.785	0.922	0.929	0.801	1.121	0.846	0.955	0.985	1.001	0.98	1.07	1.036	1.105	1.144	0.872	0.794	0.848	0.703	0.784	0.853	0.852	0.523	0.556	0.86	1.002	0.62
159	166.5675625	464.1480985	466.1546781	230.0897785	2.006579594	5499.8125	1	1	0.979	0.941	1.173	1.169	0.526	0.501	0.628	0.52	0.699	0.57	0.612	0.515	0.466	0.512	0.895	0.821	1.042	0.645	0.776	0.746	0.481	0.514	0.562	0.56	0.708	0.783	0.32	0.326	0.508	0.441	0.6	0.343	0.753	0.572	0.618	0.904	1.045	1.114	1.17	1.242	0.822
161	167.0415	531.1524079	533.1582974	297.0940879	2.005889527	22835	1	1	1.509	3.087	2.136	4.55	1.145	3.589	1.211	3.58	1.118	3.689	1.254	0.863	0.948	1.695	1.34	3.768	1.475	0.986	1.328	5.259	1.112	6.314	1.212	9.99	1.288	4.65	1.007	0.743	1.079	1.241	1.039	1.119	1.729	1.112	1.049	1.644	1.722	1.81	1.902	1.83	1.641
162	167.117902	509.1701208	511.1765975	275.1118008	2.006476711	114603.6863	1	1	1.009	0.996	1.362	1.312	0.506	0.511	0.68	0.635	0.641	0.634	0.555	0.608	0.474	0.501	0.912	0.893	1.027	0.639	0.791	0.883968404	0.493	0.47	0.585	0.565	0.646	0.725	0.293	0.319	0.537	0.499	0.573	0.472	0.641	0.649	0.599	0.99	1.058	1.029	1.219	1.23	0.914
164	168.4914434	481.1383588	483.1447691	247.0800388	2.006410289	5557.494796	1	1	0.88	0.74	0.704	0.8	1.141	0.99	0.808	0.705	1.016	0.965	1.091	1.071	1.686	1.871	0.6	0.581	0.569	0.663	0.848	1.035	0.535	0.632169919	0.382	0.273	1.287	1.721	0.876	1.014	1.088	1.065	1.209	1.075	0.792	0.734	0.713	0.635	0.33	0.307	0.372	0.263	0.754
169	169.391	471.1221577	473.1298708	237.0638377	2.007713163	6034	1	1	0.274	0.374	0.229	0.238	0.369	0.383	0.34	0.345	0.293	0.324	0.314	0.362	0.436	0.449	0.393	0.367	0.364	0.417	0.316	0.351	0.446	0.409	0.483	0.417	0.458	0.358	0.404	0.506	0.31	0.321	0.389	0.477	0.347	0.309	0.347	0.359	0.418	0.344	0.322	0.343	0.296
170	170.0771429	367.0973786	369.1019265	133.0390586	2.004547912	4272.857143	1	1	0.933	0.744	1.156	0.819	0.738	1.348	0.57	0.908	0.803	0.816	0.733	0.743	0.562	0.77	0.945	1.243	0.844	1.517	0.65	1.644	0.76	0.921	0.662	1.175	0.788	1.298	0.803	1.123	0.742	0.928	0.836	1.46	0.903	0.714	0.713	1.038	0.999	1.017	0.99	0.844	0.931
172	170.4	683.2420332	685.2499613	898.3674264	2.007928065	1806	2	2	0.845	1.087	1.099	1.206	1.03	1.408	0.956	1.11	1.017	1.48	0.977	1.129	0.946	1.209	0.903	0.859	0.92	1.057	0.854	0.919937848	0.896	1.098629875	0.905	1.001236008	0.88	1.158	0.907	1.169	1.08	1.107	0.924	1.139	1.049	1.019	1.079	0.93	0.736	0.948	0.602	0.935	0.499
174	171.4140208	552.1757628	554.1817776	318.1174428	2.006014761	3772.25	1	1	0.134	0.201	0.292	0.56	0.727222828	0.56	0.338	0.203	0.212	0.158	0.567262009	0.56	0.695872307	0.80443089	0.749394589	0.518691937	1.362	0.56	0.56	0.11	0.56	0.56	0.56	0.56	0.786	0.413	0.222	0.935542926	0.239	1.037063693	0.722328033	0.640654029	0.56	0.291	0.56	0.56	1.226	1.06	1.425	1.157	0.681
175	171.435	383.1270542	385.133501	149.0687342	2.006446806	25806	1	1	0.755	0.794	0.718	0.647	1.04	0.978	0.917	0.744	0.906	0.805	0.838	0.884	0.759	0.784	0.846	0.821	0.755	0.705	0.981	1.497	1.302	1.304	0.881	0.876	0.622	0.771	0.748	0.768	0.688	0.644	1.281	0.769	1.011	0.982	0.969	0.787	0.708	0.741	1.118	1.283	0.813
176	171.5324138	426.1308675	428.1388135	192.0725475	2.007946004	7019.258621	1	1	0.505	0.504	1.546	1.35	0.829	0.787	1.429	1.149	0.545	0.507	0.482	0.391	0.952	1.053	0.424	0.35	0.39	0.527	0.993	0.917	0.895	0.762	0.471	0.476	1.263	1.356	0.437	0.581	1.484	1.419	0.537	0.506	1.896	1.463	1.465	0.781	0.263	0.209	0.947529716	0.293	0.702
177	171.6086364	538.1961285	540.2025897	304.1378085	2.006461197	4399.272727	1	1	0.86	0.88	1.033	1.148	0.527	0.454	0.591	0.512	0.536	0.471	0.628	0.599	0.439	0.421	0.978	0.983	1.085	0.664	0.836	0.94	0.454	0.364	0.581	0.442	0.403	0.544	0.378	0.329	0.614	0.69	0.479	0.359	0.738	0.745	0.56	0.788	1.278	1.432	0.802	1.038	0.71
179	172.4045306	296.032849	298.0394388	61.97452898	2.0065898	8550.44898	1	1	1.038	0.808	1.077	0.781	0.832	0.697	0.691	0.559	0.706	0.841	0.749	0.766320923	1.001	0.921	0.856	1.702	0.611	1.001654403	0.747	0.814	1.091	1.767	0.997	1.286	1.095	0.738	1.046	0.84	0.91	0.969	0.745	0.674	0.95	0.921	0.81	1.005	0.853	0.999	1.108	0.976	1.071
180	172.472	314.0959662	316.1031271	80.03764617	2.007160976	3910	1	1	0.6	0.360503791	0.6	0.234686838	0.594	0.309551108	0.68	0.283980149	0.692	0.293091743	0.537	0.286831425	0.514	0.582	0.621	0.47275399	0.353	0.473527448	0.53	0.465987414	0.681	0.476641872	0.535	0.335569528	0.644	0.823	0.412	0.502	0.372	0.497	0.374	0.984	0.921	0.7	0.362	0.503	0.787	0.696	1	0.982	0.522
182	173.9630842	396.1200693	398.1268272	162.0617493	2.006757982	15194.554	1	1	0.598	0.422	0.547	0.268	0.409	0.423	0.415	0.441	0.402	0.475	0.347	0.337	0.4	0.435	0.453	0.454	0.218	0.456	0.41	0.421	0.504	0.524	0.589	0.416	0.499	0.542	0.39	0.341	0.321	0.256	0.412	2.272	0.287	0.28	0.449	0.48	0.202	0.197	0.313	0.318	0.234
183	174.9503503	408.1946453	410.2012194	174.1363253	2.006574117	6674.649682	1	1	0.463	0.513	0.454	0.496	0.421	0.301	0.948	0.866	0.504	0.453	1.106	0.987	0.446	0.424	0.961	0.875	0.5	1.019	0.445	0.446	0.795	0.717	0.645	0.593	0.582	0.679	0.565	0.556	0.36	0.389	0.401	0.25	0.645	0.65	0.618	0.456	1.114	1.23	0.53	0.513	0.46
185	175.62	351.1118546	353.1183905	117.0535346	2.006535914	4621.882353	1	1	1.045	1.065	1.609	1.713	0.9	1.045	0.825	0.622	0.74	0.844	0.826	0.584	1.358	1.331	1.181	1.271	1.313	1.239	0.961	0.969	1.074	1.124	1.184	1.14	1.084	0.882	1.275	1.24	1.4	1.569	1.33	0.919	0.832	0.676	0.834	1.326	0.997	1.158	1.33	1.304	0.939
186	176.472	481.1747842	483.1805985	247.1164642	2.005814343	2977	1	1	0.776	0.925	1.544	1.529	1.122	0.81	1.197	0.945	0.584	0.57	0.682	0.463	0.892	0.798	0.813	0.786	0.528	0.596	0.923	1.078	0.812	0.702	0.548	0.625	0.89	0.808	0.572	0.612	1.332	1.131	0.691	0.672	0.925	0.732	0.88	0.709	0.564	0.322	1.786	0.775	0.582
187	177.17056	422.2103819	424.2169068	188.1520619	2.006524885	7742.92	1	1	0.789	1.029	0.54	0.564	0.599	0.552	0.37	0.376	0.869	0.786	1.084	1.063	0.81	1.083	0.767	0.81	0.787	0.546	0.619	0.673	0.791	0.759	0.775	0.763	0.75	0.871	0.471	0.469	0.991	0.9	0.609	0.279	0.67	0.569	0.588	0.736	0.983	1.009	0.869	0.941	0.911
190	178.1828176	529.1480247	531.1546733	295.0897047	2.006648623	5573.959459	1	1	0.337	0.52	0.273	0.331	0.36	0.459	0.279	0.359	0.396	0.464	0.309	0.46	0.378	0.557	0.257	0.389	0.157	0.353	0.297	0.374	0.14	0.152	0.203	0.262	0.361	0.646	0.34	0.464	1.21	1.125	0.429	1.509	0.366	0.324	0.294	0.288	0.17	0.189	0.175	0.186	0.144
191	178.3933691	495.1540976	497.1603842	261.0957776	2.006286627	5408.987331	1	1	0.868	0.769	0.811	0.735	0.919	1.004	0.796	0.804	1.032	0.814	0.746	0.535	0.952	1.285	0.697	0.519	0.619	0.61	0.886	0.823	0.454	0.16	0.415	0.246	0.701	0.997	0.468	0.467	0.577	0.626	0.857	0.836	0.834	0.79	0.611	0.637	0.609	0.841	0.632	0.695	0.542
194	178.932675	424.1174459	426.1240145	190.0591259	2.006568553	48516.5	1	1	0.879	1.022	0.506	0.491	0.412	0.371	0.593	0.571	0.381	0.344	0.493	0.38	0.534	0.642	0.715	0.574	0.526	0.377	0.466	0.533	0.762	0.75	0.676	0.546	0.914	1.136	0.599	0.661	0.678	0.609	0.842	0.55	0.574	0.538	0.51	0.418	0.447	0.466	0.528	0.582	0.913
196	179.8707978	468.1431415	470.1496366	234.0848215	2.006495041	33613.01252	1	1	0.862	1.327	0.982	1.024	0.662	0.769	0.591	0.609	0.712	0.891	0.555	0.608	0.683	0.986	0.718	1.012	0.46	0.67	0.712	0.979	0.629	0.746	0.758	0.888	0.857	1.124	0.56	0.536	0.599	0.65	0.543	0.435	0.696	0.674	0.614	0.732	0.517	0.561	0.626	0.651	0.525
197	180.641	293.1055025	295.1117441	59.04718248	2.006241615	5149	1	1	0.64	0.455	0.329	0.297	0.756	0.801	0.624	0.548	0.473	0.395	6.263	5.018	0.537	0.363	0.339	0.338	0.561	8.699	0.828	0.318	0.11	0.11	4.620226218	0.11	0.958	1.235	0.661	0.769	7.879	7.88	0.914	1.082	0.428	0.709	0.324	0.778	0.743	0.643	0.43	0.397	0.657
199	182.595	274.051104	276.0574602	39.99278399	2.006356222	30992	1	1	0.954	0.773	1.038	0.76	0.826	0.764	0.679	0.56	0.709	0.736	0.703	0.714	0.981	0.99	0.835	0.904	0.635	0.936	0.698	0.804	1.089	1.152	1.009	1.107	1.085	0.862	1.032	0.835	0.996	1.015	0.834	0.656	0.979	0.906	0.843	0.947	0.822	0.84	1.04	1.076	1.08
200	182.724	518.1345573	520.1405477	284.0762373	2.00599037	2436	1	1	0.333	0.401	1.071	0.53	0.821	0.782	0.677	0.540396113	0.607	0.719	0.643	0.616	0.96	0.808	0.695	0.547	0.506	0.613	0.659	0.647	0.698	0.557	0.663	0.755	0.849	0.645	1.085	1.31	1.001	0.793	0.661	0.739	0.916	0.992	1.071	1.033	0.802	0.558	0.736	0.679	0.614
202	184.0829474	502.1388459	504.1451998	268.0805259	2.006353878	27872.62259	1	1	0.1001	0.1001	0.84	0.79	0.1001	0.1001	0.566	0.575	0.1	0.1	0.1001	0.1	0.1	0.1	0.1001	0.1	3.046	0.1	0.1	0.1	0.1001	0.1001	0.1	0.1	0.12	0.132	0.1	0.1	0.1001	0.1	0.1001	0.1001	0.1	0.1	0.1001	0.1001	4.14	4.378	7.549	7.679	3.446
204	184.4286667	366.1006971	368.1063253	132.0423771	2.005628225	9872	1	1	0.44	0.126	0.774	0.739	0.44	0.44	0.655	0.533	0.139	0.171	0.347	0.1	0.44	0.44	0.44	0.38	3.026	0.178	0.44	0.344	0.44	0.1	0.202	0.962	0.173	0.161	1.212	0.209	0.193	0.121	0.44	0.44	0.191	0.635	0.105	0.44	4.148	3.137	8.127	7.961	3.452
207	184.775	496.1387115	498.1456666	262.0803915	2.006955084	3892	1	1	0.757	0.951	0.703	0.662	0.927	0.808	0.551	0.648	0.467	0.674	0.675	1.221	0.911	0.887566649	0.744	0.945	0.441	0.595	0.792	0.988886446	0.884	1.341	0.932	0.954837085	0.837	1.037	0.803	1.034	0.925	0.724	0.74	0.658	0.926	0.939	1.063	0.646	0.441	0.45	0.605	0.506	0.735
208	185.4333191	515.170669	517.1771778	281.112349	2.006508801	19834.42553	1	1	0.648	0.694	0.664	0.594	0.748	0.637	0.609	0.509	0.612	0.737	0.658	0.573	0.786	0.821	0.815	0.763	0.754	0.77	0.626	0.697	0.992	1.055	0.985	0.844	0.977	0.863	0.812	0.806	0.791	0.758	0.552	0.558	0.695	0.654	0.744	0.758	0.685	0.692	0.834	0.824	0.629
210	185.7019167	471.1435984	473.1483812	237.0852784	2.004782792	6656.212121	1	1	2.11	0.997	1.763	2.418	3.43	0.784	0.649	0.613	0.733	2.387	2.787	2.275	4.667	1.317	2.646	0.758	0.541	0.669	0.504	0.729	2.008	1.566	3.937	2.016	3.411	0.852	4.068	2.924	4.757	4.178	0.706	0.822	1.202	1.306	3.776	4.126	0.434	0.419	0.498	0.554	0.454
211	185.728	691.2298556	693.2323847	914.3430711	2.002529115	2734	2	2	0.63	1.33	1.101634388	0.98106425	0.4	1.051	1.04	1.571656923	0.919	1.343564572	1.246	0.95	1.126	1.213	0.801	0.854	1.14	1.458	1.147	1.035080857	1.101634388	1.101634388	0.4	1.101634388	1.009	0.948131806	0.77	0.4	0.908	0.931368624	1.857	0.965	0.4	1.248	0.947	0.91	0.999556386	1.219	0.983886274	1.028	0.4
212	185.7619023	380.1633257	382.1696295	146.1050057	2.006303804	52071.54419	1	1	1.21	0.543	1.905	3.217	3.973	0.508	0.454	0.454	0.507	2.721	3.972	2.412	4.265	0.706	3.922	0.716	0.516	0.519	0.441	0.709	1.519	1.423	1.661	1.182	4.638	0.826	4.634	3.108	6.119	5.044	0.495	0.159	0.973	0.998	3.958	4.782	0.229	0.227	0.333	0.354	0.291
213	185.969	437.1487998	439.1554834	203.0904798	2.006683549	3035.5	1	1	0.737	0.842	1.225	1.115	0.909	0.93	1.041	0.946666867	0.751	0.702	0.919	0.508	1.13	1.287	0.642	0.571550056	0.686	0.92099152	1.066	0.946067278	1.154893124	0.29	0.872839743	0.685	0.847	1.083	0.469	0.385	1.266	1.202	0.814	0.828	1.253	1.241	1.149	0.989	1.118800566	0.555	0.895	0.746	0.853
214	187.7378824	415.1313839	417.1371176	181.0730639	2.005733757	8008.470588	1	1	0.594	0.651	0.553	0.633	0.423	0.39	0.383	0.314	0.199	0.295	0.455	0.392	0.567	0.506	0.348	0.39	0.387	0.425	0.253	0.379	0.347481237	0.248	0.328	0.471	0.415	0.673	0.435	0.624	0.558	0.726	0.455	0.281	0.482	0.419	0.473	0.545	0.61	0.518	0.492	0.437	0.41
215	188.4848413	456.1255427	458.1318162	222.0672227	2.006273523	8886.825397	1	1	0.579	0.472	0.46	0.381	0.658	0.643	0.58	0.604	0.846	0.723	0.883	0.83	0.731	0.996	0.627	0.637	0.24	0.538	1.014	0.95	0.477	0.326	0.396	0.375	0.53	0.729	0.545	0.762	0.35	0.361	0.77	0.626	1.648	1.541	1.361	0.463	0.21	0.209	0.161	0.198	0.255
216	190.914	407.1387626	409.1451438	173.0804426	2.006381213	6828	1	1	1.085	1.040399209	1.109	1.062	1.189	1.036	1.023	1.019	0.815	0.973	0.886	1.067008851	1.213	1.679	1.1	0.768	1.102	1.296677546	1.235	1.332175127	0.746	0.863895352	0.821	0.937	1.237	1.341	0.71	1.005	1.166	1.018	1.005	0.944	1.483	1.305	1.551	0.856	0.875	1.13	1.456	1.241	1.081
217	192.3836291	366.1112833	368.1179143	132.0529633	2.006630964	3664903.54	1	1	0.731	0.811	0.655	0.609	0.953	0.917	0.907	0.849	0.726	0.648	0.837	0.793	0.857	0.942	0.854	0.848	0.8	0.824	0.863	0.919	0.788	0.801	0.695	0.713	0.958	1.138	0.746	0.794	0.502	0.491	0.844	0.541	0.917	0.912	0.825	0.73	0.631	0.614	1.018	1.013	0.832
218	193.9503958	414.1217217	416.1282412	180.0634017	2.006519419	297409.625	1	1	0.565	0.258	0.588	0.401	0.721	0.323	0.404	0.256	0.444	0.505	0.696	0.445	0.884	0.435	0.74	0.351	0.399	0.324	0.45	0.475433739	0.69	0.543	0.873	0.483	0.916	0.498	0.843	0.662	2.402	1.739	0.506	0.873	0.318	0.445	0.788	0.906	0.359	0.425	0.431	0.651	0.312
219	196.0503443	422.1851952	424.1917597	188.1268752	2.006564502	28663.14151	1	1	0.481	0.579	1.066	1.111	0.639	0.587	0.597	0.611	0.819	0.762	0.697	0.656	0.523	0.604	0.874	0.935	0.638	1.136	0.62	0.612	0.633	0.678	0.464	0.409	0.853	1.126	0.818	0.972	0.492	0.512	0.909	0.45	0.839	0.825	0.728	0.516	0.925	0.936	0.826	0.726	1.201
220	196.2104709	468.1431273	470.1496443	234.0848073	2.006516979	31539.37209	1	1	0.83	0.665	0.937	0.798	0.638	0.575	0.584	0.404	0.684	0.376	0.562	0.367	0.688	0.721	0.705	0.425	0.45	0.301	0.677	0.576	0.593	0.199	0.737	0.171	0.842	1.058	0.562	0.576	0.595	0.616	0.529	0.417	0.665	0.661	0.607	0.738	0.513	0.554	0.619	0.653	0.526
221	196.846317	414.119047	416.1256355	180.060727	2.006588597	301025.2143	1	1	0.554	0.263	0.582	0.4	0.742	0.326	0.398	0.26	0.438	0.499	0.692	0.455	0.884	0.442	0.728	0.343	0.418	0.351	0.443	0.374	0.696	0.548	0.872	0.512	0.909	0.488	0.852	0.671	2.448	1.798	0.5	0.871	0.348	0.34	0.786	0.906	0.347	0.328	0.434	0.438	0.319
222	196.954	718.7606947	720.768928	969.4047493	2.008233329	1192	2	2	1.392	1.141	1.416	2.528686765	2.186	1.086	2.095	2.905976855	2.054	2.630054017	1.496	1.48348226	2.344	1.332	2.21	2.678094112	1.422	2.109431343	2.067	1.940154271	1.731	1.240742158	1.825	1.637866889	2.13	3.458920684	2.242	0.64	3.59	2.261	1.307	2.013	1.334	9.99	2.627	2.479	1.5	7.33	1.28	1.161	1.158
224	198.8463662	454.1274469	456.1337767	220.0691269	2.006329852	5789.43662	1	1	0.416	0.463	0.773	0.874	1.343	1.271	1.015	1.069	1.222	1.135	0.625	0.571	0.953	1.308	0.483	0.381	0.106	0.604	0.934	1.078	0.187	0.236	0.318	0.379	1.11	1.368	1.168	1.399	0.74	0.849	0.815	0.784	1.024	1.211	1.03	0.974	0.519	0.624	1.125	1.433	0.173
225	198.9249091	558.1634237	560.1699764	324.1051037	2.006552701	3385.787879	1	1	0.779	0.952	0.34	0.312	2.588	1.797	0.831	0.692	1.412	1.392	0.413	0.37	1.179	1.121	0.382	0.373	0.741	0.484	0.676	0.624	2.016	1.872	2.269	2.005908158	0.507	0.787	0.688	0.921	1.22	1.226	0.424	0.741	0.659	0.77	0.656	0.702	0.437	0.686	0.245	0.258	0.242
231	200.762875	553.1830333	555.1891251	319.1247133	2.006091838	2973.5	1	1	0.552	0.432	0.69	0.634	0.728	0.459	0.499	0.359	0.512	0.488	0.678	0.447	0.881	0.528	0.789	0.423	0.463	0.413	0.577	0.43	0.731	0.474	0.856	0.43	0.913	0.586	0.925	0.78	2.211	1.651	0.53	0.839	0.42	0.462	0.758	0.889	0.523	0.45	0.458	0.557	0.453
232	201.1883846	567.1745717	569.1809583	333.1162517	2.006386567	3435.692308	1	1	0.687	0.749	0.375	0.467	0.63	0.705	0.474	0.554	0.764	0.601	0.582	0.379	0.387	0.417	0.432	0.329	0.488	0.287	0.655	0.514	0.76	0.76	0.946949259	0.424	0.764	0.788	0.711	0.505	0.75	0.767	0.443	0.452	0.382	0.252	0.358	0.725	0.515	0.547	0.451	0.342	0.361
233	201.519	539.1806805	541.1868277	305.1223605	2.006147178	2893.52381	1	1	1.347	1.650965273	0.562	0.41	0.17	0.17	0.871	0.808	0.651928325	0.790635715	1.086	2.429388256	0.655759107	0.17	1.854	1.471925825	1.169	1.642849394	1.224	0.17	0.873022042	0.98656392	1.215167413	0.17	1.745	1.04	1.686	0.17	1.36	1.089	1.354	2.085	0.773	0.546	0.864	1.018077982	1.357	1.434	1.725	1.612	1.356
234	201.7996667	694.1046707	696.1123479	460.0463507	2.007677134	4130	1	1	0.189	0.352	0.211	0.229	0.234	0.222211428	0.244	0.255	0.224	0.216	0.196	0.196	0.322	0.423	0.203	0.296	0.504	0.267	0.204	0.1	0.221	0.283	0.225	0.278	0.292	0.342	0.207	0.237	0.29	0.263	0.295	0.282	0.236	0.23	0.233	0.23	0.314	0.338	0.225	0.264431422	0.204
235	201.8764783	347.0552266	349.0612203	225.9938132	2.005993676	2721.826087	2	2	1.187	1.557321995	1.066	1.581	1.33	1.239	1.282	1.276	1.539	1.684	1.071	1.019	1.85	2.357	0.993	1.681616055	2.436	2.177959645	1.104	1.107205529	1.263	1.017	1.501	1.964	1.368	1.784	1.429	1.272	1.25	1.343	1.743	1.412	1.389	1.279	1.27	1.113	1.643	2.222	1.642	1.126	1.337
238	202.8525339	471.1428646	473.1489438	237.0845446	2.006079186	13082.9322	1	1	2.09	0.828	1.848	1.337	3.382	0.797	0.628	0.554	0.753	1.381	2.768	0.75	4.563	1.202	2.826	0.541	0.562	0.777	0.46	0.451	2.046	1.358	3.998	1.456	3.293	0.712	4.013	1.481	4.742	3.87	0.754	0.902	1.169	1.25	3.751	3.956	0.432	0.426	0.502	0.554	0.422
240	203.238	404.1268971	406.1340201	170.0685771	2.007123017	2210	1	1	1.324	1.104	0.963	1.115	1.18	1.641	0.199379759	0.3	1.101	1.161	1.691	1.311	0.799	0.674	0.645	0.5	1.845	1.518	1.3	0.976	0.465	0.396879262	0.708	0.76	0.551	0.535	0.211646448	0.3	0.147710988	0.217064538	0.553	0.231508066	0.643	0.48	0.709	1.052	2.613	2.612	0.55738645	0.543	1.128
241	203.5865714	576.1744627	578.1812756	342.1161427	2.006812889	2290.571429	1	1	0.467	0.689	0.143	0.249411041	6.886	1.909	0.351	0.499	0.674	1.244	0.325	0.687	0.713	0.725356602	0.388	0.470601459	0.512	0.612	0.684	0.622	0.867	1.416	0.927	1.315	0.412	0.503	0.491	0.669	0.86	0.874	0.433	0.411	0.407	0.378	0.4	0.44	0.513	0.796	0.113	0.255	0.163
242	203.6899091	363.0676598	365.074342	258.0186795	2.006682186	2710.848485	2	2	0.635	0.788	0.708	0.802	0.582	0.579	0.541	0.501	0.807	0.478	0.54	0.724	0.699	0.803	0.793	0.608	0.797	0.908	0.786	0.705	0.941	0.819	0.882	0.843	0.8	0.793	0.768	0.807	0.673	0.602	0.609	0.617	0.525	0.506	0.549	0.779	0.773	0.571	0.582	0.887	0.784
244	204.1715887	436.2008262	438.2074385	202.1425062	2.006612313	8795.451613	1	1	0.537	0.524	0.721	0.721	0.753	0.732	0.678	0.658	0.759	0.673	0.541	0.472	0.642	0.721	0.869	0.759	0.666	0.665	0.661	0.617	0.999	0.827	0.912	0.828	0.73	0.808	0.828	0.765	0.603	0.61	0.787	0.371	0.869	0.872	0.749	0.582	0.736	0.689	0.8	0.763	0.627
245	204.2	414.1185125	416.1251112	180.0601925	2.006598689	574928	1	1	0.554	0.265	0.593	0.403	0.737	0.332	0.41	0.268	0.421	0.497	0.674	0.463	0.867	0.45	0.731	0.349	0.441	0.364	0.456	0.394	0.681	0.555	0.876	0.533	0.925	0.485	0.862	0.671	2.422	1.867	0.536	0.884	0.341	0.324	0.751	0.899	0.37	0.317	0.406	0.426	0.323
247	206.3972256	397.1422791	399.1488447	163.0839591	2.006565619	10691.39024	1	1	0.381	0.414	0.633	0.641	0.757	0.582	0.719	0.619	0.748	0.606	0.379	0.257	0.678	0.499	0.926	0.596	0.775	0.81	1.069	1.016	0.861	0.893	0.744	0.723	0.902	0.914	1.085	1.144	0.249	0.216	0.659	0.625	0.644	0.713	0.712	0.597	0.389	0.42	0.863	0.889	0.456
249	207.5591667	535.1855721	537.1924481	301.1272521	2.006876015	2395.333333	1	1	0.901	1.041	0.631	0.779	0.705	0.566	0.433	0.522	0.605	0.579	0.773	0.714	0.439	0.624	0.842	0.787	1.335	0.908	0.429	0.506	0.581	0.573	0.621	0.86863707	1.05	0.908	0.748	0.785	2.258	2.188	0.541	0.504	0.56	0.607	0.594	0.528	1.075	0.993	0.703	0.674	0.83
250	208.2697143	440.1487664	442.1553275	206.0904464	2.006561122	13724.09524	1	1	0.714	0.586	1.565	1.362	0.725	0.635	1.225	1.21	0.821	0.643	0.707	0.558	0.899	0.877	0.661	0.561	0.524	0.697	1.237	1.039	0.1	0.112	0.333	0.407	1.64	1.569	0.625	0.642	1.028	0.988	0.772	0.774	1.219	1.245	1.198	0.969	0.842	0.943	0.306	0.271	0.342
252	212.471	380.3166737	382.3249689	146.2583537	2.008295182	377468	1	1	0.954	9.99	0.9	0.891508169	0.867	0.933175899	0.888	0.900649457	0.88	0.853149461	0.812	0.835017676	0.849	0.93126851	0.941	1.006197362	0.924	0.995542268	0.953	1.04176267	0.976	1.054030742	0.957	1.016242332	0.88	0.887316992	0.791	0.763209778	0.757	0.702	0.974	0.717	0.931	0.905	0.919	0.925	1.007	0.918	1.128	1.07	0.826
253	212.8986299	380.1269611	382.1337013	146.0686411	2.006740127	17858260.55	1	1	0.825	0.992	0.784	0.82	0.817	0.878	0.765	0.88	0.749	0.886	0.68	0.77	0.747	0.805	0.897	1.04	0.9	1.05	0.904	0.932	0.98	0.948	0.928	0.9	0.753	0.845	0.56	0.6	0.576	0.561	0.844	0.514	0.894	0.864	0.805	0.846	0.935	0.951	1.154	1.122	0.799
254	213.8410455	380.5953178	382.6034589	146.5369978	2.00814116	1134419.273	1	1	0.826	0.91	0.772	0.72	0.736	0.777	0.738	0.649367114	0.77	0.631850099	0.697	0.646742472	0.775	0.72456069	0.849	0.831834432	0.869	0.848390076	0.912	0.819	0.986	0.911613087	0.917	0.849355031	0.705	0.863	0.48	0.6	0.518	0.531	0.799	0.42	0.807	0.865	0.756	0.772	0.933	0.965	1.152	1.142	0.712
256	218.814	321.0900889	323.0966213	87.03176894	2.006532362	85199.23077	1	1	0.525	0.512	0.545	0.515	0.707	0.619	1.96	1.629	0.685	0.558	0.997	0.924	0.683	0.691	2.132	1.943	0.526	0.369	1.163	1.165	1.146	1.035	0.77	0.746	1.197	1.372	0.593	0.599	0.42	0.438	1.477	1.258	0.799	0.763	0.733	0.815	0.442	0.391	0.924	0.987	1.47
259	220.9656667	317.1315818	319.136405	83.07326184	2.00482315	6778	1	1	0.959	0.846	1.025	0.844	0.961	0.854	0.904	0.838	0.928	0.896	0.962	0.867	0.99	0.818	0.944	0.807	0.974	0.815	0.962	0.854	0.922	0.815	0.947	0.838	0.892	0.844	0.971	0.883	0.909	0.938	0.85	0.91	0.884	0.867	0.92	0.852	0.859	0.825	0.863	0.797	0.926
260	221.2680874	438.1324746	440.139061	204.0741546	2.006586399	114383.6214	1	1	1.013	1.585	0.854	1.093	0.719	0.647	0.57	0.486	1.021	1.018	0.614	0.541	0.857	1.116	0.696	0.982	0.487	0.687	0.641	0.728	0.577	0.815	0.973	1.326	0.788	0.929	0.511	0.524	0.488	0.489	0.593	0.473	0.755	0.708	0.677	0.907	0.906	0.919	0.658	0.666	0.499
261	221.3027143	364.1446939	366.1505584	130.0863739	2.00586452	6464.190476	1	1	0.396	0.604	0.449	0.559	0.239	0.318	0.24	0.296	0.12	0.347	0.327	0.414	0.437	0.384	0.364	0.414	0.503	0.336	0.26	0.407	0.12	0.201912686	0.29	0.481	0.259	0.518	0.279	0.534	0.46	0.53	0.365	0.174	0.333	0.331	0.35	0.368	0.512	0.54	0.44	0.441	0.415
262	221.6321362	482.1586815	484.1652139	248.1003615	2.006532332	21251.37089	1	1	0.801	0.863	0.886	0.979	0.878	0.676	0.597	0.53	1.049	0.995	0.779	0.769	0.866	0.701	0.754	0.865	0.614	0.609	0.721	0.843	0.522	0.578	0.575	0.591	0.884	1.029	0.507	0.402	0.539	0.53	0.578	0.429	1.32	1.469	1.321	0.745	0.522	0.49	0.612	0.577	0.481
263	221.7	385.0891433	387.0951084	151.0308233	2.005965101	16960	1	1	0.466	0.471	0.499	0.513	0.611	0.595	1.736	1.672102867	0.615	0.583	0.937	0.852278134	0.617	0.627	1.847	1.686402632	0.491	0.288	1.077	0.784	1.073	1.028247704	0.744	0.72	1.205	1.23	0.542	0.511	0.374	0.356	1.464	1.13	0.784	0.714	0.686	0.819	0.356	0.364	0.918	0.832	1.445
264	222.1716338	510.1898807	512.1961642	276.1315607	2.00628353	18439.55869	1	1	1.965	0.928	2.175	2.201	2.827	0.854	0.534	0.66	0.669	2.233	2.181	1.616	2.574	0.876	2.516	0.952	0.397	0.681	0.596	1.218	1.652	1.848	1.557	1.32	2.126	0.687	2.874	2.318	4.086	2.602	0.564	1.99	1.134	1.105	2.84	3.572	0.229	0.215	0.21	0.222	0.202
265	222.2084286	417.1223908	419.1282207	183.0640708	2.005829961	7030.285714	1	1	0.577	0.351	0.442	0.275	0.254	0.244	0.213	0.232	0.209	0.222	0.228	0.205	0.273	0.25	0.185	0.215	0.206	0.232	0.229	0.224	0.21	0.235	0.246	0.243	0.182	0.296	0.133	0.189	0.161	0.174	0.203	0.557	0.35	0.326	0.195	0.255	0.267	0.314	0.284	0.36	0.208712856
266	222.34228	594.2083803	596.2148504	360.1500603	2.006470116	7986.88	1	1	0.651	0.592	0.582	0.496	0.59	0.497	0.574	0.464	0.58	0.506	0.586	0.452	0.661	0.673	0.617	0.589	0.674	0.654	0.69	0.579	0.978	0.801	0.998	0.952	0.726	0.745	0.666	0.732	2.544	2.05	0.632	0.696	0.543	0.523	0.486	0.611	0.653	0.617	0.868	0.799	0.659
267	222.5059581	455.1478153	457.1543146	221.0894953	2.006499355	103603.3116	1	1	0.55	0.598	0.582	0.506	0.571	0.481	0.539	0.413	0.568	0.441	0.557	0.467	0.719	0.69	0.626	0.553	0.616	0.607	0.686	0.578	0.952	0.814	0.989	0.83	0.78	0.777	0.668	0.751	2.557	2.166	0.688	0.691	0.537	0.533	0.508	0.693	0.64	0.639	0.834	0.802	0.665
268	223.0441628	396.1106462	398.1169271	162.0523262	2.006280885	23501.93023	1	1	0.682	0.582	0.628	0.509	1.069	0.56	0.585	0.435	0.606	0.539	0.617	0.447	0.782	0.667	0.611	0.608	0.707	0.66	0.631	0.687	0.992	0.875	0.988	0.878	0.816	0.782	0.771	0.774	2.503	2.19	0.675	0.85	0.516	0.586	0.627	0.75	0.675	0.613	0.828	0.8	0.678
270	223.5747302	409.153516	411.1601039	175.095196	2.006587867	1213341.479	1	1	0.847	0.948	0.675	0.632	0.743	0.694	0.604	0.561	0.669	0.611	0.805	0.764	0.598	0.621	0.952	0.908	0.87	0.802	0.923	0.964	0.938	0.936	0.938	0.883	0.525	0.605	0.823	0.876	0.734	0.713	0.687	0.36	0.926	0.925	0.868	0.702	1.052	1.075	0.763	0.759	0.703
271	223.729	693.1025761	697.1152409	225.9932361	4.012664743	2506.8	1	2	1.242	1.72	1.189	1.197	1.302	1.546	1.44	0.714	1.404	1.572	1.032	1.238	2.176	2.59	1.24	1.49	3.141	1.257	1.207	1.242	1.173	1.397	1.599	1.705	1.734	2.391	1.316	1.514	1.423	1.572	1.991	1.514	1.322	1.296	1.25	1.262	1.787	2.006	1.511	1.511	1.289
272	225.1985127	510.1534126	512.1598115	276.0950926	2.006398914	12618.51457	1	1	0.759	0.93	0.903	0.914	1.006	0.906	0.749	0.635	1.056	0.883	1.008	0.867	1.568	1.649	0.659	0.626	0.117	0.656	0.801	1	0.213	0.189	0.354	0.278	1.085	1.247	0.89	0.886	1.091	1.005	1.028	0.954	1.03	1.028	0.96	0.746	0.222	0.229	0.125	0.124	0.14
274	226.317	318.0763578	320.0851725	84.01803781	2.008814657	4141	1	1	0.594	0.709	1.274	0.63	0.705	0.517	0.669	0.491	0.607	0.5	0.651	0.541	0.918	0.765	0.746	0.586	0.816	0.747	0.841	0.698	1.121	0.859	1.144	0.947	0.967	0.92	0.74	0.829	3.06	2.442	0.81	0.765	0.669	0.599	0.61	0.812	1.124	0.717	0.942	0.917	0.808
275	227.1837143	477.1305577	479.1370649	243.0722377	2.006507116	5245	1	1	0.563	0.589	0.617	0.472	0.593	0.533	0.553	0.474	0.618	0.493	0.577	0.497	0.678	0.664	0.598	0.544	0.622	0.657	0.683	0.762	0.987	0.658	0.994	0.893	0.769	0.822	0.721	0.763	2.495	2.082	0.673	0.633	0.531	0.533	0.524	0.701	0.612	0.594	0.8	0.795	0.699
279	231.0505111	576.1741149	578.1806457	342.1157949	2.006530787	14519.64444	1	1	0.258	0.224	0.107	0.1	9.99	1.909143656	0.1	0.1	0.147	0.119	0.125	0.1	0.404	0.1	0.13	0.1001	0.713	0.1	0.915	0.1	0.11	0.144	0.165	0.1	0.1	0.1	0.1	0.1	0.196	0.188	0.1	0.254	0.151	0.204	0.244	0.1	0.147	0.392	0.1	0.131	0.1
280	231.97	647.7123513	649.7150941	413.6540313	2.00274281	1874	1	1	1.147	1.39	1.047	1.466	1.175	1.148	1.048	1.737	1.091	1.305	1.101	1.404	1.133	1.512	1.209	1.34	1.384	1.41	0.993	6.4	0.982	1.209	1.068	1.451	0.941	1.382	1.085	1.251	1.279	1.427	1.007	1.32	1.047	1.225	1.115	1.273	1.176	9.99	1.202	1.487	1.241
282	232.901	461.1042766	463.1108743	227.0459566	2.006597705	2702	1	1	1	0.551	0.84	0.369	0.527	0.427	0.777	0.368	0.534	0.374	0.41	0.356	0.52	0.511	0.465	0.53	0.747	0.496	0.807	0.428	0.865	0.474	0.716	0.499	0.35	0.337	0.486	0.447	0.287	0.356	0.722	0.208	0.666	0.637	0.459	0.525	0.516	0.498	1.625	1.549	0.891
283	233.337	422.1362226	424.1435148	188.0779026	2.007292201	2332	1	1	1.703	2.085	0.896	0.84	0.807	0.773	0.377	0.459	0.856	0.66	1.288	1.234	0.771	0.815	0.938	0.952	1.463	1.01	0.893	0.981	0.817	0.729	0.759	0.674	0.642	0.682	0.592	0.546	1.501	1.412	0.582	0.57	0.647	0.6	0.555	0.874	2.025	2.108	0.597	0.474	0.845
284	233.4686892	399.1036967	401.1101586	165.0453767	2.00646198	179965.4865	1	1	0.662	0.745	0.639	0.635	0.524	0.578	0.456	0.42	0.464	0.461	0.571	0.553	0.691	0.715	0.655	0.702	0.704	0.549	0.547	0.624	0.55	0.572	0.513	0.621	0.565	0.711	0.504	0.639	0.42	0.445	0.57	0.33	0.6	0.646	0.574	0.594	0.704	0.686	0.839	0.803	0.587
286	233.935	576.1136344	578.119094	342.0553144	2.005459579	2080	1	1	0.62	0.62	0.62	0.62	0.522	0.914	0.644	0.705	1.386	1.538	0.929	0.666	0.715	0.619	1.124	0.873	0.607	0.816	0.891	1.045	1.176	1.583	0.54	0.606796659	0.531	0.62	1.035	1.929	0.873	0.738	0.797	0.458	0.62	0.227	0.62	0.553	0.62	0.333	0.799	0.903	0.824
288	234.4955	492.1439497	494.149369	258.0856297	2.005419321	2190	1	1	0.732	0.661	0.859	0.666	0.729	0.567	0.761	0.925	0.468	0.526	1.025	0.616	0.971	0.713	0.714	0.576484856	0.72	0.832	0.876	0.869	0.703	0.746	0.845	0.719	1.157	1.316	0.819	0.759	0.621	0.782	0.7	0.571	0.772	0.674	0.829	1.487	0.691	0.63	0.639	0.977	0.613
289	234.941	496.138881	498.1456521	262.080561	2.006771125	3316	1	1	0.435	0.514	0.496	0.287	0.974	1.207	0.511	0.364846122	0.801	0.66	0.577	0.558	1.086	0.98	0.416	0.517310674	0.334	0.639	0.634	0.684	0.451	0.1001	0.532	0.363	0.43	0.592	0.991	1.193	0.377	0.339	0.588	0.728	1.259	1.025	1.081	0.381	0.1001	0.275	0.467	0.237	0.1001
290	235.028	734.2451011	736.2516703	500.1867811	2.006569229	2838	1	1	0.594	0.6	0.6	0.6	0.661	0.6	0.6	0.766807774	0.778	0.6	0.511	0.6	0.736	0.524	0.675	0.342646522	0.6	0.475	0.6	0.75	0.698	0.518	0.926	0.468998708	0.737	0.548	0.807	0.602304257	2.152	1.431	0.539	0.736	0.6	0.483	0.695	0.951	0.6	0.405	0.6	0.643	0.766807774
294	236.04975	694.1039029	696.1110882	460.0455829	2.007185301	3686	1	1	0.179	0.335	0.335	0.235	0.25	0.28	0.259	0.271	0.234	0.236	0.186	0.325	0.328	0.413	0.209	0.306	0.498	0.269	0.207	0.228	0.227	0.294	0.228	0.231	0.272	0.273	0.217	0.341	0.256	0.263	0.307	0.28	0.338	0.22	0.224	0.234	0.365	0.328	0.282	0.264	0.227
299	237.1	396.1212499	398.1281496	162.0629299	2.006899663	6180	1	1	0.561	1.022	0.739	0.98	0.792	1.099	0.821	1.119	0.404	0.4	0.564	0.656	0.96	1.289	0.334	0.272	0.183	0.697	0.683	0.775	0.415	0.467	0.403	0.455	0.526	0.831	0.362	0.473	1.212	1.156	0.411	0.317	1.029	0.901	0.832	0.402	0.231	0.195	0.223	0.269	0.263
300	237.3953568	388.1068913	390.1134588	154.0485713	2.006567484	22416.47887	1	1	0.282	0.309	1.069	1.166	0.913	0.728	1.152	1.067	0.676	0.745	0.694	0.623	1.131	1.07	0.582	0.526	0.601	0.541	0.709	0.828	0.479	0.509	0.629	0.504	1.048	1.077	1.356	1.652	0.557	0.705	0.808	0.594	0.922	1.083	1.133	0.469	0.599	0.598	0.579	0.635	0.345
301	237.576	640.2288013	642.2343847	812.3409625	2.00558344	2382	2	2	1.062	1.379	0.903	1.273	1.105	1.123	0.997	1.368	0.955	1.242	0.806	1.445	0.846	1.337	0.901	1.166	0.913	1.085	0.883	0.62	0.946	1.003	0.98	1.099	0.987	1.387	0.832	1.039	0.905	1.277	1.446	1.31	0.965	1.618	0.947	0.854	1.003	1.108	0.969	1.136	0.79
302	237.5760625	504.1413151	506.1479977	270.0829951	2.006682608	6242.375	1	1	0.359	0.376	0.421	0.449	0.747	0.652	0.657	0.559	0.491	0.531	0.571	0.573	0.609	0.604	0.728	0.618	0.644	0.744	0.73	0.735	0.501	0.537	0.627	0.615	0.749	0.819	0.578	0.655	0.818	0.914	0.5	0.454	0.663	0.627	0.758	0.806	0.579	0.515	0.766	0.806	0.52
303	237.6321429	647.7126768	649.7153876	827.3087137	2.002710813	2315.428571	2	2	1.147	1.39	1.047	1.466	1.175	1.148	1.048	1.539	1.091	1.305	1.101	1.404	1.133	1.648	1.209	1.269	1.384	1.382	0.993	6.4	0.982	1.209	1.068	1.451	0.941	1.382	1.085	1.251	1.279	1.265	1.007	1.32	1.047	1.225	1.115	1.273	1.176	9.99	1.202	1.555	1.241
305	238.125	639.7270867	641.7335945	811.3375334	2.006507781	6486	2	2	1.962	2.913	1.926	2.728	2.023	2.472	1.934	2.354	2.222	2.752	1.952	2.98	1.856	2.41	2.037	2.458	1.786	2.506	1.81	1.753	1.898	2.125	1.744	2.684	1.893	2.449	2.045	2.388	2.025	2.585	2.719	2.631	1.869	2.272	2.012	1.898	2.061	2.992	1.929	2.427	2.053
306	238.1255	639.7268796	641.7336554	405.6685596	2.0067758	6034	1	1	1.962	2.913	1.926	2.728	2.023	2.472	1.934	2.586	2.222	2.752	1.952	2.749	1.856	2.41	2.037	2.458	1.786	2.506	1.81	1.753	1.898	2.125	1.744	2.684	1.893	2.449	2.045	2.388	2.025	2.585	2.719	2.631	1.869	2.272	2.012	1.898	2.061	2.992	1.929	2.427	2.053
307	239.088	661.2276758	663.2327449	427.1693558	2.005069087	2604	1	1	0.596	0.464	0.495	0.556	0.585	0.652	0.642	1.014	0.725	0.91	0.652	0.523	0.876	0.771	0.588	0.561	0.363	0.711	0.627	0.492	0.762	0.709	0.828	0.792	0.803	0.904	0.887	0.961	0.668	0.53	0.791	0.542	0.795	0.62	0.747	0.658	0.535	0.573	0.658	0.765	0.648
312	239.4476522	553.1825335	555.1886751	319.1242135	2.006141624	3264.652174	1	1	0.56	0.528	0.685	0.499	0.767	0.372	0.494	0.438	0.512	0.666	0.693	0.54	0.952	0.495	0.707	0.503	0.487	0.57	0.55	0.509	0.757	0.664	0.875	0.654	0.884	0.659	0.91	0.632	2.203	1.621	0.53	0.866	0.435	0.512	0.743	0.902	0.415	0.456	0.504	0.65	0.379
313	239.51195	414.12114	416.1276937	180.06282	2.006553701	598247.2375	1	1	0.51	0.288	0.563	0.346	0.654	0.353	0.465	0.296	0.512	0.43	0.618	0.473	0.742	0.492	0.645	0.375	0.525	0.389	0.549	0.449	0.755	0.558	0.896	0.564	0.783	0.616	0.726	0.629	2.497	2.008	0.595	0.724	0.414	0.422	0.655	0.756	0.478	0.443	0.578	0.593	0.451
315	240.9754865	307.1214808	309.1281953	73.06316082	2.006714475	6268.702703	1	1	1.086	0.629	0.794	0.489	0.757	0.535	0.591	0.642	0.434	0.804	0.812	0.97	0.781	0.678	0.999	0.873	0.734	1.327	0.698	0.762	0.987	1.057	1.163	0.845	0.9	1.021	0.8	0.93	0.756	0.784	0.692	1.674	0.678	0.625	0.752	0.849	0.868	0.7	0.854	0.811	0.643
316	241.0311942	438.132534	440.1390877	204.074214	2.006553737	96484	1	1	1.013	0.564	0.823	0.363	0.718	0.633	0.575	0.585	1.016	0.74	0.612	0.46	0.864	0.682	0.696	0.202	0.485	0.313	0.641	0.533	0.589	0.1	0.995	0.208	0.78	0.868	0.516	0.56	0.49	0.465	0.599	0.472	0.741	0.689	0.657	0.907	0.927	0.933	0.655	0.672	0.494
318	242.4238889	551.1803766	553.1827328	317.1220566	2.002356211	4462.666667	1	1	1.32484675	1.276	1.638732412	1.724	0.882	1.129373312	0.501775853	0.62	0.681	1.14	0.821	1.469471827	0.887	1.22	1.187	0.806472454	0.62	0.999186426	0.62	0.391299043	2.032577925	1.250258048	0.478	1.045	0.975	0.93100389	0.781	0.909	0.322	0.356	0.62	0.62	0.62	0.811671415	0.888	1.018	0.769753819	0.528	0.62	0.546	0.62
321	243.0150588	272.0342417	274.0385338	37.97592167	2.00429218	59341.76471	1	1	3.674	2.18	3.742	2.719	2.761	2.319	2.21	1.883	2.331	1.835	1.948	1.788	3.714	2.914	3.286	3.109	2.164	3.52	2.844	3.092	4.299	4.762	4.164	4.33	3.604	3.685	3.501	3.02	3.602	2.816	2.584	1.531257283	2.86	2.622	3.009	3.5	1.933	1.645	3.709	3.187	2.715
322	243.037	302.0249067	304.0287626	67.96658672	2.003855915	4746	1	1	5.936988544	9.99	9.99	1.888648676	4.25	9.99	4.379	9.99	4.690081244	9.99	4.776403041	9.99	9.99	9.99	4.249767907	9.99	5.07	9.99	3.85331874	1.51	9.99	9.99	9.99	9.99	9.99	9.99	9.99	9.99	4.694261011	4.993	3.522	3.003	4.803	9.99	4.12136371	9.99	3.685	4.575	9.99	9.99	4.655
323	243.192	270.0340557	272.038918	35.97573565	2.004862388	26684	1	1	2.857	2.142155518	5.141766792	0.776	3.425	1.703936731	2.265	2.338665797	3.703441158	2.757997631	3.745708298	1.853117776	2.003969095	2.6430278	2.740835325	1.188	2.327	0.967814161	2.694	3.252044749	1.411535113	2.032689458	0.580501721	1.896242362	0.743337164	2.616510983	3.64367595	2.305482113	3.531949796	2.556	4.56	3.996	3.987	4.197	3.55	2.816984141	3.487	3.118	3.162	1.519089898	2.59
324	243.5159626	398.1261274	400.1327897	164.0678074	2.006662296	48779.64706	1	1	1.28	1.121	1.35	1.028	1.795	1.401	0.831	0.59	1.072	0.927	1.489	1.128	0.996	0.786	1.397	1.119	1.203	1.096	1.134	1.05	1.74	1.354	1.391	1.169	1.595	1.389	1.411	1.522	0.343	0.1	0.709	0.69	1.474	1.52	1.788	1.501	1.215	1.155	1.839	1.85	1.777
325	244.8226209	414.1212615	416.1278567	180.0629415	2.00659514	1236984.929	1	1	0.501	0.277	0.568	0.33	0.653	0.338	0.472	0.263	0.526	0.422	0.582	0.352	0.72	0.457	0.644	0.321	0.52	0.371	0.562	0.39	0.788	0.541	0.901	0.508	0.778	0.536	0.656	0.585	2.524	2.029	0.602	0.723	0.426	0.452	0.625	0.702	0.496	0.494	0.629	0.646	0.457
326	245.2565	292.5332559	294.5403891	116.9498718	2.007133176	3915	2	2	1.079	1.154	1.106	0.783	0.835	0.966	0.884	0.944174429	0.779	1.019	0.906	0.875	0.982	1.166	0.917	0.905	0.826	0.937	0.851	0.983055839	0.836	1.082	0.983	1.094	0.878	1.052	0.819	1.024	0.764	0.969	0.853	1.378	0.952	1.032	0.785	0.907	0.863	0.907	0.995	1.055	0.939
327	245.6714286	683.1492183	685.154159	449.0908983	2.004940725	13487.42857	1	1	0.55	0.55	0.55	0.55	0.434	0.55	0.55	0.55	0.55	0.55	0.524	0.55	0.556	0.421	0.55	0.55	0.55	0.329	0.476	0.294	0.433	0.430829705	0.677	0.55	0.485	0.55	0.426	0.55	1.131	0.786	0.424	0.55	0.55	0.245	0.462	0.529	0.428	0.374	0.55	0.688	0.55
328	245.7865	317.1305977	319.1371362	83.07227772	2.006538449	6186	1	1	0.945	0.919	0.953	0.768	0.92	0.846	0.92	0.841	0.912	0.861	0.971	0.854	0.983	0.787	0.958	0.791	0.945	0.842	0.957	0.846	0.948	0.843	0.958	0.825	0.939	0.869	0.931	0.897	0.897	0.885	0.845	0.818	0.869	0.803	0.869	0.859	0.874	0.828	0.859	0.81	0.916
330	246.8608182	414.1216412	416.1282569	180.0633212	2.006615696	2182406.182	1	1	0.5	0.251	0.571	0.26	0.638	0.316	0.468	0.263	0.525	0.372	0.576	0.352	0.676	0.415	0.626	0.321	0.522	0.346	0.561	0.36	0.781	0.508	0.892	0.493	0.777	0.522	0.642	0.512	2.506	2.03	0.603	0.721	0.428	0.451	0.614	0.687	0.5	0.501	0.628	0.649	0.468
331	247.306	753.1637878	755.164525	519.1054678	2.000737193	7450	1	1	1.386	1.326	1.568	1.418	1.422	1.336	1.513	1.546	1.407	1.439	1.3	1.323	1.511	1.51	1.447	1.32	1.42	1.551	1.578	1.438	1.618	1.542	1.506	1.396261195	1.697	1.552	1.6	1.228	1.492	1.37	1.299	1.256	1.425	1.42	1.425	1.481	1.473	1.367	1.63	1.523	1.343
333	249.5848276	299.049319	301.0565938	129.9819981	2.007274715	4629.724138	2	2	1.14	1.183	1.047	1.021	0.815	0.983	0.91	1.156	0.833	1.032	1.025	1.056	1.033	1.047	0.905	1.047	0.882	1.064	0.869	1.076	1.003	1.093	0.956	1.106	0.934	1.053	0.918	1.091	0.726	0.89	0.915	1.623	1.111	0.885	0.838	0.913	0.867	0.86	0.972	1.106	0.905
334	250.2724975	290.0445904	292.0514779	111.9725408	2.006887472	54921.1066	2	2	1.082	0.948	1.035	0.845	0.762	0.922	0.835	0.831	0.783	0.965	0.901	0.971	0.942	1.075	0.856	1.019	0.77	0.895	0.853	1.046	0.901	1.012	0.907	0.917	0.846	1.087	0.822	0.998	0.706	0.918	0.851	1.422	1.025	0.934	0.807	0.917	0.79	0.844	0.968	0.912	0.905
335	250.2759048	261.5454028	263.5520741	54.97416551	2.006671339	40979.2381	2	2	1.181	1.045	1.133	0.887	0.845	0.958	0.875	0.85	0.892	0.959	0.96	1.002	1.032	1.111	0.892	1.107	0.827	0.987	0.874	1.099	0.924	1.069	0.943	1.007	0.878	1.114	0.884	1.038	0.79	0.961	0.883	1.545	1.063	1.023	0.844	1	0.845	0.845	0.999	0.99	0.876
336	250.3239006	282.0585168	284.0651375	96.00039369	2.00662066	153260.4561	2	2	1.05	0.981	0.967	0.801	0.796	0.878	0.886	0.832	0.785	0.888	0.882	0.981	0.942	1.12	0.844	1.042	0.831	0.977	0.812	1.009	0.842	1.022	0.872	0.903	0.832	1.048	0.808	0.984	0.705	0.918	0.827	1.457	0.975	0.961	0.776	0.854	0.824	0.81	0.943	0.953	0.849
337	250.429	468.1435585	470.1494193	234.0852385	2.005860889	4524	1	1	0.608	0.955	0.888	0.83	1.434	1.69976952	0.778	0.634836802	0.836	1.071	0.606	0.47	1.043	1.352	0.676	0.804015095	0.747	0.649	0.753	0.941356666	1.086	2.109	1.022	0.5	1.146	0.918	1.266	1.067	0.802	0.794	0.81	0.627	1.1	1.307	1.072	0.712	0.627	0.546	0.735	0.799	0.89
338	250.4452614	291.0635595	293.0703096	114.0104791	2.006750109	58533.6732	2	2	1.003	0.958	0.938	0.772	0.845	0.901	0.855	0.841	0.771	0.873	0.853	0.976	0.923	1.179	0.869	1.097	0.8	1.01	0.805	0.929	0.835	1.08	0.849	0.872	0.818	1.054	0.814	1.004	0.734	0.998	0.886	1.466	0.977	0.936	0.771	0.843	0.868	0.801	0.908	1.059	0.882
339	253.9653551	399.1038427	401.1103166	165.0455227	2.006473938	232263.8505	1	1	0.661	0.741	0.641	0.632	0.523	0.561	0.463	0.423	0.461	0.449	0.571	0.517	0.687	0.633	0.642	0.603	0.704	0.534	0.539	0.61	0.548	0.553	0.513	0.589	0.561	0.691	0.502	0.585	0.409	0.439	0.57	0.33	0.595	0.643	0.575	0.594	0.704	0.685	0.833	0.8	0.584
340	255.569	302.5722182	304.5786047	137.0277964	2.006386517	8230	2	2	1.074	0.979	1.03	0.842	0.825	0.929	0.906	0.837	0.847	0.959	1.012	0.955253244	0.947	1.065	0.858	1.164	0.834	0.956	0.982	1.206	0.865	0.98	0.895	0.964	0.845	1.077	0.868	0.994	0.717	0.934	0.805	1.481	1.044	0.986	0.78	0.959	0.796	0.769	0.961	0.992	0.861
341	255.8785751	424.1166619	426.1231117	190.0583419	2.006449808	11657.44859	1	1	0.702	0.761	0.531	0.386	1.281	1.175	0.641	0.393	0.878	0.814	0.668	0.644	1.051	1.178	0.662	0.552	0.432	0.522	0.868	0.829	0.574	0.265	0.616	0.392	0.98	1.191	0.967	1.054	0.72	0.738	0.869	0.797	0.938	0.955	0.947	0.687	0.477	0.494	0.496	0.527	0.624
342	255.9338837	414.1212541	416.1277758	180.0629341	2.00652176	420727.6	1	1	0.494	0.36	0.565	0.334	0.662	0.39	0.468	0.403	0.53	0.434	0.595	0.445	0.71	0.555	0.656	0.529	0.525	0.506	0.555	0.57	0.799	0.629	0.89	0.691	0.789	0.616	0.707	0.62	2.508	2.052	0.591	0.731	0.424	0.45	0.632	0.71	0.493	0.501	0.64	0.646	0.459
344	257.1498	325.085068	327.0916073	91.02674795	2.006539331	30913.73333	1	1	0.89	0.913	0.88	0.846	0.896	0.816	0.839	0.677	0.832	0.752	0.773	0.669	0.824	0.924	0.902	0.933	0.969	1.052	0.88	0.895	1.133	1.094	1.046	0.934	1.035	1.146	0.967	1.038	0.842	0.83	0.739	0.582	0.752	0.787	0.736	0.902	1.191	1.094	0.922	0.874	0.982
345	257.2122857	353.1162519	355.1226317	119.0579319	2.006379726	16477.87755	1	1	0.817	0.718	0.844	1.361	1.333	0.612	0.67	0.656	0.799	1.464	0.963	1.316286549	1.16	0.912	1.142	0.873	0.869	0.696	0.715	0.92	0.895	0.918	0.922	0.82	1.465	1.052	1.018	1.212	1.279	1.166	0.667	0.614	1.085	1.068	1.598	1.035	0.563	0.543	0.742	0.766	0.621
346	257.6495311	515.1688395	517.1750419	281.1105195	2.0062024	25317.08134	1	1	1.393	0.693	2.026	2.597	3.173	0.645	0.538	0.517	0.813	3.422	3.46	2.572	4.3	1.118	3.248	0.847	0.548	0.564	0.575	0.917	1.258	1.292	1.956	1.168	5.03	1.248	2.444	2.398	3.514	3.079	0.392	0.723	1.719	1.853	5.897	4.308	0.268	0.284	0.384	0.374	0.301
347	258.0381209	392.1018494	394.1084306	158.0435294	2.006581218	84866.0186	1	1	0.695	0.638	0.68	0.628	0.574	0.532	0.515	0.525	0.54	0.554	0.532	0.523	0.591	0.573	0.607	0.692	0.616	0.787	0.554	0.638	0.795	0.836	0.78	0.689	0.738	0.781	0.727	0.74	0.678	0.574	0.56	0.584	0.514	0.502	0.575	0.674	0.696	0.686	0.635	0.569	0.601
348	258.3356667	320.5822002	322.5888563	173.0477603	2.006656143	3675.541667	2	2	1.198	0.968	1.189	0.887	0.729	0.918	0.805	0.92018733	0.758	0.733577337	0.987	0.849303693	1.012	1.097	0.817	1.044014842	0.904	0.959	0.961	1.502933134	0.92	1.075	0.991	1.061	0.848	1.247	0.875	0.946	0.907	0.965	0.782	1.365	0.965	1.028	0.864	1.018	0.876	0.858	1.058	0.998	0.891
349	258.4401934	404.1270786	406.1338805	170.0687586	2.006801897	7446.59375	1	1	1.309	1.663	1.093	1.067	1.193	1.055	0.151	0.143216153	1.061	0.942	1.791	1.74	0.777	0.801	0.768	0.697	2.016	1.226	1.269	1.142	0.341	0.338	0.537	0.557	0.582	0.624	0.149	0.118	0.179	0.188	0.474	0.19	0.423	0.396	0.354	0.964	2.902	2.767	0.473	0.489	1.384
351	258.633	274.0509449	276.0574749	39.99262491	2.006529977	5258	1	1	0.948	0.765	0.989	0.759	0.805	0.825	0.696	0.577	0.69	0.759	0.693	0.751	0.98	1.022	0.847	0.893	0.641	1.04	0.705	0.673	1.142	1.178	1	1.13	1.045	0.838	1.005	0.863	0.97	0.991	0.876	0.679	0.933	0.912	0.831	0.932	0.835	0.846	1.039	1.037	1.046
352	258.642	290.0434644	292.050308	55.98514441	2.006843572	13996	1	1	1.095	0.942	1.037	0.845	0.788	0.926	0.834	0.833	0.78	0.965	0.901	0.964	0.942	1.071	0.815	1.003	0.797	0.895	0.831	0.995	0.908	0.983	0.915	0.921	0.834	1.103	0.809	0.987	0.687	0.935	0.832	1.417	0.998	0.926	0.809	0.92	0.79	0.83	0.968	0.966	0.906
353	258.642	292.0294121	294.0357127	57.97109208	2.006300641	6452	1	1	1.051	0.951	0.918	0.806	0.792	0.918	0.863	0.831	0.765	0.885	0.882	0.949	0.94	1.149	0.897	1.06	0.726	0.9	0.766	0.997	0.815	0.949	0.906	0.892	0.912	1.084	0.831	1.029	0.77	0.924	0.891	1.466	0.94	0.991	0.764	0.949	0.887	0.841	0.946	0.977	0.892
354	259.574	276.0573307	278.0651701	41.99901075	2.007839368	5106	1	1	9.99	2.605	4.856	3.912	2.79	2.065	5.218	2.821	2.966	1.92	2.831	3.687808327	1.932	1.78	2.324	2.049089217	3.132	1.583	3.646	0.368	2.418	2.249	3.336	1.707	2.376	3.18	2.936	2.111	2.911	1.576	1.69	2.294	9.99	4.756	3.451	2.347	3.978	0.394	9.99	0.313	4.647
355	259.6046842	424.1175385	426.1240103	190.0592185	2.006471828	23492.63158	1	1	0.691	0.740033388	0.497	0.384	1.291	1.154	0.558	0.393107986	0.878	0.86	0.642	0.643581004	1.015	1.205	0.584	0.525942149	0.369	0.465	0.824	0.864275446	0.465	0.274	0.426	0.435091598	1.07	1.207	0.953	1.036	0.66	0.724	0.881	0.831	0.919	0.94	0.954	0.687	0.441	0.466	0.276	0.509	0.405
356	259.8886444	282.058207	284.0647569	95.99977395	2.006549895	22402.71111	2	2	1.065	0.959	0.963	0.8	0.796	0.878	0.885	0.839	0.804	0.874	0.875	0.961	0.941	1.113	0.853	1.017	0.824	0.971	0.796	1.021	0.829	1.015	0.844	0.905	0.833	1.041	0.82	0.94	0.694	0.927	0.825	1.452	0.971	0.965	0.778	0.838	0.819	0.81	0.925	0.953	0.853
357	260.6965	517.1313673	519.1375468	283.0730473	2.006179484	3114	1	1	1.438	0.59	1.51	0.59	1.647	0.59	1.181	1.277455344	0.762	1.277455344	1.116	0.59	1.22992479	0.950368219	2.276	1.62	0.948	1.043451252	1.876	0.718187892	1.068	1.277455344	3.471	0.59	0.830345358	1.277455344	1.017	2.72	2.422	1.410841198	1.161	1.089	1.222	1.01	1.890785965	0.59	0.9	0.505	1.155	1.693	0.852
358	264.8089	339.1005357	341.1073016	105.0422157	2.006765896	18168797.8	1	1	0.813	0.892	0.687	0.626	0.891	0.891	0.889	0.823	0.776	0.691	0.652	0.593519462	0.913	1.039	0.722	0.716	0.578	0.717	0.814	0.91	0.711	0.693	0.904	0.914	0.897	1.113	0.686	0.76	0.665	0.667	0.898	0.596	0.987	0.999	0.861	0.647	0.429	0.428	0.685	0.684	0.521
359	267.6916346	410.1376675	412.1441939	176.0793475	2.006526456	178275.8841	1	1	0.353	0.127	0.815	0.439	0.403	0.188	0.669	0.643	0.308	0.1	0.305	0.1	0.549	0.195	0.408	0.1	0.935	0.13	0.431	0.17	0.1	0.1	0.1	0.1	0.599	0.333	0.239	0.109	0.53	0.528	0.234	0.262	0.393	0.385	0.384	0.41	0.883	0.907	1.406	1.44	1.314
360	271.8656515	499.1732281	501.1804258	265.1149081	2.007197732	3649.454545	1	1	0.663	0.638	0.486	0.521	0.696	0.542	0.569	0.491	0.565	0.579	0.709	0.527	0.724	0.728	0.57	0.574	0.595	0.596	0.652	0.75	0.791	0.948	0.732	0.703	0.742	0.849	0.69	0.772	0.752	0.638	0.615	0.451	0.727	0.813	0.785	0.595	0.661	0.524	0.644	0.704	0.542
361	271.977	507.2347592	509.2456751	273.1764392	2.010915843	1990	1	1	1.182	2.058855834	1.769	1.105002157	1.709	1.167218276	1.701	1.439138307	1.341	1.753290577	1.357	0.87	1.934	0.87	1.662	0.87	2.397	0.87	1.687	0.87	1.518470186	0.87	1.528	1.755061807	1.8	1.539315437	1.355	0.87	1.537	1.703	1.391756046	1.656	2.006	1.814861292	1.778	1.393292419	2.287	2.206	4.101	4.507	2.732
362	272.1123333	505.2224307	507.2320387	271.1641107	2.009607927	5014.333333	1	1	0.664	0.749746559	0.748	0.584113565	0.601	0.613375439	0.765	0.971613547	0.594	0.459630789	1.002	9.99	0.729	0.381132888	0.617	7.21	0.611	4.96	0.739	9.99	0.378	0.76	0.447	0.558866212	0.567	0.595647881	0.432	0.395991108	0.555	0.683	0.498	0.363	1.779	1.618	1.459	0.599	0.437	0.472	0.183059966	0.719	0.463
365	273.009	309.03593	311.0420124	74.97761003	2.006082343	3116	1	1	0.810060704	0.378	0.45	0.493	0.45	0.865745736	0.761	0.838	0.449	0.673	0.628	0.6	0.482	0.454	0.838	0.562	0.522	1.327	0.642	0.826	0.565	0.467	0.496	1.015434927	0.566	0.621	0.613	0.793	0.572	0.649	0.617	1.478	0.45	0.254	0.751337119	0.305	0.809596411	0.317	0.66	0.793	0.86
366	273.1513431	534.1649766	536.171247	300.1066566	2.006270403	4906.705882	1	1	0.132	0.192	0.255	0.287	0.295	0.233	1.031	1.08	0.254	0.213	0.22	0.163	0.189	0.204	0.131	0.144	0.82	0.144	0.195	0.174	0.1001	0.1001	0.143	0.102	0.234	0.256	0.387	0.455	0.399	0.409	0.214	0.169	0.28	0.255	0.234	0.416	0.899	0.978	0.896	0.937	0.354
367	273.4085385	477.1423968	479.1470444	243.0840768	2.004647645	3116.307692	1	1	0.19	0.19	0.350096969	0.19	0.19	0.19	1.088	0.958	0.19	0.19	0.232	0.19	0.19	0.19	0.19	0.19	1.061	0.19	0.19	0.19	0.19	0.19	0.19	0.19	0.19	0.267599111	0.19	0.593	0.19	0.19	0.19	0.19	0.19	0.219	0.252	0.697	1.182	1.272	1.428	0.789	0.466
370	274.663	651.2440559	653.2502848	417.1857359	2.006228878	51779.66667	1	1	0.137	0.159	0.261	0.273	0.283	0.278	1.138	1.023	0.245	0.236	0.191	0.169	0.16	0.145	0.108	0.1	0.766	0.138	0.192	0.161	0.1001	0.1001	0.1	0.1	0.251	0.247	0.381	0.401	0.376	0.31	0.171	0.111	0.248	0.239	0.273	0.436	0.927	0.974	0.81	0.795	0.394
371	274.7642	322.1341663	324.1438461	88.07584631	2.009679794	3989.6	1	1	0.432	0.852	0.392	0.294	0.803	0.732	0.723	0.453	0.663	0.635	1.08	0.301	0.401	1.049	1.254	1.17	0.623	0.827	0.402	0.841	0.959	0.896	1.044	0.846	0.799	0.742	0.573	0.495	1.015	1.396	0.46	1.432	0.344	2.425	0.877	0.598	0.598	3.893	0.513	2.888	0.679
372	274.8706988	455.1511259	457.1548291	221.0928059	2.003703175	23936.0241	1	1	0.619	0.8	0.631	0.683	0.587	0.673	0.528	0.716	0.54	0.698	0.557	0.618	0.699	0.781	0.668	0.681	0.589	0.636	0.66	0.972	0.935	0.862	0.952	0.825	0.796	0.79	0.7	0.795	2.296	2.054	0.68	0.853	0.511	0.479	0.544	0.702	0.601	0.581	0.735	0.806	0.618
373	275.2952857	379.0953985	381.1020306	145.0370785	2.006632109	3603.142857	1	1	0.367	0.476	1.205	1.092	0.755	0.676	0.898	0.925	0.371	0.326	0.613	0.526	1.061	0.924	1.212	0.98	0.573	1.005	2.909	2.746	1.67	1.713	0.759	0.65	0.634	0.596	0.604	0.46	0.504	0.485	0.544	0.563	0.377	0.369	0.588	1.124	0.366	0.366	1.597	1.616	0.878
376	275.9136835	438.1323632	440.1393342	204.0740432	2.006970986	4274.860759	1	1	0.666	0.711	0.792	0.569	1.178	1.136	0.632	0.629	0.92	0.684	0.696	0.642	1.093	1.187	0.63	0.746	0.494	0.622	0.781	0.883	1.079	0.767	0.966	0.62	0.664	0.916	0.689	0.814	0.575	0.548	0.819	0.721	1.389	1.421	1.36	0.754	0.678	0.676	0.592	0.556	0.39
377	276.66857	452.148066	454.1546259	218.089746	2.006559921	113118.02	1	1	0.928	1.023	1.077	1.014	0.361	0.336	0.545	0.496	0.737	0.713	0.51	0.5	0.502	0.536	0.797	0.766	0.68	0.444	0.579	0.589	0.42	0.393	0.454	0.459	0.592	0.691	0.359	0.381	0.643	0.598	0.39	0.272	0.477	0.49	0.47	1.029	0.507	0.494	0.483	0.505	0.767
378	276.6726517	477.1302077	479.1368916	243.0718877	2.006683867	4186.449438	1	1	0.743	0.681	0.709	0.755	0.785	0.696	0.684	0.467	0.76	0.633	0.773	0.567	0.859	0.812	0.726	0.686	0.876	0.758	0.879	0.603	1.145	0.914	1.028	1.062	0.909	0.8	0.761	0.916	2.443	2.169	0.843	0.853	0.617	0.536	0.663	0.712	0.626	0.595	0.884	0.734	0.738
384	280.105	617.1650967	619.1734535	383.1067767	2.008356775	2210	1	1	0.861	0.725	0.521	1.174	0.828	0.624144841	0.65	0.786816517	0.931	0.585062654	0.788	0.640374831	0.703	0.848820038	0.876	0.836238975	0.715	0.938810518	1.106	0.867561337	0.987	1.334	1.015	0.937	1.041	0.911	0.967	0.688849776	1.183	1.053	0.613	0.29	0.785	0.701	0.894	1.014	0.743	0.588	0.929	0.735	0.29
385	280.2331282	455.1495777	457.1546616	221.0912577	2.005083871	15496.77874	1	1	0.604	0.736	0.612	0.564	0.573	0.649	0.509	0.722	0.531	0.635	0.542	0.602	0.682	0.764	0.639	0.659	0.579	0.637	0.64	0.972	0.929	0.925	0.947	0.809	0.781	0.781	0.682	0.808	2.285	2.048	0.672	0.87	0.496	0.466	0.529	0.687	0.593	0.577	0.732	0.809	0.606
386	280.664	299.083626	301.0902702	65.02530598	2.006644185	4035	1	1	1.165	1.692	1.005	1.056	1.114	1.012	0.21	0.21	0.918	0.864	1.874	1.505	0.699	0.897	0.687	0.667	2.077	1.306	1.223	1.315	0.358	0.343	0.509	0.516	0.631	0.637	0.275	0.365	0.283	0.245	0.435	0.181	0.513	0.36	0.324	1.026	3.018	2.884	0.477	0.453	1.398
387	281.173	568.1955684	570.2018208	334.1372484	2.006252328	2054	1	1	0.601	0.829	1.011	1.45	1.607	0.598	0.488	0.575	0.745	0.689	1.478	1.018	1.214	0.789	1.53	0.943	0.579	0.824	0.544	0.957	1.015	1.008	0.685	1.137	1.609	0.991	1.203	1.051	3.7	1.776	0.765	0.685	0.873	0.858	1.346	1.507	0.48	0.238	0.577	0.43	0.53
388	281.3155235	365.1266384	367.1323522	131.0683184	2.005713856	11240.27059	1	1	1.048	0.912	1.016	0.873	0.799	0.657	1.059	0.689	0.783	0.702	1.706	0.922	0.883	0.796	1.427	1.053	1.365	1.357	1.297	0.861	1.37	0.974	1.675	0.916	1.41	1.598	1.377	2.007	0.907	0.914	1.555	1.684	0.724	0.685	0.77	2.062	1.279	1	1.3	1.22	1.488
390	281.7856387	480.1429873	482.1496919	246.0846673	2.006704673	7875.486911	1	1	0.711	0.3	0.833	0.309	0.714	0.447	0.751	0.415	0.778	0.452	0.561	0.359	0.817	0.431	0.749	0.937	0.947	0.474	0.863	0.56	1.007	0.659	1.144	0.785	1.19	0.793	0.916	0.782	0.879	0.544	0.58	0.689	0.775	1.771	0.91	0.696	0.631	0.832	0.549	1.263	0.513
391	281.9008437	353.1160227	355.1225964	119.0577027	2.006573704	21533.54173	1	1	0.831	0.722	0.911	0.674	1.553	0.671	0.686	0.605	0.815	0.816	1.16	0.596	1.141	0.945	1.622	0.973	0.853	0.911	0.755	0.865	1.002	0.748	0.942	0.633	1.091	1.327	1.045	0.796	1.443	0.845	0.681	0.664	1.134	1.146	1.371	1.196	0.639	0.525	0.745	0.791	0.691
392	282.4745556	322.1218581	324.1277349	88.06353814	2.005876786	3517.777778	1	1	0.597	0.621	0.561	0.56	0.682	0.553	0.406	0.415	1.392	1.102	0.717	0.618	0.541	0.713	0.612	0.386	1.571	0.746	1.216	1.054	0.657	0.847	0.944	0.643	0.48	0.474	0.354	0.445	0.342	0.577	0.384	0.543	0.268	0.481	0.671	0.604	0.774	0.676	0.653	0.865	0.517
393	283.1289716	422.1374831	424.1440103	188.0791631	2.00652717	35924.72727	1	1	1.239	1.542	1.012	1.1	1.052	1.039	0.285	0.196	1.003	0.874	1.592	1.507	0.794	0.856	0.849	0.755	1.606	1.27	1.264	1.169	0.594	0.452	0.628	0.543	0.671	0.718	0.372	0.261	0.259	0.32	0.58	0.454	0.473	0.491	0.447	0.903	2.374	2.419	0.686	0.615	1.223
394	283.3443571	519.1908159	521.19687	285.1324959	2.00605412	3529.285714	1	1	0.33	0.197	0.563	0.564	0.309	0.656	0.14	0.14	0.25	0.234663374	0.14	0.14	0.372	0.255	0.14	0.14	0.829	0.344	0.14	0.14	0.532	0.426	0.366	0.578	0.14	0.14	1.03	0.676	0.14	0.14	0.14	0.14	0.14	0.218	0.14	0.29	1.191	1.248	0.651	0.812	0.996
395	283.95575	408.1589739	410.1654212	174.1006539	2.006447378	20626.5	1	1	0.522	0.357	0.449	0.246	0.851	0.814	0.537	0.432	0.531	0.324	0.526	0.371260022	0.563	0.318	0.719	0.482355145	0.69	0.405	1.036	1.288889804	0.882	0.834	0.706	0.468	0.782	0.864	1.326	0.98	0.52	0.541	1.468	0.873	0.456	0.565	0.417	0.51	0.486	0.545	1.993	2.027	0.848
397	284.2570833	422.137999	424.1444176	188.079679	2.006418594	66240.5	1	1	1.239	1.351	1.012	1.095	1.047	1.028	0.285	0.203	1.003	0.868	1.618	1.507	0.793	0.85	0.856	0.755	1.629	1.177	1.264	1.169	0.538	0.553	0.628	0.569	0.678	0.715	0.287	0.32	0.302	0.324	0.573	0.461	0.506	0.499	0.438	0.901	2.4	2.533	0.625	0.635	1.234
398	287.0138462	381.11119	383.1178654	147.05287	2.006675412	13881136.6	1	1	0.722	0.836	0.551	0.535	0.695	0.622	0.411	0.372	0.627	0.597	0.612	0.56	0.632	0.686	0.578	0.563	0.214	0.584	0.662	0.761	0.48	0.545	0.641	0.596	0.604	0.708	0.724	0.805	0.736	0.731	0.613	0.309	0.681	0.668	0.634	0.557	0.228	0.233	0.185	0.196	0.196
399	288.8825849	362.1163807	364.1229347	128.0580607	2.006554036	382094.0566	1	1	0.702	0.784	1.009	0.956	0.613	0.473	0.44	0.379	0.363	0.367	1.28	1.151	0.478	0.437	1.651	1.52	1.136	2.531	1.55	1.608	0.57	0.566	0.503	0.485	2.099	1.959	0.471	0.48	0.7	0.628	0.5	0.471	0.478	0.431	0.507	1.125	1.487	1.517	2.783	2.845	0.677
400	288.9707721	414.1212601	416.1278763	180.0629401	2.006616217	4488288.614	1	1	0.471	0.456	0.503	0.387	0.528	0.433	0.448	0.335	0.491	0.385	0.481	0.386	0.568	0.547	0.527	0.456	0.539	0.515	0.548	0.506	0.773	0.659	0.809	0.687	0.634	0.657	0.583	0.609	2.344	2.112	0.611	0.634	0.425	0.435	0.453	0.552	0.534	0.527	0.674	0.683	0.532
401	290.9653991	367.0953011	369.1019527	133.0369811	2.006651611	6417553.981	1	1	0.7	0.721	0.572	0.515	0.862	0.846	0.673	0.614	0.933	0.884	0.63	0.621	0.95	0.952	0.646	0.608	0.233	0.629	0.612	0.632	0.225	0.203	0.408	0.359	0.949	1.082	0.749	0.825	0.836	0.859	0.745	0.643	0.821	0.839	0.772	0.758	0.288	0.283	0.289	0.276	0.208
402	291.834142	404.1270016	406.1335182	170.0686816	2.00651668	75340.53086	1	1	1.348	1.739	1.066	1.121	1.19	1.075	0.143	0.128	1.045	0.912	1.846	1.73	0.777	0.826	0.751	0.657	2.011	1.289	1.241	1.268	0.331	0.302	0.54	0.523	0.588	0.627	0.147	0.156	0.182	0.179	0.454	0.187	0.418	0.391	0.356	0.959	2.958	2.829	0.467	0.468	1.394
403	292.74125	398.1257796	400.1330956	164.0674596	2.007315946	18900	1	1	1.033	0.459	1.008	0.403	1.277	0.853	0.598	0.365	0.764	0.611	1.005	0.680527936	0.663	0.469	0.983	0.576	0.862	0.637	0.796	0.604353668	1.212	0.875	1.074	0.686	1.018	0.925	0.942	0.821	0.490339748	0.113086102	0.519	0.799	0.77	0.784	1.446	1.196	0.75	0.645	0.993	1.024	0.92
405	295.3190973	402.0866613	404.0932308	168.0283413	2.006569568	36442.84956	1	1	0.858	0.63	1.123	0.846	0.693	0.52	0.637	0.507	0.651	0.589	0.906	0.68	0.511	0.372	1.154	0.837	0.907	0.944	1.055	0.95	0.945	0.774	0.62	0.477	0.898	0.84	1.08	0.981	0.987	0.895	0.44	0.633	0.454	0.474	0.585	1.011	0.71	0.754	0.681	0.669	1.067
406	296.0944651	365.1160402	367.1226577	131.0577202	2.006617515	1617406.307	1	1	1.166	1.257	0.668	0.66	0.859	0.711	0.459	0.411	0.588	0.574	1.149	1.057	0.698	0.704	1.306	1.181	0.995	0.534	0.554	0.629	0.815	0.855	0.838	0.791	0.992	1.002	0.786	0.799	1.732	1.616	0.938	0.78	0.701	0.704	0.725	0.63	0.904	0.931	0.438	0.438	0.825
407	296.7490523	422.1375311	424.14465	188.0792111	2.007118873	19560.51163	1	1	1.237	1.578	1.013	1.03	1.051	1.005	0.312	0.303	1.016	0.819	1.597	1.282	0.793	0.845	0.868	0.814	1.574	1.264	1.232	1.18	0.602	0.48	0.63	0.535	0.677	0.786	0.412	0.411	0.384	0.404	0.582	0.512	0.542	0.553	0.508	0.905	2.14	2.307	0.698	0.708	1.205
408	297.983986	455.1478451	457.1543471	221.0895251	2.006501936	112388.9581	1	1	0.574	0.559	0.605	0.469	0.578	0.513	0.51	0.444	0.532	0.517	0.539	0.47	0.671	0.673	0.634	0.547	0.577	0.622	0.648	0.565	0.927	0.788	0.944	0.815	0.776	0.78	0.68	0.783	2.336	2.063	0.682	1.139	0.488	0.464	0.527	0.668	0.589	0.577	0.73	0.804	0.587
409	298.654	464.1874813	466.191499	230.1291613	2.004017617	2148	1	1	1.087	1.061	2.147	1.987	0.857	6.966	1.131	1.086535354	1.119	9.99	0.956	9.902	0.743	0.614	1.018	1.262	0.835	0.841	1.199	9.99	0.626	6.229	0.793	0.747	0.768	1.126	0.741	9.809	0.704	0.967	0.736	0.739	0.842	0.896	0.77	0.928	0.622	0.753	1.12	1.107	1.017
410	299.1662202	471.088517	473.0948828	237.030197	2.006365788	6367.319886	1	1	0.539	0.604	0.459	0.488	0.574	0.534	0.418	0.401	0.52	0.514	0.423	0.437	0.447	0.54	0.559	0.641	0.551	0.654	0.65	0.755	0.875	0.869	0.74	0.671	0.693	0.848	0.706	0.68	0.919	1.002	0.537	0.457	0.614	0.584	0.508	0.537	0.442	0.473	0.522	0.596	0.512
411	299.3845	408.1229752	410.1292695	174.0646552	2.00629429	5486.333333	1	1	0.698	0.707442252	0.681	0.587	0.428	0.536	0.759	0.622	0.315351755	0.590199632	0.370844034	0.789350486	0.405	0.604271433	0.23	0.779511004	1.127	0.4	1.162931384	0.483836557	0.23	0.987178288	0.324	0.570743761	0.479	0.427	0.23	0.23	0.23	0.23	0.23	0.731	0.492	0.378	0.43	0.294	1.011	0.871	1.328	1.437	0.947
412	299.5165854	404.1269909	406.1334997	170.0686709	2.006508842	10990.85366	1	1	1.347	1.716	1.068	1.117	1.19	1.113	0.143	0.126	1.049	0.942	1.828	1.581	0.777	0.827	0.752	0.652	2.009	1.208	1.245	1.259	0.331	0.304	0.545	0.511	0.586	0.63	0.147	0.153	0.182	0.183	0.451	0.187	0.418	0.394	0.354	0.956	2.965	2.84	0.467	0.468	1.392
413	299.574	553.182676	555.1883566	319.124356	2.005680562	2060	1	1	0.455	0.452	0.485	0.351	0.545	0.504	0.5	0.434	0.472	0.481	0.455	0.433	0.53	0.59	0.562	0.506	0.56	0.525	0.533	0.603297772	0.801	0.661	0.825	0.69	0.755	0.638	0.709	0.643	2.136	2.137089144	0.662	0.627	0.547	0.526	0.506	0.598	0.517	0.616	0.753	0.706	0.53
415	299.8965	342.0458241	344.0524323	107.9875041	2.006608211	7158	1	1	0.809	2.031	1.177	1.857	1.359	1.424	0.688	1.118	1.126	1.219	1.597	1.074	0.984	0.9	1.451	1.538	1.421	1.992	0.961	1.754	0.863	1.895	0.945	1.553	1.415	2.166	1.647	1.364	1.124	1.926	0.744	2.278	1.484	1.357	0.951	1.805	1.194	1.098	1.347	1.025	1.055
418	302.858816	414.1212538	416.1278814	180.0629338	2.006627676	6212006.972	1	1	0.47	0.454	0.506	0.387	0.532	0.432	0.447	0.333	0.49	0.386	0.482	0.391	0.568	0.561	0.527	0.457	0.54	0.518	0.549	0.512	0.77	0.664	0.809	0.692	0.637	0.656	0.585	0.605	2.334	2.108	0.61	0.636	0.427	0.437	0.455	0.556	0.531	0.525	0.675	0.683	0.531
419	303.8972774	339.100549	341.1070638	105.042229	2.006514762	11908.62703	1	1	0.822	0.908	0.677	0.673	0.909	0.94	0.923	0.817	0.806	0.726	0.648	0.579	0.929	0.985	0.74	0.74	0.614	0.716	0.855	0.858	0.749	0.73	0.934	0.938	0.916	1.112	0.69	0.776	0.688	0.704	0.943	0.624	1.012	0.999	0.897	0.682	0.452	0.465	0.703	0.711	0.557
420	306.1784706	479.2433012	481.2497747	245.1849812	2.006473471	10011.21569	1	1	0.93	0.802	0.818	0.687	0.76	0.834	0.903	0.878	0.756	0.619	0.792	0.761	0.854	1.017	0.77	0.899	0.868	0.97	0.786	0.943267086	0.458	0.466	0.664	0.607	0.975	1.151	0.528	0.562	0.623	0.807	0.674	1.185	0.816	0.803	1.056	0.636	0.498	0.575	0.701	0.743	0.512
421	307.0973163	362.1639791	364.1705894	128.1056591	2.006610251	734476.2698	1	1	0.898	0.781	0.916	0.722	0.792	0.81	0.928	0.922	0.678	0.657	0.754	0.811	0.883	1.039	0.815	0.903	0.778	0.941	0.8	0.865	0.449	0.499	0.686	0.583	1.014	1.22	0.527	0.53	0.708	0.808	0.643	1.265	0.779	0.803	1.078	0.697	0.486	0.512	0.704	0.702	0.492
422	307.426	462.1804015	464.1870223	228.1220815	2.006620735	3986.8	1	1	0.858	0.715	0.607	0.567	0.482	0.5	0.412	0.398	0.373	0.444	0.935	0.925019396	0.55	0.639	0.667	0.635	0.754	0.569	0.56	0.73571864	0.542	0.535	0.429	0.538	0.412	0.524	0.398	0.371	0.577	0.506	0.535	1.028	0.716	0.82	0.965	0.624	0.53	0.626	0.434	0.433	0.45
423	307.4273121	349.095932	351.1024765	115.037612	2.006544553	9119.304965	1	1	0.946	0.838	1.136	0.972	0.688	0.652	0.583	0.555	0.562	0.675	0.741	0.779	0.522	0.468	1.01	0.96	0.744	1.004	0.842	0.98	0.896	0.882	0.664	0.593	0.915	0.843	0.92	1.127	0.709	0.93	0.432	1.382	0.628	0.663	0.512	0.869	0.838	0.929	0.87	0.91	1.246
425	307.881	394.1087007	396.1115035	160.0503807	2.002802783	7294	1	1	0.754	0.827501378	0.703	1.823	0.627	0.431	0.976	0.837157469	0.986	1.172	0.749	1.185884036	0.688	0.750743258	0.637	0.852162156	0.771	0.628456697	0.63	0.480233462	0.479	0.630339923	0.518	0.504255325	0.649	0.545	0.793	0.656	0.194	0.166	0.578	0.339	0.749	0.548	0.917	0.729	0.801	0.644	0.599	0.408	0.752
426	308.2323333	523.1859579	525.1920876	289.1276379	2.006129756	3824.666667	1	1	1.768	1.299	0.404	0.449	0.43	0.43	0.43	0.43	0.366	0.43	0.401	0.661270798	0.705	0.674	0.538	0.661	0.704	0.43	0.43	0.43	0.438	0.244	0.477	0.383	0.817	1.077	0.43	0.43	0.959	0.965	0.649	0.439	0.43	0.247	0.43	0.43	0.384	0.458	0.515	0.42	1.096
427	308.7054615	367.1700648	369.1739476	133.1117448	2.00388278	3584.153846	1	1	1.753	1.393	1.402	1.18	1.509	1.249	1.747	1.249	1.514	1.093	1.642	1.206	1.524	1.479	1.513	1.43	1.406	1.301	1.603	0.922	1.903	1.517	1.568	1.691	1.516	1.374	1.524	1.432	1.569	1.042	1.434	0.922	1.745	0.809	1.581	1.832	1.874	1.361	1.867	1.314	1.455
428	308.7383925	562.232285	564.2387247	328.173965	2.006439723	70128.65421	1	1	0.862	1.228	1.382	2.011	0.895	1.009	0.558	0.626	0.887	1.008	0.941	0.962	0.692	0.74	0.99	1.012	0.743	1.067	0.966	1.014	1.194	1.478	1.123	1.22	1.277	1.567	1.348	1.42	0.636	0.817	0.651	1.07	0.793	0.789	0.734	1.013	0.765	0.78	1.176	1.169	1.334
429	308.807	653.3594569	655.365132	419.3011369	2.005675034	2106	1	1	0.754	0.855598724	0.833	1.162	0.547	0.701	0.903	0.847623938	0.89	1.108	0.784	0.39	1.001	1.086657978	0.799	1.064665075	0.718	0.848	0.894	1.205301893	0.74	0.478716337	0.834	1.010939713	0.958	1.4130712	0.638	0.770918086	1.032	1.006	0.651	1.015	0.773	0.911	1.027	0.735	0.475	1	0.912	0.981	0.891
430	308.8878258	380.163276	382.1698234	146.104956	2.006547472	6633.561798	1	1	0.846	1.3	1.455	2.051	1	0.999	0.608	0.753	0.909	0.956	1.04	1.02	0.673	0.814	0.999	1.098	0.772	1.052	0.972	1.051	1.256	1.485	1.165	1.21	1.363	1.52	1.331	1.724	0.653	0.933	0.726	1.118	0.81	0.842	0.82	1.035	0.862	0.789	1.229	1.311	1.457
431	309.7845714	408.1586742	410.1654395	174.1003542	2.0067653	4023.857143	1	1	0.644	0.869	0.54	0.612	0.803	0.828	0.62	0.575	0.623	0.663	0.548	0.500915347	0.705	0.781	0.711	0.843237335	0.652	0.547	0.835	0.906042994	0.872	0.782	0.783	0.791	0.757	0.843	1.32	1.698	0.519	0.646	0.907	0.709	0.54	0.799	0.535	0.51	0.52	0.599	0.964	1.059	0.869
432	309.934	492.1799063	494.1876906	258.1215863	2.007784244	1774	1	1	1.051294536	0.528952924	0.790760508	0.442	0.44	0.957	0.587	0.60332056	0.734	1.475812118	0.44	0.638830688	2.444342872	0.530601172	0.839	0.519770802	0.44	0.662447147	0.942	0.618	0.44	0.911104329	0.912	0.765	1.278975023	0.44	0.44	0.983	1.012	0.919	0.44	0.44	0.817	0.64	1.204671005	2.241196883	0.44	0.393	0.44	0.644	0.44
433	309.937	394.1424896	396.1496951	160.0841696	2.007205472	3254	1	1	0.819	0.680831045	0.603	0.777	0.676	0.623	0.66	0.449	0.566	0.493	0.483	0.506839682	0.683	0.762	0.424	0.549	0.617	1.471	0.601	1.022804308	1.166	1.292	0.675	0.722	0.559	0.696	0.543	0.728	0.635	0.671	0.919	0.787	0.9	0.985	0.753	0.864	0.363	0.338	1.821	2.275	0.651
435	310.4259175	455.1478533	457.1543632	221.0895333	2.006509828	35742.3358	1	1	0.55	0.518	0.596	0.441	0.573	0.493	0.5	0.441	0.532	0.501	0.547	0.474	0.671	0.636	0.638	0.555	0.566	0.61	0.658	0.552	0.924	0.813	0.938	0.828	0.782	0.764	0.681	0.752	2.329	2.03	0.678	1.182	0.483	0.464	0.525	0.668	0.589	0.576	0.73	0.755	0.585
438	311.6133333	317.1319273	319.1383497	83.07360733	2.006422363	8112	1	1	0.952	0.877	0.981	0.891	0.94	0.895	0.879	0.78	0.939	0.838	0.968	0.814	1.07	0.775	0.976	0.777	0.9	0.811	0.978	0.926	0.919	0.878	0.939	0.821	0.949	0.863	1.002	0.893	0.951	0.891	0.86	0.844	0.871	0.799	0.881	0.896	0.859	0.866	0.857	0.817	0.894
439	311.8615	288.1030356	290.1090994	108.0894312	2.006063836	2312	2	2	2.075	2.067	3.956	1.343	2.252	1.91	2.882	1.926	2.101	2.124	1.617	1.473	2.68	2.229	2.399	1.116	1.264	2.306	1.676	1.032	3.185	2.538	2.732	3.417	1.642	1.893	3.672	1.947	2.203	2.542	2.797	1.396	2.359	2.437	2.067	3.344	2.03	2.855	3.192	1.74	3.132
441	312.4904588	600.20012	602.2066571	366.1418	2.006537145	8435.717647	1	1	0.487	0.506	0.507	0.501	0.666	0.64	0.597	0.5	0.582	0.521	0.531	0.502	0.538	0.623	0.674	0.638	0.489	0.6	0.571	0.671	0.779	0.777	0.744	0.666	0.766	0.841	0.686	0.742	0.657	0.672	0.65	0.349	0.687	0.657	0.609	0.565	0.53	0.586	0.687	0.636	0.395
443	312.73375	465.1799295	467.1860126	231.1216095	2.006083136	3711.875	1	1	1.048	1.141	1.208	1.649	1.011	1.21	0.949	0.957	1.394	1.186	1.944	1.841	2.413	2.777	1.385	1.137	0.165	0.936	1.364	1.382	0.582	0.511	0.489	0.312	2.146	2.341	0.715	0.654	1.489	2.014	2.253	1.937	0.709	0.75	0.633	0.693	0.389	0.464	0.585	0.47	0.309
444	313.76475	294.0903727	296.0969247	60.03205266	2.006552075	9273.5	1	1	0.957	0.939	0.686	0.537	0.65	0.618	0.456	0.482	0.812	0.587	0.843	0.838	0.946	0.808	0.818	0.711	0.778	0.869	0.781	0.731	0.852	0.737	0.737	0.518	0.894	0.813	0.689	0.88	0.591	0.714	0.702	0.99	0.553	0.584	0.532	0.527	1.272	1.263	0.662	0.62	0.574
445	314.5472326	367.0953094	369.1018481	133.0369894	2.006538738	51018.7907	1	1	0.568	0.172	0.421	0.368	0.643	0.567	0.516	0.387	0.902	0.884	0.472	0.138	0.743	0.269	0.48	0.283	0.193	0.312	0.469	0.173	0.248	0.700838663	0.691	0.373	0.757	0.779	0.587	0.554	0.641	0.612	0.597	0.455	0.638	0.666	0.643	0.609	0.245	0.225	0.243	0.229	0.175
446	314.9717984	395.1265426	397.132659	161.0682226	2.006116368	19909.04516	1	1	1.411	0.93	1.646	1.886	2.455	0.529	0.486	0.486	0.54	1.961	2.547	3.447	3.065	0.77	2.588	0.794	0.575	0.575	0.598	0.876	1.177	1.418	1.802	0.916	2.874	0.722	2.88	2.407	3.615	3.062	0.607	0.815	0.917	0.744	3.102	3.141	0.422	0.413	0.516	0.472	0.496
447	315.5141319	337.1575178	339.1641448	103.0991978	2.006627062	2137659.472	1	1	0.557	0.55	0.817	0.758	0.846	0.692	0.674	0.557	0.739	0.687	0.842	0.633	0.994	0.761	0.742	0.602	0.267	0.533	0.727	0.711	0.519	0.419	0.447	0.378	0.818	0.835	1.08	1.263	0.664	0.715	0.591	0.638	0.999	1.001	0.971	0.667	0.302	0.294	0.335	0.334	0.282
448	317.3161266	414.1213439	416.1279018	180.0630239	2.006557906	84088.53165	1	1	0.473	0.462	0.507	0.399	0.535	0.434	0.514	0.421	0.474	0.411	0.49	0.392	0.576	0.567	0.543	0.465	0.515	0.524	0.547	0.504	0.779	0.644	0.836	0.664	0.64	0.657	0.604	0.615	2.294	2.07	0.602	0.888	0.429	0.437	0.46	0.562	0.459	0.452	0.661	0.661	0.512
449	317.5670738	422.1739476	424.1805094	188.1156276	2.006561848	20843.36913	1	1	0.716	0.682	0.559	0.54	0.663	0.602	0.811	0.705	0.667	0.663	0.741	0.699	0.596	0.568	0.709	0.654	0.741	0.675	0.661	0.735	1.086	1.05	1.007	0.914	0.839	0.915	0.911	0.965	0.711	0.643	0.821	0.326	0.684	0.71	0.718	0.568	0.61	0.622	0.759	0.704	0.684
450	319.168	450.1335713	452.1395008	216.0752513	2.005929444	4942	1	1	0.713	1.078	0.886	0.867	0.957	1.103	0.848	0.978	0.628	0.788	0.721	0.905	0.635	0.996	0.943	1.346	1.251	0.901	0.702	1.358	0.522	0.976	0.688	1.183	0.795	1.217	0.701	0.953	0.764	0.691	0.677	1.895	0.818	0.9	0.974	1.076	0.895	0.888	0.688	0.915	0.773
451	319.3875	303.1143726	305.1221518	69.05605257	2.007779192	12199.5	1	1	1.695	1.216	1.186	0.763	0.967	0.69	0.733	0.603	0.78	0.737	1.007	0.768	0.984	0.824	0.871	0.796	0.916	0.69	0.778	0.821	0.903	0.712	0.735	0.672	0.672	0.791	0.78	0.746	0.558	0.638	0.903	0.701	0.856	0.922	0.793	0.911	0.545	0.498	0.662	0.569	0.619
453	320.7824958	379.1317804	381.1382847	145.0734604	2.00650431	381074.437	1	1	0.501	0.1	0.719	0.439	0.485	0.1	0.274	0.1	0.711	0.549	0.611	0.1	0.409	0.1	0.579	0.135	0.82	0.452	0.605	0.555	0.503	0.1	0.339	0.125	0.514	0.199	0.465	0.105	0.325	0.566	0.1	0.688	0.639	0.628	0.817	0.48	0.1	0.502	0.122	0.481	0.139
454	321.583307	363.1479844	365.1545277	129.0896644	2.006543235	282655.2	1	1	1.307	1.153	1.251	1.08	0.98	1.106	1.141	1.083	0.912	0.882	1.139	0.985	1.266	1.29	1.051	1.246	1.078	1.283	1.083	1.202	0.599	0.582	0.823	0.746	1.201	1.581	0.669	0.782	0.837	1.119	0.77	1.326	1.542	1.599	1.255	0.797	1.024	0.958	1.248	1.232	0.974
455	321.8248361	477.1798936	479.1863907	243.1215736	2.00649713	108287.2459	1	1	0.717	0.822	0.662	0.596	0.649	0.604	0.682	0.605	0.689	0.618	0.878	0.756	0.646	0.687	0.702	0.61	0.934	0.54	0.919	0.786	0.671	0.562	0.483	0.44	0.368	0.4	0.308	0.351	0.43	0.427	0.522	0.498	1.365	1.38	1.226	0.627	0.83	0.795	0.744	0.705	0.556
457	324.4492667	353.1162876	355.1230338	119.0579676	2.00674618	17481270.27	1	1	0.597	0.727	0.752	0.739	0.88	0.904	0.851	0.856	1.011	0.948	0.76	0.747	0.862	0.947	0.836	0.851	0.772	0.73	0.714	0.97	0.695	0.721	0.735	0.701	1.135	1.268	0.596	0.628	0.556	0.543	0.591	0.336	1.346	1.343	1.268	0.774	0.619	0.636	0.902	0.945	0.686
458	326.4883043	395.1266914	397.13329	161.0683714	2.006598591	96531.24638	1	1	1.503	0.921	1.659	0.503	2.776	0.39	0.486	0.439	0.524	0.493	2.767	0.7	3.29	0.393	2.76	0.783	0.601	0.584	0.598	0.618	1.186	0.568	1.886	0.458	2.89	0.532	3.033	0.649	3.596	3.159	0.607	0.765	0.881	0.774	3.376	2.944	0.417	0.421	0.516	0.472	0.495
459	327.8867347	389.1276773	391.1337716	155.0693573	2.006094246	116888.7347	1	1	1.28	0.866	1.384	2.609	3.437	0.58	0.303	0.417	0.439	2.342	1.845	2.169107437	2.532	1.022	2.112	0.857	0.224	0.66	1.712	3.123251061	0.955	1.325	1.441	1.259	4.037	0.856	2.238	2.66	4.358	3.229	3.739	4.784	0.73	0.614	1.961	2.423	0.422	0.528	0.335	0.422715007	0.184
460	330.452	462.1691827	464.1753722	228.1108627	2.006189578	84872	1	1	0.985	1.212	0.942	0.968	0.806	0.787	0.991	0.868	0.494	0.484	0.96	1.224	0.6	0.67	1.13	1.147	1.062	1.007	0.973	1.171	0.655	0.656	0.855	0.763	0.86	0.909	0.788	0.82	0.973	0.871	0.418	0.335	1.17	1.202	1.212	0.672	0.755	0.763	0.967	0.934	0.987
461	334.0208095	511.1744995	513.1836294	277.1161795	2.009129817	21993.52381	1	1	0.437	0.463	0.451	0.351	0.397	0.394	0.367	0.301	0.386	0.296	0.557	0.336	0.381	0.49	0.37	0.358	0.516	0.338	0.537	0.577	0.416	0.477	0.358	0.352	0.312	0.333	0.287	0.253	1.131	1.271	0.367	0.547	0.665	0.625	0.672	0.379	0.436	0.438	0.371	0.363	0.328
462	335.2253333	415.0991852	417.105651	181.0408652	2.006465779	44458	1	1	0.557	0.587	0.831	0.678	0.52	0.555	0.444	0.446	0.352	0.416	0.28	0.417655387	0.462	0.489	0.622	0.549	0.597	0.774421294	0.713	0.838199474	0.881	0.787411482	0.518	0.503	0.772	0.882	0.874	0.816	0.458	0.501	0.61	0.422	0.675	0.654	0.541	0.428	0.495	0.372	1.161	0.979	0.494
463	336.2195	457.0878508	459.0939945	223.0295308	2.006143701	26650.5	1	1	1.415	1.234	1.631	1.306	1.696	1.352	1.428	1.212	1.656	1.323	1.448	1.088	2.193	1.649	1.828	1.507	1.471	1.753	1.746	1.632	2.53	2.07	2.268	2.166	2.223	1.984	1.853	1.92	2.051	1.893	1.452	0.897	1.596	1.609	1.571	1.74	1.326	1.326	1.749	1.808	1.634
464	336.6373915	295.1107825	297.1173948	61.05246248	2.006612286	1242348	1	1	0.592	0.63	0.577	0.609	0.787	0.743	0.649	0.581	0.83	0.696	0.637	0.586	0.865	0.966	0.731	0.749	0.615	0.831	0.846	0.858	0.631	0.597	0.639	0.552	0.756	0.915	0.889	1.056	0.446	0.51	0.925	0.863	1.085	1.089	0.88	0.602	0.573	0.559	0.644	0.635	0.456
465	337.1175	404.1743888	406.180729	170.1160688	2.006340293	9116	1	1	0.994	0.471	0.572	0.295	0.528046118	0.456	0.378	0.421	0.306	0.501	0.658	0.869	0.417	0.387	0.639	0.632	0.624	0.636	0.566	0.656	0.523	0.641	0.473	0.303	0.355	0.506	0.371	0.344	0.519	0.555	0.371	0.92	0.603	0.62	0.664	0.44	0.451	0.394	0.408	0.334	0.376
466	337.2753333	408.1587571	410.1650662	174.1004371	2.006309101	12098.66667	1	1	0.73	0.801452281	0.531	0.660241518	0.783	0.856916783	0.665	0.609	0.777	0.689563982	0.616	0.21	0.741	0.83041564	0.904	0.21	0.514	0.289	0.701	0.657	0.797	0.781976394	0.842	0.679595894	0.739	0.832003099	1.404	1.018	0.622	0.714	0.911	0.45	0.723	0.797	0.734	0.55	0.57	0.627	0.966	0.862	0.836
467	337.7848919	466.1634869	468.1700978	232.1051669	2.00661091	10135.18919	1	1	1.365	1.562	0.87	0.847	0.48	0.441	0.548	0.589	0.729	0.654	0.747	0.713	0.546	0.425	1.259	1.299	0.891	0.608	0.991	0.966	0.987	1.111	0.538	0.56	0.71	0.715	0.381	0.375	0.881	0.875	0.63	0.404	0.405	0.376	0.374	0.709	0.623	0.68	0.744	0.704	0.712
468	337.9189796	339.1367907	341.143107	105.0784707	2.006316305	17173.0068	1	1	2.381	1.636	2.662	1.545	1.902	1.802	1.491	1.511	1.337	1.313	1.704	1.398	4.887	1.731	2.82	1.661	1.532	2.622	1.214	1.859	3.107	2.434	2.538	2.066	9.99	1.849	1.75	1.477	2.574	1.543	1.747	1.059	1.588	1.65	5.386	1.514	1.034	1.084	1.886	1.866	1.147
471	339.343	411.1042577	413.1108123	177.0459377	2.006554626	16784.66667	1	1	0.348	0.441	0.141	0.1	0.226	0.188	0.109	0.1001	0.496	0.115	0.905	0.815157172	0.579	0.424	0.318	0.268	0.383	0.109209377	0.12	1.977	0.344	0.378	0.236	0.262	0.611	0.777	0.525	0.567	0.161	0.206	1.594	1.238	0.12	0.12	0.12	0.38	0.12	0.146	0.208	0.198	1.348
472	340.711	346.1198131	348.1265686	112.0614931	2.006755442	1916	1	1	1.401	2.209	1.01	1.078	1.096	1.386	1.33	1.383	1.212	1.035	0.988	1.096	0.943	1.308	1.15	1.546	1.411	1.558	1.019	1.371	1.864	2.071	2.013	1.783	0.801	1.279	0.631	0.974	0.824	0.784	1.777	5.65	1.435	1.758	1.235	1.141	2.24	2.267	1.551	1.947	0.644
473	341.08	384.1112988	386.1171658	150.0529788	2.005867002	12794.80247	1	1	0.335	0.265	2.475	1.802	0.581	0.425	3.133	2.166	0.377	0.272	0.638	0.423	0.567	0.462	0.401	0.336	1.813	0.461	0.343	0.316	0.111779118	0.16827598	0.492	0.331	0.517	0.537	0.323	0.336	1.002	1.057	0.288	0.363	0.419	0.414	0.462	0.435	1.796	1.766	2.018	2.027	1.355
474	341.674	361.1179565	363.1223381	127.0596365	2.00438164	5626	1	1	2.514	1.774	2.391271026	1.487	2.022	1.626	1.32	1.613	1.231	1.156	1.903	1.373	4.451	1.79	2.532	1.687	1.607	2.785	1.045	2.007	3.261	2.345	2.397	2.003	9.99	1.913	1.738	1.47	2.33	1.612	1.615	0.988	1.671	1.537	5.654	1.528	1.005	1.081	1.72	1.87	1.111618758
475	341.911051	380.1269371	382.133551	146.0686171	2.006613862	25688.92857	1	1	0.801	0.848	1.022	0.961	1.034	0.953	1.292	1.217	0.563	0.46	0.778	0.611	1.099	1.238	0.497	0.585	0.584	0.847	0.882	0.96	0.835	0.778	0.721	0.639	0.837	0.913	0.45	0.382	1.163	1.124	0.548	0.322	1.431	1.252	1.352	0.676	0.503	0.563	0.656	0.735	0.707
477	342.691	339.1002838	341.1069086	105.0419638	2.006624856	4342	1	1	0.802	0.933	0.764	0.631	0.931	0.943	0.898	0.747	0.859	0.67	0.692	0.679	1.02	1.065	0.828	0.762	0.69	0.733	0.829	0.779	0.837	0.704	0.979	0.918	0.968	1.072	0.774	0.728	0.762	0.823	0.985	0.709	1.024	1.025	0.971	0.732	0.527	0.513	0.711	0.795	0.624
478	342.705	367.0924236	369.0993383	133.0341036	2.006914694	4316	1	1	1.103	0.753	1.168	0.575	1.54	0.784	1.481	0.587	1.317	0.858	1.088	0.505	1.621	0.872	1.328	0.461	0.914	0.677	1.403	0.518	1.262	1.284	1.401	1.667	1.124	1.211	0.839	0.732	0.661	0.982	0.85	1.667	0.996	0.896	0.928	0.92	0.438	0.72	0.886	0.937	0.552
480	342.9576667	337.1566186	339.1642092	103.0982986	2.00759059	10845.11111	1	1	0.558	0.622	0.838	0.766	0.865	0.761	0.67	0.602	0.743	0.76	0.822	0.621	1.012	0.779	0.778	0.641	0.315	0.562	0.742	0.69	1.181	1.591	0.47	0.442	0.805	0.871	1.067	1.216	0.678	0.71	0.611	0.649	0.99	1.001	0.973	0.689	0.337	0.354	0.357	0.362	0.316
481	344.7549741	317.1313299	319.1378842	83.07300991	2.006554253	6514.327044	1	1	0.94	0.886	1	0.869	0.928	0.862	0.919	0.881	0.94	0.863	0.996	0.841	1.061	0.776	0.991	0.884	0.926	0.828	1	0.787	0.946	0.87	0.957	0.849	0.933	0.83	0.973	0.834	0.95	0.87	0.867	0.832	0.868	0.814	0.906	0.923	0.855	0.859	0.889	0.838	0.884
482	344.809129	470.0360288	472.04262	235.9777088	2.006591229	7924.451613	1	1	0.461	0.265	0.468	0.229	0.333	0.198	0.354	0.219	0.14	0.262	0.304	0.257	0.14	0.258	0.366	0.283	0.331	0.272	0.39	0.237	0.373	0.262	0.14	0.268	0.331	0.385	0.296	0.265	0.311	0.309	0.347	0.448	0.432	0.363	0.282	0.283	0.425	0.497	0.493	0.543	0.479
483	345.2626667	335.1281925	337.134016	101.0698725	2.005823557	19185.33333	1	1	0.543	0.155	0.577	0.149	0.584	0.179	0.335	0.122	0.407	0.139	0.208	0.124	0.381	0.14	0.485	0.188	0.323	0.208	0.542	0.185	0.614	0.184	0.232	0.165	0.232	0.159	0.292	0.133	0.276	0.358	0.201	0.316	0.187	0.17	0.256	0.348	0.26	0.164	0.267	0.431	0.277
484	345.563	350.1525247	352.1592778	116.0942047	2.006753104	3612	1	1	0.805	1.219	1.969	2.641	1.52	1.225	0.853	0.832	1.078	1.156	1.176	1.162	1.319	1.469	0.967	0.972	0.636	1.006	1.001	0.926	4.77	4.827	1.42	1.767	1.086	1.441	0.974	1.036	1.568	1.309	1.152	1.434	1.005	1.371	1.678	1.447	0.827	0.821	0.922	0.847	0.807
485	345.6950909	513.1867515	515.1956858	279.1284315	2.008934305	3693.5	1	1	2.702	1.944612209	2.835	1.7	2.948	2.428571274	3.017	1.480397892	2.079	1.501	2.86	1.833	2.812	1.813801368	3.081	1.821191831	3.049	1.474590867	3.004	1.573491163	2.775	1.117	1.906	1.969707803	2.984	0.63	3.074	1.525	3.517	3.271	2.513	2.457	1.878	1.785	2.558	3.163	1.839	1.742	2.565	2.388	2.539
486	345.987	431.1268211	433.133766	197.0685011	2.006944843	2948.666667	1	1	0.71	0.979	0.592	0.614	3.775	3.758	0.595	0.384	0.684	0.732	0.569	0.341	1.156	0.961	0.787	0.439029144	0.377	0.421786413	0.625	0.424	0.23	0.23	0.605	0.482839488	0.413	0.416	0.659	0.79	0.583	0.795	0.403	0.18	1.164	1.313	1.242	0.511	0.454	0.35	0.23	0.179	0.23
488	346.878	519.1546473	521.1616956	285.0963273	2.007048322	2294	1	1	0.652	0.56799374	0.969	0.857	0.725	0.793	0.854	0.466	0.636	0.569	0.63	0.303	0.519	0.56	0.728	0.816886425	0.523	0.621930424	0.602	0.774	1.32	0.969	1.491	0.903	0.897	0.927	0.804	0.802	0.63	0.719	0.555	0.393	0.721	0.919	0.873	0.588	0.715	0.745	0.612	0.545	0.554
489	347.359	442.1061333	444.1128257	208.0478133	2.006692414	4274.666667	1	1	0.708	0.698	0.785	0.725	0.798	0.561	0.736	0.639	0.643	0.757	0.617	0.509	0.865	0.753	0.901	0.834	0.937	0.877	0.814	0.834	1.224	0.97	1.086	1.004	1.134	1.066	0.999	0.916	0.873	0.914	0.577	0.661	0.723	0.822	0.888	0.766	0.837	0.788	0.74	0.821	0.622
490	347.510693	478.1273933	480.1338771	244.0690733	2.006483856	212292.4279	1	1	0.646	0.652	0.7	0.704	0.746	0.607	0.689	0.546	0.651	0.602	0.583	0.482	0.661	0.616	0.893	0.776	0.731	0.748	0.777	0.805	1.031	0.963	1.089	0.981	1.077	0.986	0.939	0.991	0.847	0.799	0.65	0.545	0.757	0.754	0.829	0.668	0.719	0.711	0.805	0.715	0.627
493	347.858	461.0796426	463.0859005	227.0213226	2.006257825	2912	1	1	0.536914955	0.829	0.580086214	0.615	0.389013698	0.547	0.431238089	0.589	0.635361735	0.466	0.409504185	0.615	0.709	0.767	0.574345821	0.599	0.679066083	0.723	0.383265522	0.504	0.752925113	0.688	0.687	0.678	0.81	0.698	0.516	0.78	0.587312113	0.804247628	0.509191154	0.514251894	0.553180429	0.617	0.389108646	0.59958724	0.602	0.893	0.688976046	0.25	0.676593524
495	348.203	482.1342831	484.1365076	248.0759631	2.002224577	2458.333333	1	1	5.177	4.54027435	4.579	4.036	4.883	7.161	5.279	6.661	4.211	4.496	4.611	4.19973363	4.509	7.499	6.114	5.987	6.108	5.878	5.174	5.946	5.195	5.95	3.348	4.603591594	4.876	3.822	4.809	3.649	4.932	4.243	6.014	3.845	3.713	4.12	5.272	4.513	5.715	6.845	4.337	9.99	4.268
498	348.554	388.0956224	390.1025528	154.0373024	2.006930369	3265.333333	1	1	0.735	0.808	0.9	0.677	0.769	0.562	0.752	0.718	0.992	0.652	0.67	0.617156678	0.854	0.521	0.917	1.333	0.86	0.842	0.757	0.865	0.968	0.92502218	1.259	1.324	0.902	1.393	1.089	0.957	0.869	0.757	0.656	0.661	0.809	0.796	1.008	0.765	0.638	0.817	0.915	0.829	0.628
503	349.6545263	398.1262321	400.132762	164.0679121	2.006529901	163299.1474	1	1	1.304	1.116	1.246	0.989	1.76	1.403	0.754	0.566	1.014	0.904	1.453	1.052	0.976	0.761	1.329	1.063	1.203	1.093	1.177	1.059	1.659	1.426	1.342	1.157	1.555	1.433	1.386	1.397	0.1	0.1	0.646	0.616	1.457	1.478	1.651	1.456	1.202	1.098	1.787	1.765	1.658
505	350.0562692	522.2010837	524.2075022	288.1427637	2.006418516	22052.5641	1	1	0.138	0.138	0.268	0.248	0.34	0.292	1.417	1.395	0.212	0.214	0.132	0.12	0.223	0.238	0.1	0.108	0.422	0.143	0.209	0.202	0.1001	0.1001	0.1	0.1001	0.255	0.288	0.222	0.206	0.516	0.531	0.153	0.101	0.464	0.453	0.475	0.311	0.728	0.679	0.466	0.452	0.216
506	350.594338	348.1007245	350.1073078	114.0424045	2.006583217	858802.2441	1	1	0.909	0.923	0.754	0.713	1.113	1.046	1.149	1.029	0.845	0.793	0.926	0.886	1.011	1.128	0.989	1.016	0.901	0.979	1.014	1.07	0.924	0.937	0.871	0.786	1.062	1.286	0.827	0.916	0.565	0.519	0.989	1.726	1.027	0.999	0.988	0.823	0.668	0.695	1.236	1.208	0.878
507	350.70675	540.1910463	542.1971711	306.1327263	2.006124827	8762.75	1	1	0.713	1.012	0.479	0.513	0.561	0.751	0.527	0.666	0.512	0.549	0.668	0.59	0.551	0.765	0.445	0.538	0.571	0.581	0.463	0.562	0.241	0.186	0.3	0.262	0.55	0.938	0.331	0.434	0.516	0.568	0.558	0.529	0.845	0.851	0.695	0.41	0.579	0.622	0.425	0.486	0.399
509	351.2158333	473.1826295	475.1892136	239.1243095	2.006584067	3490.555556	1	1	0.86	1.128	0.901	0.776	0.955	0.88	1.157	0.758	0.916	0.822	0.885	0.89518938	0.927	1.037	0.973	1.273	1.02	1.196	1.022	0.933	1.131	1.22	1.071	1.289	0.828	1.004	0.558	0.689	0.525	0.673	0.937	1.212	0.893	0.851	1.036	0.809	1.055	0.927	1.297	1.427	0.808
510	352.0825728	334.121515	336.1281476	100.063195	2.006632657	4422020.094	1	1	1.098	0.971	0.957	0.753	0.916	0.932	1.036	0.849	0.982	0.881	0.848	0.716	0.922	0.942	1.004	1.057	1.028	1.028	1.136	1.132	1.183	1.064	1.082	1.031	0.767	1.043	0.578	0.733	0.584	0.591	0.929	1.417	1.023	0.998	0.912	0.902	0.959	0.953	1.365	1.308	0.758
512	354.4865535	436.153288	438.1598457	202.094968	2.006557711	43110.7907	1	1	0.691	0.595	0.631	0.53	0.727	0.662	0.768	0.536	0.678	0.534	0.786	0.641	0.821	0.726	0.554	0.437	0.595	0.417	0.855	0.6	0.517	0.407	0.509	0.475	0.997	1.399	0.369	0.431	0.528	0.563	0.52	0.514	1.417	1.152	1.417	0.521	0.393	0.34	0.466	0.402	2.403
513	355.4965865	299.5991842	301.6058712	131.0817284	2.006687016	8568.692308	2	2	0.618	0.654	0.613	0.614	0.52	0.702	0.344	0.419	0.224	0.407	0.417	0.382	0.418	0.369	0.339	0.499	0.455	0.35	0.488	0.574	0.359	0.42	0.361	0.626	0.333	0.542	0.364	0.631	0.333	0.439	0.456	0.216	0.782	0.637	0.564	0.602	0.57	0.678	0.432	0.1001	0.465
514	356	415.1323333	417.1384349	181.0740133	2.006101621	13968	1	1	0.371	0.153	0.212	0.132	0.312	0.145	0.254	0.139	0.353	0.154	0.427	0.195010887	0.518	0.304	0.374	0.491	0.436	0.215	0.284	0.202074992	0.369	0.288	0.347	0.205717878	0.27	0.297	0.645	0.417	0.318	0.403	0.202	0.117	0.826	0.825	0.355	0.308	0.501	0.526	0.559	0.587	0.587
515	356.1401429	353.5661181	355.5727648	239.0155962	2.0066467	3581.428571	2	2	0.275277161	0.966	0.747	0.832	0.379412121	0.55	0.483989613	0.723433081	1.078481576	0.840071735	0.386	0.92	0.36	0.547	0.51276285	0.929	0.688	0.819	0.31822372	0.724089203	0.417343456	0.6	0.407416502	0.715	1.217345847	1.047	0.444	0.645	0.53	0.722	0.241762562	0.326	0.677	0.493	0.356	0.966	1.025	0.993	0.743	0.618814044	1.109
517	356.2333777	428.100381	430.1071467	194.042061	2.006765658	8586.138298	1	1	0.561	0.818	0.476	0.542	0.558	0.499	0.561	0.396	0.477	0.552	0.485	0.462	0.594	0.736	0.599	0.755	0.706	0.7	0.601	0.693	0.871	0.595	0.871	0.703	0.739	0.804	0.747	0.739	2.507	1.833	0.702	0.362	0.492	0.527	0.512	0.875	0.517	0.465	0.816	0.625	0.734
518	356.27854	465.1798031	467.1861624	231.1214831	2.006359277	4759.84	1	1	0.951	1.374	1.221	1.129	1.218	1.084	0.977	0.837	0.902	0.701	1.059	0.692	2.059	1.828	0.684	0.405	0.498833565	0.597	1.009	1.467	1.398	0.969558289	0.82	0.389	1.437	0.722	0.926	1.192	1.278	1.795	1.612	1.546	0.92	0.962	1.291	0.79	0.878	1.026	1.06	1.93	0.159845821
519	356.3312941	362.0674835	364.0741821	256.0183271	2.006698615	3133.058824	2	2	0.456	0.638	1.154	0.838	0.18	0.854	0.18	0.768	0.18	0.363	0.383	0.18	0.18	0.341	0.18	0.832	0.559	0.78	0.18	0.18	0.18	0.457017309	0.18	0.81	0.18	0.998	0.18	0.766	0.18	0.759	0.602	0.446	0.796	0.834	0.348	0.753	0.881	0.886	0.676	0.18	0.886
520	356.4983365	389.1271967	391.1338959	155.0688767	2.006699195	156193.7692	1	1	1.28	0.1	1.191	0.376	2.051	0.1	0.255	0.417	0.403	0.229	1.845	0.13	2.532	0.424	1.99	0.372	0.202	0.56	2.74	2.869299845	0.902	0.355	1.441	0.1	3.943	3.872	2.046	0.808	4.326	3.229	4.343	4.786	0.69	0.614	1.816	1.966	0.422	0.269	0.335	0.422715007	0.184
521	356.5495652	394.1418185	396.1494206	160.0834985	2.007602104	10987.30082	1	1	0.793	1.048	0.59	0.68	0.581	0.642	0.841	0.598	0.633	0.51	0.544	0.573	0.726	0.687	0.424	0.333	0.753	0.486	0.621	0.988	1.24	1.055	0.781	0.498	0.634	0.839	0.527	0.695	0.688	0.702	0.598	0.428	0.884	0.83	0.59	0.625	0.587	0.639	0.507	0.929	0.824
522	356.7136824	342.0459878	344.0521796	107.9876678	2.006191782	11980.54118	1	1	0.944	2.158	1.398	2.71	2.616	1.923	0.859	1.548	1.839	1.557	2.865	1.94	1.339	1.101	2.277	2.166	2.02	1.873	1.29	1.701	1.184	2.12	1.622	2.309	2.259	2.553	2.398	2.255	1.245	2.628	0.916	2.588	2.631	1.346	1.555	2.058	1.376	0.915	1.357	0.958	0.977
523	356.9186667	498.1364724	500.1427139	264.0781524	2.006241423	2806.666667	1	1	1.038	0.98	0.776	0.782	0.655	0.763082719	1.718	2.279	0.81	0.618	0.713	0.761406154	0.754	0.789	1.468	1.836	0.754	0.714	0.964	0.967	1.143	1.045	0.826	0.814811339	0.879	0.985	0.527	0.63	0.63	0.63	0.641	0.63	0.607	0.636	0.708	0.921	0.411	0.506	0.64	0.629	0.919
524	357.07	394.1383452	396.1469564	160.0800252	2.008611288	8150	1	1	0.794526795	1.075	0.590193417	0.607	0.628782055	0.705	0.807271534	0.754	0.795674089	0.541	0.706376327	0.553	0.725633661	0.647	0.749	0.613	0.792983858	0.588	0.689690987	0.763	1.089374795	1.057	0.549	0.544	0.606549035	0.811	0.648529791	0.701	0.675068641	0.757524414	0.620970357	0.573842776	0.934	0.811	0.666	0.682391505	0.46	0.955	2.244965859	1.166	0.823367253
526	361.60538	309.0900685	311.0968979	75.03174851	2.006829417	17951968.72	1	1	0.88	0.995	0.638	0.624	0.867	0.825	0.84	0.739	0.878	0.695	0.647	0.58	0.914	1.108	0.692	0.71	0.647	0.875	0.696	0.83	0.753	0.78	1.136	1.305	0.684	0.852	0.827	0.91	0.617	0.624	1.024	0.887	0.949	0.964	0.85	0.727	0.612	0.686	0.839	0.825	0.472
527	362.1813333	309.5122902	311.5206284	75.45397018	2.008338271	1260892.222	1	1	0.739	1.063	0.541	0.683	0.895	0.867	0.91	0.801	0.809	0.725	0.559	0.639591387	0.831	1.16	0.734	0.766	0.586	0.946	0.614	0.787	0.821	0.845	1.305	1.197	0.755	0.721	0.841	0.766	0.667	0.684	1.129	0.92	0.889	0.973	0.886	0.773	0.656	0.627	0.677	0.826	0.482
529	368.331262	418.0811671	420.0876634	184.0228471	2.006496329	23334.07487	1	1	0.998	0.792	1.412	1.148	0.677	0.541	0.612	0.505	0.617	0.644	0.906	0.738	0.434	0.311	1.084	0.806	0.779	0.905	1.058	0.926	0.863	0.793	0.567	0.436	0.841	0.784	1.115	1.093	1.012	0.93	0.436	0.995	0.651	0.572	0.579	1.023	0.842	0.86	0.877	0.841	1.426
531	369.2691667	575.2048796	577.2115221	341.1465596	2.006642423	4207.333333	1	1	0.511	0.591	0.894	1.02	0.59	0.336	0.362	0.365	0.389	0.219	0.635	0.374	0.672	0.575	0.564	0.464	0.457	0.272	0.492	0.535	0.8	0.8	0.8	0.8	0.802	0.91	0.397	0.39	0.391	0.556	1.003	0.8	0.8	0.271	0.277	0.367	0.516	0.558	0.76	0.757	0.294
532	369.329893	344.1058128	346.1123769	110.0474928	2.00656416	175528.0279	1	1	1.207	1.045	0.996	0.838	1.285	1.069	1.291	0.934	1.285	1.087	1.203	0.828	1.426	1.138	1.27	1.185	0.844	1.225	1.27	1.334	1.348	1.147	1.402	1.052	1.274	1.462	0.712	1.046	0.513	0.748	0.815	1.769	1.021	1.027	0.955	0.837	0.735	0.702	1.017	0.946	0.526
533	369.393	473.0802303	475.0872059	239.0219103	2.006975628	8324	1	1	0.985	0.865	0.577206556	0.765	0.639273852	0.83	0.72523557	0.571	0.635	0.552	0.77	0.68	0.665	0.809	0.597	0.687	0.62	0.69	0.464	0.748	0.810009241	0.661	0.692	0.627	0.55	0.76	0.633	0.721	0.908	0.63	0.703	0.732	0.594954167	0.711060149	0.514	0.67	0.762	0.711060149	0.566	0.711060149	0.422
536	370.4696667	412.1058411	414.1161878	178.0475211	2.010346693	5562.666667	1	1	0.493	0.377	0.689	0.526	0.626	0.453	0.535	0.385	0.553	0.513	0.653	0.452	0.666	0.518	0.666	0.359	0.577	0.461	0.578	0.335	0.685	0.441	0.647	0.674	0.626	0.519	0.623	0.44	7.78	8.64	0.498	0.842	0.585	0.541	0.618	0.629	0.546	0.431	0.488	0.729	0.617
538	370.8412643	317.1314992	319.1381516	83.07317918	2.00665238	6353.314286	1	1	0.93	0.867	1.059	0.908	0.978	0.868	0.941	0.871	0.954	0.842	1.029	0.95	1.065	0.859	0.994	0.866	0.914	0.854	1.099	0.84	1.018	0.869	0.976	0.889	0.98	0.832	0.991	0.84	0.946	0.887	0.884	0.824	0.876	0.862	0.931	0.946	0.871	0.866	0.884	0.853	0.907
539	370.9513715	464.1487373	466.155482	230.0904173	2.006744712	4646.101518	1	1	0.58	0.578	0.575	0.771	0.807	0.675	0.585	0.475	0.752	0.713	0.827	0.699	0.816	0.838	0.676	0.689	0.544	0.486	0.702	0.743	0.634	0.676	0.571	0.435	0.698	0.716	0.731	0.674	0.625	0.657	0.573	0.663	1.057	1.053	1.022	0.627	0.514	0.53	0.565	0.61	0.57
541	371.7032454	398.1262395	400.1327748	164.0679195	2.006535297	398691.7046	1	1	1.294	1.276	1.24	1.161	1.777	1.479	0.747	0.6	1.004	0.94	1.448	1.203	0.963	0.774	1.325	1.152	1.164	1.267	1.161	1.144	1.687	1.545	1.33	1.211	1.538	1.501	1.387	1.448	0.1	0.1	0.64	0.614	1.47	1.48	1.627	1.448	1.206	1.1	1.784	1.765	1.686
544	372.1559155	365.1161908	367.1226522	131.0578708	2.006461333	49225.29577	1	1	0.9	0.558	0.72	0.578	0.683	0.621	1.048	0.937	0.776	0.779	0.716	0.445	0.629	0.638	0.892	0.844	0.933	0.649	0.695	0.703	1.046	0.919	0.849	0.781	0.995	0.901	1.151	0.852	0.979	0.861	0.718	0.8	0.817	0.987	0.956	0.898	1.052	1.053	0.785	0.751	0.768
545	372.240073	334.121303	336.1279652	100.062983	2.006662175	7332.896247	1	1	1.084	0.959	1.02	0.759	0.991	0.967	1.11	0.854	0.965	0.869	0.832	0.754	0.913	0.909	1.038	1.05	1.033	1.049	1.145	1.141	1.221	1.065	1.083	1.016	0.877	1.064	0.61	0.79	0.574	0.575	0.936	1.452	1.062	1.064	0.927	0.978	1.011	0.976	1.405	1.255	0.783
546	372.5088936	582.1897768	584.1961479	348.1314568	2.006371168	2964.042553	1	1	0.553	0.619	0.677	0.535	0.673	0.557	0.642	0.569	0.763	0.625	0.618	0.532	0.747	0.897	0.703	0.703	0.689	0.741	0.764	0.742	0.988	0.763	0.925	0.957	0.846	0.942	0.808	0.949	0.84	0.711	0.63	0.384	0.797	0.778	0.774	0.666	0.593	0.623	0.875	0.794	0.457
547	372.6787925	452.1844915	454.1910991	218.1261715	2.006607543	16830.9434	1	1	0.535	0.559	0.864	0.813	0.995	0.819	0.483	0.463	0.587	0.559	0.736	0.602	1.006	0.913	0.967	0.751	0.176	0.401	0.724	0.796	0.243	0.254	0.203	0.206	0.898	0.977	0.977	1.108	0.8	0.868	0.677	0.292	0.708	0.586	0.707	1.076	0.295	0.324	0.366	0.354	0.302
549	373.0099091	437.1377705	439.1439141	203.0794505	2.006143565	3626.181818	1	1	0.732	0.623	0.71	0.571	0.823	0.626	0.885	0.517	0.833	0.655	0.721	0.526952924	1.058	0.572	0.975	0.605	0.859	0.679	0.824	0.68	1.44	0.936	0.964	0.83	0.955	0.892	1.013	0.913	2.402	1.986	0.858	0.591	0.863	0.603	0.729	0.839	0.858	0.833	1.141	0.875	0.893
550	373.2070109	309.0899862	311.0965944	75.03166624	2.006608207	261361.413	1	1	0.88	0.986	0.615	0.606	0.82	0.768	0.839	0.738	0.86	0.703	0.645	0.58	0.915	1.061	0.687	0.702	0.646	0.869	0.671	0.706	0.76	0.75	1.198	1.269	0.697	0.857	0.763	0.864	0.618	0.623	1.049	0.866	0.955	0.966	0.813	0.724	0.621	0.584	0.81	0.787	0.468
553	374.277	445.1541416	447.1599171	211.0958216	2.005775539	2892	1	1	0.909	0.654	0.88	0.882	0.325	0.438	0.611	0.752	0.432	0.628	0.349	0.61	0.257	0.465	0.562	0.825	0.774	0.678	0.712	0.829	0.316	0.435	0.379	0.553	0.431	0.739	0.238	0.248	0.3	0.243	0.473	1.077	0.392	0.408	0.366	0.539	0.978	0.794	1.249	1.141	0.74
554	374.6314083	422.1738939	424.1804687	188.1155739	2.006574789	7018.994083	1	1	0.921	0.797	1.038	1.026	0.615	0.756	1.06	0.822	0.968	0.906	1.507	1.23	0.44	0.551	0.512	0.664	0.496	1.216	0.457	1.112	0.636	0.668	0.596	0.536	0.82	0.778	0.913	0.696	0.587	0.765	0.721	0.255	0.878	1.019	1.184	1.134	1.031	0.995	0.548	0.44	0.609
555	375.1508465	402.0862084	404.0927072	168.0278884	2.006498848	135302.7349	1	1	0.93	0.917	1.333	1.264	0.793	0.65	0.686	0.6	0.723	0.739	1.085	0.927	0.548	0.422	1.329	1.045	1.03	1.194	1.203	1.232	1.022	0.989	0.665	0.566	1.067	0.989	1.294	1.285	1.174	1.104	0.478	0.918	0.542	0.584	0.697	1.202	0.813	0.83	0.8	0.809	1.248
557	375.3230996	381.1472965	383.1538773	147.0889765	2.006580833	299144.0155	1	1	0.626	0.715	0.725	0.67	0.627	0.551	0.654	0.549	0.578	0.481	0.636	0.608	0.601	0.555	0.753	0.707	0.685	0.629	0.752	0.749	0.974	0.941	0.917	0.727	0.661	0.732	0.873	0.922	0.604	0.65	0.845	0.556	0.466	0.583	0.504	0.553	0.661	0.668	0.879	0.894	0.874
558	375.6052238	351.1367759	353.1433581	117.0784559	2.006582235	13563.42857	1	1	0.681	0.705	1.006	0.912	0.684	0.709	0.698	0.703	0.78	0.773	0.607	0.553	0.737	0.713	0.728	0.655	0.982	0.716	0.818	0.83	0.805	0.848	0.72	0.71	0.829	0.882	0.642	0.793	0.636	0.619	0.651	0.825	0.9	0.963	0.738	0.588	0.524	0.556	0.596	0.807	0.587
560	377.1597089	423.1215624	425.1279982	189.0632424	2.006435807	22651.11737	1	1	1.709	1.033	1.567	1.508	2.038	0.715	1.686	1.303	1.439	3.3	2.931	2.34	2.826	1.097	2.432	0.982	0.811	0.495	0.591	0.717	1.977	2.266	1.205	1.299	3.405	1.11	3.442	3.705	3.589	2.79	0.401	0.419	0.96	0.938	2.433	2.228	0.394	0.414	0.637	0.577	0.57
561	377.1968769	442.1166082	444.1229242	208.0582882	2.006315949	3880.123077	1	1	0.507	0.183	0.36	0.178	0.227	0.217	0.221	0.261	0.24	0.316	0.246	0.249	0.294	0.349	0.227	0.252	0.244	0.222	0.239	0.251	0.388	0.388	0.472	0.338	0.304	0.342	0.273	0.261	0.798	0.694	0.252	1.846	0.304	0.149	0.223	0.287	0.328	0.165	0.389	0.238	0.249
563	377.7463163	363.1731607	365.1797179	129.1148407	2.006557193	79161.80465	1	1	0.588	0.579	0.588	0.533	0.429	0.416	1.133	0.985	0.531	0.548	1.296	1.111	0.492	0.477	1.087	1.172	0.475	1.288	0.503	0.488	0.878	0.843	0.715	0.613	0.64	0.774	0.526	0.622	0.339	0.396	0.395	0.628	0.681	0.749	0.677	0.468	1.287	1.268	0.576	0.612	0.515
564	377.7893285	427.0986226	429.1050908	193.0403026	2.006468243	5064	1	1	0.906	0.904	0.654	0.563	0.876	0.815	0.402	0.435	0.82	0.795	0.885	0.734	0.695	0.65	0.862	0.597	0.721	0.493	0.698	0.646	0.665	0.478	0.834	0.651	0.664	0.973	0.88	0.828	0.838	0.786	0.752	0.675	0.58	0.486	0.539	0.987	0.622	0.482	0.515	0.531	0.834
565	378.6	842.254615	844.2620083	608.196295	2.007393241	1852	1	1	1.273	0.986	1.294254869	0.837	1.24622965	1.041	1.251	0.934	1.234	1.014	1.257068708	1.45	1.381	1.498	1.526	1.623	1.325	1.225	1.526	1.441	2.062	1.453	1.747	1.527	1.056	1.136	1.353	1.499	2.277	2.314	1.086	2.369	1.222	1.138	1.229	1.273	1.393	1.427	1.195	1.612	1.075
566	378.678	776.2863221	778.2937358	542.2280021	2.007413756	2866	1	1	0.37	0.347	0.353	0.375835939	0.335	0.285	0.444	0.13	0.375	0.472	0.445	0.289	0.388	0.459	0.37	0.364	0.466	0.596	0.554	0.53	0.406	0.448553972	0.38	0.13	0.303	0.13	0.448	0.452	0.329	0.221	0.417	0.447	0.58	0.573	0.605	0.39	0.397	0.36	0.478	0.317	0.289
567	379.246	899.3686732	901.3752228	1330.620706	2.006549573	2027.2	2	2	0.321	1.855	0.485	1.266	0.988	1.523	0.363	0.855	0.792	0.848	1.037	0.804	0.226	0.937	0.693	1.658	1.196	0.963	0.545	1.104	0.357	1.565	0.887	1.994	0.594	1.437	1.165	0.994	0.342	1.7	0.431	1.67	2.382	2.286	0.4	1.104	0.989	0.891	0.618	0.781	0.632
570	379.6601429	612.2291535	614.2341199	378.1708335	2.004966427	3476.285714	1	1	0.727	3.22	0.808	2.249	1.679	2.25	0.359	1.897	1.335	1.183	1.846	1.326	0.485	1.424	1.241	2.526	2.095	2.002	0.682	1.838	0.472	2.615	1.096	2.971	1.025	2.756	1.61	1.639	0.699	3.015	0.521	1.791	3.443	3.394	0.767	1.989	1.89	1.667	0.983	1.164	0.993
573	379.7011074	367.0953551	369.1019648	133.0370351	2.006609696	171770.7107	1	1	0.53	0.158	0.344	0.1	0.167	0.18	0.213	0.187	0.185	0.184	0.164	0.131	0.215	0.263	0.146	0.124	0.1	0.124	0.162	0.144	0.203	0.134	0.281	0.179	0.193	0.211	0.137	0.116	0.132	0.137	0.2	0.503	0.232	0.286	0.238	0.171	0.1	0.127	0.179	0.191	0.118
574	379.8604	899.3667315	901.374307	665.3084115	2.007575505	2604.4	1	1	0.321	1.855	0.485	1.32	0.988	1.523	0.363	0.855	0.792	0.848	1.037	0.862	0.226	0.807	0.693	1.658	1.196	0.963	0.545	1.104	0.357	1.565	0.887	2.087	0.594	1.458	1.165	0.94	0.342	1.7	0.431	1.67	2.382	2.286	0.4	1.104	0.989	0.891	0.618	0.781	0.632
575	379.9071111	385.1278493	387.1344353	151.0695293	2.00658597	54580.14815	1	1	1.012	0.781	0.703	0.529	0.751833261	0.735	0.699	0.558	0.743	0.661	0.824	0.786	0.678	0.664	0.946	0.948	0.826	0.821	0.99	0.975	1.034	0.982	1.01	0.79	0.508	0.591	0.776	0.772	0.631	0.687	0.649	1.432	0.779	0.851	0.911	0.726	0.899	0.923	0.702	0.684	0.528
576	379.9598942	522.1535317	524.1596759	288.0952117	2.00614424	9027.730769	1	1	2.044	0.921	2.006	2.69	3.92	0.683	0.631	0.499	0.693	2.995	3.144	2.577	4.857	1.131	4.005	1.058	0.428	0.887	0.834	1.172	2.091	1.581	2.681	1.487	5.101	0.991	3.865	3.281	4.425	3.506	0.649	1.215	1.089	1.187	3.745	4.133	0.267	0.249	0.412	0.433	0.364
577	380.023314	326.1052911	328.1119069	92.04697109	2.006615827	7366.209302	1	1	0.372	0.205	0.664	0.385	0.791	0.574	0.381	0.25	0.568	0.437	0.409	0.245	0.555	0.499	0.917	0.587	0.199	0.51	0.474	0.417	1.047	0.808	1.107	0.718	0.702	0.565	0.45	0.373	1.344	0.995	0.573	0.955	0.309	0.3	0.448	0.434	0.374	0.49	0.705	0.669	0.22
578	380.048	898.8677361	900.8735757	664.8094161	2.005839654	2110.666667	1	1	0.346	1.658	0.52	1.275	0.864	1.272	0.413	0.936	0.756	0.847	1.109	0.776	0.24	1.03	0.55	1.705	1.236	1	0.488	0.985	0.29	1.321	0.88	1.495	0.474	1.229	0.926	0.934	0.359	1.264	0.221	1.088	1.849	2.127	0.422	1.155	1.015	1.131	0.587	0.746	0.681
579	380.0516269	392.1634382	394.1699574	158.1051182	2.006519147	7667.430052	1	1	0.626	0.739	0.725	0.708	0.698	0.611	0.619	0.606	0.739	0.718	0.826	0.881	0.861	0.91	0.644	0.654	0.669	0.715	0.913	0.965	0.625	0.501	0.441	0.344	0.456	0.614	0.655	0.695	0.455	0.538	0.609	0.584	1.656	1.83	1.582	0.632	0.589	0.573	0.463	0.557	0.447
581	380.2483571	761.3184354	763.324828	527.2601154	2.006392578	4139.357143	1	1	0.898	0.689	0.697	0.523	0.648	0.704	0.628	0.589	0.649	0.88	0.841	0.917	0.771	0.587	0.982	0.845	0.868	0.817	0.875	0.931	1.054	0.896	1.312	0.711	0.424	0.551	0.563	0.937	0.682	0.61	0.625	1.201	0.795	0.688	0.808	0.779	0.873	0.928	0.76	0.624	0.527
583	380.3679131	385.1303231	387.1369373	151.0720031	2.00661418	65383.40268	1	1	0.965	0.767	0.726	0.522	0.752	0.746	0.721	0.579	0.741	0.676	0.828	0.803	0.617	0.653	0.968	0.928	0.816	0.844	0.998	0.975	1.008	0.975	0.991	0.792	0.482	0.593	0.752	0.766	0.617	0.663	0.661	1.43	0.776	0.82	0.91	0.716	0.864	0.873	0.688	0.688	0.516
585	380.6565374	480.1429991	482.1495939	246.0846791	2.006594822	29236.6729	1	1	0.603	0.568	0.786	0.703	0.7	0.554	0.644	0.548	0.589	0.564	0.552	0.433	0.594	0.536	0.862	0.692	0.742	0.683	0.708	0.69	0.989	0.885	1.105	0.949	1.055	0.985	0.874	0.937	0.713	0.664	0.56	0.522	0.813	0.871	0.876	0.632	0.693	0.722	0.71	0.654	0.558
587	380.6966667	778.293119	780.298423	544.234799	2.005303955	2010.333333	1	1	1.71	1.34	1.148	1.214	1.261	1.303	1.084	1.088	1.358	1.208	1.486	1.453	1.389	1.069	1.62	1.166	1.241	1.072	1.395	1.588	1.331	1.048	1.424	0.826	0.93	1.164	1.194	1.58	1.017	1.123	1.28	1.577	2.061	2.132	1.837	1.372	1.355	1.092	1.113	0.98	0.917
589	380.7193889	747.2709091	749.2774242	513.2125891	2.006515071	17748.92593	1	1	0.45	0.439	0.361	0.252	0.388	0.363	0.392	0.288	0.38	0.316	0.419	0.443	0.372	0.311	0.484	0.446	0.408	0.385	0.478	0.468	0.476	0.486	0.542	0.431	0.301	0.274	0.351	0.454	0.297	0.324	0.333	0.676	0.388	0.417	0.434	0.338	0.448	0.495	0.363	0.374	0.308
591	381.0098643	749.2772381	751.2833195	515.2189181	2.006081401	11637.21429	1	1	1.676	1.256	1.48	1.013	1.361	1.347	1.339	1.172	1.403	1.338	1.465	1.446	1.174	1.182	1.665	1.522	1.384	1.543	1.96	1.647	1.953	1.733	2.015	1.581	0.998	1.08	1.487	1.311	1.378	1.238	1.314	2.556	1.37	1.446	1.771	1.345	1.633	1.491	1.226	1.16	0.947
593	381.5920558	456.1318786	458.1383657	222.0735586	2.006487076	165371.8791	1	1	0.561	0.527	0.566	0.444	0.611	0.548	0.579	0.418	0.601	0.504	0.57	0.463	0.686	0.697	0.653	0.596	0.691	0.642	0.659	0.635	0.935	0.834	0.986	0.824	0.739	0.759	0.652	0.725	2.491	2.391	0.717	0.863	0.498	0.491	0.543	0.65	0.602	0.606	0.795	0.804	0.563
595	382.4073636	401.1040897	403.11004	167.0457697	2.005950346	4482.818182	1	1	0.973	0.798	0.756	0.471	0.842	0.688	0.784	0.631	0.811	0.724	0.933	0.774	0.624	0.618	0.938	1.051	0.74	0.882	1.039	0.953	1.025	1.161	0.994	0.861	0.498	0.744	0.78	0.825	0.655	0.665	0.725	1.373	0.937	0.868	0.957	0.778	0.925	0.984	0.703	0.683	0.621
596	382.723	623.0287053	625.0326142	388.9703853	2.003908918	2244.8	1	1	2.162	1.807	2.479768975	1.988	1.31	1.954	1.203	1.539	0.36	1.469	1.185	1.639	1.466	1.393	1.204	2.407	1.899	1.709	1.466	1.198	1.508	2.446	1.771	4.206	1.285	3.105	1.364	1.653	1.661	1.636	1.951	3.408969462	1.508	2.164	1.063	2.128	1.75	1.09	3.222	1.223	3.113
597	382.773	340.0304313	342.037021	105.9721113	2.006589731	3734	1	1	0.907	1.897	1.295	1.83	1.73	1.811	0.829	1.299	1.417	1.276	1.716	1.843	1.023	1.084	1.73	2.068	1.818	1.579	1.005	2.11	1.055	1.875	1.394	2.111	1.741	2.305	2.021	2.401	1.481	2.077	0.912	1.988	1.552	1.709	1.343	1.818	1.256	1.362	1.554	1.258	1.299
602	383.802	483.1441428	485.1486235	249.0858228	2.004480653	6570	1	1	0.657	0.385	0.585	0.415	0.292	0.247	0.341	0.336	0.42	0.238	0.355	0.436	0.405	0.431	0.429	0.393	0.518	0.48	0.435	0.424	0.325	0.506	0.428	0.495	0.413	0.4	0.502	0.412	0.518	0.493	0.368	0.964	0.312	0.299	0.319	0.349	0.299	0.268	0.402	0.339	0.367
605	384.730831	436.1894584	438.196325	202.1311384	2.006866534	11700.05634	1	1	0.579	0.594	0.659	0.609	0.813	0.632	0.931	0.874	0.594	0.549	0.712	0.609	0.736	0.694	1.344	1.343	0.566	0.57	0.807	0.839	1.252	1.197	1.382	1.258	1.283	1.275	1.153	1.069	0.698	0.682	0.966	0.899	0.649	0.708	0.716	0.386	0.561	0.602	0.566	0.646	0.378
606	385.3150294	428.1369522	430.1433631	194.0786322	2.006410915	4441.705882	1	1	0.403	0.26	0.666	0.261	0.646	0.245	1.456	1.476	0.749	0.335	0.369	0.335	0.678	0.272	0.715	0.285	0.552	0.34	2.393	2.154	0.609	0.281	1.294	1.018	1.3	1.332	1.27	0.53	0.496	0.474	1.413	1.582	0.369	0.317	0.404	0.702	0.681	0.252	1.113	1.042	0.938
607	385.3756667	474.0649317	476.072461	240.0066117	2.007529339	4522	1	1	0.804	0.762	0.692	0.665	0.411	0.586	0.482	0.432	0.524	0.441	0.481	0.624	0.511	0.565	0.46	0.603	0.697	0.643	0.485	0.753769547	0.537	0.681	0.512	0.28	0.458	0.933484221	0.481	0.657	0.564	1.16	0.529	1.426	0.534	0.28	0.482	0.832	0.682	0.753769547	0.819	0.753769547	0.969
608	385.4174455	478.1638641	480.1704137	244.1055441	2.006549555	12102.78218	1	1	0.693	0.67	0.476	0.471	0.6	0.52	0.343	0.304	0.521	0.588	0.755	0.717	0.58	0.626	0.466	0.428	0.224	0.386	0.697	0.735	0.349	0.347	0.343	0.314	0.275	0.377	0.437	0.499	0.586	0.601	0.408	0.389	0.98	0.98	1.065	0.426	0.244	0.236	0.146	0.153	0.164
610	385.7994828	552.1899763	554.1961081	318.1316563	2.006131806	3176.896552	1	1	0.12	0.12	0.429	0.571	0.451	0.386	0.442	0.399	0.441	0.385	0.221	0.13525343	0.306	0.363	0.38	0.394	1.182	0.313	0.39	0.404	2.996	3.479	0.912	0.954	1.096	1.035	0.417	0.482	0.481	0.417	0.228	0.12	0.281	0.218	0.343	0.682	0.339	0.167	0.411	0.353	2.065
611	385.9697236	621.0297517	623.0350692	386.9714317	2.005317501	4217.090909	1	1	0.711	0.841	0.666	0.521	0.948	0.623	1.135	0.516	0.811	0.6	0.807	0.609	0.85	0.782	0.928	0.865	1.276	0.81	1.412	0.728	1.576	0.852	1.557	0.771	0.843	0.789	0.85	1.056	0.879	0.735	0.93	0.664	1.107	0.995	0.755	0.749	1.221	1.073	1.353	1.166	1.195
612	386.3196997	381.1468355	383.1537695	147.0885155	2.006934007	10278.91835	1	1	0.625	0.762	0.73	0.694	0.758	0.719	0.649	0.632	0.59	0.572	0.67	1.074	0.603	0.608	0.755	0.716	0.676	0.686	0.741	0.818	0.969	0.872	0.911	0.786	0.664	0.792	0.867	0.883	0.602	0.653	0.841	0.544	0.514	0.577	0.541	0.568	0.658	0.673	0.892	0.911	0.815
613	386.5010833	317.1315915	319.138195	83.07327145	2.00660356	6273.714286	1	1	0.932	0.879	1.072	0.941	0.981	0.856	0.948	0.864	0.917	0.865	1.027	0.849	1.054	0.872	0.988	0.935	0.912	0.822	1.108	0.91	1.005	0.937	0.982	0.89	0.96	0.869	0.987	0.85	0.942	0.88	0.875	0.831	0.87	0.861	0.918	0.931	0.851	0.853	0.888	0.867	0.909
615	387.1684566	351.1008073	353.1088351	117.0424873	2.008027732	7873.202312	1	1	0.889	0.825	0.987	0.87	1.6	1.125	0.884	0.573	1.54	1.124	1.007	0.805	1.19	0.783	0.929	0.757	1.385	1.204	1.096	0.861	1.313	1.449	1.394	1.137	1.355	1.337	0.866	1.031	0.727	0.663	0.942	0.798	0.891	0.866	0.909	1.19	1.141	1.075	1.551	1.46	1.049
616	387.2280769	700.2280855	702.2341471	466.1697655	2.006061537	2634	1	1	0.21	0.21	0.21	0.21	0.21	0.517	0.21	0.21	0.21	0.21	0.21	0.21	0.21	0.21	0.21	0.21	0.729	0.21	0.558	0.21	0.21	0.21	0.21	0.21	0.565	0.692	0.319	0.21	0.21	0.21	0.21	0.21	0.21	0.21	0.21	0.21	0.688	0.861	0.91	1.012	0.855
617	387.371	537.2012221	539.2079827	303.1429021	2.006760578	2683.5	1	1	1.173	1.631	0.596	0.352	0.596	0.326	0.741	0.743	0.461	0.671	0.558	0.601	0.572	0.703	0.617	0.628	1.062	0.427	0.448	0.467	0.746	0.659341617	0.561	0.516	0.665	0.904	0.588	0.68	0.635	0.692	0.851	0.661	0.529	0.577	0.495	0.355	0.497	0.443	0.614	0.611	0.752
618	388.4776565	364.1685056	366.1749843	130.1101856	2.006478712	7062.366412	1	1	0.627	0.569	0.906	0.979	0.591	0.577	0.743	0.723	0.663	0.57	0.732	0.485	0.793	0.809	0.708	0.788	0.631	0.881	0.621	0.672	1.008	0.953	0.783	0.744	1.07	1.144	1.027	1.135	0.535	0.614	0.674	0.534	0.627	0.735	0.733	0.657	0.692	0.641	0.657	0.59	0.398
621	389.0868	634.1034942	636.1093991	400.0451742	2.005904857	2992	1	1	0.218	0.443	0.223	0.352	0.239	0.255	0.289	0.311	0.224	0.374	0.24	0.22	0.318	0.392	0.214	0.267	0.371	0.409	0.255	0.435	0.397	0.637	0.499	0.492	0.268	0.442	0.236	0.274	0.707	0.735	0.295	0.161	0.264	0.19	0.12	0.208	0.12	0.12	0.35	0.275	0.207
622	389.788757	348.1371105	350.1437113	114.0787905	2.0066008	77077.40187	1	1	0.878	0.792	0.703	0.64	0.657	0.673	0.703	0.648	0.685	0.567	0.676	0.521	0.599	0.644	0.609	0.67	0.601	0.597	0.749	0.782	0.67	0.733	0.576	0.552	0.433	0.692	0.595	0.62	0.404	0.532	0.514	0.51	1.14	0.755	0.611	0.586	0.687	0.501	0.634	0.517	0.476
623	389.9756748	358.0410075	360.0474502	123.9826875	2.006442712	14007.05521	1	1	1.026	0.885	0.986	0.662	0.677	0.868	0.951	0.489	0.577	0.543	0.554	0.593	0.547	0.571	0.645	0.715	0.987	0.78	1.327	0.678	1.243	1.011	1.251	1.054	0.61	0.742	0.706	0.759	0.648	0.613	0.979	1.264	0.669	0.634	0.56	0.658	0.62	0.612	1.836	1.741	1.022
624	390.1322292	386.1505564	388.1571129	152.0922364	2.006556494	5056.041667	1	1	0.65	0.481	0.791	0.952	0.676	0.559	0.698	0.672	0.632	0.512	0.542	0.55443547	0.81	0.752	0.578	0.719	0.538	0.533	0.579	0.606	1.014	0.938	0.832	0.634	1.083	1.096	1.007	0.994	0.502	0.625	0.46	0.506	0.746	0.646	0.651	0.576	0.598	0.548	0.692	0.701	0.357
625	390.392	406.1427313	408.1489526	172.0844113	2.00622127	2522	1	1	4.176	2.615	3.935	1.804	3.764	1.839	3.417	2.856	3.961	2.483	2.686	2.522	4.862	2.498	4.245	2.599	3.927	4.628	2.927	2.916	4.947	7.378	5.203	4.038	5.674	3.099	4.627	3.699	4.309	3.593	3.127	2.198	3.485	4.137	4.352	4.354	3.548	2.965	3.553	3.544	4.521
627	391.6036103	348.1005575	350.1073025	114.0422375	2.006744989	72311.38967	1	1	1.083	0.901	0.67	0.502	1.068	0.845	1.059	0.835	1.109	0.699	0.94	0.817	0.859	0.963	0.908	0.727	1.21	0.872	0.941	0.717	0.851	0.719	0.842	0.568	0.943	1.485	0.726	1.005	0.672	0.615	1.102	1.347	0.864	0.949	0.859	0.777	1.389	1.399	1.061	1.217	0.794
628	392.0362308	315.1081647	317.1146818	162.0996893	2.006517188	17373.69231	2	2	0.517	0.549	0.539	0.681	0.349	0.469	0.383	0.536	0.27	0.444	0.371	0.383	0.404	0.297	0.383	0.465	0.575	0.482	0.28	0.394626375	0.391	0.482	0.27	0.538	0.423	0.779	0.27	0.53	0.375	0.485	0.483	0.18	0.492	0.413	0.452	0.514	0.566	0.596	0.756	1.28	0.54
629	392.2227625	396.1106659	398.1174999	162.0523459	2.006834031	43347.79357	1	1	0.613	0.578	0.591	0.492	0.629	0.537	0.661	0.425	0.612	0.493	0.592	0.464	0.71	0.69	0.658	0.55	0.658	0.632	0.66	0.619	0.915	0.756	1.019	0.869	0.729	0.786	0.65	0.704	2.374	2.3	0.658	0.924	0.52	0.552	0.534	0.657	0.579	0.572	0.741	0.803	0.559
631	393.4350642	306.6070144	308.6137096	145.0973888	2.006695157	32962.47706	2	2	0.451	0.581	0.563	0.665	0.409	0.461	0.43	0.52	0.24	0.393	0.351	0.382	0.334	0.338	0.304	0.473	0.634	0.488	0.297	0.462	0.272	0.392	0.325	0.57	0.333	0.7	0.306	0.525	0.359	0.51	0.455	0.184	0.496	0.516	0.483	0.454	0.671	0.602	0.8	0.681	0.511
632	393.6556212	492.1433002	494.1497059	258.0849802	2.006405729	2867.030303	1	1	0.657	0.738	0.942	1.078	0.961	0.614	0.842	0.852	1.076	0.651	0.927	1.229	1.417	0.905	0.858	0.677	0.762	0.795625359	0.801	0.84	1.539	0.921	1.617	1.345	1.342	1.266	1.016	1.11	1.063	1	1.041	1.657	0.996	1.102	1.149	0.716	0.726	0.646	0.595	0.659	0.634
633	393.7581818	629.2085731	633.221906	162.0992331	4.013332985	26033.81818	1	2	0.437	0.56	0.573	0.657	0.45	0.571	0.422	0.516	0.45	0.409	0.45	0.376	0.45	0.383	0.45	0.482	0.563	0.497	0.45	0.45	0.45	0.379	0.45	0.557	0.45	0.841	0.45	0.535	0.45	0.542	0.457	0.205	0.482	0.562	0.508	0.482	0.668	0.655	0.818	0.45	0.536
634	394.1602186	362.1163879	364.1230254	128.0580679	2.0066375	5637803.06	1	1	0.999	1.168	0.928	0.93	0.982	0.874	1.039	0.848	0.894	0.773	0.831	0.769	0.911	0.996	1.159	1.142	1.12	1.171	1.121	1.148	1.176	1.082	1.091	1.038	0.94	1.103	0.638	0.749	0.67	0.64	0.973	1.105	1.063	0.98	0.964	0.984	1.085	1.109	1.564	1.512	0.877
635	394.5395	447.0710692	449.0766494	213.0127492	2.005580245	2539	1	1	0.534	0.911	1.125	1.165	1.187	1.098	0.765	0.922	1.156	0.696	1.253	0.674	0.806	0.854	1.215	1.32	1.167	1.2	1.148	1.283	0.743	0.965	0.817	1.177	1.017	1.118	1.203	0.961	1.393	1.519	0.802	0.349	1.508	1.405	1.271	1.597	0.778	0.75	1.613	1.535	1.463
636	395.26675	323.1054878	325.1121376	89.04716776	2.00664985	910430.25	1	1	0.761	0.916	0.587	0.468	0.601	0.529	0.508	0.361	0.695	0.65	0.738	0.886	0.724	0.611	0.757	0.843	0.69	0.731	0.615	0.635	0.542	0.428	0.71	0.712	0.64	0.581	0.58	0.54	0.694	0.787	0.552	0.371	0.573	0.589	0.533	0.773	0.524	0.479	0.447	0.428	0.583
637	395.5485767	456.1318592	458.1383378	222.0735392	2.006478601	132589.3302	1	1	0.569	0.545	0.571	0.487	0.607	0.55	0.578	0.415	0.617	0.484	0.573	0.456	0.681	0.687	0.655	0.609	0.678	0.668	0.655	0.63	0.943	0.798	0.984	0.798	0.739	0.768	0.646	0.72	2.468	2.385	0.712	0.857	0.491	0.49	0.539	0.653	0.598	0.609	0.796	0.808	0.565
638	396.1640186	480.1794723	482.1860062	246.1211523	2.006533911	74279.46047	1	1	1.121	1.197	0.98	0.874	0.558	0.539	0.366	0.338	0.909	0.903	0.868	0.827	0.709	0.804	0.909	0.867	0.572	0.52	0.697	0.803	0.685	0.693	0.848	0.776	0.601	0.768	0.367	0.392	0.719	0.758	0.486	0.343	0.512	0.523	0.48	0.827	0.605	0.607	0.469	0.462	0.575
640	396.8841905	450.168975	452.175548	216.110655	2.006572972	32457.06667	1	1	0.549	0.603	0.731	0.655	0.743	0.61	0.725	0.669	0.908	0.952	1.026	0.954	0.794	0.859	0.713	0.595	0.794	0.406	0.795	0.784	0.513	0.476	0.427	0.335	0.597	0.748	0.366	0.419	0.482	0.478	0.394	0.523	1.823	1.829	1.732	0.624	0.524	0.582	0.549	0.585	0.576
641	397.6970379	437.0943847	439.1005657	203.0360647	2.006181088	18097.37441	1	1	0.794	1.098	1.205	1.61	0.95	0.996	0.634	0.777	0.749	0.74	1.003	0.901	1.241	1.373	1.272	1.602	0.989	1.214	0.996	1.594	1.328	1.698	1.701	1.981	1.069	1.223	1.149	0.935	0.959	1.059	0.734	1.668	0.733	0.723	0.877	1.182	0.994	1.036	1.158	1.252	1.3
642	398.2201667	570.2008144	572.2074957	336.1424944	2.006681308	4055.833333	1	1	0.657	0.767	0.958	0.891	0.497	0.506	0.756	0.618	0.848462513	0.19	0.245	0.19	0.956	1	1.419	0.19	0.494	0.897	0.577	0.455	1.15	1.227	0.476	0.358	0.484	0.451	0.19	0.19	0.651	0.659	0.19	0.19	3.03	3.162	2.285	0.409	0.19	0.828	0.637	0.603	0.717
643	398.2906417	420.1219153	422.1284523	186.0635953	2.006536991	15998.23529	1	1	0.658	0.514	0.418	0.389	0.728	0.73	0.716	0.63	0.9	0.875	0.516	0.537	0.646	0.608	0.242	0.218	0.504	0.327	0.56	0.518	0.1001	0.1001	0.272	0.191	0.726	0.8	0.535	0.639	0.387	0.356	0.457	1.137	0.399	0.399	0.493	0.521	1.096	1.05	0.782	0.754	0.309
648	400.3915926	408.1585357	410.165229	174.1002157	2.006693247	6527.333333	1	1	0.754	1.098	0.837	0.945	0.799	0.695	0.797	0.431	0.671	0.575	0.882	0.67	1.075	1.083	0.882	0.683	0.91	0.768	0.868	0.977	2.473	2.159672396	1.351	1.17	0.774	0.789	0.52	0.694	0.708	0.704	0.9	0.773	0.768	0.758	0.826	0.629	0.798	0.655	1.102	1.125	0.933
649	400.7345471	347.1163475	349.1231983	113.0580275	2.006850777	25337.95294	1	1	1.146	1.032	0.97	0.996	0.983	0.935	0.913	1.084	0.973	0.885	0.985	0.924	0.951	1.019	1.385	1.249	1.266	1.462	0.973	0.848	1.076	1.116	1.183	1.274	1.174	1.532	1.133	1.149	1.445	1.437	0.984	1.584	0.955	0.795	0.981	1.002	1.012	0.912	1.17	1.091	0.942
650	400.8916923	408.121906	410.1285829	174.063586	2.006676871	162637.4396	1	1	0.671	0.248	0.479	0.157	0.191	0.213	0.228	0.221	0.191	0.246	0.183	0.192	0.181	0.25	0.186	0.217	0.181	0.228	0.196	0.23	0.241	0.251	0.267	0.249	0.157	0.212	0.126	0.119	0.128	0.139	0.222	0.434	0.233	0.301	0.236	0.261	0.26	0.422	0.384	0.423	0.212
651	401.2266429	456.0716334	458.0778342	222.0133134	2.006200811	7960.571429	1	1	0.604	0.715	0.617	0.636	0.843	0.799	0.581	0.673	0.742	0.697	0.701	0.586	0.616	0.631	0.812	0.826	0.729	0.899	0.853	0.921	0.57	0.626	0.52	0.527	0.717	0.865	0.777	0.875	1.023	1.126	0.806	0.831	0.901	0.918	0.801	0.797	0.55	0.575	0.688	0.631	0.613
653	401.9060964	465.1797668	467.186408	231.1214468	2.006641209	42219.22843	1	1	0.131	0.133	0.479	0.449	0.257	0.24	1.319	1.253	0.197	0.186	0.153	0.14	0.172	0.156	0.1	0.1	0.369	0.151	0.169	0.182	1.318085887	0.1001	0.1	0.1	0.26	0.284	0.191	0.197	0.666	0.694	0.175	0.112	0.495	0.483	0.405	0.319	0.574	0.553	0.302	0.272	0.107
657	402.6725905	512.1514893	514.1578398	278.0931693	2.006350504	26205.87619	1	1	1.17	1.3	1.27	1.261	0.522	0.491	0.486	0.494	0.914	0.891	0.838	0.808	0.783	0.764	1.059	1.061	0.743	0.64	0.793	0.772	0.741	0.748	0.673	0.675	0.713	0.869	0.455	0.441	0.457	0.474	0.53	0.302	0.606	0.621	0.573	1.014	0.778	0.742	0.798	0.751	0.627
658	402.6808824	595.0503539	597.0562807	360.9920339	2.005926816	3894.705882	1	1	0.903	0.72	0.585	0.694	1.024	0.74	1.128	0.625	0.46	0.547	0.694	0.606	0.876	0.52	0.795	0.825	1.114	0.71	1.227	0.44	1.213	0.892	1.32	0.771	0.722	0.685	0.96	0.89	0.725	0.674	1.064	0.641	1.194	1.08	0.689	0.702	1.317	1.027	1.291	1.292	1.092
659	404.2300294	391.1798943	393.1863239	157.1215743	2.006429569	13397.41176	1	1	1.156	0.527	0.89	0.36	0.458	0.422	0.858	1.114	0.522	0.469	3.895	1.959	0.42	0.24	1.717	1.46	0.523	1.012	0.47	0.416	0.829	0.604	0.403	0.537	0.568	0.655	0.388	0.903	0.217	0.24	0.471	0.191	0.548	0.458	0.71	0.598	1.527	1.644	0.352	0.314	0.418
662	404.5620115	358.1213887	360.1279898	124.0630687	2.00660111	7926.425287	1	1	1.116	0.823	0.71	0.593	0.678	0.796	0.455	0.475	0.653	0.903	0.974	0.93	0.657	0.579	0.885	1.06	0.804	1.187	0.841	0.954	0.932	1.022	0.859	0.764	0.61	0.855	0.532	0.648	0.532	0.598	0.67	2.334	0.643	0.618	0.625	0.527	0.885	0.692	0.743	0.728	0.526
665	405.1094	366.0639721	368.0705553	132.0056521	2.00658318	4793.333333	1	1	0.403	0.416	0.407	0.373	0.391	0.471	0.649	0.644	0.84	0.504	0.56	0.808	0.574	0.737	0.518	0.672	0.479	0.951	0.827	0.803	0.741	0.555	0.425	0.388	0.683	0.905	0.571	1.081	0.909	0.849	1.138	0.929	0.403	0.425	0.393	0.489	0.887	0.659	1.291	1.182	1.281
666	405.112	431.1721875	433.178119	197.1138675	2.005931506	2470	1	1	1.075	0.56	0.986	0.56	0.746	0.56	0.914	1.878037199	0.481	0.56	2.954	0.78	0.728	0.56	1.036	0.56	0.775	0.56	0.893	0.56	1.878037199	1.878037199	0.56	1.878037199	0.844	0.56	0.56	0.66	0.56	1.878037199	0.56	0.56	0.488	0.56	0.56	0.56	1.076	1.708	0.527	9.99	0.488
671	405.7070333	445.0552379	447.0643919	210.9969179	2.009154003	4499.666667	1	1	0.582	1.05	0.673	0.823	0.747	0.579	0.491	0.792	0.923	0.863135239	0.623	0.615	0.68	0.818	0.766	1.051	1.115	0.994	0.71	1.207	0.433	0.633	0.54	0.848	0.728	0.975	0.679	0.676	0.533	0.836	0.537	0.865	0.61	0.688	0.703	1.185	0.789	0.727	0.829	0.796	0.983
674	406.0977352	317.1311967	319.1382502	83.07287667	2.007053499	6410.156028	1	1	0.983	0.894	1.098	1.083	0.939	0.941	0.91	0.866	0.906	0.918	1.019	0.918	1.023	0.88	0.926	0.896	0.921	0.882	1.023	0.927	0.962	0.937	0.957	0.984	0.935	0.881	0.949	0.875	0.902	0.825	0.855	0.8	0.868	0.852	0.867	0.902	0.813	0.81	0.898	0.853	0.89
675	406.1905556	561.189954	563.1963165	327.131634	2.006362523	2580.666667	1	1	0.753	0.584	0.484	0.578	0.851	0.555	0.493	0.424	0.422	0.664	0.834	0.854	1.016	0.637	0.745	0.219	0.459	0.413	0.619	0.511	0.516	0.448	0.587	0.479	0.993	0.584	0.992	0.837	2.057	1.755	0.643	0.971	0.44	0.422	0.762	0.999	0.625	0.43	0.502	0.436	0.18
676	406.4651667	437.1459499	439.1530356	203.0876299	2.007085671	12615.66667	1	1	0.658	0.351	0.464	0.164	0.162	0.184541615	0.297	0.19	0.151	0.241	0.225	0.231049776	0.225233113	0.19	0.174	0.326	0.3	0.19	0.229	0.19	0.249	0.352778804	0.248	0.19	0.176518329	0.19	0.156	0.19	0.592884846	0.3747119	0.216	0.333	0.344	0.384120671	0.183	0.141	0.331	0.19	0.324	0.934960079	0.282
677	406.8484	309.1264104	311.1331499	75.06809044	2.00673947	10506.6	1	1	0.549	0.505	0.616	0.734	0.519	0.494	0.543	0.563	0.683	0.645	0.754	0.511	0.553	0.558	0.457	0.448	0.564	0.472	0.804	0.848	0.6	0.572	1.076	0.989	1.972	2.535	0.538	0.712	0.453	0.529	0.659	0.631	0.81	0.801	0.527	0.73	0.687	0.629	0.708	0.606	0.604
681	407.861337	479.1952495	481.2018141	245.1369295	2.006564619	6774.956522	1	1	0.82	1.052	0.875	0.97	0.521	0.52	0.761	0.7	0.452	0.243	0.437	0.2	1.245	1.21	0.215	0.197	0.403	0.24	0.495	0.39	0.426	0.265	0.246	0.232	0.355	0.526	0.187	0.151	0.674	0.642	0.892	0.66	4.418	4.104	2.208	0.431	0.396	0.334	0.59	0.672	0.835
682	408.1757097	459.1198154	461.126181	225.0614954	2.006365599	6851.870968	1	1	0.661	0.898	0.633	0.5	0.571	0.605	0.619	0.449	0.6	0.68	0.628	0.645	0.839	0.696	0.645	0.63	0.716	0.809	0.752	0.867	1.105	1.014	1.032	0.871	0.817	0.877	0.783	0.825	2.335	2.252	0.716	0.773	0.572	0.627	0.547	0.742	0.63	0.61	0.795	0.815	0.65
683	408.2431875	374.0801043	376.0881574	140.0217843	2.008053091	4600	1	1	0.917	0.49	1.239	0.901877709	0.49	0.901877709	4.16	0.901877709	0.901877709	0.901877709	0.49	0.49	0.49	3.47	0.725684883	0.49	0.49	1.49	0.84	4.54	0.843987753	0.49	1.18	0.901877709	0.84	1.24	0.901877709	0.901877709	0.49	0.901877709	0.87	0.49	0.883	0.901877709	0.901877709	0.901877709	0.864	0.901877709	1.421	0.901877709	1.238
686	408.3210084	362.116398	364.1229086	128.058078	2.006510536	22668.58824	1	1	1.008	1.047	0.924	0.881	0.962	0.866	1.06	0.877	0.913	0.815	0.823	0.765	0.885	1.003	1.129	1.031	1.132	1.088	1.116	0.892	1.109	1.114	1.12	1.044	0.956	1.039	0.654	0.734	0.647	0.64	0.947	1.088	1.017	0.972	0.963	0.967	1.098	1.101	1.564	1.455	0.862
687	408.3712364	437.1380809	439.1476322	203.0797609	2.009551288	9139.418182	1	1	0.725181336	0.707	0.629	0.587	0.736	0.481	0.562	0.468	0.525	0.515	0.61	0.483	0.747	0.693	0.727	0.518	0.684	0.682	0.705	0.594	0.888	0.741	0.974	0.885	0.731	0.695	0.699	0.714	1.996	2.232	0.738	0.955	0.482	0.498	0.476	0.696	0.698	0.523	0.699	0.71	0.682
688	408.38775	571.185239	573.1911222	337.126919	2.005883221	3550.833333	1	1	0.765	0.838	1.129	1.23	0.944	0.824	0.897	1.034	0.405	0.298	0.570169983	0.363	1.259	1.126	0.617674502	0.296	0.425	0.566	0.539	0.472	0.797	0.718	0.255	0.41	0.641	0.575	0.413	0.446	0.591	0.656	0.533	0.62605896	2.279	2.243	1.777	0.291	0.422351019	0.353061489	0.348	0.247	0.203
689	408.4986081	379.1317203	381.1381972	145.0734003	2.006476901	16358.81081	1	1	0.109	0.135	0.433	0.434	0.1	0.1	0.14	0.1	0.656	0.626	0.121	0.115	0.202	0.156	0.121	0.1	0.564	0.656	0.476	0.517	0.158	0.17	0.477	0.413	0.511	0.505	0.121	0.103	0.1	0.1	0.178	0.11	0.1	0.1	0.1	0.202	0.196	0.125	0.12	0.106	0.202
690	408.5738435	493.2106856	495.2174256	259.1523656	2.006740056	11023.03401	1	1	0.862	1.161	1.224	1.193	0.699	0.621	1.013	0.847	0.37	0.287	0.598	0.513	1.156	1.189	0.362	0.387	0.517	0.402	0.603	0.555	0.951	0.746	0.532	0.585	0.6	0.756	0.263	0.291	0.938	0.721	0.376	0.264	3.323	3.239	1.894	0.557	0.331	0.617	0.629	0.64	0.758
691	408.6759286	366.100282	368.1074312	132.041962	2.007149177	8169.785714	1	1	0.443	0.958	0.926	0.752	1.171	0.943	0.72	0.744	0.569	0.777	0.823	1.05	0.876	0.925	1.359	0.998	2.378	0.656	1.046	1.345	0.841	0.963	1.089	0.768	0.775	1.125	1.459	1.57	0.971	0.996	1.073	1.049	0.791	1.114	1.021	0.903	2.656	3.104	5.856	5.201	2.614
693	413.8331944	323.5374997	325.5456427	89.47917974	2.008142908	1312570.133	1	1	0.705	0.795	0.603	0.575	0.596	0.525	0.751	0.808	0.677	0.638	0.656	0.63	0.751	0.853	0.616	0.765	0.723	0.653	0.598	0.593	0.617	0.721	0.663	0.604	0.652	0.701	0.788	0.874	0.683	0.75	0.593	0.322	0.674	0.676	0.592	0.774	0.45	0.433	0.525	0.538	0.621
694	414.2146667	323.2796783	325.2878669	89.22135834	2.008188545	443414.6667	1	1	0.835	0.917	0.73	0.749	0.75	0.672	0.868	0.744	0.817	0.74	0.795	0.736	0.874	0.835	0.797	0.749	0.832	0.733	0.751	0.744	0.752	0.724	0.802	0.751	0.784	0.846	0.883	0.927	0.772	0.876	0.733	0.489	0.745	0.822	0.782	0.878	0.571	0.596	0.669	0.689	0.759
696	415.4764716	323.1058179	325.1126908	89.04749788	2.00687294	16430015.39	1	1	0.799	0.748	0.589	0.566	0.595	0.49	0.689	0.77	0.76	0.6	0.775	0.61	0.807	0.87	0.744	0.73	0.742	0.7	0.61	0.72	0.706	0.55	0.74	0.579	0.725	0.69	0.767	0.85	0.706	0.827	0.562	0.372	0.65	0.741	0.603	0.83	0.563	0.592	0.643	0.471	0.599
698	417.7252744	424.1532297	426.1597348	190.0949097	2.00650515	11348.47314	1	1	0.1	0.136	0.1	0.1	0.1	0.201	0.488	0.216	0.435	0.1	0.1001	0.1001	0.1	0.123	0.1	0.212	0.134	0.128	0.644	0.391	0.115	0.1	0.1	0.1	0.1001	0.141	0.1	0.1	0.1	0.1	0.462	0.387	0.1	0.1	0.1001	9.99	0.106	0.106	0.132	0.115	0.1
699	418.2343542	396.1109245	398.1173829	162.0526045	2.006458387	97559.33333	1	1	0.589	0.514	0.559	0.447	0.614	0.466	0.618	0.39	0.591	0.469	0.572	0.427	0.696	0.646	0.617	0.539	0.641	0.616	0.645	0.614	0.905	0.783	0.975	0.824	0.728	0.754	0.629	0.66	2.353	2.265	0.654	0.896	0.522	0.534	0.53	0.622	0.575	0.561	0.744	0.795	0.559
700	419.8440093	478.1273653	480.1338656	244.0690453	2.006500274	216216.7721	1	1	0.369	0.373	0.583	0.589	0.916	0.788	0.723	0.585	0.642	0.636	0.843	0.701	0.756	0.634	1.097	0.912	0.552	0.621	0.999	1.059	0.816	0.751	0.764	0.672	0.919	0.855	1.248	1.365	0.75	0.759	0.935	0.842	0.811	0.822	0.833	0.739	0.635	0.642	0.719	0.679	0.833
702	420.514875	399.1457882	401.1524448	165.0874682	2.006656622	48531.7	1	1	1.522	0.776	1.513	0.63	0.789	0.326	0.405	0.312	0.485	0.395	0.845	0.529	0.851	0.521	0.55	0.515	0.892	0.508	0.368	0.374	0.587	0.406	0.487	0.258	0.711	0.598	0.584	0.549	0.408	0.36	0.719	0.417	0.818	0.789	0.459	0.57	0.443	0.485	0.888	0.834	0.616
704	421.0612463	477.1613503	479.1680311	486.2060607	2.006680749	18677.23881	2	2	0.555	0.648	0.561	0.446	0.615	0.729	0.482	0.529	0.647	0.525	0.46	0.433	0.504	0.733	0.557	0.626	0.556	0.619	0.641	0.659	0.847	0.914	0.556	0.686	0.644	0.969	0.661	0.831	0.577	0.616	0.645	0.372	0.771	0.645	0.555	0.445	0.697	0.601	0.592	0.595	0.581
705	421.106307	317.1313557	319.1379934	83.07303566	2.006637736	62138.04651	1	1	1.03	0.698	1.181	0.668	0.871	0.452	0.777	0.377	0.891	0.456	1.003	0.583	1.016	0.568	0.921	0.503	0.921	0.531	0.934	0.437	0.935	0.467	0.924	0.469	0.892	0.693	0.853	0.729	0.808	0.743	0.857	0.744	0.838	0.847	0.815	0.871	0.783	0.787	0.871	0.847	0.884
706	421.2537097	446.1739081	448.1804592	212.1155881	2.006551088	12874.45161	1	1	0.654	0.796	1.835	1.618	0.715	0.761	0.952	0.784	0.8	0.549	0.626	0.593	0.548	0.641	0.923	0.901	0.909	0.824	0.954	0.929	0.652	0.637	0.546	0.612	0.796	0.937	0.589	0.649	0.69	0.704	0.719	0.899	0.727	0.664	0.663	0.987	0.591	0.594	1.033	1.105	0.65
707	421.8240791	337.1211423	339.1277222	103.0628223	2.006579889	37849.07907	1	1	0.594	0.657	0.62	0.641	0.756	0.673	0.727	0.713	0.696	0.7	0.594	0.635	0.693	0.736	0.791	0.748	0.746	0.764	0.63	0.735	0.801	0.847	0.767	0.69	0.805	0.879	0.752	0.871	0.663	0.714	0.771	0.75	0.671	0.678	0.667	0.58	0.482	0.519	0.672	0.699	0.475
708	422.1812432	402.086095	404.0926	168.027775	2.006505041	482919.4595	1	1	0.908	0.943	1.42	1.306	0.806	0.609	0.671	0.546	0.727	0.689	1.085	0.87	0.537	0.393	1.354	0.991	1.001	1.121	1.247	1.21297153	1.012	0.929	0.648	0.512	1.041	0.913	1.214	1.208	1.092	1.053	0.461	0.53	0.603	0.616	0.633	1.151	0.871	0.864610857	0.84	0.829	1.347
710	423.4511349	406.1426244	408.1492041	172.0843044	2.006579721	73908.8186	1	1	0.787	0.682	0.657	0.431	0.713	0.58	0.691	0.584	0.66	0.597	0.768	0.716	0.847	0.775	0.529	0.478	0.622	0.499	0.705	0.71	0.646	0.506	0.659	0.626	0.41	0.453	0.473	0.537	0.638	0.625	0.593	0.412	1.401	1.466	1.311	0.61	0.515	0.506	0.49	0.497	0.36
711	423.6796267	504.1807513	506.185694	270.1224313	2.004942706	3210.72	1	1	3.073	1.369	2.41	1.393	2.094	1.326	1.591	0.939	2.255	1.086	1.755	1.191	1.941	0.989	2.11	0.801	2.433	0.974	2.372	1.139	1.661	1.096	1.835	1.025	1.464	1.147	1.505	1.064	1.304	1.289	1.474	1.323	2.295	0.821	1.511	1.666	2.405	0.895	2.501	0.77	2.357
713	423.7645	477.1620163	479.1686909	243.1036963	2.006674639	6197	1	1	0.555	0.643	0.561	0.455	0.615	0.786	0.482	0.598	0.647	0.51	0.46	0.385	0.504	0.769	0.557	0.647	0.583	0.466	0.641	0.521	0.847	0.906	0.556	0.788	0.644	0.937	0.661	0.831	0.611	0.616	0.645	0.359	0.771	0.645	0.555	0.445	0.697	0.601	0.592	0.595	0.581
714	423.775	486.1684728	488.1762608	252.1101528	2.007788032	2272	1	1	0.373	0.657	0.813	0.745	0.506	0.723	0.754	0.454	0.535	0.768	0.507	0.585	0.461	0.782184818	0.397	0.631	0.918	0.789	0.579	1.322	0.69	0.93	0.537	0.575887817	0.765	0.587	0.351	0.736	0.608	0.637	0.363	0.283	0.497	0.477	0.454	0.708	0.846	1.01	0.962	1.262	0.662
715	424.0167426	527.2049411	529.2113722	293.1466211	2.006431025	5424.516961	1	1	0.799	0.607	0.81	0.793	0.838	0.365	0.406	0.274	0.33	0.679	1.262	0.832	1.245	0.599	1.036	0.53	0.528	0.408	0.519	0.611	0.678	0.487	0.862	0.476	1.007	0.471	1.258	0.76	2.53	2.189	0.542	0.923	0.515	0.522	1.058	1.103	0.499	0.411	0.491	0.456	0.389
719	424.845	477.6635551	479.6691559	487.2104701	2.005600824	4518	2	2	0.629	0.601	0.655	0.513	0.698	0.763	0.556	0.509	0.697	0.513	0.439	0.431	0.547	0.782	0.626	0.566	0.686	0.677	0.583	0.741	0.752	0.984	0.7	0.709	0.661	1.101	0.754	0.691	0.708	0.694	0.735	0.37	0.784	0.794	0.647	0.483	0.7	0.683	0.773	0.69	0.743
720	425.0712931	368.1156187	370.1222355	134.0572987	2.006616854	12412.24138	1	1	0.466	0.556	0.445	0.479	0.54	0.518	0.428	0.465	0.507	0.454	0.548	0.432	0.644	0.786	0.537	0.73	0.562	0.872	0.603	0.775	0.928	0.914	0.876	0.909	0.777	0.864	0.604	0.79	1.922	2.011	0.613	0.507	0.508	0.509	0.482	0.547	0.625	0.709	0.918	0.901	0.554
721	425.62336	502.1750556	504.1818198	268.1167356	2.006764193	5068.4	1	1	0.768	0.758	0.758	0.635	0.295	0.260771147	0.225	0.21	0.234	0.274274518	0.598	0.646	0.36	0.349694443	0.705	0.481546914	0.621	0.364	0.53	0.21	0.329	0.21	0.276	0.21	0.276	0.21	0.266	0.298377928	0.408	0.282	0.452	0.27	0.335	0.21	0.27	0.358	0.618	0.21	0.75	0.575	0.815
725	426.9445	460.1700739	462.1726885	226.1117539	2.002614602	3935.75	1	1	0.189	0.12	0.12	0.487441303	0.147	0.126	0.285	0.28598022	0.12	0.634419586	0.168	1.027135516	0.1	0.564367101	0.12	0.521420387	0.829	1.266084886	0.12	1.198343064	0.12	0.740135599	0.12	0.542955334	0.12	1.649275311	0.12	0.12	0.218	0.332	0.314	0.269653463	0.12	0.291	0.133	0.12	0.692	1.888	1.104	3.19	1.099
726	428.2593874	362.1162276	364.1228253	128.0579076	2.0065977	4271.833992	1	1	1.003	1.134	0.937	0.89	1.027	0.884	0.995	0.857	0.932	0.822	0.89	0.834	0.916	0.853	1.144	1.184	1.088	1.135	1.156	1.121	1.176	0.947	1.107	0.968	0.998	1.086	0.679	0.759	0.666	0.676	1.049	1.116	1.043	1.012	1.002	1.029	1.143	1.093	1.513	1.434	0.879
727	428.4295	309.0359259	311.0424021	74.97760591	2.006476239	5045	1	1	0.394	0.332	0.581	0.368	0.36	0.358	0.903	1.045	0.535	0.747	0.743	0.841	0.52	0.348	0.72	0.678	0.535	1.493	0.914	1.064	0.591	0.891	0.536	0.485	0.71	0.765	0.973	0.902	0.65	0.597	0.625	0.948	0.528	0.361	0.388	0.329	0.57	0.422	1.007	1.044	0.715
729	428.9455	564.117363	566.1239133	330.059043	2.006550345	2043	1	1	0.41	0.41	0.641	0.41	0.693	0.573	0.41	0.368381542	0.319	0.41	0.41	0.41	0.43	0.434	0.593	0.569359104	0.694	1.152042134	0.713	0.513	0.65	0.503361655	0.483	0.625326654	0.41	0.41	0.8	0.674	0.41	0.41	0.41	0.41	0.598	0.283	0.41	0.41	0.426	0.398	0.468	0.62	0.753
731	429.217	284.1761039	286.1826976	50.11778386	2.006593789	3724	1	1	1.267	1.31	1.257	0.834	0.871	0.884	0.787	1.157	0.692	0.987	0.912	1.375	1.135	1.046	0.774	1.093	0.729	0.946	0.895	1.307	0.609	1.059	0.674	0.809	0.474	0.853	0.472	0.825	0.56	0.976	0.597	1.029	2.154	2.542	1.194	0.649	1.424	1.055	0.942	0.781	0.786
732	429.4638129	427.1350404	429.1413964	193.0767204	2.006355976	7507.597122	1	1	0.381	0.43	0.292	0.222	0.745	0.651	0.217	0.172	0.861	0.634	0.733	0.717	0.967	0.876	0.696	0.642	0.124	0.7	1.066	0.976	0.1001	0.1001	0.211	0.195	1.001	1.218	1.22	1.271	0.516	0.551	0.889	0.464	0.831	0.901	0.876	0.767	0.164	0.138	0.1	0.104	0.1
733	429.57287	303.1157433	305.1222603	69.05742331	2.006516962	6447.46	1	1	1.008	0.981	1.015	0.825	0.812	0.864	0.752	0.957	0.859	1.034	0.962	1.048	0.851	0.901	0.75	0.913	0.768	0.792	0.755	1.218	0.725	1.062	0.698	0.807	0.615	0.79	0.701	0.831	0.644	0.798	0.735	0.882	1.339	1.185	0.976	0.829	0.96	0.852	0.803	0.741	0.828
734	429.5821581	348.13706	350.1436182	114.07874	2.006558172	229139.9628	1	1	1.177	1.121	1.097	0.981	0.602	0.891	0.665	0.962	0.656	1.036	0.868	1.285	0.728	1.14	0.548	0.95	0.704	0.916	0.722	1.306	0.627	1.07	0.495	0.708	0.409	0.82	0.389	0.827	0.457	0.902	0.445	1.029	2.113	1.973	1.12	0.547	0.995	0.992	0.917	0.855	0.785
735	429.9009375	456.1319679	458.13824	222.0736479	2.006272031	3583.25	1	1	0.688	0.605	0.593	0.54	0.659	0.586	0.644	0.564	0.657	0.491	0.609	0.523	0.721	0.692	0.791	0.778	0.695	0.796	0.856	0.699	1.034	1.056	0.957	0.858	0.784	0.816	0.699	0.748	2.166	2.11	0.741	0.957	0.573	0.648	0.642	0.65	0.598	0.671	0.842	0.915	0.537
739	432.2343333	333.1013425	335.1077659	99.0430225	2.006423384	4039	1	1	0.901	1.137	1.154	1.122	0.806	0.59	0.522	0.523	0.31	0.794	0.929	0.731	0.978	0.85	0.849	1.08	0.987	1.106	0.617	0.715	0.929	0.761	0.914	1.051	0.863	0.964	0.829	0.845	1.138	0.97	0.798	1.857	0.75	0.787	0.749	1.182	0.794	0.772	1.145	1.151	0.538
740	432.678	708.1183274	712.1320986	241.0089874	4.0137712	4999.142857	1	2	0.68	0.82	0.707	0.747	0.636	0.623	0.651	0.64	0.73	0.632	0.59	0.642	0.728	0.748	0.719	0.764	1.027	0.892	0.817	0.897	0.827	0.764	0.788	0.725	0.911	0.964	0.87	0.849	0.794	0.814	0.662	0.464	0.566	0.596	0.615	0.798	0.634	0.672	0.773	0.752	0.802
742	434.2250952	380.0731267	382.0795002	146.0148067	2.006373438	5152.761905	1	1	0.523	0.349	0.65	0.393	0.324	0.356	0.709	0.183	0.344	0.392	0.211	0.191	0.335	0.187	0.452	0.343	0.684	0.361	1.295	0.290595427	0.703	0.344	0.593	0.4	0.368	0.283	0.408	0.309	0.675	0.282	0.772	0.23	0.252	0.241	0.339	0.343	0.242	0.258	1.296	1.327	0.849
743	434.6136223	351.1377061	353.1432806	117.0793861	2.005574532	14018.30851	1	1	0.94	1.091	1.483	1.454	1.457	1.276	1.246	1.112	1.16	1.39	0.949	1.21	1.124	1.142	1.183	1.176	1.058	1.204	1.141	1.101	1.275	1.346	1.028	1.243	1.45	1.451	1.092	1.266	1.292	1.243	0.987	1.381	1.137	1.247	1.05	1.215	0.746	0.764	1.281	1.113	1.017
744	435.2722442	707.1175324	711.1308678	240.0081924	4.013335404	13322.81589	1	2	0.595	0.779	0.642	0.706	0.644	0.576	0.615	0.552	0.668	0.56	0.566	0.587	0.71	0.749	0.669	0.763	0.932	0.859	0.725	0.826	0.757	0.773	0.692	0.633	0.849	0.856	0.788	0.807	0.793	0.687	0.662	0.428	0.532	0.518	0.592	0.702	0.622	0.63	0.672	0.691	0.769
746	436.2498442	295.1187645	297.1248332	61.06044449	2.006068689	12137.70159	1	1	3.707	3.373	3.561	3.449	3.789	3.459	3.931	3.659	3.767	3.705	3.535	3.5	3.464	3.849	3.815	3.676	3.586	3.608	3.549	3.485	3.682	3.431	3.757	3.695	3.75	3.658	3.797	3.809	3.667	3.69	3.534	3.897	3.59	3.466	3.803	3.698	3.653	3.488	3.558	3.688	3.432
747	436.9394419	396.110636	398.1172125	162.052316	2.006576497	1505330.353	1	1	0.556	0.476	0.562	0.351	0.615	0.463	0.574	0.336	0.598	0.407	0.572	0.348	0.701	0.607	0.621	0.479	0.649	0.526	0.659	0.513	0.902	0.624	0.963	0.764	0.732	0.739	0.634	0.664	2.419	2.29	0.66	0.834	0.53	0.527	0.531	0.615	0.586	0.575	0.759	0.818	0.577
748	437.271562	354.0608305	356.0674679	240.005021	2.006637438	9089.572584	2	2	0.649	0.755	0.659	0.696	0.561	0.603	0.586	0.556	0.654	0.599	0.574	0.587	0.725	0.688	0.652	0.701	0.938	0.79	0.696	0.795	0.753	0.708	0.73	0.628	0.814	0.878	0.743	0.793	0.784	0.681	0.608	0.403	0.532	0.549	0.615	0.701	0.586	0.6	0.634	0.708	0.777
752	438.930913	317.1314204	319.1380193	83.07310042	2.006598889	5454.629921	1	1	0.978	0.816	1.028	0.826	0.884	0.864	0.875	0.747	0.969	0.826	0.981	0.861	0.999	0.785	0.912	0.828	0.923	0.819	0.936	0.889	0.952	0.81	0.948	0.804	0.916	0.806	0.912	0.865	0.881	0.76	0.841	0.8	0.851	0.825	0.834	0.875	0.804	0.817	0.874	0.816	0.864
753	439.1064286	367.0956964	369.1023875	133.0373764	2.00669108	39108.28571	1	1	0.816	0.7	0.597	0.3	0.263	0.418	0.299	0.66435089	0.261	0.63887151	0.186	0.422565214	0.276	0.549919618	0.196	1.048	0.166	0.571202009	0.249	0.576	0.251	0.516221021	0.348	0.554	0.303	0.513	0.251	0.356	0.248	0.259	0.339	0.536	0.296	0.491	0.356	0.296	0.186	0.192166301	0.308	0.234808723	0.235
754	439.6983149	437.1376397	439.144103	203.0793197	2.006463246	9397.296011	1	1	0.677	0.747	0.667	0.628	0.703	0.639	0.652	0.544	0.612	0.632	0.638	0.574	0.851	0.684	0.738	0.725	0.693	0.738	0.748	0.725	1.14	0.979	1.114	1.05	0.921	0.881	0.784	0.909	2.465	2.392	0.752	0.925	0.607	0.609	0.602	0.773	0.674	0.648	0.876	0.863	0.652
755	439.9684785	709.1169163	713.1302726	242.0075763	4.013356306	2551.8444	1	2	0.7	0.833	0.747	0.751	0.724	0.639	0.706	0.668	0.689	0.666	0.66	0.697	0.772	0.809	0.738	0.866	0.975	0.947	0.785	0.833	0.813	0.899	0.75	0.732	0.909	1.001	0.892	0.879	0.877	0.738	0.72	0.482	0.677	0.645	0.654	0.812	0.648	0.66	0.788	0.807	0.82
756	440.0404444	335.1056611	337.1123497	101.0473411	2.006688554	5585.555556	1	1	1.219	1.191	0.476	0.385	0.412	0.401	0.382	0.323	0.467	0.422	0.715	0.642	0.44	0.474	0.448	0.333	0.77	0.766	1.467	1.157	0.293	0.254	0.675	0.627	0.903	1.072	0.155	1.28	0.234	0.234	2.594	2.343	0.306	0.376	0.292	0.473	1.189	1.279	0.296	0.412	0.695
757	440.2489211	402.086574	404.0930122	168.028254	2.006438153	9531.842105	1	1	0.965	0.951	1.435	1.357	0.808	0.61	0.69	0.553	0.733	0.359	1.068	0.873081988	0.55	0.501	1.34	1.063135653	1.019	1.487	1.22	1.202223821	1.025	0.991725545	0.644	0.614	1.046	0.745	1.213	1.11	1.094	1.047	0.47	0.544	0.609	0.616	0.669	1.144	0.894	1.104	0.86	0.829	1.36
759	441.179	376.1323089	378.1386576	142.0739889	2.006348692	3016	1	1	0.49	0.32	0.561	0.54	0.787	0.647	0.886	0.753	0.685	0.393	0.512	0.526	0.557	0.59	0.793	0.641	0.778	0.552	0.664	0.606	1.263	1.264899281	0.783	0.882	0.769	0.777	0.714	0.81	0.24	0.24	1.169	0.683	0.831	1.086	0.964	0.738	0.858	0.778	1.328	0.924	0.468
760	441.182	354.5645806	356.5713644	241.0125212	2.006783765	3720	2	2	0.688	0.878	0.719	0.857	0.699	0.611	0.676	0.631	0.705	0.644	0.606	0.492	0.761	0.836	0.721	0.778	1.006	1.036	0.856	0.694	0.887	0.715	0.763	0.624	0.92	0.955	0.861	0.882	0.888	0.773	0.686	0.475	0.582	0.572	0.601	0.782	0.653	0.661	0.725	0.742	0.807
761	441.973375	322.0734065	324.0798434	88.0150865	2.006436863	5972.5	1	1	0.277	0.272	0.442	0.252	0.666	0.644	0.421	0.511	1.112	0.996	0.483	0.446	0.697	0.763	0.921	0.64	0.236	0.527	0.864	0.782	0.873	0.781	0.89	0.737	1.04	0.925	0.932	0.642	0.676	0.654	0.561	0.279	0.706	0.553	0.441	0.781	0.303	0.287	0.704	0.637	0.332
762	441.9917	639.0142964	641.0195492	809.9119527	2.005252808	2990.8	2	2	0.671	5.584	0.897	3.239	2.014	3.718	0.772	2.706	1.802	2.005	2.901	2.468	0.651	2.285	1.735	4.11	3.219	2.506	1.004	2.704	0.832	3.826	1.759	4.88	1.354	3.69	2.354	2.306	0.664	4.178	0.722	3.138	4.849	6.231	0.912	2.468	2.111	2.267	1.72	1.659	1.391
767	443.24	392.1246237	394.1308863	158.0663037	2.006262612	7932	1	1	0.170719777	0.388	9.99	0.528	0.1001	0.301	0.108562757	0.685	0.990367232	1.012	0.1001	0.612	0.1001	0.518	0.1001	0.41	9.99	0.268	0.149241022	0.643	9.99	2.807	9.99	8.678	0.1001	1.009	0.1001	0.504	0.1001	0.1001	0.1001	0.881909255	0.1001	0.1	0.1001	0.950348169	2.970992144	0.607842704	0.1001	0.786163167	0.1001
768	443.296	603.1244452	605.1307499	369.0661252	2.006304658	3318	1	1	0.37	0.37	0.37	0.434	0.37	0.37	0.37	0.37	0.37	0.472	0.37	0.37	0.37	0.37	0.37	0.461	0.37	0.422	0.37	0.405474137	0.730872471	0.37	0.37	0.379	0.37	0.753	0.37	1.032	0.37	0.458	0.37	0.164	0.37	0.448	0.37	0.37	0.776	0.563	0.674	0.561	0.659
769	443.6207083	478.1407817	480.1471286	244.0824617	2.006346975	3537.416667	1	1	0.986	1.119	0.692	0.575	1.221	0.857	0.926	0.646	1.278	0.752	1.158	0.687	1.428	1	0.89	0.696	0.749	0.652	0.999	0.834	0.513	0.374	0.598	0.461	0.907	1.13	0.593	0.831	0.469	0.75	0.909	0.534	0.927	0.747	0.756	0.554	0.586	0.601	0.687	0.683	0.343
771	443.7175111	592.1476011	594.1539967	358.0892811	2.006395609	6881.125926	1	1	0.197	0.207	0.447	0.481	0.606	0.581	0.317	0.282	0.282	0.291	0.437	0.403	0.636	0.5	1.067	0.955	0.79	0.885	0.617	0.676	0.562	0.46	0.428	0.422	0.188	0.166	0.536	0.566	0.274	0.226	0.151	0.117	0.296	0.307	0.294	0.53	0.575	0.567	0.308	0.309	0.668
773	444.6305	308.0110994	310.0147686	73.95277939	2.003669248	8464	1	1	1.694	1.608	1.983	1.49	2.018	1.429	1.644	1.451	1.601	1.56	1.488	1.331	2.986	1.905	2.358	1.85	1.514	2.015	1.793	1.65	3.772	2.342	3.164	2.965	2.918	2.896	2.775	2.857	2.496	2.042	1.682	1.203	1.626	1.539	2.081	2.392	1.476	1.426	2.375	1.947	1.856
775	445.348	354.0632055	356.0703971	120.0048855	2.007191556	7650	1	1	0.651	0.65	0.651	0.755	0.61	0.613230607	0.577	0.589872127	0.647	0.611031901	0.58	0.57543836	0.731	0.723422926	0.713	0.686731147	0.935	0.777892516	0.732	0.8432185	0.735	0.726529568	0.717	0.701	0.819	0.865	0.782	0.807	0.756	0.714	0.635	0.414	0.518	0.555	0.582	0.732	0.594	0.596	0.66	0.677	0.779
777	445.9533333	535.1753955	537.1791325	301.1170755	2.003737014	2003.333333	1	1	0.754	0.996	1.1	1.601	0.939	1.986	0.744	1.011	0.904	1.341	0.876	2.142	0.866	1.364	0.92	2.302663662	1.124	2.311	1.026	1.773181353	1.141	1.621	1.085	1.438	0.88	1.643	0.894	1.643	2.085	1.839	0.838	1.044	0.645	1.079	0.855	0.9	0.799	1.038	1.34	1.903	0.946
778	446.300931	286.0295479	288.0341122	51.97122789	2.00456429	67405.86207	1	1	1.673	1.436	1.981	1.421	1.907	1.535	1.61	1.341	1.595	1.496	1.533	1.343	2.701	1.811	2.141	1.683	1.434	2.217	1.864	1.543	3.285	2.292227848	4.184	2.514	3.852	2.367	2.423	2.298	2.266	1.82	1.533	1.116	1.712	1.557	1.851	2.177	1.36	1.476	2.247	1.817	1.698
780	446.3538438	437.1377304	439.1441276	203.0794104	2.006397194	13212.375	1	1	0.676	0.63	0.664	0.562	0.698	0.637	0.652	0.513	0.61	0.627	0.626	0.528	0.831	0.706	0.744	0.736	0.692	0.802	0.751	0.741	1.133	0.914	1.11	1.054	0.913	0.899	0.788	0.901	2.457	2.387	0.76	0.942	0.609	0.609	0.602	0.771	0.673	0.648	0.872	0.876	0.662
783	447.1349669	453.1686107	455.1751364	219.1102907	2.006525701	7755.58011	1	1	0.532	0.606	0.819	0.806	0.86	0.668	0.574	0.466	0.533	0.495	0.686	0.548	0.823	0.692	1.029	0.845	0.562	0.915	0.867	0.915	0.979	0.992	0.741	0.564	0.9	0.847	1.773	2.006	0.912	0.9	0.632	0.587	0.571	0.606	0.747	0.781	0.533	0.547	0.901	0.99	0.595
784	447.1739953	396.1106334	398.1171687	162.0523134	2.006535366	787169.8791	1	1	0.559	0.51	0.561	0.437	0.641	0.474	0.569	0.383	0.612	0.454	0.578	0.434	0.73	0.69	0.636	0.608	0.664	0.695	0.656	0.64	0.918	0.805	0.965	0.806	0.752	0.768	0.64	0.69	2.439	2.322	0.666	0.847	0.533	0.526	0.545	0.631	0.586	0.575	0.764	0.822	0.566
786	447.7318889	418.091943	420.0986804	184.033623	2.006737408	18151.33333	1	1	0.571	0.507	0.622	0.48	0.626	0.522	0.574	0.403	0.608	0.49	0.598	0.45	0.749	0.672	0.678	0.536	0.652	0.606	0.7	0.552	0.989	0.76	0.987	0.786	0.77	0.743	0.675	0.703	2.398	2.277	0.658	0.98	0.521	0.545	0.534	0.674	0.602	0.584	0.81	0.782	0.564
788	448.5514308	385.6352219	387.6417126	303.1538038	2.006490696	3068.430769	2	2	1.595	1.096	1.724	1.368	0.762	0.69	0.743	0.584	0.784	0.921	0.849	0.802	0.713	0.824	0.846	1.153	0.58	0.91	0.92	1	0.47	0.471	0.706	0.764	0.943	1.025	0.621	0.645	1.029	0.898	0.65	1.108	1.104	1.082	1.07	0.988	0.786	0.863	0.97	0.921	0.787
789	449.5258824	770.2521141	772.2580402	536.1937941	2.005926015	3293.176471	1	1	0.877	0.956	1.158	1.335	0.713	0.713	0.648	0.644	0.615	0.724	0.885	0.817	0.631	0.579	1.073	0.83	0.905	0.844	1.176	0.97796058	0.932	0.858	0.64	0.775	1.146	0.827	1.072	1.169	0.889	0.945	0.482	0.533	0.689	0.4	0.663	1.104	0.859	0.97796058	0.749	0.97796058	1.104
790	449.6177564	354.0608535	356.0674837	240.0050669	2.006630194	9750.25641	2	2	0.666	0.746	0.665	0.704	0.596666655	0.6	0.565	0.552	0.649	0.592	0.586	0.589	0.711	0.691	0.639	0.711	0.874	0.791	0.759	0.785	0.728	0.705	0.768	0.636	0.786	0.914	0.744	0.79	0.784	0.71	0.635	0.397	0.49	0.55	0.589	0.722	0.546	0.564	0.655	0.632	0.79
791	449.6892737	459.169164	461.1757879	225.110844	2.006623891	13323.35196	1	1	0.948	0.534	0.717	0.36	0.637	0.529	0.732	0.587	0.703	0.606	0.871	0.624	0.689	0.555	0.721	0.558	0.879	0.472	0.937	0.795	0.651	0.518	0.567	0.322	0.358	0.347	0.327	0.286	0.387	0.344	0.548	1.162	1.256	1.205	1.387	0.668	0.834	0.704	0.741	0.709	0.456
792	449.8244615	454.0620554	456.0674645	220.0037354	2.005409132	5481.025641	1	1	0.1001	0.1001	0.1001	0.1001	0.1001	0.223	0.1001	0.1001	0.1001	0.1001	1.546	1.448	1.503	1.256	0.1001	0.143	0.15	0.543	0.505	0.464	0.1001	0.1001	0.1001	0.126	0.1001	0.129	1.99	1.962	0.1001	0.1001	0.1001	0.1001	0.1001	0.1001	0.1001	2.815	0.1001	0.1001	0.1001	0.1001	0.1001
794	449.9575	338.124531	340.1314643	104.066211	2.006933335	185914	1	1	0.186	0.1	0.213	0.1	0.272	0.1	0.312	0.1	0.236	0.1	0.232	0.1	0.261	0.1	0.433	0.1	0.22	0.1	0.389	0.1503684	0.45	0.1	0.1	0.1	0.333	0.1	0.722	0.1	0.192	0.212	0.467	0.418	0.298	0.768	0.289	0.228	0.1	1.362	0.1	1.049	0.317
796	450.0881007	455.1300527	457.1365124	221.0717327	2.006459761	8272.389262	1	1	0.667	0.793	0.306	0.29	0.58	0.474	0.61	0.546	0.429	0.306	0.382	0.246	0.488	0.462	0.676	0.636	0.675	0.577	1.075	0.82	1.121	0.899	0.658	0.555	0.523	0.736	0.263	0.386	0.742	0.98	0.525	0.554	0.719	0.77	0.589	0.425	0.278	0.401	1.184	1.012	0.428
797	450.1136889	422.175715	424.1802152	188.117395	2.004500186	4290.622222	1	1	1.105	1.51	1.277	1.773	1.339	1.105	1.229	1.087	1.004	0.787	0.881	0.993	1.501	1.235	1.153	1.249	1.12	0.965	1.988	2.589	1.546	1.158	0.959	0.953	1.088	1.25	1.204	1.189	1.099	1.118	1.011	0.827	1.456	1.138	1.326	1.077	0.742	0.836	1.092	1.212	1.232
798	450.2559568	402.0861528	404.0926679	168.0278328	2.006515098	892661.5135	1	1	0.929	1.059	1.46	1.458	0.809	0.659	0.69	0.622	0.718	0.724	1.086	0.897	0.56	0.473	1.339	1.07	1.01	1.225	1.243	1.028990623	1.02	1	0.658	0.603	1.046	0.917	1.215	1.162	1.092	1.042	0.465	0.529	0.615	0.616	0.656	1.165	0.893	1.104	0.846	0.829	1.37
799	450.36625	332.5921606	334.5989934	197.0676811	2.006832807	3992	2	2	0.722	0.522	0.52	1.018	0.908	0.594	1.048	0.411	0.52	0.355	0.755	0.637	0.636	0.62	0.833	0.438	1.004	0.582	0.52	0.52	0.43	0.479	0.614	0.508	0.625	0.587	0.52	0.537	0.492	0.546	0.825	0.205	0.676	0.773	0.633	0.443	0.811	0.52	0.727	0.52	0.817
800	450.411	751.2134355	753.2192996	517.1551155	2.005864119	8510	1	1	0.882827717	0.553	0.882827717	0.475	0.951	0.6	0.56	0.521	0.56	0.5	0.56	0.454	0.895	0.51	0.825	0.486	0.706	0.707	0.577	0.556	1.097	0.66	0.825	0.825	0.64	0.778	0.781	0.786	1.727	2.132	1.056	0.872	0.882827717	0.471	0.56	0.667	0.56	0.585	0.738	0.823	0.56
801	450.496	293.0956494	295.1007596	59.03732944	2.005110182	3900	1	1	0.794	0.672	0.451	0.682	1.041	3.124	0.877	3.481	0.8	2.326	0.68	2.881	1.361	5.683	0.721	1.967	0.947	3.197	0.803	2.03	1.278	4.94	1.523	1.43	0.893	1.467	1.008058923	1.14	0.73	1.05	0.687	0.597	1.39	1.313	0.764	0.898	1.527	1.264	1.086	1.213	1.277
803	451.0728864	567.1898735	569.1964052	333.1315535	2.006531712	17074.37879	1	1	0.664	0.732	0.76	0.75	1.131	1.041	0.478	0.436	0.571	0.512	0.479	0.423	0.836	0.949	0.325	0.311	0.118	0.515	0.548	0.605	0.1	0.1	0.247	0.247	0.549	0.696	0.375	0.407	0.495	0.526	0.567	0.354	0.846	0.891	0.802	0.427	0.195	0.208	0.23	0.198	0.1
805	451.388	493.2111991	495.21841	259.1528791	2.007210931	2817	1	1	0.782	0.936	1.035	0.912	0.513	0.475	0.544	0.446	0.466	0.434	0.446	0.535	0.81	0.739	0.462	0.611	0.624	0.562	0.553	0.45	0.543	0.439	0.326	0.477	0.553	0.55	0.249	0.477	0.821	0.724	0.353	0.146	1.117	1.214	0.944	0.581	0.377	0.364	1.226	1.034	0.742
806	451.442	412.1056662	414.1140222	178.0473462	2.008356017	2934	1	1	0.681	0.759	0.787	0.524	0.711	0.547	0.569	0.578	0.765	0.545	0.794	0.603	0.742	0.996	0.75	0.521	0.628	0.801	0.761	0.464	0.768	0.752	0.819	0.828	0.832	0.776	0.897	0.769	2.336	2.591	0.789	0.822	0.654	0.685	0.593	0.867	0.738	0.681	1.019	0.949	0.899
807	451.4885	481.1515071	483.1582712	247.0931871	2.006764064	3677	1	1	1.07	0.505	0.671	0.694	0.869	0.748	0.921	0.864	0.789	0.609	0.857	0.652	0.692	0.823	0.826	0.935833532	0.915	0.672833253	0.853	0.936970813	0.663	0.591	0.71	0.541	0.786	0.684	0.573	0.702	0.634	0.51	0.825	1.269	1.1	0.985	1.325	1.035	0.991	0.845	0.7	0.855	0.629
808	451.504	505.1443154	507.1534568	271.0859954	2.009141359	2188	1	1	6.15	8.24	6.922910513	9.99	8.19	9.11	6.06	7.96	8.243103059	9.99	8.27	9.99	5.05	6.85	4.164174733	9.99	2.871	9.99	8.22	9.99	7.86	7.79	6.13	7.36	6.1	6.37	9.74	9.1	9.93	6.511651925	5.81	7.92	1.194	2.19	1.840023688	7.73	1.175	3.725	2.114	5.193	1.536
809	451.999	459.1199792	461.1249478	225.0616592	2.004968654	4408	1	1	0.644	0.671	0.634	0.582	0.62	0.64	0.626	0.537	0.605	0.614	0.622	0.617	0.825	0.799	0.703	0.708	0.697	0.776	0.762	0.755	1.13	1.043	1.111	1.026	0.837	0.933	0.778	0.952	2.411	2.35	0.745	0.822	0.583	0.612	0.561	0.746	0.623	0.618	0.857	0.835	0.662
810	452.3083759	381.1110016	383.1176559	147.0526816	2.006654313	237298.0902	1	1	0.394	0.119	0.322	0.1	0.138	0.138	0.17	0.152	0.171	0.213	0.136	0.132	0.155	0.215	0.121	0.133	0.1	0.108	0.112	0.118	0.103	0.117	0.128	0.121	0.169	0.236	0.1	0.1	0.1	0.1	0.114	0.242	0.262	0.308	0.258	0.162	0.11	0.194	0.179	0.219	0.135
812	454.061	442.1512109	444.1578687	208.0928909	2.006657785	4490	1	1	1.391	1.109	0.11	0.11	0.153	0.814	3.496	3.223	0.231	0.266	0.275	0.281	0.345	0.428	0.253	0.158	0.204	0.543	2.13	2.01	0.155	0.267	2.066	1.837	1.571	1.501	0.393	0.398	0.29	0.286	0.295	0.362	0.145	0.137	0.338	0.652	0.183	0.11	1.94	1.949	0.608
814	454.3064706	366.1001114	368.1074512	132.0417914	2.007339838	5682.117647	1	1	0.53	0.559	1.162	1.086	0.906	0.738	1.335	1.075	0.767	0.652	0.683	0.623	0.962	1.014	0.824	0.756	1.18	0.766	0.874	0.947	0.853	0.718	1.05	0.864	0.871	0.904	0.782	0.991	1.138	1.187	0.652	0.764	0.978	0.906	0.75	0.759	1.286	1.53	1.934	2.285	1.056
815	454.3759011	317.1318663	319.1382834	83.07354626	2.006417097	5789.830435	1	1	0.957	0.857	0.973	0.838	0.91	0.821	0.888	0.776	0.956	0.801	0.976	0.953	1.002	0.797	0.934	0.759	0.925	0.833	0.938	0.797	0.92	0.793	0.946	0.819	0.913	0.856	0.923	0.88	0.863	0.799	0.86	0.791	0.842	0.807	0.828	0.865	0.806	0.858	0.853	0.807	0.857
816	454.545	557.2033192	559.2101332	323.1449992	2.006814016	1828	1	1	1.02	1.034	0.509	0.488	1.245	0.823	0.24	0.33	0.883	0.878	0.775	0.682	1.025	0.853	0.871	0.565	0.24	0.542	0.892	0.722	0.24	0.24	0.24	0.414	1.138	1.264	1.165	1.08	0.85	0.772	0.69	0.796	0.566	0.502	0.488	0.84	0.24	0.24	0.24	0.24	0.24
817	454.86025	354.0631229	356.0697844	240.0096058	2.006661471	10399	2	2	0.651	0.746	0.653	0.693	0.614	0.603	0.574	0.573	0.659	0.644	0.586	0.665	0.727	0.69	0.705	0.689	0.932	0.809	0.728	0.671	0.743	0.685	0.725	0.619	0.819	0.891	0.785	0.813	0.761	0.708	0.632	0.411	0.519	0.56	0.587	0.729	0.593	0.594	0.654	0.679	0.777
818	455.1778039	438.1687926	440.1753967	204.1104726	2.006604134	14278.11765	1	1	0.1	0.134	0.1	0.1	0.1	0.186	0.516	0.245	0.425	0.1	0.1	0.1	0.1	0.125	0.1	0.256	0.201	0.175	0.5	0.367	0.1	0.1	0.1	0.1	0.1	0.196	0.1	0.1	0.1	0.1	0.517	0.302	0.1	0.1	0.1	0.1	0.138	0.162	0.225	0.24	0.121
819	455.2399752	480.1795958	482.1860359	246.1212758	2.006440076	6504.833103	1	1	1.029	1.268	0.541	0.389	0.689	0.278	0.527	0.423	0.388	0.279	0.616	0.518	0.711	0.642	0.53	0.471	0.644	0.328	0.451	0.345	0.565	0.414	0.569	0.486	0.625	0.798	0.5	0.365	0.706	0.74	0.573	0.404	0.695	0.628	0.619	0.462	0.343	0.37	0.462	0.47	0.846
820	455.57	292.0997654	294.1055937	58.04144541	2.005828255	5836	1	1	0.547	0.657	0.551	0.598	0.702	0.64	0.579	0.634	0.66	0.6	0.631	0.657	0.77	0.872	0.66	0.702	0.719	0.723	0.57	0.754	0.737	0.739	0.665	0.626	0.658	0.736	0.612	0.705	0.389	0.528	0.616	0.832	0.519	0.585	0.562	0.745	0.485	0.617	0.457	0.733	0.399
824	456.5268057	437.137285	439.1437767	203.078965	2.006491696	24310.47393	1	1	0.679	0.637	0.66	0.553	0.71	0.605	0.658	0.474	0.608	0.589	0.622	0.541	0.82	0.734	0.731	0.687	0.698	0.754	0.754	0.702	1.147	0.921	1.108	0.98	0.916	0.882	0.792	0.878	2.564	2.424	0.776	0.931	0.606	0.61	0.592	0.769	0.678	0.649	0.866	0.888	0.667
827	457.3063333	666.2089674	668.2153813	432.1506474	2.006413901	2542.666667	1	1	0.699	0.693	0.759	0.454	0.588	0.481	0.929	0.572	0.64	0.597	0.529	0.805	0.639	0.652	0.758	0.667	0.623	0.544	0.738	0.845	1.115	0.72	0.921	0.756	0.64	0.787695917	0.773	0.679	1.764	1.377	0.702	0.964	0.5	0.497	0.626	0.687	0.594	0.544	0.783	0.711	0.651
828	457.598	475.3096906	477.3170552	482.5027411	2.007364606	5886	2	2	0.574	0.265	0.494	0.378832131	0.505	0.546524476	0.47	0.387220931	0.477	0.287	0.434	0.461005395	0.606	0.356	0.392	0.362250056	0.453	0.354917643	0.345	0.355122789	0.788	0.462	0.487	0.46344421	0.409	0.479667215	0.418	0.575	0.505	0.326	0.451	0.368	0.489	0.328	0.469	0.584	0.401	0.325	0.403	0.318	0.403
830	457.7946667	414.0638454	416.0702062	360.0110508	2.006360759	2921.666667	2	2	0.695	0.756	0.693	0.696	0.655	0.612	0.591	0.675	0.659	0.592	0.619	0.566	0.716	0.837	0.666	0.949	0.914	0.717	0.78	0.965	0.745	0.633	0.688	0.561	0.854	0.997	0.845	0.794	0.771	0.742	0.617	0.423	0.541	0.546	0.61	0.777	0.644	0.636	0.705	0.783	0.759
831	458.1199272	279.0796023	281.0862185	45.02128228	2.0066162	92779.40397	1	1	0.833	1.206	0.727	0.871	0.876	0.848	0.721	0.667	0.767	0.766	0.751	0.79	1.127	1.273	0.687	0.783	0.793	0.869	0.666	0.77	0.687	0.802	0.897	0.908	0.87	1.071	0.618	0.722	0.514	0.526	0.835	1.187	0.775	0.754	0.74	0.752	1.085	1.241	0.69	0.715	0.565
832	458.3863694	462.1309976	464.1387861	228.0726776	2.007788532	4133.566879	1	1	1.558	1.384	2.066	1.391	2.016	1.281	1.237	0.975	1.383	1.074	1.361	0.765	1.414	1.514	1.618	1.427	1.722	1.498	1.872	1.813	2.079	1.586	2.291	1.591	1.82	1.947	2.407	1.778	1.236	1.859	1.809	1.257	1.349	2.046	1.689	1.192	1.396	3.141	1.765	1.956	1.39
833	458.5554095	492.1431254	494.1496213	258.0848054	2.006495869	7652.009524	1	1	0.887	0.914	0.647	0.589	0.984	0.764	0.653	0.68	0.807	0.664	0.877	0.661	1.013	0.904	0.979	0.724	0.798	0.568	0.812	0.807	1.16	1.085	0.883	0.875	1.019	0.916	0.945	1.266	0.632	0.702	0.73	0.648	0.627	0.664	0.677	0.718	0.746	0.756	0.849	0.775	0.832
834	458.6191818	478.2005045	480.2068613	244.1421845	2.006356749	3245.818182	1	1	0.722	0.658	0.938	0.946	0.613	0.29	0.703	0.497	0.742	0.425	0.752	0.796	0.499	0.346	0.599	0.487	2.23	0.481	0.823	0.515	0.639	0.358	0.569	0.409	0.545	0.387	0.665	0.425	0.56	0.646	0.91	0.635	0.708	0.737	0.683	0.676	1.552	1.531	1.583	1.602	1.993
835	458.621	497.3223253	499.3290324	526.5280105	2.006707154	2566	2	2	0.538	0.54	0.525	0.445	0.5	0.371	0.606	0.453	0.529	0.42	0.615	0.414	0.556	0.442	0.435	0.364	0.542	0.34	0.532	0.321	0.548	0.596	0.576	0.517	0.495	0.367	0.592	0.496	0.576	0.397	0.544	0.392	0.415	0.431	0.593	0.462	0.526	0.348	0.446	0.352	0.485
838	458.8185455	571.1842202	573.1910366	337.1259002	2.006816443	3648.565657	1	1	0.746	0.86	0.762	0.699	1.1	1.098	0.759	0.701	1.162	1.121	0.536	0.505	1.552	1.589	0.614	0.616	0.383	0.69	0.8	0.855	0.594	0.576	0.343	0.383	1.099	1.074	0.512	0.589	0.604	0.554	1.072	0.513	1.256	1.225	1.185	0.661	0.462	0.36	0.312	0.307	0.428
841	461.2275294	309.1264244	311.132941	75.06810439	2.006516604	5755.882353	1	1	0.906	0.812	0.74	0.81	0.977	0.612	1.047	0.732	0.711	0.807	0.813	0.648	1.074	0.601	1.022	0.837	0.955	0.838	0.82	0.789	1.249	1.059	1.352	1.035	0.961	1.066	0.895	1.09	0.756	0.699	1.192	1.092	1.11	1.079	0.866	0.762	0.764	0.851	1.009	0.714	0.612
842	461.2453846	354.0607344	356.0674352	240.0048289	2.006700777	7351.538462	2	2	0.702	0.742	0.655	0.707	0.620470099	0.602	0.574	0.561	0.671	0.601	0.579	0.591	0.711	0.694	0.747	0.698	0.828	0.796	0.743	0.788	0.738	0.693	0.732	0.631	0.797	0.909	0.775	0.801	0.806	0.701	0.637	0.414	0.516	0.532	0.575	0.77	0.545	0.585	0.7	0.683	0.788
843	461.2755	496.0727951	498.0785275	262.0144751	2.005732391	3393.230769	1	1	0.336	0.444	0.1	0.1	1.125	0.965	0.541	0.545	0.175	0.1	0.513	0.513	0.503	0.57	0.223	0.251	0.164	0.141	0.534	0.632	0.424	0.483	0.229	0.243	1.251	1.577	1.994	2.144	0.195	0.236	0.225	0.183	0.1	0.1	0.1	1.632	0.249	0.148	0.1	0.1	0.246
844	461.2768855	707.1176237	711.1310479	240.0082837	4.013424194	10316.28011	1	2	0.598	0.762	0.635	0.705	0.635	0.573	0.607	0.549	0.661	0.56	0.561	0.565	0.702	0.765	0.672	0.773	0.924	0.84	0.729	0.832	0.753	0.744	0.694	0.619	0.849	0.843	0.802	0.775	0.803	0.689	0.666	0.428	0.527	0.522	0.597	0.71	0.626	0.628	0.672	0.703	0.769
850	462.7585	512.1849727	514.1905414	278.1266527	2.005568688	2052	1	1	1.003	1.39	1.204	1.163	0.496	0.874	0.58	0.779	0.465	0.98	0.595	0.813	0.66	2.868	0.66	0.546	1.855	2.68	0.557	0.639	0.66	1.672	0.952909038	5.245	0.456	1.018	0.624	0.609	0.554	0.638	0.66	2.112	0.647	0.663	0.611	0.667	1.361	1.523	1.76	1.71	1.915
851	463.2693488	561.0809284	563.086931	327.0226084	2.006002592	4155.147287	1	1	0.507	1.007	0.471	0.819	0.558	0.932	0.427	0.764	0.631	0.571	0.611	0.498	0.432	0.76	0.476	1.019	0.742	0.867	0.356	0.893	0.188	0.35	0.165	0.37	0.487	0.871	0.567	0.73	0.47	0.746	0.514	0.93	0.872	0.833	0.528	0.599	0.854	0.848	0.485	0.471	0.421
852	463.5978621	737.1915014	739.1978038	503.1331814	2.006302336	7903.965517	1	1	0.629	0.544	0.54	0.414	0.643	0.535	0.679	0.354	0.539	0.51	0.734	0.416	0.76	0.664	0.733	0.515	0.691	0.496	0.729	0.623	1.104	0.807	0.924	0.753	0.716	0.858	0.728	0.764	2.074	1.476	0.529	0.715	0.56	0.527	0.682	0.741	0.576	0.636	0.692	0.856	0.601
853	463.816	801.1990136	803.2055838	567.1406936	2.006570133	2752	1	1	0.41	0.43414274	0.854	0.651	1.07	0.667	1.088	0.576695372	1.01	0.385	0.918	0.917927653	0.857	1.049	0.966	0.999	0.765	0.906576703	1.167	1.528	0.806	0.921	1.133	0.779568702	1.127	1.261	1.146	1.48374868	1.137	0.41	1.046	0.97	0.859	0.802	0.932	0.777	0.801	0.824	0.986	0.994	1.033
854	464.780381	396.1109437	398.1175181	162.0526237	2.00657442	471714.2381	1	1	0.565	0.442	0.571	0.409	0.655	0.516	0.571	0.391	0.599	0.491	0.609	0.461287058	0.758	0.695	0.667	0.604	0.662	0.682	0.658	0.626550092	0.938	0.777	0.965	0.897	0.771	0.819	0.652	0.814	2.43	2.305	0.66	0.886	0.537	0.528	0.565	0.648	0.585	0.578	0.771	0.818	0.566
855	464.9230977	460.1169181	462.1234128	226.0585981	2.006494705	155882.4465	1	1	0.412	0.441	0.738	0.713	1.055	0.886	0.819	0.68	0.845	0.726	0.974	0.795	0.932	0.748	1.272	1.054	0.628	0.706	1.232	1.245	1.047	0.865	0.949	0.769	1.112	0.997	1.497	1.572	0.903	0.885	1.042	1.059	0.927	0.925	0.991	0.917	0.748	0.736	0.828	0.843	1.013
856	466.94036	536.2413449	538.247667	302.1830249	2.00632206	2880.96	1	1	0.947	0.825	3.65	3.065	1.555	1.725	0.806	0.743	1.772	1.708	0.73	0.8	1.054	1.112	1.168	0.922	0.14	0.881	0.993	0.97	1.241	1.092	0.659	0.616	1.102	1.195	0.319	0.41	2.152	2.352	1.377	0.861	0.556	0.435	0.525	2.473	0.14	0.14	0.14	0.14	0.14
857	467.1427196	370.0962977	372.1029107	136.0379777	2.006613048	61070.14953	1	1	0.265	0.21	0.853	0.828	0.595	0.602	0.691	0.88	0.527	0.594	0.465	0.528	0.713	0.654	0.397	0.366	0.423	0.431	0.488	0.626	0.334	0.377	0.434	0.458	0.77	0.854	1.017	1.184	0.386	0.461	0.615	0.271	0.808	0.754	0.706	0.301	0.421	0.37	0.417	0.403	0.296
858	467.3082174	480.1431017	482.1497731	246.0847817	2.006671424	4317.826087	1	1	0.887	1.042	0.797	1.028	0.824	0.865	0.848	0.713	0.853	0.93	0.756	0.818	0.93	0.855	1.196	0.846	0.82	0.941	0.94	1.126	1.335	1.183	1.213	1.359	1.491	1.584	1.264	1.518	0.912	0.974	0.657	0.881	1.035	1.042	0.986	0.872	0.706	0.776	0.937	0.775	0.775
859	467.3915962	437.1372451	439.1437662	203.0789251	2.006521103	12466.93269	1	1	0.667	0.651	0.657	0.568	0.738	0.599	0.652	0.492	0.607	0.539	0.623	0.486	0.849	0.783	0.749	0.792	0.706	0.802	0.752	0.725	1.149	0.966	1.096	1.064	0.915	0.885	0.777	0.885	2.463	2.403	0.778	0.939	0.607	0.606	0.596	0.76	0.667	0.647	0.868	0.869	0.665
861	468.8512973	480.1795327	482.1858175	246.1212127	2.006284789	3425.72973	1	1	1.15	1.215	0.544	0.433	0.443	0.361	0.498	0.481	0.389	0.284	0.553	0.563	0.647	0.79	0.532	0.526	0.715	0.394	0.451	0.57	0.675	0.728	0.563	0.542	0.661	0.802	0.393	0.362	0.718	0.745	0.555	0.398	0.537	0.595	0.567	0.434	0.349	0.366	0.437	0.462	0.918
863	470.0136591	399.1001956	401.1066361	165.0418756	2.00644056	30706.13636	1	1	0.678	0.734	0.809	0.807	0.348	0.237	0.756	0.53	1.184	0.945	0.535	0.509	0.794	0.812	0.651	0.669	1.047	0.777	0.515	0.452	3.828	3.66	2.231	1.815	0.889	0.948	0.545	0.463	0.749	0.686	0.736	0.838	0.383	0.341	0.417	0.398	0.738	0.825	0.862	0.959	1.022
864	470.2528462	354.0633997	356.0698719	240.0101595	2.006472145	4018.923077	2	2	0.673	0.723	0.669	0.708	0.631	0.603	0.563	0.693	0.686	0.58	0.587	0.609	0.73	0.682	0.694	0.681	0.935	0.794	0.726	1.393	0.735	0.702	0.749	0.591	0.829	0.933	0.821	0.767	0.772	0.701	0.637	0.415	0.515	0.556	0.589	0.738	0.598	0.596	0.666	0.652	0.769
865	470.3305424	466.2001369	468.2066614	232.1418169	2.00652455	12561.19774	1	1	0.552	0.697	2.259	2.507	1.077	0.951	1.451	1.352	0.341	0.332	0.675	0.64	2.055	1.937	0.631	0.579	0.679	0.709	1.218	1.317	0.536	0.496	0.154	0.141	2.133	2.572	0.189	0.177	0.855	0.961	0.21	0.154	1.759	1.592	1.37	1.619	0.172	0.182	0.316	0.307	0.756
866	470.5118454	383.1058118	385.1121608	149.0474918	2.006348994	9252.967033	1	1	0.957	1.336	1.279	1.025	0.928	1.062	1.457	1.036	0.51	0.675	0.722	0.943	1.185	1.603	1.1	1.171	0.33	1.146	1.402	1.399	0.623	0.615	0.707	0.634	0.862	0.727	0.881	0.771	0.578	0.88	0.82	1.907	1.026	1.157	1	0.848	0.812	0.745	1.009	0.934	0.769
868	471.3878333	420.1583875	422.1650176	186.1000675	2.006630073	175729.3333	1	1	0.657	0.605	0.59	0.438	0.53	0.436	0.657	0.519	0.635	0.607	0.903	0.785	0.695	0.62	0.554	0.435	0.706	0.374	0.659	0.621	0.534	0.401	0.414	0.326	0.351	0.363	0.489	0.546	0.614	0.632	0.393	0.274	1.121	1.108	1.093	0.658	0.399	0.381	0.344	0.33	0.475
869	472.025	513.1806689	515.1869575	279.1223489	2.006288525	2368	1	1	0.881	0.853	1.5	1.4	1.531	1.301	1.363	1.279	0.845	0.488	1.053	0.902	1.989	1.445	0.457	0.363931119	0.977	0.807	0.901	0.904	4.824	6.462358531	1.408	1.559	1.221	1.453	0.612	0.398	1.301	1.023	0.358	0.35	1.14	1.023	1.032	0.546	1.035289737	0.268	0.682	0.45	1.107
872	474.04	304.0408087	306.0486329	69.98248872	2.007824166	2934	1	1	1.519	1.28	1.402	1.454	1.434	1.135	1.286	1.148	1.3	1.634	1.253	1.289	1.629	1.501	1.491	1.571	1.372	1.677	1.614	1.385	1.875	1.762	1.729	1.588	1.857	1.751	1.811	1.631	1.622	1.652	1.251	1.24	1.045	1.331	1.29	1.286	1.349	1.346	1.373	1.67	1.265
874	474.4101262	337.1211306	339.1278	103.0628106	2.006669405	205168.7757	1	1	0.633	0.388	0.46	0.504	0.541	0.442	0.604	0.454	0.427	0.366	0.656	0.459	0.498	0.487	1.046	1.022	0.679	0.895	0.696	0.739	1.113	1.051	0.719	0.728	0.631	0.704	1.291	1.723	0.627	0.654	0.808	0.539	0.496	0.507	0.502	0.48	0.751	0.826	0.777	0.78	0.586
875	474.7187303	512.1487519	514.1551212	278.0904319	2.006369381	9025.640449	1	1	0.373	0.359	0.385	0.347	0.717	0.68	0.692	0.597	0.769	0.684	0.315	0.287	0.442	0.487	0.278	0.236	0.327	0.227	0.531	0.505554176	0.1001	0.1001	0.1001	0.174	0.698	0.717	0.667	0.776	0.356	0.316	0.422	0.745	0.459	0.448	0.454	0.684	1.167	1.177	0.515	0.538	0.271
876	474.80675	275.5427122	277.5490964	82.96878438	2.006384236	4410.5	2	2	2.607	2.606	3.375	2.521	2.708	2.267	2.362	2.178	2.759	2.467	2.398	2.024	3.706	2.671	3.151	2.621	2.199	3.129	2.759	2.631	4.515	3.877	4.338	3.436	3.861	3.39	3.408	3.275	2.984	2.871	2.213	2.251	2.394	2.276	2.789	3.13	2.284	2.172	3.071	2.801	2.206
877	475.0375	304.0419885	306.0489224	139.9673369	2.006933955	3957	2	2	1.519	1.28	1.402	1.454	1.376	1.135	1.286	1.148	1.3	1.634	1.253	1.289	1.647	1.531	1.499	1.551	1.372	1.677	1.614	1.461	1.875	1.744	1.729	1.618	1.857	1.751	1.647	1.631	1.579	1.535	1.345	1.24	1.045	1.265	1.29	1.286	1.349	1.335	1.418	1.67	1.265
880	475.688	284.5476916	286.5535612	100.9787433	2.005869539	8629.75	2	2	2.615	2.439	2.691	2.179	2.777	2.282	2.508	1.886	2.692	2.261	2.251	2.061	3.529	2.908	3.185	2.477	2.474	2.675	2.38	2.483	4.606	3.93	4.343	3.387	3.597	3.434	3.296	3.472	3.232	2.724	2.554	1.836	2.634	2.312	2.73	2.994	2.012	2.239	2.789	2.693	2.524
882	476.787	490.0777059	492.0833042	512.0387718	2.005598238	5592.133333	2	2	0.687	0.628	0.704	0.628	0.707	0.564	0.64	0.6	0.572	0.555	0.595	0.513	0.895	0.722	0.801	0.675	0.655	0.772	0.646	0.65	1.04	0.98	0.953	0.883	0.906	0.841	0.786	0.86	0.697	0.604	0.618	0.539	0.53	0.548	0.684	0.787	0.653	0.568	0.729	0.71	0.596
883	476.8126538	491.582273	493.5880624	257.523953	2.005789407	6421.384615	1	1	3.177	2.602	3.112	2.921	2.528	2.608	2.398	2.271	3.052	2.527	2.91	2.275	3.315	3.174	3.022	2.894	2.649	3.205	3.02	2.862	3.981	3.951	3.722	3.462	4.245	3.497	3.212	4.019	3.507	2.828	2.535	2.363	1.987	2.574	2.984	2.979	2.397	2.334	3.128	2.634	2.544
884	477.0453182	296.0554229	298.0615462	123.9942059	2.006123293	3171.909091	2	2	2.61	2.08	2.597	2.016	2.683	2.085	2.351	1.898	2.321	2.145	2.232	1.998	3.375	2.577	2.782	2.361	2.174	2.757	2.52	2.288	3.772	3.745	3.793	3.311	3.7	3.248	3.061	2.834	2.905	2.645	2.5	1.916	2.176	2.102	2.467	2.834	2.161	1.978	2.542	2.841	2.234
885	477.7850574	378.0668476	380.071764	144.0085276	2.004916371	22257.45455	1	1	1.258	1.146	1.263	0.929	1.779	1.33	1.662	1.198	1.58	1.249	1.532	1.048	2.014	1.457	1.742	1.42	1.1	1.277	1.581	2.33	1.917	1.7	1.843	1.228	1.622	1.78	0.935	1.195	0.618	1.025	0.987	1.963	1.508	1.322	1.123	1.019	0.978	1.006	1.288	1.213	0.728
887	478.7898349	351.1368328	353.1434076	117.0785128	2.00657472	15833.80189	1	1	0.829	0.827	0.872	1.04	0.546	0.534	0.81	0.759	0.82	0.767	0.59	0.618	1.158	0.959	1.092	0.967	1.342	0.81	0.568	0.649	1.076	0.96	0.811	0.622	0.872	0.935	0.59	0.752	0.464	0.561	0.59	1.057	1.024	1.113	0.819	0.62	0.548	0.579	0.974	0.929	0.676
888	479.1758621	391.1427716	393.1493757	157.0844516	2.006604104	9787.172414	1	1	0.857	0.697	0.645	0.5	0.648	0.707	0.653	0.568	0.643	0.692	0.633	0.757	0.594	0.669	0.911	0.925	0.724	0.834	0.827	0.797	0.929	0.973	0.794	0.746	0.453	0.595	0.627	0.85	0.595	0.633	0.569	1.774	0.771	0.653	0.676	0.613	0.662	0.646	0.749	0.669	0.462
889	479.2398	392.1274789	394.1335265	158.0691589	2.006047578	6535.6	1	1	0.267	0.37	0.614	0.612	0.331	0.348	0.97	0.725	0.621	0.185	0.306	0.475477915	0.327	0.382	0.173	0.312	1.218	0.24	0.288	0.335	0.281	0.287	0.291	0.233	0.379	0.501	0.242	0.309	0.584	0.524	0.201	0.768	0.472	0.461	0.588	0.349	1.243	1.218	1.762	1.579	1.616
891	479.7834157	528.1793167	530.1858085	294.1209967	2.006491759	13845.73034	1	1	0.673	0.599	0.823	0.81	0.964	0.947	0.639	0.687	0.693	0.702	0.648	0.523	0.897	1.139	0.55	0.337	0.482	0.623	0.929	1.138	0.38	0.112	0.476	0.332	0.935	1.339	0.473	0.491	0.644	0.701	0.521	0.347	0.869	0.936	0.851	0.601	0.373	0.367	0.343	0.269	0.248
892	480.1295535	386.0912838	388.0978321	152.0329638	2.006548337	144220.3535	1	1	0.504	0.547	0.937	0.911	0.823	0.665	0.924	0.782	0.639	0.594	0.738	0.589	0.877	0.739	0.79	0.599	0.423	0.599	0.948	0.855	0.362	0.318	0.507	0.426	1.008	0.938	1.084	1.121	1.198	1.26	0.662	0.61	0.889	0.988	1.04	0.987	0.623	0.625	0.507	0.552	0.318
894	481.26	710.1639507	712.1638072	476.1056307	1.999856518	1920	1	1	1.615	1.707463478	1.965	1.908	2.059	1.283894577	1.946	1.48	1.75	0.72	1.848	2.5	1.899	1.997	1.585	1.524	1.986	1.831	1.726	1.422330408	0.86	1.771988763	0.71	0.63	2.521	1.528	1.721	1.363	2.295	1.714	1.633	1.34	1.488	2.3	1.495	1.935	2.034	0.61	1.965	2.193	1.759
895	481.5896364	335.1058337	337.1136484	101.0475137	2.007814705	10801.45455	1	1	1.159	1.336	1.029	0.931	1.462	1.15	0.771	0.521	0.866	0.97	1.278	0.875	0.927	0.864	0.872	1.191	1.717	2.283	1.326	1.333	1.073	1.209	0.762	0.918	1.172	1.754	0.838	1.138	0.677	1.036	0.997	1.415	1.218	1.168	1.507	1.12	1.139	1.369	0.616	0.844	1.773
896	482.8573953	422.1731723	424.1806717	188.1148523	2.007499377	4730	1	1	0.924	1.269	1.102	1.264	1.056	1.036	0.79	0.671	0.664	0.598	0.877	0.707	1.273	1.405	0.795	0.602	0.682	0.631	1.027	1.154	0.788	1.269	0.742	0.75	0.864	1.184	0.733	0.617	0.926	1.007	0.75	0.775	1.326	1.16	1.146	0.842	0.448	0.452	0.846	0.702	0.707
897	483.2306486	438.1686021	440.1754253	204.1102821	2.006823236	26678.62162	1	1	0.1	0.104	0.1	0.1	0.1	0.161	0.54	0.225	0.439	0.1	0.1	0.1	0.1	0.131	0.1	0.232	0.205	0.163	0.507	0.342	0.1	0.1	0.1	0.1	0.1	0.187	0.1	0.1	0.1	0.1	0.528	0.326	0.1	0.1	0.1	0.1	0.138	0.154	0.221	0.234	0.12
898	483.7309773	514.1631757	516.1700399	280.1048557	2.006864202	3715.272727	1	1	0.894	0.91	0.507	0.573	0.739	0.672	0.58	0.551	0.572	0.619	0.64	0.705	0.878	0.825	0.62	0.575	0.538	0.621	0.681	0.679	0.633	0.599	0.537	0.506	0.857	1.061	0.624	0.74	0.857	0.826	0.747	0.588	0.878	0.914	0.915	0.568	0.537	0.491	0.583	0.583	0.839
899	483.7740164	406.142612	408.1492857	172.084292	2.006673729	29934.77596	1	1	0.629	0.567	1.405	1.269	0.89	0.809	2.172	1.909	0.867	0.804	0.683	0.615	0.984	0.989	0.837	0.783	0.1	0.9	1.123	1.039	0.1	0.1	0.369	0.318	1.247	1.422	0.673	0.691	2.656	2.528	0.942	1.646	1.288	1.244	1.201	1.11	0.14	0.151	0.1	0.1	0.1
900	483.7995	550.1497454	552.1563188	316.0914254	2.006573415	2038	1	1	0.566	0.753	0.804	0.969	0.843	0.713914037	0.525	0.732716023	0.758	0.579	0.839	0.64499008	0.708	0.86	1.081	0.75	0.789	0.901	0.828	0.726379781	0.85	1.113	1.255	1.018	1.132	0.85	0.808	0.728	0.868	0.857	0.422	0.394	0.86	0.675	0.832	0.626	0.954	0.819	1.088	0.995	0.572
902	484.07	311.5929681	313.6000932	155.0692962	2.007125142	2924	2	2	0.346	0.434	0.28	0.403	0.43	0.398	0.483	0.431	0.363	0.306	0.406	0.251	0.6	0.473	0.496	0.343	0.574	0.318	0.454	0.59	0.507	0.333	0.576	0.34	0.495	0.858	0.406	0.573	0.327	0.412	0.377	0.258	0.455	0.497	0.364	0.304	0.802	0.83	0.623	0.949	0.504
903	484.5103333	488.1847228	490.1910593	254.1264028	2.006336563	3177.933333	1	1	1.168	1.246	0.745	0.739	1.052	0.705	0.348	0.486	0.885	0.965	0.887	0.842	0.906	0.927	0.635	0.461	1.279	0.646	0.582	0.45	0.698	0.677	0.922	0.891	0.536	0.47	0.487	0.592	0.612	0.465	1.11	0.477	0.504	0.62	0.67	1.173	0.591	0.669	0.331	0.337	0.82
905	484.9912483	367.1315274	369.1385371	133.0732074	2.007009661	7444.813544	1	1	1.028	1.215	0.571	0.45	0.912	0.911	0.517	0.6	0.83	0.753	0.763	0.49	0.504	0.622167805	0.992	1.222	0.656	0.521	0.716	0.685090907	0.711	0.637344589	0.653	0.628003034	0.58	0.752	0.732	0.724	0.411	0.393	1.372	0.737	0.801	1.112	0.526	0.621	0.577	0.606	0.838	0.776	0.684
906	484.9939077	399.0669663	401.0733009	165.0086463	2.006334585	12594.76923	1	1	0.77	1.012	1.405	1.351	0.831	1.166	0.701	0.838	1.301	0.992	1.067	0.853	0.632	1.132	0.807	1.387	1.536	1.127	0.753	1.02	0.851	0.934	1.071	1.403	1.013	1.467	0.718	0.792	0.842	1.026	0.638	0.442	1.1	1.188	0.866	1.112	1.158	1.067	1.126	1.123	1.037
908	485.4771333	365.0800487	367.0865174	131.0217287	2.006468631	5186.133333	1	1	0.947	1.015	0.776	0.689	1.073	0.915	1.159	0.803	0.926	0.839	0.679	0.68	0.916	1.031	0.923	0.889	0.675	0.855	0.889	1.012	0.799	0.871	1.114	0.94	0.975	1.41	0.741	0.736	0.621	0.695	0.98	1.095	0.972	0.812	0.987	0.78	0.429	0.522	0.753	0.725	0.54
911	486.7578571	440.0622822	442.0686658	206.0039622	2.006383538	6267.714286	1	1	0.343	0.339	0.282	0.338	0.273	0.271	0.237	0.204	0.345	0.255	0.251	0.233	0.358	0.386	0.307	0.261	0.563	0.347	0.234	0.334	0.337	0.318	0.355	0.272	0.352	0.437	0.35	0.372	0.328	0.41	0.282	0.492	0.253	0.239	0.253	0.278	0.349	0.377	0.347	0.354	0.308
912	486.8313333	377.6138891	379.6201614	287.1111382	2.006272278	2332.333333	2	2	0.701	0.745	0.808	0.653	0.517	0.711	0.614	0.458	0.863	0.767	0.562	0.508	0.479	0.598	0.824	0.795	0.698	0.74	0.824	0.771	0.662	0.717	0.898	0.698	0.909	1.204	0.846	0.898	0.516	0.559	0.424	0.398	0.711	0.693	0.723	0.621	0.486	0.699	1.013	0.79	0.597
913	486.9547778	339.1347586	341.1426736	105.0764386	2.007914992	5371.111111	1	1	0.904	0.953	0.776	0.667	0.986	1.003	1.015	0.821	1.001	0.791	0.634	0.567	0.669	0.728	0.772	0.825	0.549	0.639	0.99	1	1.039	0.928	0.919	0.738	0.569	0.676	0.663	0.86	0.464	0.535	0.742	1.045	0.982	0.952	0.978	0.806	0.501	0.452	0.523	0.485	0.449
915	488.0164605	494.1950993	496.2016285	260.1367793	2.006529232	82449.97209	1	1	1.077	1.108	0.901	0.926	0.523	0.484	0.372	0.385	0.761	0.7	0.835	0.737	0.633	0.649	0.82	0.826	0.556	0.532	0.748	0.792	0.587	0.54	0.765	0.708	0.502	0.592	0.413	0.463	0.674	0.653	0.433	0.279	0.57	0.585	0.547	0.714	0.604	0.596	0.472	0.436	0.477
917	489.47132	321.1265361	323.1335712	87.0682161	2.007035077	41560.72	1	1	0.904	0.948	0.837	0.715	0.941	0.991	0.977	0.832	1.014	0.853	0.697	0.578	0.754	0.744	0.777	0.843	0.569	0.685	1.038	0.967	1.055	0.911	0.87	0.768	0.562	0.729	0.684	0.839	0.425	0.538	0.719	1.052	1.03	1.034	0.865	0.854	0.496	0.492	0.526	0.512	0.448
918	489.5973503	408.1582121	410.1648077	174.0998921	2.006595614	353031.0169	1	1	0.427	0.45	0.998	0.94	0.654	0.598	1.562	1.385	0.618	0.528	0.526	0.477	0.652	0.681	0.582	0.531	0.1	0.613	0.783	0.79	0.1	0.1001	0.209	0.214	0.933	1.071	0.45	0.499	1.92	2.149	0.714	0.37	0.943	0.951	0.798	0.779	0.118	0.109	0.1	0.1	0.1
919	490.3167434	500.1845379	502.1909648	266.1262179	2.006426951	5795.434211	1	1	0.254	0.273	1.188	1.301	0.713	0.56	0.96	0.776	0.479	0.466	0.394	0.336	0.814	0.785	0.31	0.267	0.258	0.401	0.722	0.632	0.158	0.171	0.27	0.226	1.025	1.258	0.529	0.483	0.953	0.869	0.431	0.261	1.273	1.303	1.172	0.695	0.169	0.159	0.219	0.215	0.246
922	491.662243	481.1271111	483.1336365	247.0687911	2.006525437	21566.97196	1	1	0.599	0.306	0.62	0.269	0.736	0.473	0.658	0.408	0.707	0.48	0.63	0.487	0.759	0.666	0.705	0.477	0.635	0.53	0.7	0.537	0.961	0.686	1.012	0.734	0.724	0.705	0.627	0.645	2.42	2.229	0.668	0.764	0.531	0.563	0.66	0.732	0.611	0.618	0.803	0.859	0.47
923	491.735375	343.1087245	345.1167582	109.0504045	2.008033724	10442	1	1	0.823	1.024945577	0.824	0.752222821	0.971	0.954069079	1.042	0.897351683	0.992	0.814273703	0.66	9.99	0.745	0.868556143	0.804	0.70241236	0.558	0.815275093	0.996	9.99	1.003	9.16	0.839	0.748206699	0.566	0.708294294	0.7	0.792576966	0.435	0.564	0.772	1.065	0.995	1.023	0.925	0.878	0.51	0.504	0.538	0.552	0.432
926	493.3346324	436.1894148	438.1960045	202.1310948	2.006589683	4263.764706	1	1	0.307	0.356	0.652	0.559	0.235	0.168	1.878	1.605	0.639	0.663	3.837	3.076	0.577704268	0.11	0.871	0.633	0.539198307	1.651	0.229	0.124	0.365	0.342	0.249	0.216	0.304	0.222	0.225	0.188	0.145	0.133	0.14	0.129	1.025	0.98	1.018	0.854	3.09	2.869	0.192	0.166	0.259
927	493.4613333	459.1697656	461.176034	225.1114456	2.006268414	2169.333333	1	1	0.92	0.843	0.91	0.853	0.652	0.432	0.797	0.709	0.667	0.706	0.968	0.819	0.77	0.43	0.806	0.549	1.036	0.562	0.899	0.966	0.748	0.585	0.557	0.497	0.444	0.482	0.446	0.509	0.406	0.384	0.506	1.017	1.337	1.311	1.412	0.671	0.957	0.749	0.789	0.73	0.591
929	495.913375	409.1066303	411.1129689	175.0483103	2.006338621	8893.25	1	1	0.961	0.589	0.61	0.355	0.516	0.809	0.332	0.351	0.541	0.642	0.422	0.571	0.438	0.946167746	0.389	0.582003033	0.69	0.841913888	0.538	0.630247751	0.433	0.636642279	0.605	0.466	0.473	0.537	0.624	0.526	0.606	0.666	0.511	0.813	0.361	0.69	0.634	0.594	0.69	0.630247751	0.69	0.630247751	0.69
930	496.2203333	550.2570046	552.2635575	316.1986846	2.006552927	15629.12698	1	1	0.483	0.493	4.472	4.306	1.936	1.577	1.057	0.972	1.519	1.388	0.773	0.738	0.892	0.877	0.715	0.688	0.197	1.193	0.633	0.575	0.42	0.402	0.44	0.37	1.469	1.596	0.321	0.354	2.782	2.951	1.674	1.012	0.441	0.438	0.425	2.22	0.1001	0.1001	0.1001	0.1001	0.1001
931	497.9394286	310.1102125	312.1162763	76.05189251	2.006063765	4110.857143	1	1	0.512	0.708	0.58	0.639	0.628	0.614	0.602	0.636	0.679	0.618	0.686	0.659	0.75	0.829	0.642	0.685	0.677	0.797	0.606	0.762	0.758	0.755	0.673	0.645	0.603	0.77	0.584	0.672	0.45	0.508	0.614	0.812	0.464	0.571	0.569	0.719	0.473	0.565	0.506	0.673	0.381
933	498.794217	376.0960159	378.1025923	142.0376959	2.006576418	41094.56604	1	1	0.901	0.397	0.605	0.291	0.547	0.44	0.386	0.381	0.693	0.474	0.487	0.336873732	0.687	0.674	0.496	0.40065002	0.444	0.471	0.348	0.25	0.491	0.488	0.63	0.568	0.612	0.819	0.439	0.63	0.4	0.28	0.598	0.639	0.626	0.414	0.475	0.535	0.772	0.603	0.601	0.25	0.561
934	499.3752009	337.1211708	339.1278104	103.0628508	2.006639567	3604662.178	1	1	0.886	1.076	0.488	0.521	0.669	0.528	0.772	0.696	0.488	0.446	0.789	0.717	0.506	0.514	1.058	0.911	1.105	0.66	0.829	0.858	1.209	1.222	0.655	0.624	0.593	0.624	0.595	0.65	0.979	1.039	0.811	0.369	0.42	0.481	0.419	0.587	0.495	0.637	0.747	0.711	0.552
936	501.5524093	321.0899435	323.0967816	87.03162346	2.006838156	132099.5907	1	1	0.931	1.005	0.783	0.699	1.007	0.981	1.045	0.908	0.895	0.738	0.698	0.631	1.076	1.189	0.859	0.851	0.677	0.807	0.96	0.9	0.868	0.778	1.086	0.987	1.023	1.228	0.774	0.835	0.686	0.687	1.013	0.877	1.098	1.123	1.024	0.78	0.488	0.501	0.786	0.823	0.596
940	503.8863462	770.2101503	772.2162829	536.1518303	2.006132634	3120.846154	1	1	0.59	0.175	1.523	1.502	0.402	0.373	0.611	0.492	0.515	0.455	1.316	1.014	0.685	0.557	1.055	1.095	0.314	1.29	0.59	0.59	1.06	1.123	1.809	1.859	1.929	1.782	0.688	0.412	0.734	0.862	0.59	0.59	0.437	0.481	0.354	0.997	0.61	0.756	0.718	0.589	1.029
941	504.0314677	394.0958833	396.1044008	160.0375633	2.008517512	6990.629032	1	1	0.57	0.415	0.707	0.427	0.886	0.588	0.528	0.36	0.668	0.463	0.735	0.425	0.927	0.673	0.936	0.521	0.58	0.56	0.823	0.694	1.312	0.905	1.297	1.079	0.94	0.898	0.761	0.592	9.99	9.99	0.629	1.59	0.621	2.05	0.863	0.929	0.33	6.49	0.941	1.4	0.619
942	504.0682466	567.1900052	569.1964534	333.1316852	2.006448247	3658.712329	1	1	0.58	0.656	0.715	0.655	0.665	0.608	0.347	0.374	0.482	0.448	0.753	0.663	0.637	0.776	0.829	0.844	0.628	0.651	0.692	0.808	0.691	0.715	0.744	0.627	0.622	0.78	0.722	0.747	0.487	0.56	0.522	0.385	0.518	0.455	0.443	0.475	0.772	0.79	0.802	0.858	0.564
943	504.3174019	398.0669716	400.0739004	164.0086516	2.006928784	5720.82243	1	1	0.621	0.63	0.847	0.615	0.792	0.594	0.506	0.45	0.558	0.542	0.764	0.692	0.823	0.875	0.907	0.647382786	0.578	0.668	0.685	0.672878594	1.178	0.968	1.234	1.046	0.917	0.751	0.74	0.715	2.043	2.748	0.644	0.264	0.667	0.901	0.613	0.756	0.531	0.427	0.958	0.862	0.641
944	504.703375	446.1742747	448.1807495	212.1159547	2.00647477	4548.428571	1	1	0.383	0.352	0.496	0.369	0.516	0.514	0.264	0.233	0.385	0.401	0.672	0.511	0.631	0.504	0.413	0.209	0.951	0.218	0.609	0.521	0.242	0.164066487	0.61	0.568	1.541	1.007	0.248	0.151	0.785	0.767	0.52	0.274	0.862	0.693	0.828	0.593	0.363	0.424	0.641	0.592	3.54
945	504.7224914	351.1003715	353.1072257	117.0420515	2.006854197	7931.637931	1	1	0.982	1.334	0.678	0.639	0.865	1.457	0.881	1.214	0.825	0.801	0.579	0.694	0.967	1.83	0.687	0.991	0.58	0.879	0.719	1.201	0.636	0.959	1.016	1.291	0.664	1.317	0.619	0.817	0.49	0.728	1.207	1.537	1.344	1.343	0.867	0.626	0.567	0.481	0.76	0.628	0.441
946	504.7785714	410.0895507	412.0962822	176.0312307	2.006731493	3222.571429	1	1	0.756	0.533	0.707	0.558	1.006	0.57	0.82	0.766	1.01	0.968	0.782	0.86	1.363	1.195	0.992	0.708	0.657	0.938	0.921	0.751	0.958	0.768	1.664	1.337	1.353	1.215	0.841	1.219	1.694	1.231	0.625	0.731	0.962	0.954	0.892	0.685	0.93	0.774	0.905	0.772	0.789
947	504.7835	317.1314308	319.1381856	83.0731108	2.006754779	5756	1	1	0.932	0.816	0.976	0.82	0.945	0.845	0.931	0.793	0.956	0.819	0.977	0.92	1.009	0.835	0.985	0.839	0.932	0.817	0.963	0.77	0.945	0.839	0.935	0.827	0.938	0.854	0.955	0.856	0.872	0.852	0.888	0.825	0.863	0.829	0.872	0.893	0.862	0.89	0.836	0.813	0.881
948	504.789	571.1857257	573.1915912	337.1274057	2.005865503	2610	1	1	0.728576263	1.02744677	0.756888931	0.11	1.115181787	0.11	0.786891511	0.11	1.373	0.11	0.399	0.11	1.622	0.11	0.640831571	0.12	0.716	0.12	0.773978652	0.11	0.447	0.12	0.293	0.11	0.975460095	0.12	0.477028431	0.11	0.641083618	0.558	1.072278909	0.441	1.294	1.407	1.041	0.69137279	0.718	1.464	0.714	1.341	1.8
949	505.04775	390.1116448	392.118156	156.0533248	2.006511173	7549.84375	1	1	1.032	1.382	0.793	0.617	0.751	0.758045114	0.617	0.476709516	0.865	2.511	0.701	1.944245013	0.682	0.935166072	0.948	0.69	1.866	2.409	1.246	0.69	0.545	0.77	0.699	1.020090504	0.938	1.191	0.695	0.69	1.131	0.594	0.611	0.28	0.75	0.69	0.53	1.448	1.374	1.44	0.483	0.808	0.628
950	505.1095385	376.0848789	378.0938407	142.0265589	2.008961726	8121.846154	1	1	0.2	0.704	2.96	0.747	1.145869252	0.531	0.2	0.505	0.799417926	0.416	1.027	0.353	0.954	0.918	0.95	0.571	0.798346103	0.611	0.859546045	0.2	1.128469399	0.887	1.334321669	1.03	1.2	0.584	0.977	0.823	1.86736377	2.660138216	0.686	0.2	3.32	0.723	0.602	1.195	0.2	0.499	0.2	0.771	0.911571638
951	505.3335	380.1132994	382.1211451	146.0549794	2.007845665	3029	1	1	1.19	1.966	0.895	1.338	1.764279795	1.269	1.085121412	0.557	0.98	0.979	1.367921553	1.307	1.066	1.071	1.128056841	1.233	1.001	1.288	1.011	1.211	1.847	1.562	0.91	1.136	1.31930539	1.578	1.347	1.256	0.719511251	0.66029749	0.773	1.545	1.438	1.468	1.703	0.993	1.101	0.765	1.643	1.72	1.112
952	505.3624605	474.132441	476.1391367	240.074121	2.006695694	6381.815789	1	1	1.064	1.037	0.809	0.868	1.164	0.956	0.949	0.774	1.003	1.008	0.996	0.802	1.319	1.129	1.174	0.97	1.124	0.675	1.044	0.988	1.415	1.318	1.148	0.989	1.177	1.119	1.365	1.209	0.922	0.834	0.966	0.857	0.8	0.819	0.919	1.084	0.992	0.829	1.219	1.015	1.058
953	506.844	385.0829033	387.0898105	151.0245833	2.006907168	16436	1	1	0.959	0.891103841	0.678	0.675	0.69	0.718	0.488	0.412186315	0.709	0.661700448	0.638	0.935	0.69	0.762285357	0.614	0.631121909	0.222	0.849	0.76	0.761825072	0.53	0.670276898	0.711	0.583072343	0.578	0.749	0.736	0.752	0.704	0.742	0.614	1.209	0.746	0.727	0.695	0.601	0.262	0.274	0.208	0.227	0.222
954	507.3788931	528.1793541	530.185847	294.1210341	2.006492834	25231.74843	1	1	0.699	0.961	0.835	0.818	0.535	0.474	0.536	0.361	0.684	0.597	0.642	0.621	0.794	0.624	0.579	0.667	0.493	0.684	0.792	0.737	0.418	0.506	0.474	0.555	0.834	0.609	0.476	0.535	0.636	0.686	0.52	0.34	0.814	0.915	0.785	0.593	0.388	0.434	0.37	0.336	0.439
955	508.1845953	323.105447	325.1122078	89.04712696	2.006760808	251060.5674	1	1	0.821	1.025	0.602	0.586	0.563	0.45	0.761	0.714	0.658	0.638	0.856	1.036	0.678	0.567	0.951	0.802	0.665	0.788	0.834	1.043	1.84	3.121	1.782	2.994	0.576	0.526	0.823	0.903	0.588	0.649	0.638	0.454	0.59	0.594	0.564	0.742	0.576	0.575	0.583	0.552	0.75
956	509.0195256	363.1004539	365.1071	129.0421339	2.006646084	5244276.847	1	1	0.903	0.887	0.707	0.618	0.763	0.7	0.459	0.398	0.683	0.635	0.636	0.631	0.733	0.727	0.651	0.581	0.214	0.609	0.773	0.761	0.583	0.595	0.751	0.584	0.649	0.692	0.797	0.811	0.744	0.755	0.662	1.258	0.688	0.711	0.734	0.645	0.251	0.267	0.22	0.22	0.199
957	511.2347	452.1847102	454.1911667	218.1263902	2.006456416	15320.2	1	1	0.793	0.979	2.028	2.372	0.478	0.52	0.801	0.814	0.713	0.585	0.825	0.723	0.875	0.985	0.681	0.741	0.405	1.044	0.59	0.775	0.445	0.435	0.235	0.254	1.744	2.002	0.281	0.247	0.456	0.521	0.3	0.19	0.535	0.564	0.628	0.705	0.311	0.311	0.823	0.908	0.241
959	513.6289536	321.1263309	323.132915	87.06801094	2.006584036	155421.2423	1	1	0.893	0.965	0.844	0.726	0.958	1.012	0.964	0.85	1.026	0.86	0.682	0.593	0.747	0.767	0.768	0.83	0.554	0.685	1.054	1.065	1.041	0.969	0.836	0.768	0.54	0.726	0.683	0.868	0.411	0.532	0.713	1.057	1.024	1.041	0.862	0.834	0.48	0.471	0.522	0.502	0.443
960	514.2917163	396.110693	398.1172214	162.052373	2.006528416	122757.1256	1	1	0.581	0.462	0.621	0.388	0.696	0.521	0.62	0.402	0.632	0.492	0.653	0.456	0.803	0.716	0.705	0.586	0.714	0.685	0.716	0.662	0.992	0.772	1.025	0.917	0.818	0.809	0.692	0.814	2.499	2.378	0.663	0.81	0.581	0.552	0.563	0.685	0.592	0.6	0.803	0.879	0.613
961	515.068	349.0819156	351.091993	115.0235956	2.010077325	2198	1	1	1.093	0.775	1.289	0.81	0.962	1.621	0.91	1.12	0.857	0.805	0.866	0.888	1.588	0.81	0.875	0.514	1.203	1.43298477	0.698	0.878	0.793	0.883	0.996	0.835	0.991	0.867	0.865	1.306	0.958	1.385	0.968	3.797	0.858	0.979	0.878	1.08	1.668	1.02	1.118	0.92	0.759
962	515.1986667	392.0797487	394.0855542	158.0214287	2.005805539	3225.333333	1	1	0.298	0.301	1.013	0.837	0.893	0.938	1.027	1.042	0.662	0.86	0.653	0.655000981	0.99	0.824	0.576	0.719	0.599	0.738	0.728	1.098	0.455	0.591	0.62	0.601	0.998	1.019	1.232	1.451	0.567	0.676	0.798	0.376	1.045	0.935	0.984	0.463	0.539	0.608	0.621	0.563	0.415
963	515.513	292.0993708	294.1055966	58.04105076	2.006225818	3557	1	1	0.522	0.68	0.535	0.615	0.693	0.651	0.587	0.627	0.692	0.597	0.65	0.679	0.782	0.856	0.707	0.694	0.693	0.768	0.506	0.759	0.733	0.799	0.707	0.621	0.683	0.724	0.682	0.698	0.464	0.547	0.566	0.769	0.497	0.543	0.579	0.727	0.453	0.538	0.479	0.673	0.353
964	517.8331923	456.15882	458.1652695	222.1005	2.006449489	4108.115385	1	1	0.388	0.609	0.674	0.549	0.458	0.442	0.548	0.421	0.427	0.361	0.282	0.267	0.46	0.389	0.426	0.39	1.31	0.424	0.329	0.416	0.246	0.306	0.303	0.288	0.376	0.47	0.491	0.503	0.293	0.425	0.58	0.429	0.554	0.569	0.462	0.416	0.789	0.773	0.96	0.972	1.816
968	518.9159137	480.1793625	482.1856462	246.1210425	2.006283766	5646.748201	1	1	0.354	0.427	0.461	0.529	0.929	0.857	0.662	0.54	0.623	0.548	0.533	0.406	0.932	0.925	0.26	0.289	0.387	0.469	0.669	0.668	0.318	0.264	0.387	0.371	0.534	0.675	0.691	0.845	0.388	0.541	0.463	0.195	1.122	1.126	1.004	0.382	0.201	0.195	0.227	0.294	0.298
970	519.9121818	415.0942905	417.1016253	181.0359705	2.007334859	3722.954545	1	1	0.901	1.24	1.443	1.16	0.978	0.802	2.157	2.215	1.769	1.689	1.306	1.259	1.29	1.335	1.106	0.979	0.705	1.406	0.741	0.8	2.616	2.801	2.698	2.652	1.197	1.262	1.011	1.166	1.009	1.228	1.2	0.769	2.159	2.257	1.798	0.875	1.86	2.08	2.267	3.09	1.651
973	521.0813333	381.1299553	383.136541	294.1432705	2.006585756	4925.333333	2	2	1.823	1.27	2.404	3.021	4.238	1.002	0.746	0.792	0.823	2.463	2.788	1.994	3.41	0.94	3.481	1.327	0.554	1.125	0.868	1.106	2.492	1.894	1.756	1.561	2.987	0.887	3.786	3.184	5.131	4.069	0.776	1.001	1.615	1.411	3.947	4.349	0.381	0.356	0.552	0.464	0.336
974	521.1236733	424.0515355	426.057902	189.9932155	2.00636654	29552.20792	1	1	0.439	0.451	0.337	0.34	0.452	0.362	1.141	1.022	1.018	0.938	0.918	0.749	0.824	0.642	0.469	0.395	0.648	0.772	2.553	2.61	0.685	0.578	1.753	1.561	0.772	0.748	3.207	3.08	0.1	0.104	0.537	0.549	0.1	0.1	0.1	1.386	0.365	0.381	0.534	0.538	0.851
976	521.6818376	396.134829	398.141487	324.153018	2.006658035	16955.41117	2	2	0.514	0.57	0.591	0.533	0.637	0.7	0.497	0.517	0.627	0.499	0.384	0.423	0.502	0.714	0.59	0.686	0.648	0.826	0.565	0.646	0.973	0.852	0.666	0.69	0.553	0.934	0.52	0.602	0.539	0.612	0.494	0.269	0.732	0.677	0.5	0.394	0.579	0.556	0.6	0.538	0.567
978	521.75	457.0634759	459.0699128	446.0103118	2.006436854	2414	2	2	0.605	0.826	0.568	0.719	0.545	0.669	0.537	0.543	0.499	0.563	0.53	0.672	0.973	0.646	0.58	0.537	0.741	0.733	0.809	0.785	0.695	0.725	0.724	0.813	0.577	0.608	0.716	0.739	0.567	0.541	0.406	0.489	0.572	0.752668084	0.6	0.582	0.511	0.931315518	0.528	0.76345564	0.541
979	522.0608804	600.2003566	602.2061194	366.1420366	2.005762785	3483.086957	1	1	1.918	0.498	1.554	2.411	2.307	0.284	0.367	0.418	0.318	1.91	3.555	2.688	3.867	0.608	3.164	0.616	0.484	0.374	0.438	0.518	1.511	0.867	3.65	0.74	3.886	0.576	4.24	3.9	4.39	3.339	0.297	0.312	0.525	0.565	2.662	3.721	0.281	0.317	0.376	0.317	0.391
980	522.238	381.1302298	383.1367525	147.0719098	2.006522714	3936	1	1	1.823	1.265	2.352	3.021	3.764	1.002	0.746	0.754	0.923	2.827	2.788	1.994	3.384	0.928	3.418	1.321	0.557	1.125	0.874	0.934	2.543	1.77	1.756	1.561	3.029	0.887	3.833	3.261	5.017	3.845	0.792	0.933	1.615	1.411	4	4.349	0.381	0.356	0.552	0.488	0.343
982	522.2756	396.6358425	398.6432061	325.1550451	2.007363594	4488.4	2	2	0.533	0.568	0.674	0.565	0.712	0.868	0.574	0.573	0.63	0.525	0.464	0.437	0.479	0.8	0.585	0.834	0.667	0.847	0.58	0.638	1.019	1.127	0.765	0.748	0.699	0.851	0.654	0.724	0.616	0.785	0.538	0.25	0.818	0.876	0.641	0.449	0.549	0.645	0.697	0.797	0.573
986	523.286	396.6338992	398.6397374	162.5755792	2.005838115	4844	1	1	0.510437206	0.571	0.686825846	0.656	0.27	0.857	0.625575667	0.562	0.651643018	0.525	0.463873549	0.455	0.341	0.815	0.574374474	0.71	0.838741477	0.83	0.547236691	0.765	1.068925105	0.998	0.832	0.741	0.742972223	0.89	0.673373574	0.674	0.645	0.730227806	0.642456071	0.272430778	0.818026272	0.809244544	0.639708252	0.488524228	0.589502189	0.645150248	0.652	0.692272818	0.567264931
987	523.308	379.1691942	381.1755445	145.1108742	2.006350331	5044	1	1	0.743	1.217	0.863	1.277	0.801	0.844	0.627	0.808	0.757	0.791	0.814	0.777	0.822	1.042	1.231	1.571	0.867	0.909	1.043	1.2	1.331	1.841	1.237	1.289	0.858	1.253	1.158	1.505	0.406	0.421	1.226	1.694	0.69	0.667	0.715	0.539	0.821	0.825	1.1	1.059	0.872
989	524.5014095	422.1739362	424.1806211	188.1156162	2.00668492	21779.52381	1	1	0.794	0.982	1.403	1.411	0.578	0.595	0.672	0.571	0.368	0.279	0.521	0.373	0.819	0.855	0.435	0.341	0.485	0.412	0.603	0.652	0.331	0.294	0.398	0.271	0.669	0.761	0.277	0.305	0.844	0.783	0.469	0.363	0.898	0.949	0.646	0.577	0.241	0.23	0.522	0.571	0.495
990	525.1798	440.1008778	442.1073182	206.0425578	2.00644038	6361.6	1	1	0.482	0.232	0.431	0.176	0.398	0.295	0.387	0.31	0.308	0.466	0.345	0.335	0.453	0.361	0.381	0.367	0.304	0.331	0.345	0.337	0.702	0.656	0.745	0.408	0.388	0.491	0.479	0.379	1.252	1.021	0.371	1.573	0.182	0.282	0.414	0.442	0.276	0.342	0.399	0.405	0.252
993	525.60225	581.2274249	583.23459	347.1691049	2.007165135	2544.5	1	1	0.935	0.949	0.742	0.675	0.989	1.003	1.002	0.835	0.984	0.903	0.756	0.615	0.745	0.807	0.723	0.744	0.604	0.653	0.878	1.024	1.166	1.067	0.855	0.784	0.586	0.715	0.81	0.815	0.45	0.536	0.707	0.977	1.136	0.939	0.832	0.8	0.704	0.553	0.702	0.536	0.528
995	526.3477547	481.1271406	483.1335922	247.0688206	2.006451655	9391.830189	1	1	0.611	0.359	0.631	0.332	0.725	0.555	0.736	0.498	0.711	0.57	0.637	0.529	0.835	0.715	0.769	0.621	0.671	0.692	0.688	0.666	0.957	0.736	1.039	0.811	0.799	0.772	0.708	0.849	2.389	2.274	0.688	0.783	0.54	0.567	0.646	0.732	0.639	0.658	0.851	0.866	0.534
998	527.228	447.0996258	449.1064455	426.0826117	2.006819646	2794	2	2	0.202	0.742	0.469510582	0.735	0.951110272	1.18	0.224	0.583	0.206	0.614	0.214	0.744	0.375	0.753	0.632261618	1.114	1.138	1.274	0.765778193	1.172	0.279	1.034	0.723	1.446	0.283	0.685	0.301	1.125	0.373	0.376	0.279	0.427	0.567	0.438	0.3	0.426	1.346	1.166	1.724	0.871	1.241
1000	528.446	447.1021507	449.1088949	213.0438307	2.006744131	2420	1	1	0.492	0.264	0.667	0.416	1.012	0.299	0.455	0.298	0.522	0.226	0.747	0.262	0.629	0.331	0.886	0.364	1.572	0.572	0.755	0.338	0.66	0.345	0.89	0.89	0.724	0.457	0.825	0.269	0.539	0.646	0.861	0.82	0.686	0.584	0.442	0.89	1.452	1.538	1.973	1.609	1.571
1002	530.9818118	310.0740353	312.0806144	76.01571531	2.006579093	10104.37647	1	1	0.585	0.638	0.743	0.765	0.597	0.589	0.671	0.656	1.063	0.652	0.768	0.693	0.663	0.728	0.719	0.779	0.626	0.772	0.624	0.72	0.9	0.922	0.82	0.698	0.781	0.965	0.814	0.858	0.91	1.014	0.73	0.906	0.577	0.567	0.595	0.757	0.989	0.864	0.777	0.791	0.635
1003	531.5307619	405.1163205	407.1229419	342.1160009	2.006621447	2762.380952	2	2	0.347	0.493	0.12	0.268	9.99	9.99	0.336	0.348	0.673	0.553	0.267	0.317	0.508	0.508	0.277	0.12	0.604	0.397	0.342	0.299437267	0.936	0.802	0.859	0.835	0.354	0.321	0.361	0.429	0.486	0.645	0.196	0.233	0.277	0.354	0.421	0.414	0.12	0.12	0.238	0.12	0.12
1005	532.3311429	520.1268516	522.1330874	286.0685316	2.006235822	5449.571429	1	1	0.745	0.673	0.562	0.361	0.264	0.448	1.367	2	1.259	0.686	1.799	0.992	0.566	0.575	0.262	0.344	0.592	0.356	0.405	0.506	0.831	0.88	0.677	0.526	1.397	1.566	0.728	0.931	0.17	0.39	0.17	0.17	2.152	2.285	2.414	0.318	0.17	0.17	0.351	0.17	1.036
1006	532.505	400.156608	402.160762	166.098288	2.004154069	2648	1	1	5.722	3.466	9.319	1.347	4.580705204	0.903	4.156	0.413	5.655	1.103	5.446	0.941	4.964	2.917	2.748	1.161	7.467	1.136	5.078	1.332	4.684	2.433	4.511	1.129	7.45	2.468	2.815	1.855	5.601	9.237	9.328	9.99	3.814	4.734	7.13	4.24	3.458	4.179	3.017	4.221	8.276
1010	533.107206	396.110592	398.1171123	162.052272	2.006520249	88081.83543	1	1	0.584	0.554	0.605	0.462	0.694	0.559	0.617	0.436	0.657	0.512	0.638	0.539	0.776	0.737	0.699	0.706	0.709	0.801	0.722	0.73	0.995	0.94	1.049	0.932	0.804	0.85	0.678	0.87	2.491	2.421	0.683	0.734	0.592	0.556	0.548	0.676	0.617	0.635	0.825	0.914	0.627
1012	533.519	529.1098483	533.1234102	62.00050832	4.013561839	4426	1	2	0.379	0.214	0.597	0.274	0.331	0.222	0.2	0.2	0.379	0.2	0.41	0.214	0.309	0.243	0.374	0.206	0.2	0.224	0.219	0.254395029	0.272	0.186	0.398	0.266	0.254	0.34	0.255	0.246	0.175	0.312	0.169	0.346	0.578	0.378	0.311	0.252	0.495	0.545	0.504	0.473	0.404
1013	533.601	452.077933	454.0840154	218.019613	2.006082406	2340	1	1	0.23	0.23	0.703	0.536	0.682	0.23	0.563	0.23	1.464	1.287	0.23	0.23	1.144	1	0.839	0.23	0.23	2.184	0.967	1.102645676	1.814	1.687	3.649	2.774	1.081	0.879	2.101	2.363	0.23	0.23	0.981	0.761	0.726	1.102645676	0.904	0.23	0.757	1.102645676	0.23	1.102645676	0.352
1014	533.9560227	436.1048144	438.1112832	202.0464944	2.006468867	6126.522727	1	1	0.129	0.153	0.715	0.643	0.525	0.446	0.51	0.452	1.576	1.495	0.299	0.305	1.453	1.192	0.72	0.497	0.467	3.176	1.06	0.968016575	1.836	2.123	4.049	3.169	1.19	0.906	2.45	2.646	0.11	0.11	1.109	0.773	0.736	0.968016575	0.708	0.153	0.588	0.968016575	0.217	0.968016575	0.391
1015	534.3387917	377.1160134	379.122707	143.0576934	2.006693585	4156.666667	1	1	1.101	1.091	0.479	0.449	0.476	0.558	0.587	0.602	0.675	0.705	0.771	0.717	0.429	0.459	0.797	0.701	0.607	0.633	0.706	0.695	0.624	0.543	0.635	0.475	0.427	0.49	0.641	0.59	0.789	0.687	0.767	1.899	0.319	0.268	0.344	0.624	0.599	0.618	0.579	0.647	0.606
1016	534.613	350.1153229	352.121372	232.1140058	2.006049073	1712	2	2	0.655	1.518	0.514	0.886	0.638740877	0.729	1.074	1.105	0.881	0.552	0.818	0.665	0.629	1.096	0.709	0.77	0.683491169	0.643	0.642	0.806	0.2	0.427	0.439	0.491	0.822	1.224	0.682	0.461	0.48	0.602	0.578	0.76	0.97	1.06	1.016	0.483	0.969	1.315	0.656	0.702	0.387
1017	534.989875	414.1230045	416.1294449	180.0646845	2.006440394	2980.25	1	1	1.31	0.69	0.854	0.549	0.781	0.691440636	0.419	0.493	1.47	1.356	0.739	0.69	1.353	1.114	0.919	0.81246673	1.019	0.582	1.047	1.74	1.747	1.415	3.153	2.763	0.952	0.977	2.469	1.543	0.926632493	1.383	0.947	0.682	0.725	2.01	0.717	0.760064575	0.618	1.556	0.69	0.69	0.353
1018	535.0093571	398.1523259	400.1594114	164.0940059	2.007085419	8637.516484	1	1	1.183	0.978	1.113	0.753	0.953	0.68	0.926	0.528	1.338	0.744	0.916	0.637	1.36	0.621	1.359	0.697	0.551	0.626	1.118	0.886	0.424	1.321050816	0.502	0.186	1.041	1.213	0.711	0.687	1.317	0.704	0.694	1.543	0.975	0.651	0.882	0.609	0.488	0.531	0.833	0.962	0.427
1019	535.5456667	400.1096945	402.1135884	166.0513745	2.003893899	2994	1	1	1.698468672	3.058769056	1.034	2.967	1.786184261	9.95	1.477	1.986	1.801198591	5.664481462	1.67377692	4.152	1.457420425	5.694	1.955914581	5.485	1.469	5.977	2.084	8.64	2.745885799	7.239	1.998	5.358	1.82	4.191656762	1.642	5.805	2.052762218	0.48	1.65599866	2.13254237	2.056540909	2.058810464	2.171753739	1.719793731	1.268	0.98	1.573277531	1.36	1.855070845
1021	537.704	296.094984	298.1014229	62.03666395	2.006438933	15348	1	1	0.648	1.558	0.639	0.965	0.808	2.006	0.552	1.274	0.609	0.612	0.628	0.564	0.65	2.187	0.65	2.281	0.659	2.137	0.527	1.43	1.058	2.462	1.201	2.093	0.919	2.02	0.598	0.886	0.631	2.605	0.443	1.842	1.769	1.719	0.592	0.601	0.593	0.646	0.606	0.607	0.406
1023	538.2521597	470.1378596	472.1444345	236.0795396	2.006574947	20488.23611	1	1	0.814	0.894	0.543	0.499	0.277	0.341	0.43	0.358	0.314	0.429	0.285	0.398	0.498	0.324	0.458	0.433	0.496	0.329	0.473	0.343	0.502	0.509	0.509	0.517	0.469	0.646	0.412	0.54	0.248	0.284	0.422	0.262	0.76	0.755	0.54	0.37	0.667	0.646	0.89	0.938	0.78
1026	541.9533333	339.1364758	341.143263	105.0781558	2.006787175	32550.83333	1	1	0.872	0.965	0.82	0.753	0.984	1.005	0.981	0.846	0.987	0.84	0.677	0.586	0.739	0.806	0.783	0.83	0.577	0.684	1.022	1.022	1.054	0.97	0.839	0.739	0.581	0.726	0.683	0.826	0.445	0.556	0.754	1.1	1.023	0.988	0.865	0.872	0.508	0.482	0.547	0.509	0.44
1027	542.6185652	447.1023003	449.1088351	426.0879606	2.006534782	19231.39098	2	2	0.492	1.043	0.748	0.898	1.225	1.58	0.493	0.689	0.522	0.614	0.948	0.964	0.629	1.048	0.886	1.466	1.574	1.276	0.755	1.46	0.697	1.441	0.897	1.759	0.724	0.89	0.856	1.095	0.539	0.649	0.861	0.794	0.684	0.582	0.463	0.89	1.452	1.581	1.973	1.841	1.594
1028	544.5336667	335.1415418	337.148269	101.0832218	2.006727242	4142.666667	1	1	0.759	0.92	0.905	0.903	1.034	0.829	1.107	0.903	0.948	0.915	0.845	0.756	0.875	0.87	0.846	0.874	0.922	0.803	0.859	0.856	0.95	0.919	0.951	0.809	0.919	0.929	0.781	0.853	0.737	0.798	0.828	1.04	0.855	0.89	0.787	0.809	0.657	0.695	0.893	0.953	0.678
1029	545.2253793	514.1637828	516.1702996	280.1054628	2.006516764	90220.54187	1	1	0.245	0.275	0.242	0.254	0.569	0.506	0.539	0.463	0.54	0.508	0.238	0.216	0.336	0.366	0.189	0.167	0.296	0.167	0.405	0.392	0.77809148	0.1001	0.14	0.121	0.542	0.584	0.511	0.523	0.264	0.291	0.33	0.145	0.34	0.325	0.329	0.519	0.985	1.014	0.431	0.432	0.155
1030	545.2964557	387.0867833	389.0927297	153.0284633	2.005946423	14730.35443	1	1	1.45	1.112	1.485	1.096	1.68	1.356	1.474	1.148	1.627	1.444	1.531	1.23	1.999	1.263	1.912	1.776	1.546	1.765	1.263	1.263	2.509	1.97	2.406	1.672	2.323	1.758	1.848	1.971	1.942	1.752	1.239	1.268	1.632	1.544	1.455	1.862	1.991	1.525	1.643	1.507	1.619
1033	546.6099737	362.1531892	364.159774	128.0948692	2.006584769	36347.1022	1	1	0.56	0.638	0.695	0.707	0.722	0.721	0.909	0.79	0.806	0.656	0.634	0.557959802	0.608	0.662	0.666	0.688	0.682	0.715	0.677	0.841939138	0.805	0.78	0.771	0.671	0.733	0.923	0.56	0.666	0.41	0.526	0.741	0.531	0.737	0.741	0.629	0.596	0.552	0.536	0.898	0.869	0.554
1042	547.7754683	362.1530301	364.1596609	128.0947101	2.006630795	64964.78824	1	1	0.56	0.639	0.695	0.721	0.722	0.721	0.909	0.798	0.806	0.656	0.634	0.614	0.608	0.661	0.666	0.664	0.682	0.665	0.677	0.655	0.805	0.767	0.771	0.671	0.733	0.918	0.56	0.666	0.41	0.526	0.741	0.531	0.737	0.741	0.629	0.596	0.552	0.536	0.898	0.869	0.554
1050	548.0463906	388.1373494	390.1439259	308.1580588	2.00657653	8345.402531	2	2	1.34	1.025	2.928	2.787	3.156	0.944	0.787	0.777	0.95	1.56	2.87	1.456	3.195	1.29	3.213	1.219	0.758	0.999	0.782	1.283	1.728	1.806	1.584	1.518	3.598	1.468	3.238	2.143	6.935	4	0.69	0.6	1.454	1.428	2.713	3.687	0.384	0.446	0.564	0.587	0.452
1052	548.3438	388.6393881	390.6458629	309.1621361	2.006474815	2944.8	2	2	1.587	0.988	2.556	3.543	3.534	0.941	0.873	0.74	0.851	2.355	2.514	1.303	3.613	1.335	3.159	1.677	0.904	1.45	0.718	1.795	1.757	1.651	1.649	1.785	3.628	1.471	3.044	2.307	5.807	4.092	0.834	0.566	1.699	1.846	3.022	3.141	0.446	0.381	0.664	0.696	0.534
1054	548.4465	457.5663774	459.5734846	447.0161147	2.007107191	3346	2	2	0.58	0.49	0.613	0.698	0.542	0.777	0.587	0.657	0.581	0.617	0.518	0.33	0.61	0.846	0.587	0.441	0.881	0.86	0.748	0.669989867	0.753	0.825	0.744	0.836	0.731	0.717	0.711	0.797	0.612	0.628	0.582	0.57	0.519	0.571	0.522	0.652	0.577	0.878399115	0.605	0.842838233	0.606
1057	548.8389481	381.1471089	383.1539401	147.0887889	2.006831253	30244.53774	1	1	0.591	0.65	1.323	1.279	0.59	0.487	0.695	0.612	0.626	0.563	0.885	0.865	1.203	1.222	0.699	0.62	1.025	0.794	0.958	0.928	1.148	1.065	0.998	0.887	0.973	1.055	0.496	0.516	0.642	0.774	0.3	0.171	0.556	0.564	0.523	1.47	1.036	1.05	1.146	1.214	0.713
1059	548.959	441.1519241	443.1576601	207.0936041	2.005735963	2144	1	1	0.37	0.394	0.546	0.37	1	0.827	0.501	0.474760914	0.706	0.506	0.896	0.458	0.825	0.754	0.697	0.693	0.37	0.48	1.037	0.731862813	0.37	0.37	0.37	0.37	1.265	1.383	0.948	1.025	0.568	0.661	0.963	0.671	0.952	1.001	0.878	0.6	0.261	0.614	0.467	0.37	0.37
1063	549.13475	457.065743	459.0720939	446.0148461	2.006350849	5773.5	2	2	0.561	0.826	0.54	0.583	0.508	0.505	0.515	0.517	0.522	0.501	0.484	0.523	0.654	0.594	0.565	0.543	0.802	0.523	0.707	0.755	0.686	0.838	0.712	0.79	0.642	0.72	0.648	0.622	0.56	0.552	0.464	0.52	0.489	0.516	0.524	0.557	0.494	0.612	0.562	0.764	0.559
1070	549.934	363.1003419	365.1074441	129.0420219	2.007102214	5084.666667	1	1	0.887	0.867	0.702	0.572	0.819	0.794	0.489	0.489	0.714	0.781	0.684	0.55	0.755	0.787	0.71	0.724	0.256	0.656	0.787	0.808	0.627	0.813	0.734	0.638	0.654	0.758	0.779	0.828	0.79	0.776	0.632	1.244	0.681	0.721	0.738	0.654	0.303	0.305	0.22	0.258	0.219
1072	549.969	406.1299845	408.1366454	172.0716645	2.006660901	3738	1	1	0.625	0.367	0.388	0.477	0.506	0.499250742	0.368	0.454	0.506	0.45563161	0.425	0.310682388	0.398	0.717	0.336	0.259	1.131	0.500749033	0.2	0.268907163	0.613	0.467	0.808	0.519	0.751	0.321	0.417	0.591	0.448	0.359	0.196	0.2	0.422	0.313	0.465	0.24	1.19	1.023	0.507	0.308	0.324
1073	549.992	457.0659387	459.073044	223.0076187	2.007105256	5592	1	1	0.536	0.826	0.539	0.625	0.514	0.514	0.519	0.501	0.522	0.4	0.48	0.545	0.671	0.558	0.573	0.756	0.782	0.523	0.703	0.726	0.663	0.788	0.723	0.776	0.655	0.683	0.664	0.62	0.557	0.543	0.468	0.533	0.484	0.621	0.534	0.553	0.492	0.584	0.541	0.835	0.553
1079	551.3552989	321.1263347	323.1329563	87.06801474	2.00662161	118191.6437	1	1	0.887	0.935	0.841	0.713	0.943	0.98	0.97	0.858	1.024	0.828	0.679	0.572	0.742	0.756	0.764	0.785	0.552	0.663	1.054	0.998	1.034	0.926	0.829	0.735	0.543	0.686	0.666	0.852	0.407	0.522	0.705	1.047	1.026	1.039	0.861	0.832	0.475	0.459	0.526	0.497	0.435
1080	555.8907037	349.5699363	351.5781046	115.5116163	2.008168243	1128790.148	1	1	0.667	0.812	0.782	0.772	0.745	0.63	0.648	0.588	0.711	0.712	0.982	0.886568524	0.904	0.792	0.743	0.57142631	0.673	0.537245339	0.883	0.957	0.816	0.785	0.67	0.59	0.567	0.518	0.498	0.577	0.686	0.726	0.377	0.32	1.282	1.165	1.372	0.694	0.589	0.589	0.422	0.506	0.482
1081	555.8957333	285.1595778	287.1662874	51.10125777	2.006709634	122849.2	1	1	0.822	0.836	0.786	0.766	0.776	0.595	0.624	0.617	0.736	0.727	1.047	0.868	0.862	0.78	0.741	0.662	0.753	0.644	0.881	0.93	0.824	0.764	0.645	0.588	0.559	0.551	0.504	0.564	0.634	0.7	0.46	0.38	1.279	1.299	1.312	0.63	0.581	0.511	0.498	0.497	0.493
1082	556.606869	349.1212504	351.1280562	115.0629304	2.00680582	17084296.9	1	1	0.751	0.792	0.823	0.745	0.819	0.608	0.639	0.577	0.7	0.697	0.97	0.99	0.888	0.765	0.756	0.72	0.758	0.71	0.895	0.97	0.817	0.86	0.644	0.559	0.573	0.549	0.53	0.555	0.684	0.703	0.451	0.378	1.159	1.175	1.257	0.746	0.605	0.679	0.511	0.496	0.482
1084	561.6380741	335.105192	337.1119309	101.046872	2.006738831	43641.92593	1	1	0.749	0.762	0.928	0.781	0.923	0.898	1.001	0.814	1.148	1.136	0.871	0.79	0.958	1.046	0.963	0.98	0.873	0.773	0.894	0.948	0.882	0.826	0.871	0.767	1.208	1.472	0.624	0.726	0.544	0.598	0.651	0.934	1.608	1.615	1.484	0.89	0.738	0.782	1.07	1.064	0.831
1090	563.847125	457.0651851	459.0717427	446.0137302	2.006557588	8328.25	2	2	0.536	0.612	0.526	0.604	0.536	0.53	0.513	0.497	0.538	0.532	0.458	0.538827803	0.636	0.657	0.564	0.546	0.817	0.678	0.692	0.672	0.675	0.795	0.717	0.775	0.66	0.655	0.635	0.68	0.555	0.549	0.483	0.546	0.469	0.486	0.502	0.557	0.492	0.639	0.582	0.774	0.566
1096	565.197	389.6437379	391.6505819	311.1708358	2.006844053	3968	2	2	0.746	0.541	2.331	2.223	1.334	0.989	1.112	1.015	0.693	0.693656218	0.674	0.682911182	1.713	2.59	0.61	0.729	0.938	0.545	1.214	1.090919895	0.37	0.5	0.638	0.5	2.261	2.037	0.433	0.783410155	0.949	0.924	0.425	0.5	1.705	0.66	1.306	1.644	0.58	1.090919895	0.341	1.090919895	1.213
1110	565.6874545	809.3174058	811.3240387	575.2590858	2.006632923	2960.181818	1	1	0.21	0.21	0.21	0.21	0.21	0.21	0.479	0.325	0.21	0.21	0.21	0.21	0.21	0.21	0.21	0.21	1.076	0.21	0.21	0.21	0.21	0.21	0.21	0.21	0.21	0.21	0.21	0.21	0.21	0.21	0.21	0.21	0.21	0.21	0.21	0.21	1.475	1.328	1.289	1.334	1.284
1120	566.422	450.1554903	452.162275	216.0971703	2.00678463	5442	1	1	0.403	0.197	0.231	0.222	0.307	0.164	0.229	0.264	0.345	0.246	0.202	0.212529495	0.326	0.299	0.215	0.232674824	0.482	0.335	0.15	0.188510991	0.344	0.271	0.546	0.234	0.431	0.201	0.163	0.381	0.277	0.255	0.228	0.142	0.26	0.281	0.381	0.202	0.639	0.661	0.251	0.249	0.214
1125	567.374	366.1011037	368.1063215	132.0427837	2.005217842	3178	1	1	0.561	0.481	2.315	1.469	0.9	0.742	2.245	2.183	0.608	0.565	0.769	0.706	0.594	0.74	0.639	0.51	2.036	0.847	0.611	0.379	1.193	0.998	0.865	0.72	0.661	0.75	0.836	0.642	0.836	0.912	0.657	0.493	0.432	0.91	0.75	0.519	1.645	1.33	1.45	1.319	1.174
1128	567.402	381.6312882	383.6380236	295.1459365	2.006735383	1858	2	2	1.915	1.911	2.829	2.504	2.565	1.572	0.781	0.819	1.286	1.297	2.55	1.742	2.628	1.817	2.158	1.347	0.7	1.327	0.911	1.959	2.727	1.591	3.038	1.291	2.059	1.122	3.146	1.858	3.272	2.83	0.84	0.844	2.029	2.034	2.719	2.889	0.435	0.462	0.536	0.865	0.55
1129	567.4263333	428.1740304	430.1808201	194.1157104	2.006789704	3894	1	1	0.485	0.178722449	0.203	0.215	0.313	0.11	0.24	0.182	0.418	0.301894159	0.253	0.11	0.29	0.253	0.279	0.241	0.55	0.342	0.148	0.248998024	0.335	0.261465082	0.621	0.282	0.393	0.213	0.179	0.328	0.255	0.303	0.232	0.216	0.296	0.232	0.374	0.194	0.777	0.679	0.247	0.211	0.188
1134	567.7453333	788.8606437	790.8672721	554.8023237	2.006628476	13016	1	1	1.031	1.383	1.652	2.232	0.893	1.201	0.64	0.765	1.128	1.149	0.973	1.18	0.695	0.91	0.988	1.204	0.903	1.214	1.062	1.143	1.257	1.672	1.246	1.324	1.25	1.702	1.282	1.712	0.559	0.744	0.713	2.382	0.912	0.967	0.796	1.004	0.869	0.888	1.396	1.577	1.653
1136	567.9256438	381.1294202	383.1358237	294.1422003	2.006403524	4891.589041	2	2	1.911	1.771	2.375	2.109	2.504	1.143	0.74	0.91	1.105	1.519	2.009	1.142	2.407	1.602	2.053	1.428	0.734	1.201	0.802	1.938	2.214	1.775	2.64	1.53	2.116	1.065	2.798	1.838	3.281	2.896	0.849	0.875	1.521	1.611	2.364	3.459	0.617	0.627	0.403	0.675	0.441
1141	568.394	789.3639787	791.3709226	1110.611317	2.006943964	13650	2	2	1.004	1.543	1.874	2.635	0.897	1.324	0.683	0.838	1.149	1.214	1.133	1.33	0.838	1.005	1.055	1.287	0.956	1.508	1.186	1.439	1.343	1.781	1.444	1.246	1.22	2.01	1.658	1.835	0.575	0.776	0.912	3.043	1.026	0.973	0.884	1.1	1.041	1.018	1.54	1.413	1.834
1164	569.021	789.3641818	791.3706862	555.3058618	2.006504452	17248.8	1	1	1.004	1.543	1.874	2.635	0.897	1.324	0.683	0.838	1.149	1.214	1.133	1.33	0.838	1.005	1.055	1.469	0.956	1.511	1.186	1.439	1.389	1.944	1.444	1.246	1.265	1.994	1.658	1.709	0.575	0.776	0.912	3.043	1.026	0.973	0.86	1.1	1.041	1.009	1.54	1.413	1.834
1175	569.4646667	369.1105653	371.1172597	135.0522453	2.006694407	2334.666667	1	1	0.573	0.649	0.655	0.845	0.484	0.406	0.64	0.595	0.528	0.597	0.918	0.899	0.524	0.494	0.951	0.996	0.898	0.696	0.558	1.73	0.565	0.669	0.439	0.51	0.774	0.808	0.659	0.643	0.785	0.922	0.437	0.397	1.77	2.53	0.638	0.661	1.017	1.66	1.078	1.171	0.716
1183	570.0081402	436.1896633	438.1961782	202.1313433	2.006514863	35002.85981	1	1	0.425	0.564	0.855	0.911	0.374	0.326	0.637	0.539	0.278	0.221	0.338	0.275	0.489	0.543	0.294	0.267	1.773	0.303	0.391	0.395	0.29	0.253	0.141	0.151	0.53	0.642	0.174	0.219	0.365	0.422	0.302	0.206	0.683	0.676	0.441	0.485	1.781	1.827	3.403	3.799	1.85
1190	570.461	457.0656189	459.0717093	223.0072989	2.00609038	10288	1	1	0.54	0.579	0.539	0.599	0.536	0.53	0.504	0.478	0.534	0.518	0.456	0.552	0.628	0.657	0.553	0.577	0.819	0.664	0.69	0.768	0.669	0.823	0.711	0.729	0.671	0.691	0.634	0.681	0.556	0.548	0.504	0.548	0.471	0.468	0.494	0.552	0.494	0.639	0.589	0.779	0.566
1201	570.9210645	583.2215543	585.2277396	349.1632343	2.006185296	4373.612903	1	1	0.13	0.13	0.177	0.212	0.294	0.263	0.175	0.157	0.108	0.13	0.191	0.157	0.153	0.222	0.13	0.13	0.377	0.186	0.166	0.133	0.13	0.13	0.13	0.13	1.086	0.99	0.129	0.143	0.483	0.34	0.214	0.196	0.174	0.119	0.159	0.387	0.202	0.144	0.215	0.243	1.184
1202	571.0265	321.0890497	323.0978711	87.03072975	2.00882134	5865	1	1	0.212	0.307	0.385	0.244	0.1001	0.188	0.1001	0.105	0.1001	0.543	0.1001	0.918312299	0.1001	0.1001	0.1001	0.316	0.1001	0.773	0.1001	0.1	0.1001	0.913935791	0.1001	0.1001	0.1001	0.115	0.1001	0.1001	0.1001	0.1001	0.698240613	0.1	0.311	0.256	0.1001	0.1001	0.142	0.168	0.213	0.248	0.147
1203	571.1112143	694.2900024	696.2960709	460.2316824	2.00606857	2977.714286	1	1	0.2	0.2	0.212	0.2	0.291	0.362	0.495	0.457	0.365	0.2	0.2	0.2	0.395	0.302	0.2	0.2	1.048	0.2	0.2	0.2	0.2	0.2	0.2	0.2	0.2	0.43	0.2	0.2	0.411	0.272	0.2	0.2	0.26	0.291	0.375	0.2	1.262	1.117	1.587	1.511	1.671
1207	571.8830783	405.1474071	407.1538428	171.0890871	2.006435694	4795.471384	1	1	0.582	0.668	0.498	0.586	0.231	0.217	0.292	0.271	0.229	0.201	0.48	0.41	0.317	0.266	0.767	0.586	0.973	0.751	0.617	0.677	0.457	0.492	0.405	0.29	0.549	0.523	0.564	0.555	1.169	1.225	0.25	0.186	0.42	0.393	0.471	0.24	1.758	1.454	2.263	2.506	0.704
1220	573.0082529	454.142686	456.1491537	220.084366	2.006467691	5005.896552	1	1	0.71	0.714	0.673	0.588	0.743	0.679	0.503	0.411	0.595	0.55	0.665	0.521	0.811	0.785	0.713	0.592	0.726	0.51	0.528	0.609	0.933	0.707	0.891	0.7	0.918	0.77	0.778	0.972	0.644	0.654	0.62	0.676	0.691	0.645	0.728	0.548	0.781	0.707	0.789	0.777	0.686
1229	573.8585682	396.0774397	398.0823906	162.0191197	2.004950861	9146.568182	1	1	1.175	1.531	1.133	1.146	1.414	1.191	1.218	0.994	1.32	0.987	1.149	0.844	1.484	1.176	1.373	1.249	0.866	1.408	1.5	0.974	1.412	1.01	1.372	1.106	1.33	1.513	0.758	1.064	0.529	0.772	0.863	0.791	1.257	1.355	0.948	0.927	0.866	0.993	1.392	1.532	0.615
1233	574.4522	452.1751646	454.1777328	218.1168446	2.002568169	2548.8	1	1	0.699	1.525	0.525	1.314	0.485	0.807	0.416	0.709	0.561	0.933	0.473	0.833	0.613	0.703	0.626	1.155	0.405	1.009	0.415	0.667371004	0.382	0.944	0.71	1.445	0.853	1.218	0.741	1.292	0.621	0.621	0.677	0.581	0.336	0.334	0.253	0.528	0.69	0.725	0.794	0.77	0.931
1234	574.475	788.8626474	790.8699118	1109.608655	2.007264454	2352	2	2	1.031	1.576	1.652	2.927	0.912	1.17	0.64	0.825	1.128	1.128	0.973	1.203721436	0.695	0.926	1.008	0.878	0.853	1.141	1.062	1.288	1.246	1.42	1.246	1.333	1.225	1.511	1.282	1.514	0.566	0.746	0.713	2.358	0.912	0.967	0.828	1.004	0.869	0.888	1.446	1.597	1.63
1240	574.635	380.1155873	382.1236369	146.0572673	2.008049575	2526	1	1	1.304	1.249	1.266	1.506	1.943	1.403	0.889	0.802	1.001	0.95	1.744	1.49	1.235	1.396	1.476	1.486	1.304	1.115	1.308	1.376	1.987	1.652	1.595	1.34	1.906	1.9	1.505	1.472	0.171	0.292350607	0.668	0.784	1.891	1.625	1.737	1.445	1.146	1.249	1.959	1.902	1.704
1241	574.8233846	450.1681761	452.1750451	216.1098561	2.006868951	3015.692308	1	1	1.533	1.392	2.681	3.397	1.507	0.894	1.299	1.345	1.924	1.114	1.446	0.979	1.873	1.425	1.523	0.916	1.593	1.702	1.201	0.952	1.986	0.743	1.112	0.441	2.136	2.554	1.921	0.379	1.591	1.792	1.142	1.231	1.047	1.69	1.422	1.502	1.82	1.184	1.321	1.233	0.995
1243	575.0841279	321.1246354	323.1327174	87.06631539	2.008082049	6773.976744	1	1	0.962	1.089	0.906	0.836	0.999	1.078	1.043	0.964	1.044	0.978	0.748	0.76	0.823	0.815	0.865	0.908	0.676	0.81	1.095	1.136	1.098	0.993	0.889	0.828	0.683	0.777	0.718	0.934	0.558	0.64	0.834	1.036	1.085	1.067	0.942	0.874	0.596	0.537	0.633	0.547	0.491
1245	575.1292143	338.1048454	340.111957	104.0465254	2.007111657	3800.142857	1	1	0.665	0.817	0.646	0.564	0.956	0.641	0.8	0.668	0.916	0.731	0.817	0.958	1.012	0.869	0.998	0.807486796	1.132	0.795	1.055	1.229	1.08	0.814	1.071	0.866	0.849	1.135	1.064	1.208	1.55	1.379	0.927	0.86	0.722	0.791	0.696	0.828	0.692	0.667	0.997	1.107	0.666
1257	575.9494151	514.1637733	516.1702277	280.1054533	2.006454335	3181.54717	1	1	0.348	0.417	0.353	0.359	0.37	0.266	0.511	0.404	0.547	0.506	0.326	0.29	0.319	0.218	0.31	0.436	0.497	0.366	0.475	0.526	0.778	0.901	0.444	0.493	0.746	0.812	0.435	0.431	0.435	0.468	0.264	0.171	0.418	0.425	0.562	0.447	0.767	0.586	0.445	0.498	0.554
1261	576.144	431.2609389	433.266819	197.2026189	2.005880145	4049	1	1	3.06	1.619	2.396	2.024	2.358	1.921	3.2	1.77	2.394	2.761	3.424	2.421	2.836	1.338	3.419	1.524	2.895	2.977	1.884	1.643	5.142	2.675	5.163	2.544	4.204	3.172	3.464	3.274	1.649	1.998	2.535	1.545	2.292	1.48	3.17	2.022	2.94	1.03	3.95	1.15	2.412
1277	577.0217485	335.1419079	337.1485135	101.0835879	2.006605543	32288.0985	1	1	0.634	0.734	0.887	0.92	0.979	0.837	1.121	0.906	0.963	0.817	0.801	0.685	0.804	0.795	0.866	0.792	0.897	0.833	0.815	0.806	0.968	0.938	0.903	0.783	0.887	1.071	0.673	0.796	0.547	0.714	0.807	1.091	0.859	0.866	0.809	0.743	0.596	0.61	0.957	1.05	0.595
1283	577.289	392.0790272	394.0858858	158.0207072	2.00685861	3110	1	1	0.556	0.462	1.585	1.304	1.232	1.017	1.606	1.3	0.996	1.122	1.196	0.73	1.66	1.267	0.999	0.701244085	0.875	0.894709716	1.179	1.031722346	0.645	1.57	0.937	0.829	1.314	1.683	1.827	2.179	0.744	0.98	0.976	1.091	1.67	1.419	1.405	0.568	0.896	0.906	0.97	0.942	0.559
1286	577.612	431.7629599	433.7691952	395.4092797	2.006235335	2040	2	2	3.153	2.037	2.321	2.218	2.61	1.954	3.35	1.409	2.822	3.104574338	3.34	2.676911993	2.858	1.468	3.715	1.881411239	3.013	3.252745748	1.798	2.654895518	4.361	2.485	5.824	2.552	4.973	4.232	3.515	3.228	2.145	2.278	2.901	1.563	2.181	2.654895518	3.168	2.069	2.51	2.654895518	5.098	2.654895518	2.492
1298	577.946	448.1573134	450.165683	214.0989934	2.008369639	4193	1	1	1.085	1.256	1.974	1.496	2.254	1.558	0.801	0.71	1.351	0.755	2.414	1.202	1.332	1.25	2.428	2.235	1.475	1.536	1.459	1.344	1.308	0.778	1.156	0.924	1.74	1.316	2.849	2.159	1.79	1.941	1.187	1.111	1.636	1.625	1.883	1.773	1.342	1.523	1.58	0.992	1.624
1304	578.3133897	370.0963521	372.1027898	136.0380321	2.006437796	18880.16901	1	1	0.396	0.398	1.532	1.497	1.294	0.999	1.614	1.387	1.038	0.939	1.111	0.764	1.723	1.249	0.856	0.699	0.932	0.692	1.194	1.103	0.737	0.615	0.913	0.688	1.336	1.291	1.849	2.286	0.746	0.866	1.021	0.95	1.65	1.455	1.257	0.555	0.765	0.744	0.844	0.74	0.559
1305	578.3279318	671.7337852	673.7402992	437.6754652	2.006514072	22337.63636	1	1	0.58	0.858	1.233	1.347	1.07	1.034	0.423	0.53	0.892	0.789	1.129	1.136	0.793	0.733	1.145	1.208	0.747	1.154	0.766	1.135	0.612	0.745	0.519	0.615	1.095	1.165	1.524	1.397	0.833	0.889	0.6	0.583	0.916	0.84	0.947	1.066	0.731	0.766	0.914	0.919	0.911
1307	578.60975	457.065592	459.0722375	446.014544	2.006645514	9575	2	2	0.553	0.54	0.542	0.581	0.545	0.543	0.514	0.456	0.529	0.573	0.451	0.551	0.626	0.659	0.556	0.594213152	0.81	0.679663089	0.687	0.740567341	0.667	1	0.713	0.731	0.663	0.7	0.627	0.682	0.557	0.551	0.5	0.538	0.471	0.457	0.489	0.556	0.508	0.617	0.59	0.757	0.556
1308	578.643	418.5912576	420.5983719	184.5329376	2.007114282	14458	1	1	0.309	0.46	0.365	0.434	0.484	0.718	0.259	0.462	0.397	0.335	0.389	0.412	0.238	0.378	0.392	0.61	1.208	0.593	0.293	0.487	0.312	0.437	0.602	0.903	0.333	0.395	0.342	0.345	0.57	0.695	0.277	0.216	0.838	0.85	0.628	0.449	0.801	0.77	0.707	0.766	0.752
1313	578.9130449	672.235145	674.2416965	438.176825	2.006551456	13969.97753	1	1	0.535	0.991	1.186	1.409	1.313	1.136	0.488	0.545	0.915	0.821	1.326	1.206	0.797	0.85	1.221	1.381	0.904	1.274	0.792	1.338	0.673	0.759	0.579	0.606	1.137	1.171	1.508	1.705	0.809	0.934	0.656	0.646	0.935	0.962	0.998	1.181	0.75	0.842	0.97	0.951	0.968
1314	579.204	457.0620774	459.0691343	446.0075149	2.007056818	10431	2	2	0.53	0.586	0.53	0.608	0.534	0.541	0.5	0.485	0.542	0.522	0.47	0.539	0.636	0.632	0.549	0.587	0.878	0.683	0.672	0.711	0.717	0.751	0.709	0.749	0.686	0.686	0.601	0.664	0.554	0.541	0.499	0.523	0.461	0.446	0.495	0.545	0.521	0.683	0.595	0.443	0.542
1316	579.227	431.2610989	433.2672011	394.4055577	2.00610224	4160	2	2	3.166	1.554	2.396	1.98	2.394	1.924	3.2	2.111	2.394	2.314	3.424	3.013	2.836	1.461	3.419	1.763	3.012	2.729	1.943	1.643	4.982	2.474	5.034	2.943	4.204	3.037	3.464	3.35	1.627	2.005	2.66	1.509	2.292	1.48	3.053	2.022	2.66	1.03	3.95	1.15	2.412
1320	579.679	470.1745297	472.1816766	236.1162097	2.007146906	2684	1	1	0.626	0.848	0.721	0.62	0.716	0.689	0.784	0.514	0.512	0.667	0.459	0.392	0.626	0.664	0.529	0.494	0.51	0.54468526	0.667	0.729	0.562	0.44	0.573	0.527	0.556	0.541	0.648	0.84	0.597	0.689	0.507	0.501	0.597	0.592	0.536	0.548	0.481	0.458	0.979	0.814	0.741
1323	579.697	672.2350715	674.2414625	876.353503	2.006390952	5638	2	2	0.535	0.972	1.186	1.383	1.313	1.172	0.488	0.545	0.915	0.821	1.326	1.224	0.797	0.817	1.221	1.352	0.938	1.264	0.792	1.231	0.673	0.751	0.579	0.6	1.137	1.26	1.508	1.68	0.809	0.94	0.656	0.646	0.935	0.962	0.998	1.181	0.75	0.842	0.983	0.951	0.968
1326	579.733	419.0930805	421.0995758	185.0347605	2.006495345	5913.6	1	1	0.275	0.665	0.385	0.549	0.66	0.778	0.34	0.458	0.359	0.409	0.453	0.436	0.279	0.508	0.452	0.651	1.23	0.648	0.336	0.679	0.321	0.454	0.707	0.929	0.405	0.505	0.432	0.464	0.595	0.691	0.284	0.247	0.916	0.876	0.691	0.559	0.898	0.946	0.792	0.916	0.845
1336	580.2481818	457.5634596	459.5702756	223.5051396	2.006816025	5039.363636	1	1	0.532	0.641	0.651	0.687	0.594	0.566	0.6	0.54	0.472	0.551	0.549	0.575	0.618	0.763	0.535	0.677	0.932	0.782	0.65	0.759	0.808	0.802	0.768	0.737	0.769	0.753	0.663	0.696	0.564	0.639	0.587	0.55	0.497	0.499	0.487	0.654	0.584	0.878	0.571	0.843	0.584
1337	580.2546375	418.5914976	420.5981377	369.0663552	2.006640132	18352.1375	2	2	0.309	0.46	0.365	0.443	0.484	0.707	0.259	0.447	0.397	0.341	0.389	0.397	0.238	0.395	0.392	0.628	1.208	0.602	0.293	0.583	0.312	0.414	0.602	0.903	0.333	0.384	0.342	0.376	0.57	0.695	0.277	0.216	0.838	0.85	0.628	0.449	0.801	0.77	0.707	0.766	0.752
1341	580.53467	419.5913113	421.5976983	371.0659826	2.006387052	4238.32	2	2	0.392	0.527	0.371	0.57	0.66	0.802	0.355	0.531	0.543	0.392	0.476	0.49	0.281	0.447	0.523	0.759	1.256	0.648	0.282	0.525	0.3	0.492	0.719	0.918	0.391	0.488	0.495	0.395	0.655	0.767	0.504	0.315	0.893	0.813	0.84	0.555	0.814	0.961	0.803	0.874	1.059
1345	580.734	498.0522866	500.0557572	263.9939666	2.003470571	2448	1	1	0.31	0.31	0.31	0.31	0.31	0.31	0.518	0.342	0.31	0.31	0.486	0.502	0.886	0.806	0.31	0.31	0.31	2.014	1.199	0.96	0.31	0.31	0.444	0.328	0.31	0.31	1.22	1.212	0.31	0.31	0.31	0.31	0.31	0.31	0.31	1.141	0.31	0.31	0.31	0.31	0.445
1360	581.8994167	434.1740529	436.181507	200.1157329	2.00745402	3324.166667	1	1	0.708	0.563	0.65	0.507	0.69	0.508	1.022	0.876	0.948	0.784035703	1.1	0.9	0.731	0.555	0.75	0.735	0.859	0.786832381	0.88	0.94	1.092	0.767	0.693	0.724	0.654	0.662	1.027	1.232	0.568	0.512	1.005	0.649	1.211	0.962	0.959	1.185	0.561	0.484	0.433	0.518	0.741
1368	583.6451742	432.1946939	434.2013572	198.1363739	2.006663273	4034.877419	1	1	0.604	0.497	0.854	0.554	0.817	0.69	0.918	0.764	0.688	0.843	0.976	0.946	0.737	0.659	0.692	0.59	0.816	0.473	0.753	0.798	0.791	0.567	0.535	0.376	0.522	0.536	0.495	0.484	0.604	0.622	0.563	0.747	1.339	1.305	1.363	0.698	0.508	0.496	0.595	0.531	0.491
1378	584.2915	484.1539877	486.1603831	250.0956677	2.006395429	2653	1	1	0.552	0.431	0.89	1.148	0.599	0.471	0.941	0.653	0.484	0.746	0.413	0.37	0.558	0.444543494	0.61	0.422479208	0.727	0.478663466	0.586	0.35	0.37	0.37	0.37	0.37	0.838	0.815	0.37	0.314	0.665	0.454	0.467	0.628	0.586	0.397	0.566	0.643	1.309	1.405	1.362	1.505	0.636
1379	584.6811667	384.1148945	386.1211675	150.0565745	2.006272934	12618.33333	1	1	0.156	0.177	0.338	0.162	0.428	0.149	0.443	0.141	0.209	0.135	0.219	0.157	0.251	0.167	0.248	0.143	0.207	0.168	0.187	0.161	0.242	0.188	0.208	0.173	0.323	0.151	0.323	0.179	0.255	0.14	0.182	0.234	0.192	0.192	0.187	0.195	0.303	0.16	0.297	0.161	0.16
1392	585.823	388.135921	390.1443232	154.077601	2.008402157	3266	1	1	1.363	0.729	2.376	1.148	1.676	0.327	0.674	0.399	1.032	0.679	1.81	0.496	2.037	0.788	1.537	0.44	0.891	0.38	0.585	0.511	1.615	0.751	1.763	0.809	2.437	0.837	2.064	0.904	3.867	2.883	0.717	0.489	1.18	1.182	1.785	2.272	0.357	0.405	0.456	0.539	0.456
1395	585.8785	457.0665852	459.0727955	446.0165304	2.006210257	8865	2	2	0.534	0.579	0.545	0.604	0.538	0.604	0.515	0.491	0.531	0.527	0.453	0.559	0.618	0.718	0.556	0.583	0.811	0.688	0.69	0.699	0.668	0.712	0.718	0.715	0.66	0.764	0.628	0.655	0.556	0.554	0.501	0.534	0.475	0.465	0.492	0.555	0.51	0.624	0.596	0.71	0.563
1400	586.36325	457.0614805	459.0683329	446.006321	2.006852412	9743	2	2	0.55	0.586	0.529765023	0.608	0.536812472	0.546	0.50435866	0.48	0.541	0.528	0.528	0.551	0.602	0.639	0.554754256	0.581	0.862236771	0.684	0.683825253	0.708	0.699376817	0.727	0.711	0.739	0.657	0.684	0.587	0.663	0.552230524	0.544	0.507	0.534710213	0.485	0.448	0.492	0.545	0.496	0.692476447	0.63	0.753671304	0.595
1402	586.865	388.1349755	390.1421926	308.153311	2.007217133	3478	2	2	1.595	0.93	2.867	1.781	1.708	0.89	0.621	0.624	0.988	1.259	1.95	0.926	2.04	1.128	1.706	0.81	1.021	0.795	0.621	1.096	1.593	1.111	2.305	0.992	2.301	1.221	1.871	1.212	4.302	3.087	0.801	0.501	1.15	1.161	1.977	2.227	0.296	0.388157127	0.407	0.373163633	0.541
1405	586.9265	671.7342687	673.7411549	875.3518974	2.006886222	1960	2	2	0.58	0.749	1.233	1.477	1.07	1.145	0.423	0.71	0.892	1.081	1.129	1.437	0.793	0.694	1.145	2	0.747	1.721	0.766	0.964	0.61	0.815	0.519	0.924	1.095	1.252	1.524	1.408	0.833	0.889	0.6	0.608	0.916	0.84	0.947	1.066	0.731	0.766	0.914	0.919	0.911
1411	587.43	530.1527814	532.1599111	296.0944614	2.00712967	3590	1	1	0.675	0.178	0.424	0.209	0.23	0.202	0.279	0.182	0.12	0.300422571	0.12	0.226	0.12	0.187	0.235	0.287	0.12	0.284211722	0.12	0.345995678	0.266	0.16	0.177	0.223	0.12	0.279	0.274	0.276	0.182	0.19	0.215	0.292	0.282	0.345995678	0.241	0.265	0.191	0.345995678	0.472	0.345995678	0.366
1412	587.4928571	379.131607	381.1355515	290.146574	2.003944531	2384.857143	2	2	1.135	1.074	2.222	1.359	1.494268509	0.796	0.654	0.876	1.15972352	1.183000579	0.848613579	0.775	0.922	0.787	0.979	1.155176129	0.653689531	0.691	1.105097096	0.846	1.222	0.879	1.287320132	1.088	1.148	1.326	0.905171277	0.647	3.994	3.11	0.769	0.425679509	1.789	0.774	0.677	0.834	0.34	3.8	0.844306309	0.99715701	0.34
1413	587.502	584.3123587	586.3187789	350.2540387	2.006420164	3756	1	1	0.615	0.834	0.808	0.874	0.942	0.773	1.039	0.785	0.954	0.775	0.767	0.67	0.78	0.773	0.722	0.859	0.829	0.911	0.751	0.78	0.962	0.732	0.901	0.671	0.922	0.967	0.666	0.708	0.62	0.767	0.818	1.117	0.914	0.859	0.737	0.76	0.657	0.613	1.016	0.984	0.6
1415	587.8330752	388.1367259	390.1439238	308.1568118	2.007197928	4930.360902	2	2	1.479	0.743	2.32	1.218	1.654	0.581	0.645	0.471	1.036	0.863	1.7	0.639	2.278	0.899	1.664	0.585	0.923	0.652	0.502	0.62	1.618	0.807	1.771	0.819	2.209	0.995	1.904	0.97	4.012	2.978	0.737	0.476	1.345	1.174	1.753	2.376	0.347	0.406	0.483	0.52	0.414
1425	589.3969259	335.1420935	337.1487199	101.0837735	2.006626368	49783.85185	1	1	0.634	0.754	0.885	0.924	0.976	0.847	1.111	0.881	0.96	0.778	0.801	0.671	0.806	0.813	0.871	0.835	0.893	0.82	0.807	0.849	0.961	0.921	0.899	0.777	0.886	1.051	0.676	0.804	0.543	0.719	0.805	1.088	0.862	0.867	0.809	0.742	0.593	0.604	0.958	1.051	0.595
1426	593.5187349	383.1088427	385.1153891	149.0505227	2.00654636	2585580.744	1	1	0.775	0.963	0.722	0.73	0.79	0.609	0.722	0.644	0.751	0.635	0.863	0.752	0.939	1.006	0.978	0.839	0.81	0.823	0.738	0.727	0.909	0.93	0.856	0.82	0.744	0.835	0.744	0.866	0.494	0.524	0.714	0.273	0.847	0.787	0.768	0.765	0.651	0.671	0.857	0.855	0.569
1427	594.0653333	351.5865465	353.5946757	117.5282265	2.008129245	993773.2	1	1	0.67	0.707	0.571	0.624	0.621	0.544	0.43	0.456	0.586	0.599	0.946	0.801	0.777	0.677	0.701	0.632	0.734	0.576	0.629	0.724	0.587	0.557	0.664	0.594	0.648	0.782	0.584	0.754	0.711	0.844	0.597	0.154	0.485	0.603	0.448	0.609	0.493	0.512	0.518	0.502	0.534
1428	594.8131005	351.136889	353.1436865	117.078569	2.006797422	16955862.34	1	1	0.671	0.681	0.675	0.639	0.683	0.556	0.53	0.541307169	0.617	0.69	0.982	0.826	0.823	0.711	0.719	0.75	0.691	0.64	0.671	0.78	0.649	0.71	0.701	0.606	0.686	0.71	0.7	0.686	0.808	0.901	0.6	0.196	0.566	0.586	0.522	0.655	0.539	0.641	0.557	0.652	0.576
1429	596.156	470.1911233	472.1975867	472.2656067	2.006463307	45504	2	2	1.022	1.092	1.554	1.807	1.009	1.131	0.658	0.695	0.985	1.123	0.978	1.098	0.697	0.822	0.969	1.217	0.946	1.136	1.128	1.163	1.404	1.518	1.28	1.248	1.125	1.655	1.21	1.511	0.507	0.658	0.734	2.158	0.873	0.745	0.772	0.935	0.856	0.906415842	1.429	0.86	1.468
1430	597.508	388.6392213	390.6458952	309.1618027	2.006673876	3290.666667	2	2	1.657	1.062	2.589	2.289	1.706	0.971	0.671	0.849785712	1.157	1.294568393	1.836	1.043	1.862	1.688	1.721	1.1	1.126	1.155	0.646	1.502	1.526	1.232	2.245	1.146	2.212	1.581	2.083	1.456	3.59	3.204	0.901	0.51	1.284	1.319	1.547	1.884	0.409	0.380732052	0.623	0.696113642	0.517
1431	600.5486261	388.1369874	390.1436856	308.1573348	2.006698249	15535.49565	2	2	1.44	0.793	2.32	1.385	1.666	0.627	0.64	0.535	1.01	0.918	1.651	0.758	1.969	0.867	1.659	0.705	1.026	0.67	0.502	0.715	1.834	0.851	1.831	0.937	2.049	0.968	1.904	0.961	4.012	2.827	0.732	0.43	1.101	1.068	1.584	2.067	0.337	0.352	0.449	0.444	0.411
1436	602.268	635.2102852	637.2168498	401.1519652	2.006564661	5000	1	1	0.731	0.56	0.748	0.839	0.864	1.027	1.057	0.934992823	0.896	0.913965602	0.732	0.678	0.738	0.648	0.907	0.857	1.001	0.909998651	0.823	0.86	0.849	0.947	0.902	0.934	0.703	0.971	0.859	0.885	0.51	0.685	0.683	1.073	0.913	0.839	0.793	0.662	0.579	0.605	1.097	0.899	0.519
1438	602.323	457.0622199	459.0691724	223.0038999	2.006952511	8032	1	1	0.563	0.574	0.555	0.608	0.508	0.548	0.469	0.493	0.512	0.529	0.435	0.56	0.576	0.629	0.525	0.584	0.785	0.682	0.701	0.702	0.628	0.711	0.682	0.712	0.611	0.68	0.598	0.672	0.529	0.543	0.491	0.564	0.486	0.481	0.491	0.556	0.476	0.7	0.587	0.659	0.575
1441	602.6218429	335.1418459	337.1484131	101.0835259	2.006567184	62677.81302	1	1	0.637	0.731	0.883	0.914	0.976	0.842	1.119	0.877	0.96	0.796	0.801	0.659	0.806	0.817	0.869	0.815	0.892	0.829	0.813	0.821	0.962	0.904	0.905	0.779	0.882	1.042	0.676	0.801	0.547	0.718	0.801	1.091	0.857	0.864	0.806	0.742	0.586	0.603	0.955	1.048	0.592
1444	603.53825	457.0619492	459.06868	446.0072583	2.006730865	7505.5	2	2	0.548	0.574	0.501	0.607	0.548	0.557	0.475	0.494	0.458	0.529	0.439	0.56	0.526	0.635	0.494	0.583	0.814	0.684	0.693	0.7	0.637	0.719	0.693	0.721	0.627	0.679	0.621	0.667	0.564	0.55	0.484	0.66	0.465	0.5	0.489	0.574	0.44	0.7	0.595	0.661	0.601
1445	603.7407692	415.1175574	417.1242499	181.0592374	2.006692485	3156.307692	1	1	0.704	0.714	0.654	0.746	0.869	0.981	0.799	0.665	0.759	0.77	0.838	0.586	0.944	0.764	0.86	0.749	0.856	0.877	0.687	0.841	1.176	1.316	1.007	0.68	0.617	0.523	0.735	0.884	1.005	1.028	0.616	0.536	0.748	0.771	0.92	0.686	0.59	0.970935	1.116	1.177	0.402
1446	603.7515877	365.1159106	367.12265	131.0575906	2.006739405	20427.91469	1	1	0.758	1.114	0.603	0.748	0.711	1.434	0.92	1.24	0.833	0.94	0.619	0.738	0.737	1.496	0.639	1.287	0.56	0.881	0.672	1.293	0.517	1.304	0.617	1.136	0.65	1.83	0.568	0.683	0.499	0.644	0.667	0.984	1.268	1.249	0.857	0.653	0.441	0.458	0.651	0.607	0.455
1456	604.87875	335.1422106	337.1487994	101.0838906	2.006588795	101751	1	1	0.638	0.714	0.884	0.906	0.977	0.843	1.119	0.871	0.965	0.796	0.802	0.652	0.807	0.811	0.87	0.815	0.894	0.835	0.81	0.801	0.964	0.886	0.902	0.77	0.88	1.042	0.682	0.803	0.55	0.721	0.799	1.09	0.85	0.866	0.807	0.74	0.589	0.602	0.951	1.043	0.592
1458	604.9753103	362.1527521	364.1592698	128.0944321	2.006517666	3472.068966	1	1	0.425	0.529	0.996	0.875	0.323	0.596	7.958	9.324196255	0.599	0.918	0.676	1.183	0.378	0.506	0.684	0.974	0.585	0.749	0.718	1.198	0.59	0.789	0.405	0.554	1.372	2.361	0.527	1.079	0.548	1.151	0.484	1.16	0.524	0.524	0.378	0.546	0.692	0.648	1.064	1.035	1.357
1467	606.0823333	388.1375127	390.1466532	154.0791927	2.009140585	5360.666667	1	1	0.929	0.343	1.534	0.451	1.25	0.327	0.523	0.209	0.66	0.649253939	1.282	0.39	1.094	0.43	1.15	0.394	0.797	0.38002691	0.404	0.203	1.215	0.397	1.428	0.640593124	1.633	0.563	1.634	0.472	2.62	2.012	0.579	0.349	0.709	0.569	0.974	1.304	0.353	0.311	0.401	0.312	0.382
1472	606.361	323.1049908	325.1126302	89.0466708	2.007639385	3680	1	1	0.669	1.191	0.588	0.579	0.646	0.566	0.711	0.592796074	0.691	0.695919974	0.738	0.638649401	0.771	0.858	0.674	0.748031082	0.647	0.663210985	0.695	0.542947771	0.646	0.807	0.753	0.716	0.701	0.83	0.781	0.874	0.692	0.719	0.6	0.421	0.664	0.652	0.703	0.76	0.539	0.446	0.594	0.552	0.694
1480	606.444	321.6153842	323.6228445	87.55706419	2.007460343	14954	1	1	0.931	0.499	1.019	0.642	1.075	0.425	1.174	0.306	0.877	0.267	1.036	0.322	1.079	0.34	1.075	0.342	1.101	0.336	1.021	0.324	0.517	0.26	0.756	0.322	1.247	0.679	0.615	0.411	0.898	1.044	0.737	0.59	1.429	1.496	1.217	0.73	0.944	1.014	1.273	1.319	0.886
1482	606.5119259	422.1732106	424.179658	188.1148906	2.006447438	3466.222222	1	1	0.868	0.88	1.668	1.462	1.13	1.01	1.086	1.227	0.583	0.511	0.578	0.658	1.258	1.257	0.519	0.508	0.401	0.376	0.887	0.976	1.126	1.26	0.907	0.807	0.705	0.832	0.366	0.384	1.042	1.199	0.445	0.263	1.734	1.638	1.758	0.497	0.272	0.22	0.438	0.485	0.268
1499	607.5097778	321.1138996	323.120476	87.05557959	2.006576424	16534.66667	1	1	0.824	1.069	0.963	0.877	0.968	0.823	1.011	0.856	0.812	0.665	0.949	0.817	1.095	1.136	0.946	0.921	0.948	0.969	0.948	0.905	0.484	0.461	0.718	0.666	1.145	1.268	0.573	0.629	0.782	0.935	0.628	0.525	1.374	1.326	1.157	0.701	0.907	0.908	1.137	1.177	0.848
1501	607.6318182	412.1300024	414.1362245	178.0716824	2.006222078	3485.454545	1	1	0.924	0.562	0.951	0.47	0.625	0.576	0.721	0.617	0.67	0.772	0.829	0.78	0.877	0.608	0.672	0.524	0.739	0.425	0.712	0.918	0.814	0.662	0.671	0.495	0.436	0.437	0.418	0.505	0.533	0.665	0.515	1.05	1.13	1.03	1.25	0.655	0.439	0.483	0.425	0.452	0.396
1502	607.77825	321.6162862	323.6235295	175.1159325	2.007243279	10477.5	2	2	0.923	0.323	1.019	0.327	1.075	0.271	1.174	0.306	0.877	0.267	1.045	0.216	0.908	0.34	1.113	0.342	1.101	0.191	1.018	0.324	0.517	0.189	0.725	0.182	1.247	0.532	0.615	0.216	0.898	1.044	0.738	0.59	1.128	1.026	1.217	0.73	1.007	1.006	0.872	1.319	0.886
1513	608.388	568.2512461	570.2584859	334.1929261	2.007239783	4502	1	1	1.376	2.874	1.878	4.639	0.923	1.033	0.664	0.917	0.991	1.397	1.183	1.337	0.621	0.842	1.081	1.445	1.176	1.693	1.063	1.065	1.606	2.001	1.123	1.332	1.095	1.744	1.557	1.504	0.627	0.911	0.689	4.124	1.099	1.013	0.69	1.072	0.781	0.803	1.31	1.568	1.498
1522	608.471	568.2517505	570.2581189	668.3868609	2.006368446	4604	2	2	1.376	2.874	1.878	4.639	0.923	0.977	0.664	0.917	0.991	1.397	1.183	1.42	0.64	0.834	1.081	1.193	1.176	1.332	1.063	1.206	1.606	1.902	1.123	1.413	1.095	1.744	1.557	1.596	0.627	0.921	0.689	4.124	1.099	1.013	0.69	1.072	0.781	0.803	1.31	1.568	1.498
1525	608.8027133	369.6399375	371.6466736	271.1632351	2.00673607	2626.85309	2	2	0.803	1.065	0.856	0.806	0.663	0.734	0.645	0.781	0.676	0.724	0.918	0.872	0.668	0.785	0.614	0.731	0.877	0.675	0.772	0.88	0.24	0.276	0.408	0.326	0.388	0.635	0.359	0.28	0.284	0.505	0.371	0.84	1.576	0.704	1.411	0.387	0.571	0.11	0.491	0.721606424	0.439
1532	609.414	454.1777945	456.1836518	220.1194745	2.005857343	1904	1	1	0.638	0.438	0.907	0.553	0.829	0.648	0.914	0.784	0.713	0.752	0.966	0.994	0.724	0.86	0.653	0.797	0.866	0.654	0.767	0.783	0.838	0.837	0.578	0.482	0.533	0.571	0.479	0.502	0.546	0.641	0.572	0.785	1.299	1.233	1.414	0.701	0.496	0.528	0.559	0.562	0.449
1535	609.49	568.7521495	570.7597043	669.3876589	2.007554842	2118	2	2	1.237	2.555	1.901	4.231	0.882	1.178	0.808	0.847	1.233	1.465	1.042	1.494	0.646	0.795	1.014	1.319	0.741	0.915	1.015	1.208	1.353	2.203	1.362	1.306	1.276	2.359	1.444	1.763	0.656	0.756	0.669	4.963	0.659	0.906	0.72	1.009	0.716	0.935	1.263	1.157	1.352
1544	610.453	364.6251308	366.6319211	130.5668108	2.006790344	12898	1	1	1.686	2.056	0.766	0.495	0.527	0.564	0.742	1.068	0.717	0.313	0.336	0.364	0.436	0.528	0.638	0.775	0.605	0.197	0.413	0.459	0.536	0.435	0.47	0.373	0.486	0.617	0.377	0.378	0.473	0.533	0.6	0.284	0.543	0.449	0.466	0.538	0.397	0.331	0.257	0.282	1.316
1546	610.489	365.1231319	367.1297006	262.1296239	2.006568661	2943	2	2	2.206	1.997	0.801	0.669	0.525	0.61	1.229	1.17	0.425	0.96	0.586	0.483	0.426	0.482	1.018	0.918	0.842	0.443	0.425	0.908	0.656	0.518	0.595	0.507	0.714	0.678	0.463	0.405	0.744	0.481	0.682	0.395	0.428	1.735770259	0.396	0.567	0.524	0.398	0.411	0.299	1.817
1549	610.519	412.0907885	414.0984282	356.064937	2.007639723	2444	2	2	0.768	1.001718746	0.999	1.009	0.961	0.981	0.751	0.718	0.499	0.881	1.038	1.076	1.296	1.501	1.191	1.509	1.739	0.889623078	0.901	1.551	1.384	1.239	2.658	3.032	1.046	0.896	1.102	0.703	0.912	0.915	0.684	1.177	0.805	0.65	0.858	0.689	1.275	1.303	0.889	0.841	1.579
1553	610.9303802	411.0919105	413.09819	354.0671811	2.006279451	5713.024793	2	2	0.606	0.808	0.682	0.796	0.761	0.584	0.332	0.397	0.438	0.452	0.825	0.611	1.248	1.35	0.82	0.996	1.274	0.573	0.625	0.858	1.257	1.309	2.377	2.381	0.704	0.609	0.668	0.621	0.693	0.635	0.477	0.685	0.501	0.447	0.469	0.615	1.17	1.289	0.685	0.763	1.191
1554	610.956	364.6248403	366.6315642	261.1330405	2.006723902	14475	2	2	1.568	2.056	0.832	0.466	0.477	0.474	0.728	1.05	0.776	0.323	0.381	0.359	0.476	0.43	0.715	0.604	0.616	0.221	0.586	0.459	0.563	0.363	0.569	0.41	0.467	0.637	0.332	0.329	0.449	0.555	0.558	0.282	0.561	0.546	0.535	0.594	0.405	0.397	0.317	0.304	1.139
1566	611.8760201	552.1791438	554.1855594	318.1208238	2.006415645	5193.543624	1	1	0.381	0.544	1.581	1.472	1.087	0.793	1.165	1.006	0.309	0.353	0.637	0.579	1.476	1.222	1.732	1.406	0.481	1.215	3.252	3.678	2.63	2.383	1.041	0.922	0.921	0.716	0.698	0.604	0.501	0.59	0.476	0.357	0.505	0.444	0.615	1.245	0.889	0.452	1.794	1.868	0.852
1567	612.1990769	447.1329089	449.1392134	213.0745889	2.006304447	3769.384615	1	1	0.197	0.27	1.181351149	1.228	0.27	0.27	0.503	0.27	0.434	0.27	0.27	0.27	0.855	0.27	0.27	1.343	0.259	0.27	0.674	3.69	0.27	0.27	0.27	0.27	0.27	0.27	0.27	0.27	0.27	0.27	0.512	0.458	0.633009407	0.87	0.27	0.27	0.249	0.78	0.296	1.45	0.555641033
1568	612.3159048	335.1419088	337.1484634	101.0835888	2.006554625	47846.38095	1	1	0.643	0.719	0.887	0.913	0.977	0.838	1.123	0.885	0.97	0.788	0.804	0.641	0.807	0.804	0.874	0.815	0.898	0.846	0.816	0.808	0.963	0.892	0.902	0.774	0.88	1.037	0.681	0.805	0.55	0.718	0.795	1.098	0.847	0.865	0.81	0.747	0.588	0.602	0.956	1.04	0.595
1573	612.6937647	369.6061893	371.6126606	271.0957386	2.006471342	2571.647059	2	2	0.785	0.966	0.991	0.908	1.123	0.811	1.049	1.018	0.852	0.362	1.096	0.688	1.157	0.995	1.052	0.769	1.143	1.209	1.011	0.914	0.509	0.422	0.738	0.872	1.088	1.261	0.484	0.535	0.785	0.906	0.644	0.62	1.447	1.481	1.048	0.831	0.968	0.856	1.16	0.944	0.845
1574	612.7086698	321.1140023	323.120673	174.1113646	2.006670712	575206.2419	2	2	0.827	0.994	0.958	0.863	0.969	0.842	1.011	0.844	0.813	0.652	0.949	0.787	1.101	1.086	0.934	0.947	0.948	0.977	0.945	0.9	0.485	0.455	0.718	0.622	1.14	1.272	0.571	0.621	0.777	0.939	0.63	0.529	1.39	1.32	1.148	0.701	0.907	0.915	1.154	1.177	0.844
1575	612.7103576	312.6005271	314.6073107	157.0844143	2.006783565	5367.793939	2	2	0.895	1.104	1.01	0.982	1.058	0.959	1.011	1.024	0.804	0.739	1.094	0.793	0.965	1.281	1.322	0.972	0.99	1.092	0.85	0.94	0.668	0.562	0.85	0.905	1.387	1.299	0.69	0.694	0.96	0.966	0.821	0.73	1.5	1.319	1.36	0.888	0.991	0.811	1.259	1.557	1.022
1576	612.7562137	340.087485	342.0939295	212.0583301	2.006444409	3388.940171	2	2	0.886	0.937	1.032	0.853	0.973	0.945	0.972	0.902	0.873	0.642	0.898	0.9	0.971	1.233	1.05	0.867	0.928	1.036	0.892	0.818	0.522	0.436	0.728	0.551	1.02	1.463	0.657	0.588	0.725	0.978	0.77	0.616	1.432	1.38	1.13	0.685	0.986	0.986	1.067	1.192	0.846
1577	612.9951255	322.113953	324.1203691	176.111266	2.006416116	56166.56812	2	2	0.878	1.041	1.054	0.931	1.026	0.886	1.086	0.921	0.824	0.677	1.037	0.832	1.203	1.186	1.019	0.997	1.051	1.043	0.917	0.983	0.5	0.505	0.775	0.673	1.174	1.238	0.603	0.655	0.812	1.011	0.693	0.563	1.421	1.424	1.218	0.734	0.96	0.972	1.172	1.203	0.891
1580	613.536	411.0897125	413.0952777	177.0313925	2.005565171	2936	1	1	0.573	0.815	0.648713749	0.773	0.644318106	0.579	0.317446422	0.386	0.441	0.453	0.827298934	0.659	1.158	1.183	0.988	0.998	1.158758527	0.587	0.625172234	0.821	1.051	1.368	1.79	2.244	0.697	0.609	0.785	0.692	0.693270039	0.583	0.462999888	0.668160549	0.439	0.447482037	0.496554064	0.66334165	1.047	1.239	0.727	0.866	1.286
1584	613.6548933	408.1695109	410.1760282	174.1111909	2.006517269	16583.57284	1	1	0.94	1.152	1.012	1.013	0.981	0.903	1.102	0.911	0.87	0.641	1.037	0.809	1.135	1.119	1.037	1.038	1.099	1.042	1.06	0.898	0.552	0.465	0.767	0.76	1.137	1.349	0.631	0.698	0.874	0.971	0.702	0.598	1.487	1.395	1.144	0.772	0.912	0.963	1.232	1.274	0.841
1585	613.8146667	376.0966495	378.1022203	142.0383295	2.005570839	6427.333333	1	1	0.576	0.275	0.453	0.201	0.307	0.426	0.322	0.36	0.29	0.363	0.254	0.278	0.223	0.397	0.275	0.32	0.223	0.246	0.299	0.271	0.25	0.328	0.278	0.205	0.241	0.323	0.17	0.233	0.132	0.142	0.273	1.519	0.316	0.269	0.328	0.3	0.223	0.1001	0.305	0.242	0.206
1586	613.9541951	256.0771868	258.0839966	44.03773362	2.006809754	4551.804878	2	2	0.842	1.463	0.583	0.534	0.587	0.767	0.752	0.576	0.93	0.486	0.443	0.52	0.495	1.057	0.277	0.683	0.772	0.804	0.612	0.64	1.14	1.142	0.789	1.145	0.292	1.044	0.256	0.433	0.267	0.374	0.886	1.009	0.728	0.749	0.229	0.352	0.891	0.717743062	0.947	0.803	0.923
1594	614.7534268	495.1691066	497.1755055	261.1107866	2.006398946	3617.902439	1	1	0.45	0.526	0.879	0.863	0.571	0.52	0.799	0.746	0.696	0.615	0.511	0.502	0.725	0.694	0.523	0.464	0.753	0.591	0.709	0.616	0.12	0.1001	0.258	0.238	1.341	1.519	0.333	0.365	0.861	0.881	0.238	0.154	0.931	0.896	0.789	0.754	0.259	0.269	0.476	0.492	1.059
1595	615.4329706	400.106899	402.1134123	166.048579	2.006513262	30417.36275	1	1	0.1	0.1	0.332	0.298	0.587	0.432	1.067	0.948	1.029	0.967	0.214	0.172	0.594	0.454	0.79	0.663	0.559	4.12	0.886	0.74	1.993	1.755	3.452	3.018	1.144	1.108	2.775	2.96	0.1	0.1	0.624	0.565	0.621	0.686	0.753	0.156	0.744	0.677	0.387	0.322	0.189
1596	615.442493	346.0850038	348.0916718	112.0266838	2.006668052	16683.88837	1	1	0.524	0.601	0.649	0.601	1.682	1.17	0.681	0.523	1.222	1.11	1.191	1.012	1.467	1.087	0.961	0.722	0.551	0.838	1.13	1.055	1.401	1.244	1.881	1.441	1.457	1.314	1.15	1.221	0.809	0.976	0.942	0.89	1.095	1.407	1.537	0.701	0.922	0.943	0.667	0.672	0.502
1598	616.3463125	502.1454131	504.1518407	268.0870931	2.006427602	5666.5	1	1	0.382	0.462	0.381	0.416	0.433	0.47	0.329	0.333	0.457	0.462	0.441	0.423	0.438	0.549	0.402	0.487	0.409	0.436	0.404	0.539	0.454	0.48	0.494	0.358	0.411	0.458	0.443	0.414	0.432	0.331	0.405	0.341	0.357	0.458	0.376	0.438	0.426	0.425	0.393	0.468	0.38
1602	617.1105	642.2233432	646.2370205	175.1140032	4.013677341	5591	1	2	0.93	1.16	1.089	0.981	1.069	0.951	1.202	1.016	0.872	0.741	1.121	0.876	1.173	1.137	1.049	1.02	1.147	1.148	1.076	0.925	0.525	0.589	0.795	0.741	1.215	1.439	0.595	0.786	0.858	0.989	0.782	0.602	1.601	1.57	1.283	0.754	0.986	1.068	1.312	1.357	0.929
1605	617.278	349.1217726	351.1310393	115.0634526	2.00926665	23836	1	1	0.698007598	0.28	0.734216541	0.299	9.99	0.321	0.642543034	0.383	9.99	0.37	9.99	0.273	9.99	0.283	9.99	0.283	0.898909321	0.331	9.99	0.363	9.99	0.407	0.684	0.258	9.99	0.27	9.99	0.237	9.99	0.824	0.385305646	0.697	1.253	0.551396396	1.291	0.43902384	0.303137163	0.553	0.358814521	0.503	0.377414355
1609	619.3996667	457.5645204	459.5713951	447.0124008	2.006874705	2654	2	2	0.602	0.669	0.577	0.71	0.586	0.605	0.611	0.517	0.57	0.539	0.48	0.656	0.597	0.75	0.58	0.65	0.853	0.753	0.749	0.71	0.74	0.811	0.746	0.807	0.624	0.713	0.699	0.704	0.62	0.62	0.533	0.583	0.47	0.539	0.584	0.582	0.578	0.4	0.601	0.842838233	0.547
1610	619.6748491	418.1425506	420.1490388	184.0842306	2.006488195	4433.245283	1	1	0.72	0.937	1.07	0.856	0.849	0.897	0.739	0.793	0.683	0.884	1.381	1.09	0.714	0.723	0.77	0.881	0.986	0.922	0.83	1.289	0.578	0.76	0.527	0.584	0.493	0.765	0.601	0.568	0.474	0.832	0.581	1.065	1.589	1.721	1.397	0.854	0.701	0.619	0.624	0.601	0.629
1615	620.8035	379.1307274	381.1362722	290.1448149	2.005544751	6737	2	2	1.038	1.089	1.88	1.468	0.864	0.839	0.925	0.809	1.188	1.149	0.782	0.758	0.758	0.792	1.178	1.119	0.784	0.852	1.03	1.003	1.111	0.987	1.207	1.055	1.051	1.313	0.656	0.674	0.754	0.795	0.75	0.479	0.757	0.759	0.824	1.144	0.317	0.392	0.783	0.829	0.598
1619	622.0224752	337.0847123	339.0913671	103.0263923	2.006654735	234093.773	1	1	0.588	0.193	0.353	0.103	0.143	0.181	0.179	0.177	0.159	0.198	0.117	0.149	0.175	0.275	0.103	0.138	0.1	0.165	0.119	0.131	0.159	0.166	0.273	0.245	0.132	0.181	0.143	0.142	0.106	0.126	0.21	0.657	0.225	0.283	0.193	0.186	0.135	0.156	0.217	0.244	0.128
1620	622.1880828	277.100387	279.1078595	43.04206697	2.007472492	9366.013793	1	1	0.735	0.689	0.515	0.323	0.581	0.427	0.597	0.536	0.65	0.555	0.556	0.491	0.674	0.626	0.581	0.647	0.877	0.779	0.509	0.529	0.995	0.792	1.075	0.848	0.735	0.847	0.644	0.801	0.614	0.737	0.535	0.5	0.718	0.634	0.728	0.551	0.718	0.768	0.669	0.563	0.556
1621	622.3162581	349.0848141	351.091286	115.0264941	2.006471913	8745.677419	1	1	0.73	0.674	0.479	0.41	0.591	0.415	0.594	0.609	0.713	0.525	0.519	0.46	0.687	0.589	0.56	0.571	0.908	0.819	0.571	0.49	0.995	0.881	1.276	0.825	0.842	0.84	0.651	0.783	0.563	0.774	0.535	0.485	0.71	0.691	0.666	0.478	0.78	0.75	0.67	0.609	0.604
1622	622.4981385	442.1443194	444.1494624	208.0859994	2.00514301	95694.86154	1	1	0.757	0.85	0.494	0.41	0.597	0.441	0.664	0.564	0.711	0.644	0.646	0.538	0.654	0.733	0.58	0.618	0.889	0.759	0.569	0.521	1.063	0.939	1.196	0.861	0.801	0.848	0.679	0.917	0.621	0.736	0.54	0.525	0.746	0.675	0.657	0.521	0.78	0.814	0.693	0.624	0.523
1624	623.2396875	388.156992	390.1635084	154.098672	2.006516438	5980.3125	1	1	0.56	0.752	0.718	0.794	1.07	0.743	0.742	0.634	0.3	0.561	0.996	0.748	0.6	0.675	1.221	0.784	0.849	0.896	1.089	0.818	1.316	0.864	1.244	0.761	1.58	0.915	1.09	1.139	0.825	0.872	0.798	0.923	0.594	0.531	0.539	0.885	0.824	0.792	0.923	0.926	0.732
1626	623.52875	371.6325445	373.6393491	137.5742245	2.006804601	7976.5	1	1	0.612	0.517	1.713	1.403	0.608	0.752	0.651	0.679	0.597	0.595	0.575	0.791	0.497	0.546058041	0.753	0.782201174	0.758	0.684430298	0.728	0.777131192	0.516	0.571007964	0.469	0.489	0.688	0.826	0.431	0.46	0.524	0.539	0.509	0.194	0.585	0.61	0.508	0.695	0.482	0.543	0.847	0.886	0.5
1627	623.8833333	380.1164604	382.124227	146.0581404	2.007766556	11394	1	1	1.449	1.434	1.134	1.083	1.585	1.575	0.735	0.769	1.057	0.81	1.538	1.148	1.041	0.884	1.34	1.199	1.078	1.353	1.202	1.668	1.744	1.527	1.477	1.455	1.633	1.706	1.457	1.8	0.194	0.149	0.577	0.781	1.633	1.503	1.656	1.318	1.039	1.002	2.037	1.733	1.318
1629	626.2994455	365.1160421	367.1226541	131.0577221	2.006612021	56028.27488	1	1	0.751	0.801	0.595	0.444	0.712	0.711	0.951	0.781	0.82	0.643	0.622	0.614	0.74	0.944	0.639	0.641	0.559	0.52	0.673	0.707	0.522	0.414	0.626	0.535	0.622	0.745	0.578	0.797	0.53	0.642	0.694	1.014	1.237	1.207	0.829	0.654	0.429	0.435	0.644	0.607	0.452
1630	627.2172368	371.6322061	373.6388862	275.1477722	2.006680087	50821.18019	2	2	0.612	0.687	1.713	1.41	0.608	0.622	0.662	0.65	0.579	0.521	0.584	0.55	0.497	0.543	0.753	0.784	0.763	0.697	0.728	0.777131192	0.516	0.522	0.469	0.435	0.678	0.831	0.422	0.488	0.524	0.539	0.509	0.194	0.585	0.614	0.508	0.695	0.482	0.543	0.847	0.886	0.489
1631	627.2954439	438.1477466	440.1543943	204.0894266	2.00664774	5296389.028	1	1	0.635	0.782	0.704	0.683	0.649	0.473	0.495	0.446	0.527	0.456	0.888	0.743	0.938	0.825	0.9	0.737	0.76	0.654	0.798	0.718	0.758	0.715	0.819	0.741	0.964	1.005	0.993	1.189	0.523	0.592	0.525	0.197	0.559	0.538	0.516	0.653	0.661	0.682	0.829	0.816	0.729
1632	628.8782138	378.0667273	380.0715523	144.0084073	2.004824948	35840.55346	1	1	1.289	1.36	1.21	1.043	1.567	1.236	1.545	1.039	1.396	1.128	1.387	1.002	1.857	1.457	1.52	1.359	1.067	1.35	1.793	1.394699494	1.661	1.339	1.715	1.199	1.567	1.637	0.92	1.205	0.647	0.902	0.93	1.221	1.467	1.55	1.028	0.914	0.981	3.289695203	1.306	2.682860006	0.772
1633	629.4695302	400.0844692	402.0909935	166.0261492	2.006524289	270461.0512	1	1	0.913	1.191	1.225	1.144	0.864	0.636	1.231	0.633	0.498	0.57	0.667	0.646	1.587	1.234	1.198	0.859	0.468	0.887	1.349	0.981	1.573	1.037	1.283	0.882	0.805	0.419	0.929	0.793	0.732	0.693	0.74	0.388	0.702	0.754	1.02	0.851	0.667	0.633	1.184	1.196	1.185
1635	632.385625	311.0827723	313.0894557	154.0489046	2.006683401	51402.10577	2	2	0.327	0.39	1.222	1.43	1.018	0.78	1.348	1.135	0.85	0.767	0.831	0.611	1.253	1.114	0.639	0.597	0.716	0.622	0.901	0.983	0.551	0.469	0.658	0.617	1.125	1.151	1.497	1.719	0.605	0.685	0.919	0.823	1.19	1.304	1.146	0.523	0.641	0.61	0.785	0.718	0.46
1636	632.5128705	424.1055393	426.1121836	190.0472193	2.006644301	7135.208633	1	1	0.449	0.346	0.541	0.552	0.842	0.56	0.516	0.345	1.074	0.794	0.771	0.544	0.946	0.756	0.558	0.463	0.53	0.609	0.732	0.67	1.056	0.771	0.817	0.562	0.863	0.676	0.992	0.952	1.003	0.934	0.604	0.707	0.419	0.499	0.627	0.846	0.424	0.278	1.097	1.166	0.618
1637	632.5583088	312.0826249	314.0891718	156.0486098	2.006546934	5117.235294	2	2	0.347	0.36	1.426	1.464	1.167	0.861	1.427	1.125	0.945	0.819	0.892	0.78	1.362	1.106	0.739	0.651	0.846	0.644	0.957	0.81	0.587	0.541	0.827	0.667	1.279	1.219	1.662	1.826	0.674	0.696	0.827	0.849	1.209	1.226	1.243	0.746	0.728	0.692	0.758	0.982	0.561
1638	633.08078	323.1360997	325.1435298	89.0777797	2.007430052	6476.2	1	1	0.57	0.501	1.588	1.615	1.425	1.084	1.365	1.302	1.115	0.963	1.081	0.877	1.571	1.302	0.85	0.739	0.908	0.755	1.247	1.285	0.766	0.774	0.992	0.815	1.415	1.343	1.698	2.235	0.903	1.158	1.062	1.173	1.507	1.661	1.625	0.807	0.91	1.37	1.045	1.43	1.029
1642	634.95	457.0630856	459.0695243	223.0047656	2.006438736	3724	1	1	0.565	0.527	0.568	0.631	0.56	0.57	0.483	0.48	0.582	0.51	0.453	0.583	0.587	0.542	0.548	0.522	0.769	0.619	0.767	0.617	0.557	0.638	0.668	0.664	0.5	0.567	0.652	0.635	0.455	0.51	0.464	0.401	0.487	0.608	0.622	0.509	0.494	0.567	0.547	1.241	0.501
1643	635.143	383.108798	385.1164054	149.050478	2.007607405	2340	1	1	0.745	0.664	0.713	0.618	0.798	0.429	0.713	0.513	0.822	0.585	0.911	0.638	0.884	0.628	0.907	0.5	0.835	0.536	0.735	0.456	0.963	0.629	0.88	0.475	0.767	0.62	0.733	0.515	0.523	0.583	0.672	0.305	0.797	0.819	0.758	0.755	0.668	0.708	0.777	0.767	0.612
1644	635.159	622.161097	626.1740684	155.051757	4.012971397	5440	1	2	0.437	0.424	1.548	1.718	1.397	1.018	1.529	1.257	1.01	0.959	0.919	0.81	1.525	1.386	0.895	0.692	0.826	0.703	1.153	0.981	0.709	0.607	0.859	0.69	1.321	1.313	1.922	2.11	0.768	0.897	1.094	0.911	1.604	1.488	1.475	0.617	0.884	0.722	0.943	0.9	0.571
1645	635.1837879	539.1357666	543.1491347	72.02642662	4.013368081	5913.727273	1	2	0.601	0.698	0.592	0.583	0.582	0.574	0.602	0.489	0.645	0.511	0.533	0.515	0.543	0.751	0.556	0.602	0.594	0.605	0.595	0.82	0.451	0.409	0.457	0.412	0.578	0.712	0.466	0.52	0.407	0.471	0.609	0.791	0.458	0.497	0.422	0.44	0.509	1.392	0.547	0.887	0.396
1646	635.5828571	539.6371375	543.6506968	72.52779752	4.01355925	2976.571429	1	2	0.652	0.894	0.643	0.57	0.751	0.694	0.757	0.637	0.743	0.611	0.579	0.693	0.527	0.672	0.697	0.707	0.628	0.749	0.759	0.649	0.476	0.352	0.491	0.302	0.531	0.907	0.437	0.534	0.51	0.463	0.602	0.986	0.443	0.774	0.504	0.647	0.552	0.572528796	0.722	0.44	0.432
1647	636.0784286	397.1248832	399.1312966	163.0665632	2.006413428	9354.952381	1	1	0.672	0.616	0.388	0.299	0.698	0.671	1.2	1.013	0.401	0.387	0.497	0.348	0.542	0.552	0.862	0.855	0.616	0.895	0.932	0.82	1.389	1.309	0.947	0.942	0.743	0.827	0.47	0.411	0.774	0.929	0.584	0.565	0.598	0.561	0.595	0.475	0.359	0.33	0.881	0.731	0.343
1649	637.6639375	414.1224208	416.1290671	180.0641008	2.006646311	6121.625	1	1	0.301	0.263	0.188	0.165	0.589	0.365	0.813	0.745	0.788	0.827	0.865	0.629	0.221	0.183	0.817	0.599	0.998	1.186	1.205	0.978	0.528	0.418	1.578	1.121	1.386	1.381	1.616	1.742	0.123	0.124	0.288	0.293	0.1001	0.854	0.1001	0.369	0.331	0.361	0.145	0.167	0.1001
1652	639.8221	456.1583213	458.1648801	222.1000013	2.006558775	60254.42857	1	1	0.25	0.263	1.649	1.631	0.374	0.351	0.876	0.815	0.321	0.293	0.299	0.266	0.861	0.825	0.318	0.294	0.437	0.327	0.479	0.453	0.1	0.1	0.124	0.118	1.109	1.289	0.209	0.251	0.88	1.086	0.285	0.169	1.232	1.275	1.041	0.421	0.4	0.398	0.536	0.507	0.99
1653	641.293	606.3975262	608.4046555	372.3392062	2.007129311	3600	1	1	0.658	0.435	0.646	0.497	0.759	0.438	0.595	0.521	0.686	0.615	0.54	0.407	0.727	0.613	0.64	0.434	0.635	0.487	0.649	0.385	0.777	0.748	0.569	0.549	0.636	0.495	0.722	0.502	0.697	0.528	0.713	0.559	0.692	0.434	0.732	0.696	0.604	0.444	0.628	0.421	0.641
1654	642.0130379	378.1000466	380.1065971	144.0417266	2.006550516	35074	1	1	0.648	0.575	0.727	0.508	0.81	0.605	0.621	0.483	0.651	0.565	0.693	0.562	0.883	0.726	0.812	0.618	0.662	0.7	0.806	0.643	1.182	1.035	1.256	1.018	0.909	0.851	0.712	0.779	2.402	2.635	0.68	0.906	0.63	0.686	0.599	0.73	0.6	0.614	0.964	1.024	0.628
1658	642.4818148	474.1577868	476.1644074	240.0994668	2.006620604	6742.148148	1	1	0.588	0.65	0.634	0.894	0.538	0.723	0.802	0.568	0.491	0.512	0.836	0.612	0.598	0.607	0.542	0.646	0.562	0.727	0.426	0.681	0.79	0.81	0.457	0.358	0.525	0.62	0.62	0.678	0.968	0.533	0.797	1.094	0.31	0.576	0.31	0.633	0.31	0.628	0.622	0.776	0.642
1663	643.314	495.187738	497.1945689	261.129418	2.006830867	3850	1	1	0.844	1.846	0.803	1.549	0.745	0.857	0.34	0.816	1.098	1.152	1.038	0.806	0.474	0.698	0.942	1.211	1.04	0.797	0.856	1.191	0.548	0.881	0.886	0.832	0.535	0.855	0.865	0.528	0.59	1.116	0.428	2.309	2.516	1.056	0.634	0.878	1.016	0.757	0.75	0.22	0.573
1666	643.375	495.6875899	497.6944162	523.2585397	2.006826304	1838	2	2	0.611	3.8602016	0.759	2.092	1.221	1.729	0.849	1.405	0.868	1.184704965	1.268	0.515	0.22	0.971	0.775	1.634	2.39	1.28	0.577	1.560300348	0.22	1.415	0.949	1.54	0.805	1.497	1.058	1.274892143	0.97	1.7	0.53	3.135	4.137	1.14	0.482	2.017	1.212	1.560300348	0.962	1.560300348	0.792
1672	644.0414286	364.6245243	366.6313852	130.5662043	2.006860903	9279.142857	1	1	1.364	1.424	0.831	1.191	0.571	0.64	0.511	0.403	0.782	0.969203315	0.499	0.624964857	0.508	0.872	0.681	1.001	0.628	0.402	0.699	1.075872698	0.621	1.105	0.59	0.679	0.549	0.613	0.403	0.437	0.459	0.538	0.523	0.273	0.658	0.667	0.55	0.624	0.456	0.449	0.353	0.346	0.789
1674	644.426625	434.1744357	436.1807765	200.1161157	2.006340772	3294	1	1	0.41	0.373	0.576	0.442	0.539	0.314	7.138	4.649309437	0.645	0.632	0.886	0.64840476	0.492	0.312	0.748	0.607684259	0.799	0.342312164	0.866	0.519	0.426	0.256	0.283	0.312	1.11	0.942	0.622	0.73	0.846	0.757	0.452	0.8	0.349	0.352	0.329	0.618	0.39	0.315	0.446	0.446	0.886
1681	645.349	495.1855432	497.1922928	522.2544463	2.006749674	4026	2	2	0.787	1.999	0.597	1.447	0.779	1.071	0.304	0.868	0.949	1.154	1.096	0.76	0.341	0.745	0.843	1.108	1.226	0.887	0.711	1.166	0.394	1.235	0.893	1.104	0.63	1.336	1.039	0.599	0.458	1.284	0.38	2.904	2.683	1.452	0.507	0.99	1.054	0.799	0.76	0.22	0.577
1683	645.3992625	501.1145561	503.1209604	267.0562361	2.006404337	15268.125	1	1	0.889	1.207	0.863	0.769	0.824	0.705	0.704	0.652	1.511	0.823	0.864	0.979	1.016	0.767	0.896	1.198	0.423	0.645	0.876	0.75	1.259	1.048	1.117	0.824746766	1	0.406	0.709	0.66	0.707	0.5	0.785	1.74	1.319	0.821	0.626	0.401	0.437	0.748353654	0.541	0.748353654	0.385
1687	646.1481081	458.0722534	460.0787284	224.0139334	2.006475077	15954.56757	1	1	0.603	0.662	0.607	0.616	0.635	0.576	0.622	0.512	0.64	0.539	0.553	0.544	0.804	0.756	0.663	0.698	0.896	0.75	0.637	0.716	0.728	0.737	0.761	0.644	0.737	0.776	0.673	0.715	0.628	0.658	0.565	0.551	0.516	0.616	0.532	0.639	0.61	0.679	0.728	0.698	0.595
1697	647.3871781	503.1211773	505.1277955	269.0628573	2.00661819	12066.01714	1	1	0.572	0.158	0.698	0.259	0.123	0.155	0.146	0.158	0.1	0.108	0.1	0.1	0.105	0.145	0.105	0.152	0.194	0.258	0.117	0.1001	0.1	0.174	0.1	0.843	0.1	1.599	0.19	0.225	0.222	0.931	0.141	0.1001	0.17	0.317	0.25	0.908	0.639	0.1001	1.031	0.1001	1.173
1698	647.468	374.6145461	376.621492	140.5562261	2.006945948	4012	1	1	0.737	0.688	0.653	0.716	0.815	0.833	0.811	0.64	0.864	0.837	0.799	0.563	1.001	0.886	0.991	0.881	0.97	0.698	0.696	1.281	1.234	1.043	1.169	1.077	1.019	1.043	0.823	0.9	0.742	0.804	0.609	0.678	0.746	0.894338798	0.863	0.732	0.739	0.894338798	1.037	0.894338798	0.632
1699	647.8006372	364.6243493	366.6310307	261.1320585	2.006681436	60074.43721	2	2	1.279	1.421	1.182	1.175	0.597	0.61	0.454	0.425	1.122	0.973	0.581	0.566	0.526	0.6	0.79	0.927	0.46	0.582	0.959	1.097	0.741	0.738	0.651	0.71	0.46	0.607	0.354	0.409	0.43	0.478	0.445	0.303	0.756	0.743	0.659	0.801	0.513	0.492	0.376	0.363	0.446
1705	648.43	374.6144935	376.6213541	281.112347	2.006860647	5088	2	2	0.737	0.688	0.653	0.664	0.815	0.814	0.811	0.647	0.864	0.837	0.799	0.563	1.001	0.886	0.991	0.866	0.97	0.698	0.696	1.281	1.234	1.043	1.169	1.077	1.019	1.261	0.823	0.9	0.742	0.804	0.609	0.678	0.746	0.892169399	0.863	0.732	0.739	0.892169399	1.037	0.892169399	0.632
1712	650.4176502	438.1479977	440.154464	204.0896777	2.006466289	8705.262551	1	1	0.648	0.812	0.706	0.658	0.653	0.536	0.51	0.454	0.541	0.483	0.862	0.731	0.91	0.796	0.883	0.76	0.761	0.67	0.791	0.666	0.716	0.714	0.765	0.727	0.944	0.973	0.987	1.21	0.533	0.599	0.55	0.223	0.543	0.539	0.515	0.636	0.679	0.665	0.814	0.861	0.72
1713	650.679	306.1156828	308.1221795	72.05736284	2.006496635	6074	1	1	0.508	0.139	0.539	0.202	0.321	0.192	0.554	0.16	0.532	0.207	0.582	0.194	0.517	0.147	0.505	0.196	0.41	0.241	0.654	0.2	0.663	0.207	0.616	0.255	0.573	0.604	0.533	0.22	0.531	0.616	0.477	0.632	0.446	0.292	0.536	0.718	0.562	0.411	0.421	0.584	0.602
1714	651.0175	371.6416697	373.6486897	275.1666993	2.007020012	4808	2	2	0.304	0.282	0.903	0.846	0.489	0.483	0.602	0.511721669	0.573	0.318	0.271	0.236	0.365	0.455	0.375	0.329	0.739	0.483	0.703	0.969	0.161	0.128457777	0.184	0.157	1.411	1.528	0.321	0.482	0.636	0.773	0.362	0.271	0.816	0.717	0.68	0.919	0.231	0.191	0.318	0.388	1.839
1715	651.0407949	480.1615343	482.1681065	246.1032143	2.006572268	4744.679487	1	1	0.81	0.688	0.728	0.586	0.744	0.544	0.579	0.498	0.711	0.71	1.17	1.009	0.967	0.759	0.935	0.614	0.958	0.651	0.852	0.773	0.822	0.621	0.583	0.544	0.424	0.453	0.537	0.633	0.46	0.432	0.502	0.229	1.531	1.576	1.397	0.634	0.655	0.663	0.614	0.55	0.498
1716	652.0663156	335.1398979	337.1465935	101.0815779	2.00669556	15454.22897	1	1	0.681	0.726	0.863	0.915	0.951436	0.808	1.093	0.92	1.048	0.798	0.812	0.671	0.823	0.806	0.886	0.827	0.857	0.834	0.842	0.84	0.965	0.89	0.897	0.78	0.861	1.021	0.719	0.8	0.573	0.703	0.828	1.062	0.84	0.848	0.811	0.758	0.626	0.649	0.975	1.049	0.643
1717	652.548	748.2213757	752.2304209	281.1120357	4.009045285	1890	1	2	0.624	0.783	0.739	0.879	0.796	0.695	0.818	0.638	0.826	0.835	0.706	0.745	0.863	0.851	1.284	0.803	0.873	0.737	0.85	0.918917127	1.208	1.035	1.368	1.175	1.222	1.099	0.986	0.881	0.82	0.927	0.768	0.657	0.679	0.44	0.747	0.925	0.782	0.918917127	1.044	0.918917127	0.67
1718	652.767584	371.1401273	373.1467941	274.1636146	2.006666807	13541.136	2	2	0.269	0.566	0.734	0.851	0.428	0.579	0.61	0.485	0.461	0.411	0.272	0.269	0.368	0.403	0.359	0.377	0.669	0.421	0.64	0.58	0.108	0.1	0.123	0.143	1.265	1.559	0.315	0.383	0.583	0.625	0.363	0.292	0.838	0.76	0.586	0.814	0.214	0.193	0.329	0.409	1.691
1719	653.1043636	335.1418555	337.1486081	101.0835355	2.006752619	16866.54545	1	1	0.65	0.725	0.887	0.919	0.947	0.801	1.137	0.92	0.964	0.788	0.809	0.69	0.798	0.838	0.881	0.83	0.869	0.853	0.827	0.853	0.964	0.88	0.9	0.805	0.874	1.023	0.695	0.788	0.566	0.719	0.817	1.094	0.839	0.863	0.801	0.752	0.612	0.613	0.957	1.03	0.595
1720	653.6982485	378.1000992	380.106671	144.0417792	2.006571822	17080.48521	1	1	0.646	0.586	0.742	0.543	0.821	0.616	0.633	0.504	0.657	0.58	0.707	0.556	0.897	0.814	0.797	0.684	0.682	0.765	0.81	0.695	1.186	0.964	1.253	1.03	0.915	0.859	0.725	0.827	2.426	2.608	0.683	0.914	0.654	0.695	0.602	0.74	0.626	0.637	0.969	1.038	0.63
1722	655.3057	363.1364474	365.144192	129.0781274	2.007744561	3259.9	1	1	0.647	1.569	0.559	0.353	0.662	1.02	0.839	0.235	0.592	0.342	0.757	0.461	0.699	0.425	0.833	0.953	0.461	0.452	0.766	0.776	0.725	0.449	0.842	0.579	0.77	0.581	0.64	1.248	0.486	0.54	1.025	0.522	0.841	0.683	0.708	0.565	0.503	0.505	0.641	0.606	0.57
1728	657.165	379.168219	381.1750488	145.109899	2.006829803	3143	1	1	0.692	0.557	1.859	1.776	1.248	1.25	0.663	0.528	1.12	1.087	0.593	0.422	0.792	0.638	0.448	0.322	0.11	0.761	0.48	0.554	1.095	1.002	0.676	0.486	0.649	0.472	0.285	0.396	1.549	1.814	1.251	0.616	0.399	0.323	0.346	0.814	0.478	0.495	0.11	0.11	0.11
1731	657.7254717	503.0572499	505.0635096	268.9989299	2.006259721	6979.462264	1	1	0.836	0.801	0.976	0.794	1.104	0.832	0.9	0.743	1.006	0.826	0.936	0.745	1.286	1.011	1.133	0.948	0.941	1.083	0.968	0.817	1.462	1.226	1.417	1.22	1.465	1.25	1.089	1.218	1.271	1.18	0.815	0.607	0.986	1.075	0.95	1.136	0.653	0.692	1.074	1.094	1.037
1732	657.734	457.0632508	459.0699993	446.0098616	2.006748455	4008	2	2	0.627	0.417	0.598	0.667	0.602	0.586	0.543	0.515	0.617	0.511	0.486	0.652	0.988	0.369	0.529	0.512	0.757	0.604	0.788	0.635	0.631	0.633	0.735	0.661	0.512	0.544	0.698	0.65	0.558	0.497	0.43	0.447	0.527	0.788	0.58	0.55	0.528	0.833	0.557	1.241	0.476
1733	659.9966667	454.1430023	456.149365	220.0846823	2.00636269	12052.66667	1	1	0.357	0.363	2.361	2.015	0.529	0.503	1.222	1.131	0.482	0.446	0.408	0.356	1.211	1.091	0.493	0.437	0.659	0.466	0.762	0.684	0.111	0.113	0.217	0.179	1.611	1.723	0.408	0.333	1.408	1.32	0.403	0.622	1.815	1.722	1.63	0.695	0.47	0.506	0.725	0.767	1.481
1734	660.068949	328.1217861	330.1284121	188.1269321	2.006626066	11520.88776	2	2	0.505	0.639	1.398	1.302	0.795	0.707	0.873	0.673	1.111	0.837	0.971	0.68	0.726	0.654	1.207	1.228	0.85	1.367	0.789	0.765	0.833	0.711	0.489	0.448	1.218	1.349	0.852	1.09	0.487	0.607	0.868	0.467	1.215	1.162	0.878	0.601	1.043	1.184	1.022	1.13	1.488
1735	660.5188222	337.1211185	339.1276442	103.0627985	2.006525701	14265.28889	1	1	0.436	0.804	0.35	0.388	0.244	0.441	0.662	0.514	0.6	0.373	0.427	0.35	0.486	0.55	0.516	0.464	1.281861492	0.408	0.596	0.624	0.44	0.436	0.575	0.421	0.393	0.469	0.4	0.545	0.37	0.544	0.486	0.533	0.568	0.621	0.37	0.394	0.41	0.444	0.479	0.548	0.431
1736	660.7593832	448.1896921	450.196223	214.1313721	2.00653083	47424.57009	1	1	0.56	0.46	0.641	0.464	0.631	0.449	0.54	0.46	0.523	0.536	1.226	1.038	0.748	0.669	0.64	0.509	0.686	0.382	0.733	0.683	0.55	0.433	0.428	0.338	0.426	0.421	0.403	0.428	0.744	0.77	0.411	0.274	0.963	0.855	0.965	0.599	0.552	0.493	0.361	0.366	0.425
1740	661.7902786	336.089467	338.0959984	102.031147	2.006531441	8427.742504	1	1	0.617	0.582	0.657	0.538	0.753	0.656	1.186	1	1.425	1.212	1.196	1.187	1.315	1.318	1.314	1.141	0.334	1.119	1.398	1.283	0.9	0.872	0.57	0.505	1.468	1.61	1.146	1.518	0.728	0.921	1.429	2.937	0.502	0.485	0.483	0.809	0.227	0.234	1.468	1.344	1.057
1742	662.9742	481.2004456	483.2057446	247.1421256	2.005298925	2444.4	1	1	2.269	1.064	3.606	0.989	1.122	0.828	0.458	0.533	0.484	0.873	1.995	1.25	2.093	1.218	1.538	0.722	1.72613615	0.69	0.383	1.136	2.115	1.343	2.724	1.165	1.54	0.759	1.888	1.308	3.313	2.325	0.461	1.495	0.902	0.846	1.416	1.872	0.332	0.509	0.49	0.459	0.562
1744	664.4121818	600.1656088	602.1725738	366.1072888	2.00696502	9736.181818	1	1	0.235	0.281	0.213	0.228	0.206	0.211	0.244	0.18	0.235	0.177	0.207	0.18	0.204	0.185	0.29	0.243	0.213971831	0.215	0.236	0.28	0.278	0.264	0.271	0.162	0.216	0.216	0.134	0.16	0.155	0.163	0.282	0.192	0.271	0.267	0.219	0.208	0.285	0.284	0.34	0.325	0.184
1745	664.726907	599.162446	603.175069	132.053106	4.012622946	2871.627907	1	2	2.071	2.335	2.164	2.223	2.392	1.817	2.082	1.63	2.27	1.678	1.712	1.627	2.053	2.333	2.539	2.306	1.981873832	2.217	2.579	2.409	2.167	2.143	2.392	2.08	2.201	2.039	1.54	1.674	1.227	1.462	2.104	1.639	2.639	2.3	2.288	1.914	2.738	2.543	3.376	3.315	1.978
1747	665.9286092	438.1477933	440.1543572	204.0894733	2.006563976	3748.62949	1	1	0.656	0.747	0.714	0.667	0.685	0.543	0.513	0.475	0.583	0.492	0.885	0.76	0.916	0.809	0.868	0.778	0.737	0.709	0.803	0.729	0.728	0.718	0.773	0.685	0.937	0.994	0.981	1.224	0.522	0.603	0.564	0.234	0.546	0.562	0.516	0.656	0.684	0.678	0.828	0.85	0.719
1749	666.1667952	367.0776272	369.0840615	133.0193072	2.006434311	25316.2381	1	1	0.451	0.803	0.381	0.359	0.754	1.182	0.368	0.437	0.402	0.56	0.506	0.565	0.522	0.887	0.577	0.758	0.18	0.624	0.526	0.943	0.589	1.39	0.84	1.484	0.357	0.279	0.456	0.632	0.404	0.773	0.408	0.4	0.716	0.641	0.512	0.463	0.363	0.341	0.382	0.386	0.378
1750	666.6915714	335.1398784	337.1466232	101.0815584	2.0067448	15463.71429	1	1	0.667	0.722	0.901	0.9	0.852	0.807	1.126	0.915	0.964	0.799	0.83	0.682	0.774	0.804	0.896	0.834	0.872	0.831	0.88	0.844	0.925	0.888	0.925	0.78	0.83	1.001	0.69	0.791	0.578	0.717	0.842	1.189	0.895	0.875	0.835	0.753	0.614	0.622	0.981	1.03	0.602
1751	666.858	279.1163081	281.1230347	45.05798808	2.006726648	7566	1	1	1.382	0.565	1.001	0.784	1.486	0.896	9.99	0.624	1.291	0.787	0.86	0.67	1.15	0.831	1.735	0.59	9.99	0.666	1.911	0.744	9.99	0.803	2.448	1.239	1.795	0.792	1.18	2.293	1.57	1.518	1.509	1.102	1.451	2.792	1.23	1.422	1.468	1.32	1.086	2.021	0.833
1752	666.8792857	397.1238375	399.1295812	163.0655175	2.005743727	3465.142857	1	1	0.409	0.387	0.786	0.511	0.544	0.462	0.484	0.674	0.295	0.349	0.52	0.446	0.541802261	0.464	2.139	2.028	0.617776442	0.363	1.594	1.398	0.582	0.765	0.559	0.554	1.371	1.01	0.628	0.611	0.5	0.686	1.4	0.56	0.309	0.321	0.379	0.714	0.253	0.285	0.706	0.525	0.317
1754	667.4545	428.1277917	430.1337978	194.0694717	2.006006097	2961	1	1	0.564	0.562	0.514	0.482	0.623	0.497	0.858	0.867	0.667	0.542	0.741	0.567	0.702	0.593	0.526	0.368	0.879406542	0.896	0.553	0.426	1.169	0.919	0.989	0.774	0.881	0.85	0.749	1.022	1.109	0.975	0.546	0.588	0.495	0.449	0.489	0.444	0.75	0.84	0.665	0.701	0.869
1756	668.1355251	390.1113429	392.1178959	156.0530229	2.006552984	33533.84958	1	1	0.653	0.325	0.495	0.211	0.215	0.262	0.308	0.263	0.226	0.286	0.21	0.256	0.218	0.338	0.251	0.285	0.247	0.303	0.281	0.263	0.271	0.279	0.3	0.246	0.199	0.277	0.139	0.162	0.154	0.165	0.25	1.118	0.281	0.284	0.324	0.305	0.274	0.264	0.406	0.417	0.186
1758	670.2683333	311.5927874	313.5995413	155.0689347	2.006753937	3070	2	2	0.318	0.251	0.633	0.144	0.17	0.221	0.443	0.145197116	0.322	0.238	0.485	0.194	0.461	0.32	0.17	0.195	0.17	0.288	0.37	0.21	0.17	0.257	0.241	0.173	0.323	0.513	0.304	0.467	0.17	0.307	0.323	0.214	0.523	0.483	0.445	0.43	0.528	0.644	0.579	0.576	0.54
1759	670.3988756	378.1001371	380.1066386	144.0418171	2.006501531	12440.56995	1	1	0.64	0.674	0.742	0.611	0.814	0.642	0.65	0.562	0.672	0.528	0.701	0.591	0.858	0.838	0.787	0.724	0.686	0.802	0.789	0.749	1.187	0.933	1.244	1	0.913	0.886	0.725	0.891	2.427	2.624	0.673	0.874	0.657	0.677	0.603	0.73	0.62	0.634	0.959	1.01	0.635
1760	671.0893121	369.6402405	371.6469309	271.163841	2.006690381	5252.184397	2	2	0.976	1.147	0.883	1.007	0.673	0.602	0.734	0.714	0.685	0.593	1.113	1.001	0.76	0.797	0.693	0.71	1.063	0.601	0.871	0.991	0.375	0.377	0.415	0.31	0.47	0.72	0.305	0.321	0.549	0.585	0.362	0.937	1.544	1.883	1.447	0.499	0.62	0.612	0.639	0.593	0.498
1761	671.1914615	394.0950236	396.1018509	160.0367036	2.006827341	3779.884615	1	1	0.584	0.472	0.776	0.461	0.812	0.489	0.566	0.376	0.7	0.51	0.755	0.449	0.793	0.711	0.719	0.536	0.48	0.566	0.685	0.548	1.138	0.918	1.288	0.916	0.77	0.731	0.727	0.59	2.088	1.923	0.656	1.443	0.536	0.512	0.675	0.788	0.57	0.66	0.867	0.893	0.523
1763	672.9048077	515.0935487	517.0995122	281.0352287	2.005963508	2383.846154	1	1	1.212	1.206	1.146	1.404	1.179	1.007	1.233	0.988	0.764	0.72	1.056	1.754	1.269	1.474	1.307	1.769	2.847	1.882	1.226	1.818	0.987	0.76	0.773	0.8	1.311	1.874	1.454	2.346	1.123	1.302	1.006	2.229	1.295	1.15	0.977	1.031	0.792	0.807	1.279	1.27	1.515
1764	674.2768182	614.0496143	616.0552549	759.9825885	2.005640618	3019	2	2	2.431	3.085	5.701	7.943	6.703	2.702	0.865	1.464	1.327	3.418	7.549	5.192	5.738	2.745	6.224	3.757	1.81	2.666	1.461	1.55	3.71	6.35	4.536	5.65	9.99	4.709	9.99	7.501	7.219	8.144	0.938	2.628	2.768	2.158	4.963	8.474	0.941	3.55328541	1.473	0.93	1.5
1766	675.1103333	694.2161179	696.2225863	460.1577979	2.006468388	1824.666667	1	1	0.457	0.448	0.799	0.747	0.971	0.878	0.52	0.781	0.948	0.925	0.606	0.437	0.713	0.309	0.74	0.51	0.712	1.302	0.88	0.855	1.094	0.981	0.699	0.64	0.839	0.801	0.955	0.969	0.605	0.581	0.509	0.335	0.594	0.698	0.709	0.573	0.595	0.609	1.198	1.204	0.672
1767	675.146	429.1475223	431.1543112	195.0892023	2.006788817	2668	1	1	1.235	1.218	0.52	0.508159525	0.46	0.52	0.49	0.49	0.713	0.396	1.354	1.368	0.614	0.574	0.651	0.53	0.931	0.382	0.805	1.046	0.56	0.547	0.557	0.435	0.653	0.703	0.469	0.343	0.517	0.454	0.726	0.417	0.49	0.298	0.49	0.372	0.915	0.493	0.961	1.125	2.463
1768	675.189	874.4362781	876.4430987	1280.755916	2.006820547	18108	2	2	0.911	0.934	1.518	1.506	0.988	1.124	0.695	0.702	1.151	1.054	1.044	1.083	0.677	0.821	1.05	1.248	0.917	1.193	1.134	1.151	1.384	1.511	1.395	1.193	1.335	1.62	1.375	1.539	0.49	0.666	0.856	1.701	0.777	0.839	0.816	1.029	0.912	0.943	1.482	1.699	1.485
1770	676.0568	336.0892727	338.0960106	102.0309527	2.006737908	4277.2	1	1	0.625	0.46	0.642	0.516	0.743	0.627	1.116	0.893	1.401	0.983	1.201	1.002	1.31	1.056	1.314	0.907	0.327	0.881	1.445	1.07	0.93	0.696	0.568	0.431	1.475	1.54	1.14	1.353	0.775	0.893	1.363	3.012	0.503	0.485	0.483	0.805	0.227	0.234	1.468	1.332	1.057
1773	677.1635	364.6246373	366.6315267	261.1326345	2.006889463	5595	2	2	1.309	1.692	0.902	0.433	0.568	0.427	0.504	0.46	0.83	0.355	0.542	0.524	0.504	0.495	0.671	0.561	0.652	0.37	0.724	0.444	0.665	0.774	0.672	0.487	0.577	0.957	0.454	0.538	0.512	0.599	0.532	0.281	0.684	0.674	0.612	0.601	0.481	0.478	0.404	0.431	0.658
1775	677.4595517	698.2849155	700.2910835	464.2265955	2.006167969	3884.068966	1	1	0.155	0.153	0.1	0.157	0.1	0.1	0.355	0.263	0.1	0.1	0.1	0.1	0.1	0.1	0.1	0.1	1.568	0.169	0.1	0.105	0.1	0.1	0.1	0.1	0.1	0.14	0.1	0.1	0.17	0.1	0.1	0.222	0.1	0.129	0.1	0.1	1.607	1.526	1.885	1.875	1.751
1776	677.8904286	595.6071166	597.6126627	361.5487966	2.005546083	6093.714286	1	1	1.345	1.77	2.309	2.472	1.645	1.614	1.132	1.143	1.777	1.658	1.664	1.659	1.12	1.33	1.349	1.967	1.337	2.084	1.679	1.915	1.649	1.873	1.845	1.933	1.903	2.458	1.995	2.363	0.789	1.098	1.247	2.633	1.419	1.239	1.238	1.625	1.524	1.515	2.163	2.317	2.298
1777	678.015499	874.4360382	876.4426115	640.3777182	2.006573309	25360.25416	1	1	0.911	0.98	1.518	1.506	0.986	1.124	0.701	0.697	1.151	1.033	1.044	1.074	0.677	0.821	1.05	1.235	0.917	1.188	1.134	1.151	1.384	1.511	1.395	1.176	1.335	1.646	1.375	1.528	0.49	0.666	0.856	1.701	0.777	0.839	0.816	1.029	0.912	0.943	1.482	1.699	1.485
1780	678.6682	327.6061534	329.6127091	187.0956667	2.006555766	2572.2	2	2	1.39	1.013	1.132	0.623	1.13	1.018	0.274	0.335	1.032	0.821	1.686	1.647	0.677	0.6	0.667	0.648	1.858	1.21	1.133	1.309	0.349	0.383	0.59	0.574	0.57	0.703	0.291	0.248	0.233	0.222	0.434	0.446	0.333	0.349	0.385	0.899	1.718	1.61	0.37	0.37	0.781
1781	679.187	559.7471164	561.7546664	651.3775929	2.007549976	6890	2	2	1.049	0.953	1.677	1.451	0.926	1.013	0.586	0.69	1.019	1	0.99	1.008	0.671	0.745	0.873	1.285	0.863	1.151	0.983	1.18	1.247	1.471	1.228	0.92	1.214	1.6	1.069	1.502	0.372	0.652	0.709	2.379	0.796	0.726	0.692	0.937	0.752	0.905	1.356	1.278	1.027
1782	679.4111667	304.0999441	306.1067314	70.04162412	2.006787285	7734.333333	1	1	0.522	0.514	0.604	0.396	0.384	0.385	0.401	0.373	0.926	0.371	0.445	0.429	0.39	0.567	0.553	0.544	0.462	0.49	0.337	0.583	0.873	0.48	0.589	0.331	0.515	0.467	0.444	0.503	0.358	0.307	0.453	0.348	0.19	0.447	0.523	0.527	0.715	0.629	0.491	0.675	0.19
1783	679.7716957	674.2254863	676.2318592	440.1671663	2.006372937	3450.637681	1	1	0.569	0.638	0.927	0.982	1.465	1.1	1.002	0.844	0.988	1.043	0.913	0.857	1.335	1.274	0.802	0.834	0.873	1.198	0.841	0.73	0.983	0.991	1.179	0.999	0.698	0.843	1.172	1.153	0.907	1.017	0.856	0.529	0.371	0.389	0.339	1.16	1.226	1.052	0.843	0.902	1.669
1785	679.962	364.6250198	366.6316055	130.5666998	2.00658564	8032	1	1	1.315	1.642	0.86	0.433	0.568	0.458	0.503	0.459	0.837	0.43	0.536	0.533890488	0.494	0.444	0.664	0.561	0.652	0.35	0.695	0.542059412	0.654	0.791	0.667	0.491	0.584	0.957	0.453	0.538	0.516	0.605	0.543	0.281	0.679	0.67	0.608	0.588	0.482	0.478	0.401	0.431	0.649
1786	680.303	349.1231389	351.1325917	115.0648189	2.009452762	2452	1	1	0.633	0.463	0.634	0.499	0.605	0.495	0.625	0.597	0.713	0.393	0.667	0.592	0.614	0.55	0.605	0.622	0.629	0.679	0.658	0.500088248	0.631	0.741	0.524	0.35	0.454	0.36	0.533	0.406	0.455	0.423	0.34	0.401	1.193	1.061	1.217	0.598	0.517	0.489	0.432	0.394	0.452
1791	682.5790526	559.7470703	561.7537484	325.6887503	2.006678028	12092.28947	1	1	1.049	0.958	1.677	1.446	0.926	0.994	0.586	0.697	1.019	1.029	0.99	0.932	0.671	0.763	0.873	1.116	0.829	1.198	0.983	1.018	1.247	1.468	1.228	1.066	1.214	1.56	1.069	1.468	0.372	0.652	0.709	2.379	0.796	0.726	0.692	0.937	0.752	0.905	1.356	1.296	1.027
1793	682.7644158	559.2457331	561.2523631	325.1874131	2.006630081	19819.22772	1	1	0.871	0.827	1.584	1.35	0.814	0.989	0.604	0.683	0.966	0.913	0.894	0.913	0.736	0.765	0.862	1.053	0.609	1.108	0.957	1.065	1.15	1.314	1.227	1.008	1.122	1.42	1.121	1.222	0.375	0.564	0.649	2.199	0.74	0.686	0.77	0.895	0.813	0.746	1.259	1.125	1.002
1795	683.2138028	418.131365	420.1378289	184.073045	2.006463926	4332.323944	1	1	0.733	0.81	0.755	0.778	0.88	0.631	0.79	0.597	0.908	0.802	0.629	0.558	1.352	1.016	1.15	0.905	0.849	0.793	0.655	0.722	1.339	1.317	1.264	0.891	0.702	0.632	0.834	0.852	0.754	0.772	1.065	0.997	0.771	0.778	0.671	0.623	0.605	0.528	1.315	1.107	0.775
1796	683.294	507.0076989	509.0095216	272.9493789	2.001822784	4069	1	1	1.635	1.794607389	1.817	1.829	1.771	1.401	1.968	1.893	1.801	1.758812797	1.802	1.607	1.902	2.319	1.874	0.955	1.761	2.061	1.89	1.133	1.708	1.912	1.781	1.804	1.663	1.956	1.797	2.063	2.036	1.915	1.76	1.916	1.796	1.66	1.9	1.849	1.787	1.948	1.864	1.992	1.789
1800	685.224	457.0629947	459.0689254	446.0093494	2.005930705	3366	2	2	0.63	0.695	0.549	0.739	0.532	0.657	0.49	0.546	0.639	0.529	0.48	0.709	1.041	0.928	0.547	0.543	0.711	0.648	0.785	0.678	0.537	0.713	0.716	0.782	0.491	0.55	0.832	0.695	0.526	0.504	0.402	0.439	0.59	0.797	0.594	0.579	0.555	0.655059166	0.578	1.241	0.463
1801	685.7721429	315.090249	317.0971067	162.063858	2.006857695	3239.142857	2	2	1.555	1.23	1.142	1.011	1.026	1.416	0.983	1.178	0.757	1.34	1.069	1.301	0.969	1.066	1.2	1.814	1.426	2.813	1.287	1.794	1.413	1.679	1.211	0.831	1.412	1.87	0.934	0.93	0.539	0.659	1.041	5.127	0.812	0.721	0.988	1.18	1.112	1.198	2.139	1.894	0.936
1802	686.1966792	552.179025	554.1853144	318.120705	2.006289403	2890.528302	1	1	0.346	0.554	1.559	1.394	1.18	0.789	1.166	1	0.46	0.329	0.779	0.513	1.719	1.24	1.443	1.378	0.481	1.231	3.034	3.234	2.486	2.311	1.003	0.945	0.845	0.813	0.609	0.472	0.474	0.679	0.57	0.335	0.718	0.472	0.624	1.074	0.322	0.14	1.634	1.911	0.781
1804	686.363	457.0621139	459.0690533	223.0037939	2.006939385	3254	1	1	0.644	0.685	0.562	0.735	0.52	0.661	0.551	0.546	0.644	0.529	0.48	0.719	1.041	0.928	0.555	0.541	0.719	0.648	0.789	0.678	0.559	0.713	0.718	0.782	0.505	0.55	0.824	0.699	0.546	0.507	0.402	0.439	0.584	0.942	0.586	0.573	0.562	0.656341424	0.577	0.54	0.457
1808	686.387	383.0824891	385.0896951	298.0483381	2.007206022	8698	2	2	0.529	0.396	0.784	0.565	0.783	0.518	0.429	0.408	0.689	0.215	0.901	0.295	0.808	0.539	0.907	0.556	1.202	0.484	0.701	0.56	0.812	0.349	1.093	0.844	0.81	0.764	0.773	0.424	0.647	0.892	0.559	0.514	0.698	0.724	0.583	0.904	1.258	1.294	0.919	0.964	1.028
1809	686.451	383.0797795	385.0877183	298.042919	2.007938789	6654	2	2	0.532	0.981	0.834	1.074	0.792	0.906	0.422	0.681	0.688	0.516	0.901	0.712	0.806	1.242	0.911	1.211	1.202	0.965	0.709	1.209	0.812	1.273	1.132	1.687	0.81	1.081	0.771	0.714	0.652	0.869	0.561	0.53	0.672	0.628	0.583	0.894	1.258	1.32	0.927	0.95	1.028
1814	687.0091556	382.5808055	384.5873865	148.5224855	2.00658106	11062.44444	1	1	0.488	0.977	0.732	0.961	0.698	0.846	0.415	0.601	0.653	0.432	0.781	0.624	0.728	1.15	0.767	1.083	1.146	0.975	0.608	1.193	0.688	1.089	0.987	1.4	0.708	1.003	0.709	0.676	0.597	0.776	0.507	0.461	0.676	0.677	0.529	0.791	1.136	1.118	0.794	0.784	1.007
1815	687.338037	371.6319232	373.6386776	137.5736032	2.006754327	9150.592593	1	1	0.751	0.84	1.343	1.289	0.602	0.589	0.626	0.587	0.888	0.999	0.633	0.608	0.528	0.547	0.855	0.863	0.56	0.59	0.738	0.724	0.678	0.644	0.714	0.622	0.722	0.808	0.406	0.431	0.485	0.607	0.481	0.224	0.624	0.671	0.567	0.78	0.536	0.538	0.652	0.692	0.495
1816	687.454	372.1345438	374.1417436	138.0762238	2.007199803	7608	1	1	0.793	0.796567907	1.437	0.856	0.676	0.581803007	0.678	0.405	0.924	0.535576624	0.611	0.473776234	0.577	0.498	0.809	0.552640562	0.624	0.371	0.733	0.771154803	0.671	0.514794884	0.718	0.657686639	0.766	0.457	0.447	0.358	0.533	0.653	0.501	0.25	0.726	0.67	0.578	0.807	0.544	0.533	0.727	0.779	0.527
1817	687.478	383.0797692	385.0867869	149.0214492	2.007017693	18568	1	1	0.529	0.981	0.766	1.074	1.203	0.906	0.402	0.681	0.704	0.549	0.903	0.712	0.795	1.242	0.78	1.211	1.264	0.965	0.693	1.209	0.836	1.273	1.085	1.687	0.805	1.081	1.279	0.714	0.673	0.835	0.642	0.512	0.679	0.571	0.593	0.898	1.269	1.136	0.927	0.955	1.022
1819	687.7146316	370.6482352	372.6547605	273.1798305	2.006525301	2469.578947	2	2	0.16	0.16	0.16	0.16	0.16	0.16	0.26	0.311	0.16	0.203	0.16	0.16	0.16	0.16	0.16	0.16	1.895	0.244	0.16	0.16	0.16	0.16	0.16	0.16	0.246	0.208	0.16	0.16	0.16	0.16	0.16	0.278	0.16	0.194	0.16	0.16	2.289	2.177	5.544	5.284	1.809
1821	688.16	559.2452311	561.2518362	650.3738222	2.006605146	3249.5	2	2	0.871	0.872	1.584	1.337	0.804	1.002	0.604	0.692	0.966	0.977	0.894	0.994	0.736	0.712	0.846	1.035	0.609	1.074	0.957	1.053	1.15	1.315	1.227	1.055	1.122	1.467	1.121	1.264	0.375	0.564	0.649	2.199	0.74	0.686	0.77	0.895	0.813	0.746	1.259	1.125	0.986
1822	688.19075	396.1365784	398.1428365	162.0782584	2.006258105	2288.5	1	1	1.732	1.184	1.193	1.13	0.974	1.279	1	1.029	1.067	1.277	1.215	1.192	1.026	1.025	1.08	1.242	0.39	1.02	1.189	1.515	0.21	0.21	0.47	0.349	1.689	1.887	0.975	1.144	0.682	0.966	0.873	2.077	0.614	0.589	0.642	0.848	0.353	0.397	0.422	0.367	0.294
1824	688.436	754.2116734	756.2180428	520.1533534	2.006369365	1600	1	1	0.27	0.27	1.005	0.955	1.995	1.843	1.871	1.494	0.358	0.549	0.27	0.27	0.628	0.75	0.834	0.87	0.646	2.34	1.266	1.602	0.748	0.928	1.678	1.487	2.258	1.972	2.008	1.357	0.27	0.27	0.314	0.343	0.921	0.9	1.122	0.539	0.487	1.141856867	0.68	1.141856867	0.27
1825	688.485	372.1341717	374.1409988	276.1517034	2.00682707	10032	2	2	0.793	0.892	1.437	1.412	0.676	0.475	0.678	0.523	0.988	0.3	0.611	0.606	0.577	0.509	0.809	0.311	0.624	0.502	0.733	0.525	0.671	0.244	0.718	0.709	0.766	0.65	0.447	0.451	0.533	0.653	0.501	0.25	0.726	0.67	0.578	0.807	0.544	0.533	0.727	0.779	0.527
1826	688.529	383.0823873	385.0897732	149.0240673	2.007385945	11828	1	1	0.529	0.396	0.784	0.697	0.783	0.42	0.429	0.408	0.689	0.215	0.901	0.295	0.808	0.539	0.907	0.556	1.202	0.484	0.701	0.56	0.812	0.349	1.093	0.574	0.81	0.764	0.773	0.424	0.647	0.892	0.559	0.514	0.698	0.724	0.583	0.904	1.258	1.31	0.919	0.964	1.028
1827	688.9861176	565.269207	567.2748795	331.210887	2.00567251	4961.529412	1	1	0.645	0.726	1.927	1.772	1.038	0.805	0.596	0.594	0.593	0.539495138	0.591	0.417	1.331	1.054	0.83	0.759	0.678	0.479	0.705	0.703	0.11	0.11	0.28	0.447	1.323	1.206	0.704	0.665	0.551	0.625	0.691	0.438	0.824	0.775	0.813	1.325	0.703	0.675	0.732	0.819	0.47
1836	690.519	641.2890944	643.2954798	407.2307744	2.006385435	7762	1	1	1.648	2.154	2.194	3.185	1.71	2.726	1.012	2.34	1.521	0.71	1.714	1.011	0.976	1.601	1.145	2.471	1.361	2.305	1.829	2.471	2.442	4.825	1.36	2.096	2.068	4.279	3.247	1.674	0.97	1.691	1.878	3.495	1.269	1.246	1.403	1.603	1.678	1.559	2.03	1.911	2.227
1837	690.547	376.1685989	378.1747948	142.1102789	2.006195834	1978	1	1	0.578	0.606295214	0.578	0.5	0.38	0.38	1.337	1.061	0.543	0.523	2.344	1.616	0.38	0.38	1.257	0.944	0.849	1.11	0.38	0.542	0.797	0.76	0.38	0.38	0.719	0.648	0.38	0.38	0.38	0.38	0.38	0.38	0.643	0.523	0.468	0.647	1.586	1.907	0.77	0.527	0.491
1838	690.6643782	640.7877341	642.7942615	406.7294141	2.006527432	7545.21579	1	1	1.636	1.767	2.03	2.731	1.756	2.518	1.051	2.13	1.39	0.673	1.649	1.064	0.793	1.503	1.084	1.825	1.182	1.937	1.58	2.247	2.599	4.031	1.159	1.908	1.709	3.617	2.692	1.597	0.805	1.988	1.695	3.387	1.265	1.204	1.336	1.434	1.533	1.564	1.757	1.848	2.021
1841	691.014	457.0625533	459.0687977	446.0084666	2.006244373	2900	2	2	0.624	0.682	0.592	0.741	0.498	0.664	0.576	0.552	0.63	0.546	0.508	0.72	1.041	0.928	0.464	0.542	0.732	0.654	0.802	0.694	0.562	0.718	0.735	0.789	0.491	0.554	0.873	0.706	0.572	0.497	0.418	0.453	0.622	0.942	0.624	0.592	0.551	0.654248807	0.562	0.54	0.455
1843	691.48	641.2893494	643.2956865	814.4620587	2.006337124	6612	2	2	1.648	2.154	2.194	3.185	1.71	2.726	1.012	2.34	1.521	0.71	1.714	1.011	0.976	1.601	1.145	2.397	1.361	2.305	1.829	2.471	2.442	4.825	1.36	2.096	2.068	4.279	3.247	1.674	0.97	1.691	1.878	3.495	1.269	1.246	1.403	1.603	1.678	1.559	2.03	1.911	2.283
1845	691.558	335.1421909	337.1489131	101.0838709	2.006722226	51376	1	1	0.642	0.423	0.867	0.652	0.906	0.429	1.146	0.501	0.937	0.355	0.811	0.33	0.779	0.442	0.877	0.382	0.852	0.407	0.849	0.453	0.954	0.417	0.902	0.436	0.874	0.724	0.674	0.533	0.538	0.7	0.817	1.119	0.82	0.846	0.79	0.741	0.599	0.6	0.924	1.02	0.588
1848	691.8365	431.0738339	433.0794098	394.0310277	2.005575954	1905	2	2	0.719	0.525	0.723	1.151	0.715	0.792	0.566	0.653	0.734	0.652	0.997	0.566	0.766	1.067	0.858	1.333	0.935	1.082	0.566	0.897765614	0.758	1.04	0.959	1.2	0.836	0.728	0.626	0.891	0.548	0.794	0.539	0.62	0.661	0.738	0.514	0.768	1.178	1.175	0.865	0.738	1.012
1850	691.9012326	371.6322046	373.6388931	275.1477691	2.00668855	126275.6744	2	2	0.751	0.811	1.343	1.3	0.602	0.589	0.625	0.593	0.884	0.829	0.633	0.58	0.528	0.537	0.855	0.773	0.56	0.581	0.738	0.716	0.678	0.612	0.71	0.634	0.722	0.812	0.405	0.412	0.485	0.607	0.481	0.224	0.624	0.671	0.567	0.78	0.536	0.538	0.652	0.692	0.495
1851	691.9055417	743.2595296	747.2727576	276.1501896	4.013228036	2477.333333	1	2	0.828	0.843	1.443	1.164	0.678	0.729	0.651	0.673	0.917	0.853	0.679	0.668	0.518	0.702	0.838	0.977	0.731	0.696	0.733	0.824	0.65	0.705	0.705	0.615	0.787	1.023	0.417	0.49	0.506	0.699	0.655	0.383	0.65	0.714	0.607	0.752	0.562	0.516	0.796	0.642553833	0.554
1852	691.9293	390.6039567	392.6108452	313.0912734	2.006888451	2401.8	2	2	0.778	0.824	1.256419536	1.001	0.905609473	0.639	0.483	0.552	0.807	0.778	0.498	0.511	0.618	0.679	0.934	0.81	0.463	0.744	0.622	0.842	0.703	0.69	0.826276469	0.546	0.499	0.823	0.431763928	0.432	0.359287331	0.672	0.49	0.271	0.514	0.482	0.499	0.734	0.552	0.7	0.446	0.17	0.441
1853	692.0322944	363.1367758	365.1433545	129.0784558	2.006578668	569579.2897	1	1	0.479	0.567	0.795	0.814	0.78	0.727	0.838	0.737	0.724	0.764	1.059	1.129	0.588	0.523	0.97	0.887	0.728	1.021	1.15	1.218	1.488	1.481	1.206	0.98	0.919	0.963	1.008	1.358	0.334	0.396	0.88	0.749	0.896	0.9	0.91	0.874	0.559	0.549	0.624	0.647	0.872
1854	692.0541179	383.5802802	385.5867628	299.0439203	2.00648266	56411.47692	2	2	0.517	0.972	0.794	1	0.753	0.873	0.428	0.655	0.698	0.543	0.814	0.653	0.776	1.156	0.848	1.192	1.157	0.968	0.627	1.206	0.747	1.199	1.031	1.599	0.756	1.03	0.741	0.768	0.615	0.795	0.561	0.502	0.676	0.702	0.565	0.827	1.217	1.174	0.879	0.863	1.056
1855	692.064522	531.1029937	533.1087928	297.0446737	2.005799106	5849.408805	1	1	0.625	0.852	0.897	0.999	0.794	0.813	0.427	0.646	0.702	0.578	0.944	0.624	0.778	1.135	0.908	1.152	1.09	1.037	0.703	1.229	0.76	1.187	1.133	1.526	0.744	0.985	0.736	0.786	0.687	0.814	0.544	0.511	0.668	0.716	0.583	0.848	1.257	1.323	0.887	0.766	0.888
1856	692.0848738	382.5808282	384.5874347	297.0450164	2.006606506	267604.3738	2	2	0.488	0.914	0.732	0.94	0.698	0.83	0.415	0.595	0.653	0.498	0.781	0.606	0.729	1.124	0.766	1.134	1.146	0.896	0.608	1.113	0.688	1.115	0.987	1.557	0.718	0.977	0.692	0.706	0.597	0.776	0.507	0.466	0.676	0.677	0.529	0.797	1.136	1.118	0.794	0.784	1.007
1857	692.089	401.554251	403.5607809	334.9918619	2.006529894	3733.614286	2	2	0.554	0.991	0.819	0.919	0.729	0.801	0.357	0.676	0.67	0.471	0.822	0.568	0.816	1.142	0.97	1.187	1.059	0.801	0.667	1.138	0.719	1.133	1.054	1.707	0.667	1.052	0.822	0.812	0.648	0.753	0.707	0.591	0.673	0.724	0.611	0.83	1.089	1.125	0.82	0.726	1.07
1858	692.2480667	633.237208	635.2433307	399.178888	2.006122706	2818.4	1	1	0.17	0.17	0.794	0.604	0.334	0.326	0.271	0.17	0.281	0.17	0.17	0.17	0.326	0.17	0.17	0.17	0.536	0.464	0.17	0.17	0.17	0.17	0.17	0.17	0.882	0.608	0.17	0.17	0.441	0.392	0.358	0.17	0.17	0.322	0.17	0.369	0.708	0.708	1.13	1.155	0.394
1860	694.459	640.7841643	642.7909757	813.4516887	2.006811405	2512	2	2	1.566	1.767	2.01	2.731	1.756033478	2.456	1.063	2.115	1.419	0.688	1.693	1.06	0.785	1.457	0.919	1.873	1.292	1.835	1.623	2.247	2.611	3.742	1.244	1.982	1.802	3.663	2.94	1.498	0.805	2.006	1.673	2.971	1.262	1.2	1.3	1.428	1.566	1.514	1.757	1.785	2.058
1862	694.6075	324.0897456	326.097806	180.0628513	2.008060406	2107	2	2	0.859	0.511826266	0.795	0.721	1.217	0.984	1.06	0.661	0.846	1.009949611	0.818	0.999	1.174	0.949366129	0.77	0.954604315	1.017	0.777786624	1.066	1.07943761	1.01	1.192004514	1.072	0.957	1.321	1.201	1.364	1.234681481	0.901	0.852	0.939	1.27	0.932	0.894	0.939	1.159	0.604	0.509	1.078	1.058	0.457
1864	695.1515	544.1089727	546.1152464	310.0506527	2.006273725	2459.5	1	1	0.44	0.579	0.369	0.728	0.204	0.512	0.343	0.4	0.334	0.526	0.386	0.587	0.301	0.483	0.12	0.462	0.599	0.48	0.226	0.784	0.477	0.579	0.5	0.472	0.252	0.601	0.324	0.335	0.383	0.405	0.322	0.549	0.31	0.12	0.12	0.26	0.12	0.12	0.12	0.12	0.198
1865	695.7655556	548.184253	550.1907477	314.125933	2.006494729	2989.777778	1	1	0.484	0.535	0.653	0.663	0.777	0.487	0.337	0.364	0.562	0.448	0.683	0.34	0.647	0.574	0.59	0.662	0.836	0.716	0.448	0.590274286	0.43	0.43	0.43	0.43	0.76	1.045	0.323	0.432	0.585	0.494	0.536	0.571	0.579	0.590274286	0.44	0.557	0.448	0.590274286	0.898	0.590274286	0.475
1868	701.4152676	399.1370781	401.1437761	165.0787581	2.006697969	15035717.51	1	1	0.743	0.847	0.574	0.579	0.793	0.675	0.65	0.554	0.675	0.602	0.711	0.626	0.879	0.822	0.668	0.615	0.478	0.67	0.663	0.7	0.473	0.441	0.596	0.566	0.771	0.862	0.678	0.819	0.719	0.782	0.643	0.239	0.747	0.718	0.651	0.576	0.496	0.47	0.472	0.473	0.4
1871	706.949	476.2094205	478.2159267	484.302201	2.006506177	9926.666667	2	2	1.168	1.834	1.842	3.144	1.018	1.416	0.747	0.906	1.123	1.341	1.283	1.296	0.802	1.118	1.006	1.503	0.837	1.58	1.217	1.49	1.428	2.276	1.262	1.688	1.269	2.231	1.562	1.843	0.457	0.804	0.648	2.732	1.102	1.037	0.79	0.915	0.929	0.22	1.487	1.145884058	1.482
1875	708.967	381.5732789	383.5798428	295.0299178	2.006563896	7439	2	2	0.811	1.084	0.547	0.771	0.504	1.051	0.331	0.633	0.664	0.601	0.363	0.729	0.509	1.115	0.659	1.381	0.601	1.221	0.78	0.565	0.637	1.592	0.656	1.911	0.81	0.667	0.722	0.512	0.547	0.365	0.455	1.142	0.964	0.532	0.868	0.686	0.654	0.62	0.539	0.813	0.611
1876	709.024	381.5727392	383.5794241	295.0288385	2.00668485	4698	2	2	0.811	1.071	1.073	0.677	0.747	0.755	0.453	0.504	0.922	0.728	0.432	0.8	0.558	1.115	0.871	1.319	1.181	1.227	0.79	0.881	0.917	1.542	0.975	1.95	1.125	0.667	1.002	0.518	0.757	0.452	0.672	1.142	0.964	0.532	0.868	1.087	0.795	1.093	0.539	0.813	0.664
1877	709.033	613.8004531	615.8057977	759.4842662	2.005344615	2510	2	2	1.237	1.377	2.666	3.631	3.265	1.325	0.424	0.539	0.684	1.696	3.629	1.682	2.659	1.051	2.999	1.816	0.774	1.356	0.706	0.67	1.936	2.016	2.047	2.035	4.259	1.825	4.708	3.071	3.577	3.812	0.511	1.278	1.488	1.382	2.356	4.008	0.43	1.725320107	0.673	0.997828816	0.698
1878	709.047	476.2091621	478.2153325	242.1508421	2.006170366	4248	1	1	1.168	1.966	1.842	3.205	1.018	1.389	0.747	0.872	1.123	1.313	1.283	1.278	0.802	1.001	1.006	1.485	0.837	1.6	1.217	1.547	1.428	2.331	1.262	1.724	1.269	2.25	1.562	1.993	0.457	0.804	0.648	2.732	1.102	1.037	0.79	0.915	0.929	0.35	1.487	1.149826087	1.482
1880	709.4666222	335.1052942	337.1119271	101.0469742	2.006632893	6053.777778	1	1	0.732	0.435	0.962	0.543	1.108	0.706	1.103	0.733	1.379	1.105	0.903	0.749	1.133	0.758	1.164	0.828	0.816	0.653	1.019	0.767	0.94	0.623	0.79	0.481	1.347	1.353	0.553	0.593	0.468	0.547	0.478	0.865	1.094	1.009	1.47	0.8	0.323	0.283	0.802	0.913	0.533
1881	709.954	381.5732159	383.5799677	147.5148959	2.006751876	4752	1	1	0.811	1.084	0.606	1.073	0.565	1.051	0.331	0.633	0.664	0.702	0.363	0.729	0.509	1.115	0.659	1.381	0.601	1.243	0.78	0.565	0.637	1.592	0.656	2.076	0.81	1.096	0.722	0.813	0.547	0.365	0.455	1.142	0.964	0.532	0.868	0.686	0.654	0.877	0.539	0.813	0.611
1883	709.974	457.0632416	459.0697999	223.0049216	2.006558329	3240	1	1	0.638	0.833623862	0.606	0.737	0.53	0.626	0.661	0.582	0.639	0.516	0.479	0.704	0.957334083	0.83949622	0.527	0.511	0.715	0.65	0.875	0.699	0.428	0.761	0.746	0.754	0.489	0.543	0.748	0.676	0.541	0.48	0.342	0.422	0.561	0.551	0.592	0.573	0.518	0.651248433	0.557	0.51	0.46
1884	710.027	354.5640665	356.5712776	241.0114929	2.007211092	2160	2	2	0.637	0.68293239	0.634	0.662	0.671	0.759	0.711	0.603	0.698	0.498	0.624	0.932	0.713	0.907	0.71	0.641	1.153	0.878	0.765	0.538413887	0.863	1.417	0.679	0.85	0.767	0.728	0.73	0.696	0.686	0.581	0.599	0.532	0.607	0.521267881	0.661	0.736	0.654	1.225498392	0.602	0.685285111	0.79
1885	710.0419394	395.1087873	397.1150441	161.0504673	2.006256798	9764.606061	1	1	1.543	1.492	0.409	0.462	0.1	0.107	0.31	0.308	0.42	0.367	1.889	1.734	0.973	0.965	0.512	0.466	0.76	0.403	0.1	0.1	0.899	0.834	0.531	0.449	1.13	1.212	1.032	1.11	0.406	0.474	1.012	0.354	0.1001	0.1001	0.1001	0.972	0.444	0.384	0.162	0.14	2.568
1888	710.0957143	438.122095	440.1280453	204.063775	2.005950351	5461.238095	1	1	0.715	0.893	0.843	0.959	1.161	1.074	1.043	0.739	0.983	1.157	1.463	1.043	1.386	1.409	1.242	1.083	1.278	1.591	1.297	1.305	1.776	1.719	2.233	1.43	1.177	1.874	1.311	0.99	3.523	3.807	1.133	1.577	0.683	0.799	0.733	1.17	0.808	0.851	1.106	1.097	0.616
1892	710.714172	517.1858036	519.1920433	283.1274836	2.00623961	4716.473118	1	1	1.038	1.122	1.841	1.765	1.334	1.058	1.095	1.101	0.472	0.445	0.883	0.813	1.327	1.611	0.588	0.514	0.13	0.871	1.181	1.212	0.1001	0.1001	0.4	0.473	1.734	2.021	0.508	0.472	1.718	1.46	0.278	0.216	1.649	1.532	1.535	0.785	0.1	0.1001	0.1001	0.1001	0.1001
1893	710.741119	335.1417765	337.1484133	101.0834565	2.006636729	19540.40476	1	1	0.635	0.698	0.853	0.836	0.903	0.799	1.11	0.938	0.931	0.821	0.809	0.698	0.78	0.792	0.876	0.867	0.848	0.825	0.83	0.869	0.957	0.896	0.898	0.796	0.875	0.986	0.663	0.797	0.524	0.695	0.806	1.125	0.822	0.847	0.787	0.733	0.595	0.598	0.945	1.009	0.58
1894	710.7912	443.1269417	445.1330312	209.0686217	2.006089512	3740.2	1	1	0.935	0.694	0.751	0.507	0.741	0.484	0.418	0.47	0.337	0.528	0.755	0.603	1.173	0.817	0.705	0.58	0.368	0.42	0.29	0.487	0.576	0.457	0.598	0.55	0.625	0.533	0.682	0.657	0.915	0.976	0.325	0.339	0.654	0.652	0.849	0.911	0.268	0.294	0.237	0.241	0.32
1895	710.8223643	375.622026	377.6287147	283.1274121	2.006688657	9511.171429	2	2	0.993	1.227	1.857	1.865	1.174	0.951	1.295	1.198	0.463	0.422	0.942	0.82	1.199	1.281	0.416	0.542	0.1	0.888	1.266	1.31	0.1001	0.1001	0.353	0.353	2.012	2.105	0.467	0.454	1.794	1.433	0.252	0.165	1.666	1.791	1.375	0.7	0.1	0.1001	0.1	0.1001	0.1
1896	711.02	592.1239892	596.1370283	125.0146492	4.013039084	4374	1	2	0.626	0.759758689	0.526	0.558	0.955	1.078	0.95	0.782231116	1.147	0.841852279	0.812	0.747197365	1.032	1.209	0.868	0.875	0.264	1.056285266	1.21	1.141121236	0.613	0.927	0.84	0.864422862	1.21	1.405	1.173	1.038	0.348	0.376	1.183	0.946	1.34	1.26	0.956	0.667	0.199	0.193	0.319	0.307	0.283
1897	711.0344615	435.1582533	437.1647222	201.0999333	2.006468889	3418.153846	1	1	0.324	0.342960059	0.12	0.146	0.516	0.502	0.154	0.12	0.199	0.12	0.353	0.356	0.273	0.246	1.566	1.43	0.158	0.755	1.232	1.656	0.601	0.49	0.12	0.12	0.262	0.333	0.12	0.12	0.39	0.457	0.152	0.687	0.401	0.486	0.385	0.12	0.28	0.29	0.644	0.786	0.12
1898	711.075	351.1308693	353.1410752	117.0725493	2.010205857	3314	1	1	1.496	0.648	1.872	0.648	0.879709313	0.559	0.996560195	0.48	1.278	0.656	1.88	0.827	1.211	0.671	1.533	0.669	1.455	0.573	1.681	0.617	2.09	0.592	0.712	0.69	1.431	0.715	0.916	0.744	1.473	1.227	1.313	1.628	1.558	0.602	1.771	0.930850117	0.726	1.196	1.197	0.896578024	1.111
1899	711.2196	318.6009072	320.6076447	169.0851744	2.006737473	2649.2	2	2	1.716	1.542	1.57	0.872	1.263	1.289	0.178481298	0.365	1.123	1.125	1.807	1.675	0.916	1.01	0.855	0.714	2.021	1.63	1.397	1.858	0.425	0.539072501	0.671	0.621	0.676	0.743	0.124053536	0.1001	0.245	0.319	0.573	1.22	0.394	0.354	0.364	1.073	2.806	2.626	0.5	0.507	1.056
1900	711.8095	378.1005236	380.1072049	144.0422036	2.00668135	6997	1	1	0.676	0.67	0.659	0.676	0.737	0.711	0.655	0.552	0.668	0.567	0.688	0.631	0.865	0.973	0.74	0.665	0.688	0.621	0.782	0.651	1.121	0.897	1.087	1.05	0.813	0.891	0.721	0.931	2.134	2.452	0.633	0.773	0.692	0.677	0.585	0.673	0.669	0.695	0.908	0.946	0.602
1901	712.1108299	414.1225322	416.1290204	180.0642122	2.006488126	15890.55782	1	1	0.358	0.305	0.204	0.155	0.591	0.473	0.986	0.782	1.016	0.919	0.933	0.729	0.207	0.161	0.942	0.644	1.118	1.462	1.271	1.004	0.562	0.549	1.76	1.31	1.677	1.543	2.045	2.093	0.1	0.1	0.272	0.298	0.1001	0.1001	0.1	0.443	0.307	0.1001	0.145	0.1001	0.1001
1902	713.0482544	399.1367964	401.1433741	165.0784764	2.006577632	165280.6154	1	1	0.744	0.853	0.567	0.583	0.796	0.664	0.651	0.558	0.671	0.585	0.711	0.63	0.883	0.817	0.666	0.605	0.48	0.669	0.659	0.665	0.469	0.449	0.599	0.534	0.764	0.855	0.68	0.813	0.715	0.783	0.641	0.24	0.739	0.724	0.647	0.576	0.501	0.472	0.482	0.471	0.406
1903	716.2303333	349.1211906	351.1310321	115.0628706	2.009841507	4740	1	1	0.592	0.641	0.555	0.666	0.454	0.625	0.690049513	0.651	0.591	0.688	0.573	0.624	0.571	0.597	0.585	0.593	0.504	0.668	0.574	0.717	0.644	0.662	0.553	0.486	0.533	0.433	0.508	0.477	0.444	0.548	0.335	0.478	0.817	1.08	0.991	0.517	0.608	0.528	0.43	0.447	0.549
1905	719.7267394	351.100455	353.107124	117.042135	2.006669082	547194.1576	1	1	0.468	0.152	0.293	0.1	0.1	0.103	0.155	0.137	0.137	0.16	0.126	0.131	0.13	0.164	0.102	0.101	0.104	0.101	0.104	0.103	0.114	0.105	0.132	0.11	0.1	0.136	0.122	0.137	0.11	0.138	0.105	0.236	0.164	0.19	0.139	0.17	0.1	0.1	0.143	0.136	0.136
1906	720.3125	421.1424352	423.1490002	187.0841152	2.006564977	48925.5098	1	1	0.545	0.476	0.396	0.384	0.523	0.528	0.372	0.353	0.43	0.572	0.671	0.731	0.509	0.511	0.431	0.409	0.185	0.375	0.513	0.585	0.328	0.392	0.247	0.193	0.28	0.334	0.461	0.488	0.418	0.467	0.322	1.458	0.826	0.873	0.962	0.441	0.285	0.295	0.232	0.223	0.121
1907	720.9249753	327.6059259	329.6126149	187.0952118	2.006688989	5356.732797	2	2	1.566	1.305	1.285	0.941	1.155	1.127	0.193	0.625206869	1.251	1.192	1.999	1.777	0.796	0.917	0.664	0.788	2.103	1.419	1.335	1.47	0.386	0.314	0.599	0.618	0.543	0.76	0.193	0.224	0.182	0.249	0.483	0.96	0.376	0.346	0.461	0.968	2.254	2.108	0.428	0.375	1.041
1908	723.022986	379.1316967	381.1382646	145.0733767	2.006567895	162382.493	1	1	0.596	0.678	0.56	0.543	0.665	0.583	0.909	0.697	0.964	0.951	0.781	0.729	0.768	0.741	0.718	0.634	0.707	0.415	0.579	0.573	0.462	0.422	0.45	0.389	0.714	0.809	0.595	0.705	0.512	0.551	0.434	0.529	1.216	1.165	1.082	0.763	0.451	0.446	0.624	0.625	0.556
1909	723.8266429	296.5656573	298.5723178	125.0146747	2.006660422	93578.50549	2	2	0.646	0.807	0.548	0.486	0.911	1.052	0.876	0.798	1.232	0.877	0.828	0.743	1.019	1.237	0.846	0.969	0.264	1.144	1.237	1.169	0.646	0.576	0.788	0.86	1.161	1.738	1.106	1.318	0.326	0.376	1.137	0.973	1.24	1.331	0.932	0.619	0.203	0.19	0.321	0.308	0.266
1911	724.0218161	297.5648371	299.5713349	127.0130342	2.006497742	13057.51724	2	2	0.614	0.805	0.64	0.507	0.915	1.079	0.919	0.852	1.171	0.903	0.857	0.801	1.085	1.357	0.898	1.078	0.306	1.172	1.22	1.185	0.724	0.651	0.845	0.882	1.157	1.776	1.054	1.319	0.35	0.459	1.234	0.945	1.42	1.316	0.943	0.631	0.24	0.238	0.371	0.303	0.303
1913	724.428	395.1257039	397.128974	161.0673839	2.003270114	13854	1	1	0.744	0.758	0.521	0.42	0.507	0.282	0.48	0.472	0.419	0.317	0.644	0.53	0.61	0.755	0.447	0.435	0.694	0.326	0.331	0.62	0.15	0.316	0.264	0.256	0.3	0.591	0.262	0.347	0.344	0.397	0.427	0.479	0.717	2.554420143	0.512	0.355	0.667	0.581334864	0.619	0.85	0.573
1914	725.00925	707.1181858	711.1313004	240.0088458	4.013114578	3190.5	1	2	0.506	0.629	0.579	0.542	0.585	0.616	0.562	0.601	0.594	0.525	0.451	0.538	0.646	0.813	0.559	0.567	0.972	0.723	0.661	0.7510606	0.728	0.699	0.649	0.616	0.754	0.915	0.661	0.611	0.653	0.519	0.637	0.441	0.482	0.506	0.512	0.615	0.546	0.47339389	0.615	0.830573583	0.645
1915	725.1134894	429.1110458	431.1175273	195.0527258	2.006481449	25785.96809	1	1	0.215	0.279	0.203	0.194	0.942	0.719	0.466	0.415	0.541	0.533	0.645	0.545	0.308	0.242	0.25	0.197	0.136	0.205	1.1	1.041	0.783	0.676	1.306	1.299	3.003	2.722	0.415	0.448	0.166	0.164	0.175	0.108	0.172	0.148	0.188	1.67	0.167	0.142	0.189	0.203	0.193
1916	725.409	345.0570736	347.0649037	221.9975072	2.007830103	1890	2	2	0.698	1.926998309	0.734	0.606	1.152	0.942	6.43	2.105776944	1.002	0.804	1.067	0.973146158	1.174	1.053	0.717	1.335021564	0.35	1.264109583	1.019	2.22189702	0.5	1.106173319	0.888	0.909	1.105	1.848	1.164	1.247	0.35	0.445	0.915	0.927	1.139	1.43	0.856	0.577	0.35	0.35	0.35	0.691	4.739775652
1917	725.437	336.0522655	338.0587034	203.987891	2.006437881	2529.142857	2	2	0.692	0.835	0.506	0.514	0.771	1.14	0.923964931	0.923964931	1.145	0.941	0.827	0.828	1.023	1.479	0.733	1.014	0.3	1.078	0.998	1.11	0.717	0.633	0.843	1.054	1.266	1.63	1.092	1.26	0.3	0.504	1.153	1.078	1.029	1.39	0.856	0.768	0.3	0.3	0.373	0.3	0.3
1918	725.447	341.0928237	343.0992855	107.0345037	2.006461821	3678	1	1	0.843	0.581	0.964	0.897	0.999	0.804	0.886	0.712	1.031	0.924	0.815	0.726	1.021	0.849	1.078	0.88	0.938	0.928	0.916	0.776	0.945	0.98	1.118	0.915	0.884	1.015	0.793	0.94	0.667	0.872	0.939	1.315	0.701	0.879	0.8	0.762	0.674	0.735	0.824	0.741	0.558
1919	725.5363333	338.0839709	340.0907896	208.0513017	2.006818725	3435.111111	2	2	0.985	1.191	0.556	0.441	0.644	0.698	0.519	0.625	0.601	0.429	0.831	0.954	0.699	0.539	0.791	0.83	0.7	0.735	0.642	0.499	1.057	1.141	0.709	0.883	0.836	0.909	0.735	0.852	0.577	0.605	0.744	0.324	0.768	0.654	0.514	0.4	0.642	0.624	0.88	1.066	0.778
1920	725.786	395.6233821	397.6299079	323.1301242	2.006525837	6511	2	2	0.846	0.805	0.475	0.434	0.522	0.515	0.574	0.642	0.451	0.441	0.595	0.738	0.658	0.864	0.498	0.569	0.815	0.559	0.44	0.620428582	0.203	0.197	0.311	0.263	0.371	0.608	0.314	0.505	0.419	0.466	0.509	0.426	0.762	0.620428582	0.589	0.398	0.774	0.620428582	0.672	0.620428582	0.624
1921	725.895125	363.1366751	365.1463819	129.0783551	2.009706804	450789.3182	1	1	0.41	0.317	0.794	0.557	0.476	0.329	7.153	4.491	0.601	0.41	0.809	0.519	0.473	0.347	0.839	0.485	0.783	0.372	0.928	0.693	0.63	0.39	0.576	0.34	1.738	1.664	0.692	0.647	0.746	0.82	0.542	0.521	0.346	0.371	0.346	0.568	0.393	0.365	0.543	0.563	0.8
1922	726.2436667	457.0636065	459.0698832	446.0105729	2.006276767	2138.666667	2	2	0.584	0.64	0.701	0.739	0.507	0.616	0.76	0.602	0.743	0.613	0.45	0.63	0.891742192	0.64	0.518	0.53	0.562	0.807	0.922	0.704	0.49	0.823	0.781	0.791	0.511	0.544	0.757	0.659	0.688	0.556	0.381	0.414	0.564	0.505453629	0.547	0.604	0.682	0.649672769	0.495	0.64	0.491
1923	726.3791429	354.0627815	356.0693442	240.008923	2.006562734	5663.910714	2	2	0.585	0.631	0.631	0.538	0.539	0.524	0.558	0.542	0.572	0.481	0.498	0.534	0.619	0.662	0.567	0.605	0.888	0.774	0.685	0.667	0.724	0.661	0.668	0.756	0.681	0.725	0.611	0.619	0.601	0.587	0.591	0.505	0.469	0.401	0.515	0.631	0.53	0.629077584	0.601	0.712881634	0.639
1928	726.8949583	395.1209954	397.1264928	322.1253507	2.005497417	21621.83333	2	2	0.759	0.76	0.613	0.443	0.521	0.479	0.498	0.515	0.422	0.37	0.66	0.616	0.632	0.861	0.605	0.505	0.651	0.53	0.379	0.62	0.62	0.159	0.259	0.266	0.334	0.539	0.281	0.318	0.369	0.409	0.472	0.432	0.703	0.62	0.564	0.388	0.648	0.582349727	0.597	0.582349727	0.539
1929	727.3232615	464.2230349	466.2275007	230.1647149	2.004465821	12689.81538	1	1	0.433	0.396	1.072	1.186	0.582	0.54	0.681	0.678831907	0.497	0.453960416	1.246261203	0.755740762	0.738	0.633789274	0.695	0.28	1.938	0.28	0.784	0.781	3.755	3.7	1.049	1.024	0.769	1.181	0.567	0.701456188	0.676	0.896	0.562	0.479261792	0.576	0.493	0.509	0.88	0.718	0.671	3.504	3.618	3.091
1930	727.384	385.1188886	387.1261833	151.0605686	2.007294762	17872	1	1	0.619	0.54	0.733	0.579	0.586	0.509	2.555	1.936	0.656	0.524	0.659	0.623	0.57	0.498	0.754	0.723	0.673	0.645	0.829	0.725	0.914	0.934	0.823	0.604	0.962	0.932	0.761	0.911	0.554	0.661	0.703	1.104	0.474	0.427	0.41	0.551	0.486	0.521	0.762	0.787	0.593
1933	727.8451515	395.1227789	397.1290156	322.1289179	2.006236654	20009.09091	2	2	0.734	0.769	0.506	0.42	0.518	0.446	0.498	0.525	0.422	0.406	0.673	0.578	0.61	0.859	0.454	0.528	0.694	0.495	0.379	0.62	0.62	0.169	0.259	0.254	0.334	0.597	0.280904959	0.347	0.344	0.397	0.452	0.479	0.717	0.62	0.512	0.355	0.667	0.579793194	0.619	0.579793194	0.592
1935	732.9789524	365.6112754	367.6194733	131.5529554	2.008197891	993161.8095	1	1	0.614	0.700423721	0.579	0.683	0.474	0.518	0.331	0.492	0.394	0.398937876	0.819	0.73274095	0.793	0.731	0.707	0.635	0.478	0.446169476	0.614	0.695	0.466	0.474946362	0.621	0.595	0.485	0.623	0.496	0.698	0.612	0.782	0.404	0.13	0.466	0.581	0.419	0.508	0.464	0.545	0.436	0.528	0.321
1936	733.3023125	365.152445	367.1592171	131.094125	2.006772096	18212670.13	1	1	0.641	0.732	0.652	0.668	0.616	0.53	0.485	0.493	0.505	0.492	0.839	0.86	0.805	0.736	0.775	0.635	0.603	0.554	0.681	0.82	0.563	0.561	0.686	0.604	0.585	0.61	0.609	0.765	0.65	0.793	0.544	0.148	0.595	0.586	0.566	0.591	0.579	0.575	0.569	0.567	0.449
1938	738.7035	395.1202236	397.1265037	322.1238072	2.006280137	14499	2	2	0.747	0.761	0.423	0.443	0.513	0.479	0.553	0.51	0.398	0.421	0.626	0.611	0.709	0.847	0.455	0.504	0.719	0.545	0.762	0.85	0.85	0.171	0.341	0.273	0.356	0.56	0.85	0.332	0.312	0.371	0.45	0.564	0.746	0.85	0.467	0.315	0.676	0.592797464	0.618	0.85	0.586
1939	739.1550714	395.1235962	397.128892	322.1305524	2.0052958	12327.64286	2	2	0.706	0.765	0.5	0.42	0.523	0.516	0.509	0.486	0.405	0.406	0.637	0.376	0.655	0.898	0.46	0.494	0.706	0.603	0.335	0.578606481	0.149964729	0.388	0.264	0.327	0.329	0.613	0.287777614	0.401	0.334	0.386	0.44	0.487	0.756	0.62	0.502	0.343	0.697	0.578606481	0.604	0.62	0.596
1940	739.9924634	579.212661	581.219124	345.154341	2.006462959	41530.34146	1	1	0.598	0.684	0.889	0.847	0.887	0.781	0.999	0.867	0.924	0.757	0.791	0.635	0.803	0.738	0.769	0.755	0.809	0.809	0.737	0.824	0.932	0.844	0.834	0.732	0.811	0.962	0.607	0.764	0.483	0.644	0.74	0.981	0.823	0.842	0.743	0.676	0.538	0.556	0.954	0.959	0.565
1941	740.0090909	680.2542407	682.2603144	446.1959207	2.006073672	54698.90909	1	1	0.634	0.623	0.882	0.762	0.939	0.764	0.925	0.843	0.87	0.958	0.767	0.703721844	0.792	0.759	0.771	0.780703266	0.828	0.769476414	0.813	0.656	0.85	0.817	0.872	0.826788112	0.864	1.035	0.592	0.779	0.472	0.638	0.717	0.944	0.774	0.802	0.75	0.75	0.565	0.566	0.878	0.928	0.602
1943	744.6543636	335.1420404	337.1487578	101.0837204	2.006717463	18523715.91	1	1	0.637	0.729	0.918	0.905	0.963	0.837	1.092	0.931	0.978	0.803	0.792	0.672	0.796	0.813	0.87	0.822	0.869	0.835	0.791	0.9	0.955	0.931	0.928	0.78	0.909	1.056	0.673	0.805	0.517	0.704	0.796	1.076	0.856	0.865	0.801	0.738	0.586	0.589	1.001	1.036	0.582
1944	744.681	335.5817459	337.5896907	101.5234259	2.007944784	798954	1	1	0.531	0.707	0.932	0.969	1.037	0.789	1.048	0.889	0.942	0.809	0.764	0.728661444	0.834	0.91	0.859	0.798	0.82	0.814792148	0.786	0.789	0.993	0.976817896	1.005	0.738	0.989	1.016	0.721	0.765	0.439	0.688	0.758	1.025	0.798	0.838	0.841	0.767	0.641	0.607	0.959	1.022	0.58
1945	745.1034093	557.2307958	559.2372688	323.1724758	2.006473012	140067.5349	1	1	0.595	0.648	0.881	0.824	0.941	0.78	1.018	0.814	0.909	0.784	0.761	0.633	0.754	0.756	0.818	0.807	0.799	0.826	0.782	0.77	0.927	0.864	0.884	0.715	0.849	0.968	0.638	0.751	0.487	0.671	0.717	1.016	0.82	0.805	0.751	0.676	0.559	0.585	0.918	0.956	0.552
1946	746.458169	378.1000363	380.1064939	144.0417163	2.006457594	188006.7324	1	1	0.64	0.765	0.629	0.668	0.722	0.641	0.648	0.483	0.614	0.627	0.692	0.617	0.907	0.795	0.755	0.71	0.753	0.864	0.842	0.778	1.274	1.088	1.168	1.096	0.831	0.986	0.724	0.973	2.165	2.613	0.609	0.844	0.715	0.725	0.513	0.63	0.688	0.66	0.966	0.939	0.623
1950	753.2823448	318.6005744	320.6072289	169.0845087	2.006654568	8702.827586	2	2	1.71	1.466	1.347	0.98	1.387	1.266	0.178	0.155	1.117	1.09	2.025	2.063	0.925	1	0.8	0.797	2.026	1.431	1.391	1.374	0.449	0.436	0.72	0.593	0.697	0.733	0.124	0.169	0.179	0.178	0.449	1.194	0.399	0.427	0.433	1.035	2.973	2.768	0.425	0.49	1.081
1951	753.6477222	395.1088756	397.1152592	161.0505556	2.006383598	23532.41975	1	1	0.538	0.617	0.246	0.233	0.1001	0.1001	0.101	0.104	0.562	0.458	0.859	0.785	0.966	0.902	0.956	0.812	0.564	0.138	0.364	0.343	0.915	0.774	0.388	0.417	0.603	0.608	0.617	0.682	0.191	0.218	1.512	0.613	0.1001	0.1001	0.1001	0.709	0.33	0.289	0.184	0.189	1.877
1952	753.8311724	379.1317513	381.1381965	145.0734313	2.00644519	5541.793103	1	1	0.942	0.994	1.021	0.885	0.884	0.721	1.122	0.821	0.97	0.615	1.08	0.739	1.145	0.885	1.002	0.895	1.19	0.614	0.932	0.992	1.356	0.775	0.843	0.574	1.166	0.822	0.898	0.631	1.502	1.394	1.014	0.952	1.02	0.93	0.996	1.06	0.392	0.466	0.758	0.729	0.583
1953	753.9357553	345.0919493	347.0986513	222.0672586	2.006701988	19946.29787	2	2	1.023	1.168	0.433	0.357	0.443	0.446	0.477	0.395	0.622	0.53	0.891	0.867	0.63	0.813	0.646	0.668	0.693	0.642	0.404	0.438	0.725	0.812	0.443	0.494	1.089	1.565	0.337	0.419	0.406	0.416	0.335	0.142	0.556	0.546	0.381	0.421	0.744	0.691	0.532	0.517	0.559
1956	754.188	697.7798048	699.7855388	463.7214848	2.005734064	5352	1	1	0.511	2.997	0.523	1.489	0.992	1.511	0.269	1.084	0.795	0.899824066	1.264	0.888067228	0.22	0.925	0.715	1.745021015	1.389	1.472406169	0.505	1.293972166	0.33	1.79398126	0.861	1.782	0.668	1.434	0.974	0.452	0.365	1.747	0.387	1.571	3.218	2.09	0.548	1.204	1.309	1.293972166	0.703	1.293972166	0.687
1958	754.4725833	697.0257745	699.0323752	462.9674545	2.006600642	7146.166667	1	1	0.398	2.306	0.412	1.473	0.825	1.453	0.231	0.933	0.631	0.788	1.097	0.774	0.187	0.763	0.692	1.46	1.136	0.922	0.424	0.67	0.292	1.383	0.706	1.668	0.544	1.497	0.881	0.93	0.297	1.564	0.244	0.993	2.701	1.914	0.347	0.895	1.046	1.08736413	0.727	1.08736413	0.627
1960	754.5629333	697.5269331	699.5336526	926.9372263	2.006719485	8070.952381	2	2	0.371	2.665	0.457	1.744	0.844	1.506	0.324	1.212	0.829	0.968	1.165	0.941	0.286	0.995	0.738	1.679	1.438	1.261	0.45	1.248440217	0.331	1.689	0.745	2.067	0.634	1.515	0.956	0.95	0.256	1.691	0.235	1.322	3.202	1.618	0.435	1.252	1.206	1.248440217	0.656	1.248440217	0.688
1961	754.6805632	416.1155098	418.1221806	182.0571898	2.006670803	27443.65517	1	1	0.316	0.1	0.175	0.142	0.778	0.613	0.452	0.15	0.556	0.487	0.553	0.299	0.658	0.264	0.545	0.253	0.319	0.135	1.291	1.249	0.812	0.746	1.196	1.532	2.254	4.228	0.424	0.539	0.343	0.1	0.816	0.807	0.477	0.503	0.342	1.122	0.367	0.156	0.417	0.314	0.335
1962	754.8075517	346.0911015	348.0975272	224.065563	2.006425712	3387.517241	2	2	1.067	1.266	0.446	0.452	0.511	0.556	0.438	0.482	0.62	0.541	1.152	0.869	0.752	0.779	0.7	0.602	0.716	0.719	0.392	0.479	0.986	0.784	0.641	0.49	1.149	1.656	0.396	0.463	0.362	0.611	0.464	0.17	0.547	0.581	0.438	0.491	0.794	0.834	0.59	0.463	0.598
1964	755.122	697.276145	699.2828537	926.43565	2.006708742	11840	2	2	0.425	2.746	0.573	1.799	0.948	1.611	0.381	1.232	0.8	0.973	1.326	0.852	0.3	0.943	0.779	1.743	1.4	1.407	0.488	1.186	0.439	1.881	0.876	2.467	0.671	1.599	1.054	1.071	0.392	1.68	0.378	1.324	2.945	2.268	0.457	1.197	1.296	9.99	0.831	9.99	0.767
1966	755.1405	697.2767135	699.2834056	463.2183935	2.006692125	11281	1	1	0.425	2.777	0.552	1.772	0.934	1.626	0.381	1.121	0.816	0.966	1.324	0.881	0.3	0.956	0.779	1.665	1.4	1.322	0.5	1.186	0.439	2.139	0.905	2.484	0.671	1.523	1.054	1.063	0.392	1.68	0.378	1.293	2.945	2.268	0.457	1.197	1.296	9.99	0.831	9.99	0.767
1971	755.8265479	327.6059276	329.6126199	187.0952152	2.006692274	81135.25532	2	2	1.548	0.964	1.049	0.735	1.047	1.063	0.13	0.122	1.089	1.003	1.988	1.667	0.757	0.641	0.68	0.611	1.939	1.239	1.288	1.274	0.332	0.308	0.53	0.506	0.547	0.637	0.123	0.139	0.162	0.16	0.419	0.635	0.267	0.305	0.326	0.889	1.983	1.98	0.301	0.265	0.857
1972	755.9296987	404.1269189	406.1334852	170.0685989	2.006566251	18515.9359	1	1	1.313	0.959	1.039	0.619	1.11	0.988	0.14	0.133	0.982	0.942	1.733	1.621	0.64	0.589	0.65	0.597	1.742	1.139	1.228	1.161	0.34	0.357	0.578	0.523	0.56	0.639	0.163	0.168	0.182	0.173	0.422	0.231	0.261	0.258	0.341	0.917	1.529	1.565	0.283	0.302	0.792
1974	756.0136504	371.1052704	373.1119454	137.0469504	2.006674983	6872.01626	1	1	0.287	0.305	0.204	0.209	0.831	0.52	0.514	0.348	0.725	0.472	0.605	0.434	0.303	0.219	0.266	0.259	0.169	0.21	0.897	0.461	0.797	0.547	1.253	0.839	2.28	1.711	0.366	0.389	0.174	0.163	0.175	0.22	0.154	0.109	0.17	1.476	0.212	0.1001	0.244	0.144	0.191
1975	756.02195	393.1255021	395.1313522	159.0671821	2.005850114	3751	1	1	0.647	0.824	0.749	0.765	0.647	0.686	0.639	0.556	0.712	0.594	0.689	0.75	0.736	0.818	0.698	0.73	0.72	0.743	0.647	0.714	0.724	0.845	0.621	0.701	0.649	0.783	0.694	0.689	0.67	0.7	0.687	0.957	0.53	0.55	0.56	0.688	0.563	0.654	0.739	0.717	0.529
1978	756.1785556	597.2258059	599.2326806	363.1674859	2.006874739	3380.666667	1	1	1.268	1.368	2.007	2.071	1.273	1.264	1.072	0.946	1.505	1.484	1.337	1.299	0.99	1.014	1.399	1.611	1.077	1.449	1.561	1.22	1.71	1.823	1.735	1.399	1.716	2.093	1.797	1.936	0.579	0.883	0.803	1.629	1.037	1.152153005	0.999	1.284	1.132	1.152153005	1.66	1.152153005	1.504
1982	756.9361389	328.6058451	330.6124101	189.0950501	2.006565011	7428.666667	2	2	1.668	1.063	1.169	0.826	1.175	1.086	0.181	0.154	1.108	1.064	1.848	1.756	0.797	0.71	0.784	0.716	1.85	1.308	1.283	1.308	0.345	0.372	0.599	0.542	0.633	0.741	0.225	0.213	0.213	0.175	0.475	0.369	0.327	0.308	0.351	1.015	2.017	1.9	0.335	0.285	0.883
1983	756.998963	371.6322592	373.6389647	275.1478784	2.006705529	2801.111111	2	2	0.523	0.443	0.571	0.709	0.77	0.66	0.918	0.652	0.614	0.43	0.447	0.367	0.621	0.531	0.376	0.287	0.982	0.573	0.505	0.469	0.375	0.557	0.394	0.334	0.672	0.662	0.446	0.387	0.425	0.509	0.319	0.168	0.575	0.733	0.669	0.623	0.501	0.685	0.667	0.1001	0.771
1984	757.0160098	673.2315143	675.2377856	439.1731943	2.0062713	4801.745098	1	1	0.498	2.452	0.571	1.684	1.103	1.489	0.32	1.285	0.855	0.996	1.386	1.063	0.308	1.253	0.808	1.711	1.422	1.449	0.443	1.408	0.342	1.954	1.009	2.422	0.761	1.725	1.357	1.34	0.494	2.042	0.297	3.723	2.634	2.531	0.554	1.319	1.062	1.003	0.786	0.666	0.656
1986	757.2146535	596.0821816	598.0878217	362.0238616	2.00564018	9481.637795	1	1	0.552	2.268	0.519	1.674	2.705	2.333	2.54	2.221	1.693	1.964	2.163	2.244	3.534	3.175	2.549	2.926	4.483	2.79	1.698	1.189	1.992	1.6	2.547	0.77	3.462	1.062	2.573	4.059	2.336	0.883	3.167	0.652	1.772	1.555	2.439	1.441	3.723	1.89	1.213	0.64	1.14
1988	757.2375	597.2286905	599.2354917	726.340741	2.006801154	2966	2	2	1.14	1.395	2.157	2.054	1.481	1.122	1.032	0.949	1.513	1.463	1.349	1.276	0.951	1.012	1.428	1.574	1.108	1.496	1.637	1.22	1.534	2.095	1.558	1.394	1.686	2.088	1.726	2.286	0.598	0.938	0.858	1.679	1.107	1.158808743	1.055	1.348	1.114	1.158808743	1.816	1.158808743	1.511
1989	757.336287	354.0636313	356.0702178	240.0106227	2.006586432	5591.477778	2	2	0.571	0.65	0.575	0.56	0.533	0.53	0.559	0.535	0.548	0.45	0.484	0.523	0.613	0.663	0.561	0.634	0.878	0.798	0.676	0.649	0.676	0.644	0.629	0.67	0.687	0.716	0.607	0.608	0.593	0.588	0.591	0.422	0.419	0.387	0.469	0.586	0.542	0.54	0.602	0.666	0.607
1990	757.5143561	596.7271118	598.7336492	362.6687918	2.006537352	4956.090909	1	1	1.095	1.363	1.858	1.858	1.219	1.206	0.858	0.846	1.465	1.285	1.444	1.199	1.03	0.951	1.398	1.29	1.043	1.47	1.515	0.93	1.637	1.752	1.641	1.52	1.675	1.96	1.502	1.853	0.626	0.812	0.979	1.551	1.127	0.84	0.992	1.192	0.997	0.61	1.773	0.92	1.44
2001	760.294	345.5931652	347.5997201	223.0696904	2.006554913	1896	2	2	1.221	1.553	0.545	0.475	0.41	0.71	0.469	0.417	0.815	0.636	1.002	0.908	0.726	0.749	0.729	0.734	0.851	0.91	0.363	0.423	0.787	0.778	0.552	0.573	1.114	1.452	0.379	0.42	0.434	0.45	0.34	0.121	0.667	0.704	0.446	0.425	0.711	0.767	0.585	0.591	0.53
2002	760.31	315.6100959	317.6171795	163.1035518	2.007083613	2532	2	2	0.723	0.603	0.591	0.577	0.647	0.678	0.592	0.325	0.705	0.342	0.565	0.512129034	0.49	0.617	0.45	0.571711821	0.894	0.483	0.657	0.674709024	0.832	0.602	0.826	0.895	0.464	0.655	0.541	0.533	0.436	0.546	0.526	0.259	1.147	1.067	0.822	0.378	0.593	0.598	0.536	0.474	0.61
2003	760.72	787.30337	789.3091249	553.24505	2.005754879	1710	1	1	0.19	0.19	0.19	0.19	0.369	0.19	0.676	0.917	0.453	0.19	0.19	0.19	0.82	0.19	0.784	0.19	1.329	0.19	0.19	0.19	0.19	0.19	0.19	0.19	0.19	0.19	0.19	0.19	0.456	0.19	0.552	0.19	0.445	0.427	0.632	0.19	1.642	1.299	1.784	2.145	1.905
2006	760.8556519	277.1002822	279.1069674	43.04196218	2.006685239	89704.17026	1	1	0.64	0.691	0.683	0.641	0.939	0.858	0.845	0.66	0.957	0.777	0.742	0.658	1.098	1.172	0.924	0.871	0.733	0.944	1.083	0.972	0.807	0.727	0.864	0.651	0.923	1.109	0.989	1.252	0.419	0.556	1.045	0.851	1.412	1.25	0.977	0.684	0.631	0.657	0.781	0.817	0.503
2008	761.0164286	416.1156957	418.1227968	182.0573757	2.007101011	5241.714286	1	1	0.393	0.191707906	0.4	0.16	0.752	0.502	0.51	0.45	0.557	0.588	0.552	0.292348593	0.661	0.328	0.671	0.385	0.457	0.502	1.162	1.447008171	0.783	0.713874487	1.393	1.122	2.126	2.163	0.462	0.469	0.432	0.383	0.699	0.642	0.539	0.487	0.406	1.144	0.418	0.419	0.392	0.435	0.465
2009	761.2405	335.1418385	337.1484372	101.0835185	2.006598678	118649.3108	1	1	0.628	0.734	0.899	0.925	0.968	0.819	1.134	0.914	1	0.803	0.808	0.672	0.805	0.823	0.883	0.829	0.885	0.835	0.822	0.825	0.946	0.932	0.937	0.788	0.913	1.063	0.679	0.782	0.533	0.699	0.812	1.102	0.845	0.855	0.825	0.74	0.587	0.596	0.968	1.037	0.575
2011	761.745	354.561583	356.5711009	241.006526	2.009517908	2354	2	2	0.567	0.587	0.68	0.615	0.532	0.662	0.552	0.655	0.624	0.546	0.605	0.584	0.889	0.725	0.641	0.639	1.059	0.797	0.654	0.81	0.745	0.727	0.731	0.682	0.871	0.804	0.627	0.637	0.654	0.667	0.648	0.562	0.514	0.637	0.503	0.632	0.571	1.225498392	0.583	0.685285111	0.756
2013	762.2512088	361.1212109	363.1278631	127.0628909	2.006652219	6593.472527	1	1	0.185	0.177	0.531	0.441	0.143	0.122	0.17	0.162	0.829	0.707	0.187	0.153	0.281	0.19	0.185	0.124	0.681	0.818	0.656	0.593	0.247	0.217	0.668	0.539	0.588	0.624	0.124	0.151	0.1	0.1	0.231	0.344	0.18	0.146	0.1	0.233	0.129	0.115	0.147	0.165	0.207
2016	762.37	328.1068842	330.1139031	188.0971283	2.007018973	2784	2	2	1.555	1.157	1.247	0.9	1.426	1.081	0.142	0.121	1.137	1.206	1.933	1.932	0.853	0.767	0.745	0.696	2.043	1.602	1.326	1.363	0.345	0.51	0.656	0.569	0.606	0.762	0.155	0.155	0.186	0.193	0.48	0.762	0.301	0.432	0.41	0.951	1.999	2.339	0.336	0.372	0.895
2019	762.4025385	378.1049111	380.110247	288.0931822	2.005335876	2814.615385	2	2	1.696	0.896851601	1.567	3.341	2.508	0.779208626	0.78	0.666172699	0.723	3.35	2.72	2.421	4.442	1.227707724	3.045	1.216656475	0.825	1.031153602	0.779	0.939831194	1.577	1.698789431	2.266	1.54954927	3.475	1.07	2.701	2.784	3.516	3.06	0.598	1.499	0.977	0.894	2.365	3.346	0.924	0.675354231	0.852	1.003818487	0.741046162
2021	762.6707762	315.1083313	317.1151128	162.1000227	2.006781426	37615.80952	2	2	0.589	0.683	0.507	0.478	0.56	0.552	0.587	0.556	0.681	0.445	0.525	0.458	0.468	0.549	0.485	0.572	0.789	0.44	0.576	0.59	0.673	0.671	0.751	0.763	0.465	0.684	0.491	0.608	0.399	0.516	0.454	0.239	1.011	1.098	0.77	0.324	0.538	0.514	0.462	0.456	0.496
2022	762.9842105	316.1081874	318.1147839	164.0997349	2.006596476	3908.526316	2	2	0.589	0.724	0.548	0.552	0.596	0.621	0.574	0.683	0.593	0.417	0.531	0.56	0.488	0.557	0.645	0.608	0.956	0.487	0.771	0.536	0.772	0.685	0.786	0.884	0.536	0.706	0.597	0.771	0.418	0.57	0.524	0.268	1.154	1.093	0.915	0.375	0.544	0.68	0.506	0.594	0.595
2023	763.302	306.084696	308.0912051	144.052752	2.006509092	6804	2	2	1.311	0.514	0.951	0.355	0.478	0.734	0.573	0.77	0.508	0.907	0.64	0.786	0.53	0.54	0.618	1.129	0.781	0.972	0.546	1.161	0.773	1.183	0.791	0.628	0.853	0.962	0.433	0.339	0.323	0.382	0.504	7.87	0.412	0.349	0.397	0.682	0.443	0.749	0.779	0.793	0.323
2024	763.3476667	395.623639	397.6297815	323.130638	2.006142474	2127.333333	2	2	0.784	0.791	0.506	0.408	0.523	0.508	0.707	0.578	0.583	0.376	0.709	0.629	0.72	0.951	0.511	0.742	0.853	0.482	0.509	0.644804462	0.203021074	0.198	0.305	0.307	0.519	0.56	0.367	0.442	0.401	0.471	0.523	0.694	0.866	0.644804462	0.71	0.413	0.792	0.644804462	0.801	0.644804462	0.653
2025	763.386	306.0849443	308.0913892	72.02662432	2.006444848	4318	1	1	1.311	0.514	0.951	0.355	0.501	0.734	0.573	0.77	0.459	0.907	0.64	0.786	0.53	0.54	0.618	1.129	0.781	0.972	0.546	1.161	0.773	1.183	0.791	0.628	0.857	0.962	0.433	0.339	0.323	0.382	0.504	7.87	0.412	0.349	0.397	0.682	0.551	0.751	0.779	0.793	0.323
2032	764.7151667	596.7281515	598.7346789	725.339663	2.006527365	2034.666667	2	2	1.162	1.407	1.858	1.804	1.326	1.23	0.858	0.993	1.465	1.384	1.444	1.407	1.03	0.92	1.392	1.368	1.043	1.56	1.515	0.93	1.637	1.936	1.639	1.636	1.675	2.332	1.53	2.125	0.626	0.836	0.979	1.551	1.127	0.84	0.992	1.192	0.997	0.61	1.773	0.92	1.382
2033	764.821	404.0916427	406.0977324	170.0333227	2.006089701	2999	1	1	0.701	1.153	0.783	1.386	0.853	0.874	0.79	0.745	0.788	0.954	1.08	0.876275163	1.148	0.871	0.945	1.172	1.143	0.927	0.744	0.785	0.876	0.947	1.513	1.457	1.082	0.993	0.92	0.762420247	0.626	0.993	0.83	1.019	0.815	0.604	0.879	0.953	1.069	1.025	1.051	1.058	1.29
2035	765.357	349.121761	351.1311571	115.063441	2.009396175	2748	1	1	0.825	0.809	0.905	0.805	0.738	0.808	0.649	0.838	0.708	0.838	0.903	0.912	0.741	0.755	0.874	0.718	0.715	0.713	0.871	0.906	0.863	0.763	0.625	0.69	0.611	0.562	0.669	0.768	0.697	0.655	0.548	0.439	1.243	1.233	1.297	0.773	0.606	0.636	0.599	0.562	0.559
2036	765.376	335.6193124	337.6264638	101.5609924	2.007151395	3998	1	1	0.299	0.298	0.459	0.271	0.473912807	0.516	0.449	0.511	0.805	0.41	0.382	0.451	0.632	0.643	0.56	0.443	0.796	0.483	0.712	0.829	1.453	1.694	1.029	1.266	0.234	0.492	0.498	0.373	0.415	0.507619443	0.343	0.232	0.765	0.725	0.574	0.471	0.833	0.868	1.008	1.018	0.939
2037	765.7964	397.1286509	399.1366802	163.0703309	2.008029314	3349.2	1	1	1.05	0.933	1.379	1.443	0.796	1.442	1.26	1.595	1.065	1.363	1.004	1.617	0.894	1.003	1.174	2.211	1.841	1.344	1.058	0.20907279	1.4	1.929	1.256	1.614	0.883	0.884	1.086	0.933	1.34	0.947	1.212	2.742	1.073	0.12	1.273	1.457	1.758	0.394	2.005	0.288	1.834
2038	765.8802105	535.2001917	537.2066328	301.1418717	2.006441154	2632.315789	1	1	0.564	0.455	0.644	0.529	0.699	0.457	0.37	0.412	0.425	0.443	1.166	0.999	0.852	0.601	0.675	0.579	0.867	0.337	0.713	0.705	0.697	0.512	0.62	0.356	0.543	0.505	0.76	0.593	0.454	0.637	0.358	0.258	0.889	1.006	1.045	0.509	0.696	0.687	0.54	0.506	0.578
2041	766.9736875	707.1168221	711.1305131	240.0074821	4.013691049	2347.34375	1	2	0.471	0.632	0.531	0.575	0.553	0.577	0.578	0.511	0.585	0.537	0.449	0.537	0.656	0.743	0.558	0.718	0.959	0.808	0.61	0.674	0.711	0.786	0.616	0.657	0.762	0.762	0.621	0.7	0.69	0.551	0.707	0.462	0.453	0.498	0.506	0.61	0.528	0.473	0.645	0.859	0.636
2044	768.33275	432.1591453	434.1654043	198.1008253	2.006259063	2309	1	1	0.804	0.631	1.145	0.969	1.143	0.939	0.755	0.505	0.929	0.719	0.954	0.805	1.46	1.088	1.121	1.148	0.333	0.427	0.975	0.979	0.425	0.408	0.435	0.236	0.873	1.038	1.191	1.483	0.721	1.062	0.804	1.15	0.721	0.694	0.916	1.122	0.304	0.324	0.558	0.578	0.398
2045	768.4840833	321.1268936	323.1330466	87.0685736	2.006152977	5849.833333	1	1	0.579	0.61	0.527	0.668	0.46	0.748	0.553	0.605	0.608	0.628	0.5	0.792	0.711	0.508	0.512	0.641	0.423	0.543	0.463	0.665	0.681	0.861	0.687	0.688	1.097	0.669	0.368	0.679	0.417	0.361	0.397	0.386	0.457	0.655	0.714	0.48	0.444	0.568	0.451	0.608	0.294
2050	769.8436186	462.2052344	464.2128985	228.1469144	2.007664046	11966.96907	1	1	0.624	0.433	0.637	0.441	0.598	0.382	0.526	0.341	0.476	0.425	1.09	0.856	0.763	0.588	0.638	0.539	0.666	0.3	0.714	0.632	0.548	0.369	0.427	0.317	0.314	0.298	0.465	0.462	0.588	0.656	0.384	0.18	1.018	0.972	1.1	0.514	0.526	0.519	0.393	0.364	0.362
2051	770.093	395.1260625	397.1300674	322.1354849	2.004004958	2714	2	2	0.625	1.599775432	0.493	0.651	0.486	2.113	0.56	1.629	0.382	0.743147785	0.606	4.423249119	0.699	2.005218512	0.451	1.898194383	0.627	1.606246788	0.456	2.11	0.311580082	1.471739941	0.456	0.7819643	0.34	1.642	0.383	1.6	0.422	0.416	0.483	0.518	0.782	2.554420143	0.456	0.356	0.741	1	0.625	0.85	0.696
2052	770.2736711	658.166618	660.1730044	424.108298	2.006386469	3364.578947	1	1	1.649	1.62	1.247	1.074	1.509	1.095	1.247	1.055	1.48	1.085	1.659	1.228	1.629	1.652	1.801	1.236	1.331	1.343	1.157	0.65	1.163	0.809	1.632	1.509	1.373	1.669	0.91	1.017	0.974	0.886	1.159	1.867	1.39	1.161	1.033	1.499	2.401	1.936	1.305	0.816	0.985
2053	770.3477031	352.0722021	354.0784608	118.0138821	2.006258655	11146.3125	1	1	0.78	0.841	0.677	0.65	0.686	0.594	0.784	0.471	0.822	0.517	0.51	0.489696888	0.943	1.153	0.593	0.546	0.564	0.656	0.53	0.619683529	0.562	0.52131614	0.76	0.62	0.617	0.886	0.423	0.53	0.312	0.284	0.631	1.476	0.779	0.747	0.625	0.483	2.105	1.379	0.831	0.684	0.454
2054	770.5086	741.2795498	743.2863278	507.2212298	2.006778045	2440.4	1	1	0.988	0.947	0.707	0.59	0.71	0.629	0.622	0.528	0.885	0.838	1.138	0.824	0.894	0.901	0.959	1.059	0.817	0.974	0.853	0.666	0.827	0.571	0.945	0.785	0.83	0.805	0.546	0.712	0.689	0.932	0.652	0.761	0.638	0.573	0.604	0.96	0.742	0.89	0.48	0.56	0.544
2055	770.5445	656.1602827	658.1667502	422.1019627	2.006467499	4146	1	1	0.513	0.496	0.402	0.293	0.369	0.347	0.318	0.249	0.469	0.4	0.39	0.425	0.479	0.526	0.353	0.312	0.347	0.371	0.315	0.354286458	0.27	0.361	0.502	0.366	0.325	0.485	0.271	0.517	0.316	0.302	0.368	0.523	0.328	0.59	0.358	0.314	0.583	0.614	0.283	0.46	0.225
2056	770.592	549.1687307	551.1731845	315.1104107	2.004453823	2876	1	1	1.166	1.11	0.898	0.968	1.072	0.912	0.975	0.647949759	1.284	0.861	1.38	1.032035588	1.115	0.944	1.454	1.573	1.375	1.219	1.231	1.02	0.862	0.688	1.276	1.164	1.085	0.996	0.759	0.973	0.995	0.996	0.892	1.011	1.119	0.944	0.934	1.192	1.161	1.037	0.803	0.773	0.761
2057	771.006	357.6351159	359.6414958	247.1535918	2.006379878	2054	2	2	0.496	0.494	0.898	0.748	1.019	1.01	0.905	0.546	0.894	0.587	0.712	0.57	1.31	0.899	0.724	0.54	0.87	1.296	0.809	0.883	1.135	1.379	0.641	0.278	1.064	1.324	0.518	0.563	0.55	0.814	0.458	0.46	1.699	1.46	1.136	0.584	0.541	0.485944885	0.826	0.87	0.642
2058	771.515	323.1334746	325.1433679	89.0751546	2.009893309	5142	1	1	1.395	0.834	1.7	1.026	1.103	0.782	1.882	1.484658106	1.213	1.417994113	1.186	1.027241657	2.238	1.633	2.114	1.511	1.607	1.6147514	1.568	9.96	1.41	1.719613827	2.762	2.591	1.688671884	1.639	1.667	2.434	1.507	1.291643418	1.532	1.941	2.112	1.805	2.306	2.669	0.969	1.637	1.5	7.6	1.012
2059	771.606	345.057229	347.0671657	110.998909	2.009936667	2716	1	1	2.254	1.927	1.842	1.250562275	0.6	3.36	0.968	2.106	0.981	1.731	2.921	2.769	6.12	0.6	2.166889942	1.987345295	1.491	1.420399734	0.81	3.443104196	1.995	1.563	1.796	2.351	4.483	3.211	1.097	2.935	0.6	3.288	1.162	0.894	2.2	3.273	2.859	1.143	3.317639447	2.093	1.185357377	1.667	2.101
2061	772.2699615	464.2172061	466.2266217	230.1588861	2.009415547	6012.153846	1	1	2.384	2.082	2.515	1.499	3.493	0.814	2.285	1.327	1.788	0.454	2.82	1.372	1.994	1.08	1.935	0.765806249	2.247	1.375873026	3.769	1.036	3.176	0.502	1.56	1.161	2.546	1.554	1.707	0.701	1.603	2.939	1.711	2.128	1.977	1.856	2.306	1.72	1.286	0.986	1.367	2.063	2.117
2062	772.6248736	354.5716515	356.5794226	241.026663	2.007771105	27854.48276	2	2	0.46	0.361	0.789	0.398	0.8	0.314	0.516	0.241	0.793	0.27	0.736	0.13	0.462	0.31	0.724	0.267	1.035	0.334	0.617	0.367	0.439	0.261	0.424	0.335	0.791	0.417	0.737	0.256	0.638	0.998	0.618	0.383	0.949	0.665	0.701	0.964	0.817	0.86	0.659	0.855	0.78
2063	772.6690713	305.0950184	307.1016139	71.03669842	2.006595497	67832.69854	1	1	1.19	0.976	0.778	0.544	0.79	0.657	0.587	0.468	1.03	0.858	1.201	0.981	0.942	0.843	1.189	1.056	0.965	0.932	0.837	0.763	0.652	0.525	1.158	0.813	0.747	0.888	0.515	0.686	0.743	0.885	0.647	0.805	0.609	0.608	0.631	1.008	0.814	0.796	0.519	0.469	0.542
2064	773.655	354.0697592	356.0760515	120.0114392	2.006292303	51785.33333	1	1	0.438	0.796	0.741	0.9	0.727	0.954	0.449	0.754	0.718	0.607	0.709	0.68	0.439	0.732	0.677	1.103	0.918	1.114	0.603	1.061	0.39	0.899	0.446	0.947	0.73	1.037	0.679	0.694	0.565	0.916	0.551	0.345	0.877	0.878	0.643	0.891	0.82	0.824	0.74	0.817	0.734
2065	774.0874	335.1415329	337.1482883	101.0832129	2.006755456	42822.4	1	1	0.643	0.757	0.9	0.916	0.98	0.824	1.138	0.904	1.014	0.832	0.809	0.684	0.825	0.831	0.91	0.84	0.908	0.833	0.832	0.834	0.942	0.933	0.947	0.782	0.924	1.065	0.688	0.793	0.542	0.698	0.836	1.107	0.841	0.857	0.841	0.761	0.599	0.613	0.955	1.018	0.582
2066	774.1477867	342.6292557	344.6359625	217.1418715	2.006706805	3177.653333	2	2	0.592	0.599	0.576	0.429	0.434	0.352	0.759	0.441	0.672	0.431	0.615	0.446	0.422	0.262	0.614	0.612	0.696	0.452	0.468	0.548	0.529	0.677	0.883	0.755	0.571	0.547	0.56	0.797	0.449	0.597	0.464	0.248	0.736	0.662	0.627	0.52	0.692	0.57	0.69	0.926	0.599
2068	774.945	313.0769607	315.0827277	79.01864073	2.005766962	9523.285714	1	1	0.827	0.568	0.643	0.591	1.044	0.829	1.004	0.641	1.029	0.867	0.828	0.484	1.402	1.046	0.875	0.839	0.948	1.058	1.088	0.95	0.76	0.605	0.895	0.599	0.917	1.032	0.991	0.959	0.455	0.586	0.975	0.967	1.19	1.252	0.98	0.626	0.607	0.635	0.942	0.735	0.569
2069	774.9911463	324.0897769	326.0964481	180.0629137	2.006671222	10730.27642	2	2	0.458	0.1	0.411	0.186	0.422	0.215	0.292	0.164	0.296	0.332	0.481	0.264	0.593	0.199	0.395	0.197	0.244	0.221	0.289	0.223	0.491	0.346	0.618	0.287	0.52	0.292	0.409	0.35	1.011	0.986	0.297	0.851	0.178	0.176	0.444	0.5	0.168	0.174	0.232	0.185	0.103
2070	776.2215	633.1706131	635.1764873	399.1122931	2.00587414	3288	1	1	2.183	1.787	1.427	1.021	1.477	1.321	1.253	0.911	1.874	1.566	2.201	1.723	1.741	1.71	2.164	1.988	1.703	1.724	1.557	1.424	1.218	1.001	2.028	1.514	1.47	1.636	1.026	1.232	1.316	1.98	1.235	1.461	1.24	0.987	1.055	1.818	1.654	1.55	0.966	1.062	1.02
2071	776.706	402.5627091	404.5687773	168.5043891	2.006068264	2338	1	1	0.467	0.708	0.666	0.831	0.741	0.943	0.499	0.745	0.69	0.575827628	0.664	0.603	0.406	0.709	0.622	1.20539589	0.918	1.361	0.66	0.897	0.425	0.898509327	0.465	0.965	0.766	1.058	0.7	0.616	0.548	1.027	0.583	0.41	0.926	0.923	0.569	0.82	0.865	0.766	0.799	0.695	0.794
2072	777.0449156	515.0394296	517.0455755	280.9811096	2.006145843	17683.18117	1	1	0.331	0.269	0.406	0.331	0.31	0.307	0.982	0.906	0.57	0.741	0.785	0.839	0.455	0.433	0.681	0.751	0.477	2.057	0.891	1.069	0.571	0.646	0.522	0.394	0.642	0.741	0.808	0.916	0.534	0.589	0.533	0.963	0.299	0.278	0.335	0.31	0.364	0.361	0.978	0.957	0.616
2073	777.066542	300.085022	302.0917165	132.0534041	2.006694418	9169.022901	2	2	1.277	0.905	0.591	0.478	0.948	0.874	1.027	0.812	1.294	0.842	0.92	0.822	1.012	1.059	0.764	1.009	1.209	1.149	0.794	0.944	0.892	0.984	0.791	0.637	0.893	1.242	0.747	0.856	0.556	0.554	1.055	1.168	0.777	0.994	1.011	0.633	1.517	1.4	1.123	1.196	0.726
2075	777.2211888	381.0931521	383.0995414	147.0348321	2.006389353	110639.949	1	1	0.874	0.952	1.061	0.272	0.308	0.992	0.596	0.307	0.838	0.205	0.103	0.179	0.1	0.372	0.209	0.682	3.371	0.531	0.628	0.455	1.095	0.81	0.679	0.663	0.1	0.393	0.104	0.227	0.753	0.643	0.31	0.258	0.899	0.934	0.14	0.209	1.301	1.305	1.535	1.583	1.571
2077	778.919603	462.2053117	464.2119045	228.1469917	2.006592811	23593.04523	1	1	0.634	0.45	0.645	0.46	0.636	0.416	0.55	0.386	0.476	0.499	1.097	0.908	0.784	0.607	0.638	0.542	0.666	0.331	0.735	0.671	0.53	0.374	0.427	0.319	0.352	0.331	0.465	0.462	0.597	0.657	0.384	0.18	1.045	1.008	1.097	0.52	0.525	0.519	0.393	0.363	0.362
2079	779.4305941	355.0692732	357.0757404	242.0219063	2.006467263	447746.6832	2	2	0.469	0.83	0.772	0.922	0.753	1.007	0.485	0.81	0.749	0.6	0.738	0.642	0.462	0.781	0.683	1.173	0.967	1.198	0.631	1.147	0.415	0.919	0.471	0.968	0.763	1.106	0.703	0.724	0.603	0.974	0.581	0.382	0.896	0.941	0.663	0.89	0.839	0.809	0.811	0.828	0.763
2080	779.431295	373.0434006	375.049916	277.9701612	2.006515404	16964.82	2	2	0.469	0.752	0.722	0.9	0.681	0.895	0.466	0.802	0.751	0.567	0.718	0.597	0.46	0.747	0.644	1.105	0.994	1.188	0.581	1.127	0.399	0.882	0.436	0.921	0.801	1.077	0.728	0.726	0.588	0.907	0.587	0.346	0.901	0.866	0.658	0.87	0.822	0.772	0.793	0.725	0.721
2081	779.4645163	354.069998	356.0766425	240.0233561	2.006644438	2337237.758	2	2	0.439	0.789	0.735	0.912	0.746	0.957	0.446	0.752	0.716	0.557	0.716	0.628	0.441	0.739	0.678	1.078	0.896	1.122	0.601	1.058	0.391	0.877	0.456	0.959	0.741	1.043	0.703	0.685	0.57	0.937	0.549	0.344	0.862	0.883	0.641	0.888	0.821	0.819	0.746	0.83	0.726
2082	779.7712368	402.5624443	404.5688596	337.0082487	2.006415291	6255.631579	2	2	0.467	0.724	0.666	0.831	0.741	0.869	0.499	0.735	0.69	0.605	0.651	0.55	0.406	0.671	0.622	1.185	0.918	1.279	0.66	0.867	0.425	0.778	0.465	0.887	0.766	1.034	0.676	0.615	0.548	1.027	0.583	0.41	0.926	0.939	0.58	0.82	0.865	0.766	0.799	0.695	0.794
2083	779.9279286	583.2581831	585.2642357	349.1998631	2.006052673	10355.71429	1	1	0.38	0.38	0.333	0.38	0.657	0.38	0.506	0.336	0.38	0.38	0.38	0.38	0.38	0.305	0.38	0.38	1.649	0.38	0.4	0.38	0.38	0.38	0.38	0.38	0.369	0.38	0.38	0.690268494	0.361	0.38	0.38	0.38	0.38	0.322	0.38	0.38	1.397	1.474	2.83	2.848	1.87
2084	780.80225	434.1742231	436.1803799	200.1159031	2.006156723	7691.5	1	1	0.654	0.732	1.044	1.058	0.471	0.436	0.691	0.622	0.28	0.433322692	0.429	0.489842226	0.552	0.634	0.502	0.28	1.943	0.664038453	0.628	0.555	0.28	0.45352311	0.28	0.28	0.769	0.851	0.38	0.28	0.67	0.642	0.429	0.738	0.778	0.649	0.489	0.581	1.819	2.033	4.202	4.247	2.447
2085	781.2059504	437.1369826	439.1435176	203.0786626	2.00653495	18004.1844	1	1	0.715	0.4	0.66	0.342	0.677	0.558	0.678	0.511	0.69	0.492	0.686	0.538	0.78	0.748	0.799	0.653	0.775	0.692	0.844	0.645	1.126	0.857	1.17	0.959	0.853	0.844	0.759	0.894	2.427	2.302	0.77	0.723	0.559	0.536	0.658	0.795	0.694	0.604	0.895	0.799	0.527
2091	784.2342727	466.17711	468.1835366	464.2375799	2.006426639	1994.727273	2	2	0.636	0.833	0.501	0.663	0.4	0.334	0.456	0.539	0.339	0.286	0.69	0.69	0.875	0.926	0.69	0.29	0.319	0.69	0.488	0.69	9.99	9.99	3.3	3.061	0.39	0.356	0.69	0.69	0.417	0.47	0.69	0.69	3.067	2.371	2.079	0.464	0.69	0.86939726	0.731	1.085	0.575
2092	784.369	708.2100975	710.2150013	474.1517775	2.004903809	3632	1	1	0.443	0.419	0.26	0.228	0.26	0.26	0.772	0.757	2.028	1.704	1.889	1.739	0.71	0.52	2.415	2.165	0.529	2.283	1.071	0.805	0.878	0.835	2.147	1.963	0.276	0.312	0.22	0.26	0.26	0.26	0.182	0.26	0.26	0.26	0.26	0.547	1.757	1.857	3.443	3.35	2.317
2093	785.5383195	457.0635413	459.0700128	446.0104425	2.006471577	2225.112426	2	2	0.595	0.57	0.553	0.737	0.521	0.658	0.499	0.559	0.596	0.565	0.457	0.671	0.57	0.57	0.61	0.539	0.595	0.703	0.825	0.756	0.627	0.74	0.747	0.768	0.526	0.562	0.686	0.667	0.54	0.528	0.392	0.449	0.554	0.57	0.555	0.514	0.547	0.627846061	0.536	0.57	0.5
2094	785.7498196	378.100042	380.1065077	144.041722	2.006465635	36487.72165	1	1	0.701	0.789	0.697	0.734	0.808	0.675	0.726	0.562	0.711	0.852	0.731	0.646	0.923	0.968	0.776	0.766	0.762	0.852	0.862	0.793	1.258	1.142	1.221	1.104	0.888	1.031	0.797	1.034	2.228	2.717	0.642	0.913	0.739	0.739	0.557	0.655	0.684	0.666	1.022	1.025	0.648
2095	785.9533485	387.0994773	389.1059699	153.0411573	2.006492585	12430.75758	1	1	0.41	0.388	1.336	1.241	1.162	0.853	1.302	1.203	0.8	0.598	0.831	0.604	1.306	0.968	0.695	0.567	0.604	0.552	0.932	0.38	0.486	0.49	0.737	0.626	1.188	1.082	1.511	1.484	0.636	0.605	0.935	0.861	1.238	1.162	1.305	0.568	0.666	2.634443803	0.787	2.173	0.516
2096	785.966	685.2181594	687.2255536	451.1598394	2.00739416	3210	1	1	0.673	0.804	0.79	0.785	0.659	0.648	0.617	0.536	0.725	0.636	0.734	0.633572466	0.974	0.826	0.89	0.874	0.883	0.735	0.921	0.875	1.296	1.033621314	1.171	1.041	0.86	0.79	0.708	1.089	1.83	2.124	0.742	0.862	0.726	0.962	0.617	0.634	0.674	0.781	1.286	1.077	0.688
2097	786.4815	622.1608811	626.1730061	155.0515411	4.012125027	2191	1	2	0.387	0.379	1.529	1.416	1.218	0.863	1.43	1.225	0.958	0.862	0.867	0.649	1.608	1.233	0.765	0.616	0.781	0.635	0.998	1.074	0.611	0.529	0.837	0.618	1.318	1.135	1.65	1.902	0.744	0.701	1.055	1.003	1.382	1.31	1.377	0.677	0.739	0.997	0.931	1.132	0.491
2098	786.4957	476.1591835	478.1658831	242.1008635	2.006699642	2611.4	1	1	0.73	0.691	1.497	1.137	0.905	0.792	1.378	1.189	0.303	0.564792763	0.667	0.769	1.205	0.974	0.16	0.16	0.439	0.583	0.876	0.548726515	0.374	0.606770794	0.401	0.16	1.288	1.114	0.373	0.512166669	0.946	1.053	0.331	0.16	1.386	1.312	1.511	0.538	0.16	0.16	0.217	0.16	0.63
2101	787.1018636	355.1089245	357.1160359	242.1012091	2.007111372	4710.272727	2	2	0.584	0.803	1.633	1.239	0.763	0.843	1.503	1.186	0.295	0.53	0.667	0.679	1.107	0.93	0.219	0.288	0.385	0.602	0.816	0.878	0.28	1.01	0.346	0.328	1.082	1.341	0.27	0.33	0.786	1.059	0.17	0.13	1.528	1.617	1.216	0.441	0.296	0.446	0.25	0.813180496	0.663
2106	789.2158395	312.0826163	314.0890728	156.0485926	2.006456514	6070.246914	2	2	0.343	0.347	1.306	1.249	1.171	0.755	1.224	1.096	0.842	0.716	0.759	0.707	1.441	1.061	0.701	0.533	0.663	0.55	0.815	0.941	0.567	0.613	0.699	0.649	1.219	1.129	1.363	1.83	0.679	0.618	0.786	0.906	1.287	1.27	1.259	0.524	0.684	1.059	0.742	0.914	0.479
2107	789.2718889	385.0890405	387.0977403	151.0307205	2.008699826	24019.22222	1	1	1.949	0.621	0.842	0.508	1.133	0.925	0.922	0.826	1.586	0.946	1.518	1.528	0.959	1.066	1.807	1.288	1.953	1.507	1.381	1.661	2.748	1.516	1.588	1.665	1.046	1.129	0.834	0.746	1.958	2.03	1.478	1.323	0.811	2.13	0.946	2.216	1.687	9.99	1.352	9.99	1.935
2108	789.437486	416.1156264	418.1223137	182.0573064	2.006687301	122090.0093	1	1	0.615	0.683	0.713	0.75	0.516	0.392	0.635	0.549	0.559	0.499	0.811	0.622	1.079	0.933	0.982	0.783	0.666	0.929	0.885	0.894	0.688	0.603	0.652	0.592	0.489	0.45	0.558	0.61	0.664	0.752	0.303	0.142	0.51	0.502	0.499	1.022	0.732	0.711	0.577	0.597	0.716
2111	791.0794815	354.0688418	356.0753464	240.0210435	2.006504681	37897.51852	2	2	0.452	0.795	0.73	0.893	0.713	0.944	0.458	0.722	0.743	0.567	0.712	0.603	0.442	0.718	0.678	1.061	0.943	1.112	0.613	1.038	0.413	0.827	0.444	0.932	0.71	1.032	0.66	0.69	0.563	0.907	0.566	0.344	0.894	0.859	0.63	0.895	0.803	0.837	0.752	0.837	0.756
2112	792.6316667	462.1688956	464.175267	228.1105756	2.006371393	3543.2	1	1	2.102	2.36	1.012	0.717	0.425	0.3	0.777	0.72	0.536	0.525	1.007	0.795	0.72	0.758	0.407	0.381	1.418	0.409	0.55	0.437	0.46	0.301	0.526	0.487	0.625	0.684	0.455	0.523	0.846	0.859	0.367	0.622	0.742	0.255	0.362	0.422	0.634	0.668	0.293	0.325	1.806
2115	793.4379474	621.1580206	625.1713725	154.0486806	4.013351906	9297.157895	1	2	0.342	0.365	1.437	1.307	1.13	0.786	1.34	1.165	0.848	0.611	0.776	0.56	1.4	0.98	0.7	0.486	0.65	0.519	0.927	0.761	0.554	0.378	0.743	0.532	1.242	1.05	1.571	1.732	0.633	0.636	0.946	0.814	1.266	1.302	1.36	0.541	0.67	0.784	0.749	0.751	0.457
2117	793.9878889	311.0824753	313.0890386	154.0483105	2.006563341	22388.44444	2	2	0.318	0.314	1.29	1.217	1.127	0.677	1.288	1.052	0.833	0.654	0.751	0.517	1.194	1.018	0.653	0.531	0.569	0.532	0.828	0.857	0.526	0.435	0.655	0.48	1.101	1.081	1.396	1.461	0.566	0.534	0.823	0.816	1.177	1.26	1.219	0.461	0.62	0.646	0.729	0.739	0.39
2123	796.213	376.1143356	378.1210572	142.0560156	2.006721592	9176	1	1	1.129	1.124	1.325	1.288	0.965	0.871	0.943	0.873	0.561	0.439	0.729	0.538912931	1.128	1.103	0.411	0.321	0.162	0.73838518	0.937	0.938926587	0.1001	0.1001	0.34	0.337	0.871	1.03	0.415	0.464	1.249	1.207	0.318	0.144	1.29	1.756	1.263	0.546	0.259	0.179	0.277	0.1001	0.177
2125	797.0078333	403.1430795	405.1496889	169.0847595	2.006609406	3258.333333	1	1	1.885	1.62	1.42	1.198	1.253	1.367	0.411	0.252	1.219	1.306	2.139	2.015991035	1.049	0.945	0.855	0.838	1.731	1.484	1.431	1.524	0.538	0.486	0.841	0.68	0.636	0.736	0.376	0.351	0.331	0.338	0.61	1.22	0.57	0.546	0.569	1.337	2.346	2.485	0.599	0.648	1.216
2130	797.5656	293.1315066	295.1381099	59.07318661	2.006603266	4378.8	1	1	1.161	0.714	0.537	0.779	1.04	0.468	1.145	0.761	1.186	0.986	1.087	0.773	1.235	0.637	1.13	0.696	2.746	0.605	0.847	0.509	1.576	1.663	1.565	1.025	1.806	0.753	0.581	1.992	0.842	0.834	0.828	0.587	1.045	1.168	1.082	0.671	1.358	1.44	0.799	0.882	0.671
2132	797.7798098	327.6060249	329.6126568	187.0954098	2.006631876	4479.040752	2	2	1.616	1.562	1.176	0.953	1.115	1.315	0.195	0.159	1.05	1.274	2.228	2.105	0.926	0.876	0.784	0.843	2.109	1.722	1.55	1.561	0.384	0.392	0.644	0.58	0.624	0.654	0.18	0.228	0.257	0.183	0.51	0.988	0.405	0.391	0.442	1.002	2.47	2.574	0.511	0.519	1.087
2134	798.182	377.1528245	379.1589917	143.0945045	2.006167184	2718	1	1	0.634	0.984	0.941	0.809	0.821	0.603	1.117	1.354	0.832	0.933	1.02	1.135	0.764	0.773	0.84	1.016	0.67	1.47	2.05	1.299	1.479	1.881	1.673	1.311	1.473	1.476	1.166	1.75	0.689	0.943	1.471	1.15	0.844	0.84	0.936	0.7	0.669	0.575	1.362	1.03	0.9
2136	798.1920187	318.6006612	320.6072806	169.0846823	2.006619426	6942.971963	2	2	1.927	1.607	1.303	1.062	1.517	1.464	0.241	0.142	1.122	1.329	2.219	2.167	1.001	1.09	0.862	0.744	2.115	1.5	1.438	1.465	0.388	0.427	0.716	0.624	0.691	0.689	0.159	0.192	0.194	0.189	0.512	1.153	0.451	0.458	0.45	1.06	3.174	3.063	0.476	0.485	1.179
2141	798.7113957	364.0843401	366.0909081	130.0260201	2.006567944	8105.280576	1	1	0.439	0.416	0.527	0.398	0.635	0.648	1.077	0.887	1.11	0.663	0.616	0.861	0.692	1.033	0.682	0.973	0.261	0.813	0.873	0.783	0.912	0.862	0.605	0.512	0.914	1.285	0.914	1.179	0.605	0.707	1.387	1.262	0.362	0.333	0.343	0.469	0.255	0.306	1.261	1.318	1.001
2144	798.752	705.286244	707.2935254	471.227924	2.007281451	4655	1	1	0.783	1.006	1.532	1.639	0.81	0.587	0.544	0.663	0.766	0.606	0.75	0.602	1.596	1.24	1.447	1.337	1.393	0.731	0.92	0.999775281	0.16	0.206	0.455	0.774	1.406	1.708	1.061	1.133	0.757	1.096	0.432	0.17	1.172	0.999775281	0.751	1.481	0.86	0.999775281	1.289	0.999775281	0.961
2145	798.8732179	518.1697449	520.1762542	284.1114249	2.00650929	6160.25641	1	1	0.936	1.208	1.622	1.308	1.206	0.964	0.9	0.832	0.414	0.355	0.762	0.613	1.356	1.24	0.465	0.322	0.204	0.726	1.123	0.901	0.2	0.2	0.411	0.42	0.813	0.916	0.515	0.459	1.47	1.417	0.399	0.217	1.56	1.69	1.32	0.637	0.136	0.2	0.133	0.2	0.156
2148	799.0414865	704.7881741	706.7946363	470.7298541	2.006462242	4640.108108	1	1	0.86	0.84	1.304	1.748	0.724	0.654	0.732	0.552	0.823	0.53	0.653	0.585	1.437	1.151	1.45	0.84	1.211	0.549	1.074	0.916488764	0.22	0.22	0.602	0.393	1.513	1.478	0.914	1.117	0.698	0.806	0.328	0.22	0.994	0.916488764	0.802	1.324	0.717	0.916488764	1.118	0.916488764	0.844
2149	799.099878	584.2236568	588.2374302	117.1143168	4.013773454	6394	1	2	1.173	1.201	1.219	1.16	1.485	1.038	1.355	0.859	1.385	0.876	1.208	0.875	1.714	1.181	1.545	1.303	2.088	1.4	1.568	1.218	1.658	1.049	1.706	1.182	1.737	1.516	1.261	1.067	1.157	1.36	1.148	1.041	1.249	1.192	1.105	1.188	1.203	1.223	1.582	1.607	1.088
2150	799.1327684	322.074016	324.0805241	88.01569598	2.006508095	15131.71751	1	1	0.83	0.832	0.818	0.743	0.791	0.728	0.704	0.531	1.337	0.822	0.904	0.781	0.901	0.958	0.688	0.755	1.05	0.919	1.045	1.1	0.825	0.767	0.849	0.598	0.774	0.941	0.586	0.657	0.521	0.552	0.724	0.926	0.548	0.544	0.556	0.728	1.747	1.712	0.773	0.845	0.68
2153	799.5832647	369.106751	371.1133582	270.0968621	2.006607173	6497.882353	2	2	1.322	1.625011137	0.462	0.568	0.496	0.56	0.598	0.669	0.262	0.56	0.462	0.61031807	0.653	0.703830088	0.584	0.56	0.643	0.56	0.387	0.804263326	0.508	0.804263326	0.479	0.56	0.589	0.54	0.453	0.56	0.36	0.56	0.714	1.392	0.676	0.71	0.368	0.56	0.512	0.56	0.339	0.804263326	1.184
2154	799.6714636	534.2048719	536.2115378	300.1465519	2.006665988	11864.58182	1	1	0.697	0.822	0.701	0.759	0.505	0.679	0.516	0.519	0.77	0.616	0.658	0.694	0.645	0.674	0.666	0.715	0.721	0.728	0.594	1.075	0.669	0.765	0.709	0.689	0.628	0.781	0.646	0.589	0.689	0.678	0.698	0.656	0.533	0.48	0.542	0.684	0.554	0.667327957	0.704	0.667327957	0.619
2155	799.7752353	716.304354	720.3183664	249.195014	4.014012435	7314.352941	1	2	0.475	0.541	0.467	0.469	0.605	0.442	0.543	0.465	0.519	0.509	0.586	0.409	0.648	0.672	0.639	0.627	0.933	0.639	0.617	0.628	0.619	0.624	0.641	0.573	0.726	0.684	0.548	0.548	0.471	0.487	0.41	0.412	0.476	0.501	0.534	0.449	0.561	0.429	0.714	0.68	0.448
2156	799.9995085	376.1144116	378.121109	284.1121833	2.006697388	19023.76271	2	2	1.129	1.215	1.325	1.288	0.965	0.871	0.943	0.831	0.561	0.373	0.729	0.582	1.109	1.125	0.411	0.33	0.162	0.71	0.937	0.939	0.1001	0.1001	0.34	0.315	0.871	1.073	0.415	0.464	1.249	1.207	0.318	0.144	1.29	1.756	1.263	0.546	0.259	0.179	0.277	0.1001	0.177
2158	800.327	705.2882674	707.2955749	942.4598949	2.007307419	4170	2	2	0.7	0.919	1.542	1.622	0.896	0.623	0.754	0.638	0.784	0.606	0.739	0.558	1.542	1.315	1.598	1.288	1.182	0.731	0.961	0.984325843	0.16	0.206	0.69	0.733	1.691	1.847	0.997	1.301	0.661	1.065	0.432	0.17	1.105	0.984325843	0.746	1.426	0.823	0.984325843	1.255	0.984325843	0.852
2159	802.3385981	402.1000762	404.1066907	168.0417562	2.006614532	295133.9809	1	1	0.839	0.485	0.447	0.373	0.566	0.34	0.328	0.289	0.619	0.479	0.626	0.45	0.862	0.532	0.457	0.294	0.524	0.336	0.279	0.277	0.529	0.464	0.676	0.403	0.39	0.414	0.483	0.746	0.546	0.41	0.531	0.545	0.36	0.396	0.544	0.518	0.496	0.482	0.378	0.393	0.389
2160	804.8653281	349.1576205	351.1641668	115.0993005	2.006546211	49113.04777	1	1	0.283	0.325	0.4	0.398	0.267	0.227	1.285	1.051	0.493	0.422	2.195	1.902	0.226	0.208	1.293	1.193	0.282	1.255	0.395	0.394	0.541	0.484	0.405	0.331	0.428	0.487	0.293	0.356	0.138	0.169	0.244	0.318	0.476	0.476	0.453	0.432	1.908	1.913	0.408	0.385	0.352
2161	805.1860645	307.0929404	309.0994122	146.0692408	2.006471865	210372.1935	2	2	1.052	0.658	0.789	0.602	0.82	0.791	0.615	0.711	0.495	0.913	0.679	0.97	0.479	0.621	0.743	1.018	0.652	1.195220571	0.798	0.98	0.817	1.243	0.804	0.724	0.713	1.065	0.405	0.532	0.82	0.417	0.641	4.282	0.65	0.46	0.469	0.617	0.671	0.555	0.957	0.847	0.82
2162	810.844713	501.1139095	505.1272941	34.00456948	4.013384633	90950.01852	1	2	0.469	0.682	0.487	0.544	0.5	0.442	0.511	0.429	0.541	0.452	0.444	0.438	0.598	0.622	0.513	0.545	0.706	0.616	0.536	0.626	0.587	0.565	0.591	0.532	0.628	0.636	0.517	0.561	0.536	0.549	0.481	0.387	0.423	0.428	0.445	0.509	0.398	0.397	0.54	0.53	0.465
2165	815.6595	335.6219123	337.6287505	203.1271846	2.00683819	2656	2	2	0.767	0.889	0.889	0.919	0.856	0.797	1.007	0.789	0.689	0.405	0.628	0.574890424	0.91	1.336	0.591	0.386	1.255	0.863	0.788	0.733452523	0.849	0.923337755	1.03663167	0.504425815	1.168	1.386	0.552216646	0.882010477	0.732	0.727	1.026	0.7	1.391	0.947	1.372	0.789	1.136	0.916533864	0.751	0.975748341	1.316
2166	815.663	297.0835656	299.0903231	126.0504911	2.006757536	3128	2	2	0.4	0.43	1.2	1.353	1.879	0.935	1.161	1.371	0.672	0.771	0.768	0.592	1.242	0.938	0.554	0.634	1.178	0.584	1.049	0.814	0.491	0.485	0.874	0.724	1.123	1.123	1.694269195	1.656	0.954	0.784	1.070843819	0.997	1.338	1.214	1.277	0.573	0.765	0.754	0.855	0.899	0.436
2167	816.3931957	267.055627	269.0623268	32.997307	2.006699789	11014.3913	1	1	0.49	0.724	0.512	0.59	0.526	0.427	0.561	0.458	0.576	0.473	0.461	0.488	0.636	0.605	0.508	0.6	0.791	0.653	0.596	0.704	0.608	0.567	0.606	0.579	0.617	0.638	0.508	0.591	0.563	0.59	0.47	0.434	0.461	0.479	0.441	0.533	0.415	0.435	0.574	0.573	0.476
2168	816.669	354.0654135	356.0715756	240.0141871	2.006162105	3106	2	2	0.469	0.757	0.609644177	0.788	0.824	0.883	0.554354716	0.757	0.728963701	0.572	0.921	0.642	0.551817552	0.715	0.788	1.124	1.24	1.137	0.757234997	1.011	0.488712761	0.817	0.433	0.958	0.887975549	1.06	0.729969863	0.769	0.913	0.884960647	0.566486896	0.511	1.093395599	0.455421915	0.623	0.779002235	0.848794424	0.815006581	1.51	0.752397044	0.64459152
2170	817.5315294	311.0603072	313.0667942	154.0039743	2.006487031	4098.823529	2	2	0.513	0.783	0.48	0.555	0.487	0.519	0.531	0.419	0.554	0.518	0.505	0.428	0.648	0.721	0.569	0.543	0.793	0.728	0.647	0.562	0.596	0.617	0.713	0.581	0.704	0.627	0.557	0.562	0.63	0.522	0.42	0.431	0.506	0.399	0.554	0.591	0.475	1.048	0.589	0.868	0.432
2174	818.1701228	462.2051464	464.2118221	228.1468264	2.006675692	3974.45614	1	1	0.84	0.836	1.15	1.643	0.819	0.654	0.913	0.859	0.981	0.371	1.011	0.604	0.932	1.173	0.567	0.474	1.991	0.729	0.881	0.792	3.919	2.434	1.165	1.189	1.157	1.557	0.938	0.393	0.883	1.017	0.321	0.451	0.964	0.838	0.875	0.981	0.918	0.69	2.391	2.896	2.796
2175	818.2750642	365.1157155	367.1229556	131.0573955	2.007240122	21447.45556	1	1	0.625	0.18	0.266	0.1	0.122	0.128	0.188	0.163	0.1	0.114	0.146	0.156693253	0.1	0.121	0.216	0.220572817	0.151	0.183272378	0.142	0.213	0.231	0.253	0.136	0.116	0.1	0.151	0.122	0.121	0.147	0.212	0.15	0.248	0.11	0.157	0.105	0.172	0.111	0.159	0.207	0.315	0.181
2178	818.772	501.1148969	505.128149	34.00555693	4.013252033	101128	1	2	0.471	0.687	0.492	0.545	0.497	0.441	0.504	0.432	0.545	0.454	0.442	0.438	0.597	0.616	0.515	0.548	0.704	0.627	0.541	0.64	0.588	0.562	0.594	0.52	0.63	0.636	0.522	0.559	0.536	0.551	0.481	0.389	0.425	0.444	0.44	0.506	0.401	0.404	0.541	0.524	0.455
2180	818.8303333	290.5469325	292.5534253	112.977225	2.006492797	3361	2	2	0.519	0.768	0.507	0.552	0.481	0.505	0.65	0.449	0.657	0.53	0.544	0.438	0.677	0.626	0.628	0.601	0.909	0.594	0.634	0.914	0.685	0.584	0.903	0.511	0.634	0.676	0.621	0.625	0.443	0.517	0.502	0.439	0.558	0.461	0.503	0.616	0.389	0.6	0.64	0.75	0.474
2181	819.2740974	425.1161149	427.1227346	191.0577949	2.006619738	8066.243836	1	1	0.657	0.872	0.529	0.549	0.566	0.708	0.659	0.713	0.903	0.803	0.805	0.784	1.002	1.099	1.147	0.932	0.681	0.799	1.085	0.905	0.749	0.695	1.194	0.797	0.953	0.962	1.049	0.899	0.662	0.784	0.59	0.522	0.738	0.675	0.809	0.556	0.573	0.653	0.749	0.585	0.444
2183	819.474	353.0894638	355.098675	238.0622875	2.009211219	4092.666667	2	2	0.582	0.374	0.433	0.341	0.363	0.4	0.415	0.34	0.391	0.36	0.478	0.466	0.484	0.512	0.398	0.403	0.297	0.346	0.42	0.835	0.452	0.402	0.428	0.444	0.338	0.456	0.322	0.376	0.306	0.392	0.322	0.718	0.451	0.727	0.423	0.258	0.312	0.582	0.404	0.497	0.296
2185	820.233158	393.1257934	395.132431	159.0674734	2.006637553	6601.178909	1	1	0.717	0.806	0.651	0.672	0.706	0.624	0.559	0.587	0.742	0.568	0.815	0.799	0.871	0.868	0.716	0.751	0.672	0.687	0.707	0.813	0.685	0.781	0.686	0.637	0.655	0.824	0.758	0.778	0.698	0.721	0.693	0.967	0.61	0.579	0.621	0.739	0.59	0.613	0.712	0.694	0.623
2186	820.5142997	352.5905022	354.597488	237.0643644	2.006985828	11463.58788	2	2	0.348	0.297	0.31	0.239	0.274	0.242	0.324	0.286	0.282	0.283	0.319	0.295	0.293	0.364	0.276	0.311	0.274	0.344	0.27	0.381601098	0.323	0.353	0.325	0.298	0.255	0.31	0.246	0.328	0.201	0.297	0.267	0.49	0.29	0.347	0.246	0.279	0.236	0.24	0.275	0.61	0.214
2187	821.338	577.7477013	579.752976	687.3787626	2.005274726	1684	2	2	1.396	2.32	1.592	2.076	1.338	1.602	1.016	1.205	0.601	0.682	1.127	0.946	1.469	2.005	0.311	0.542	0.269	1.287	1.14	1.646	0.904	1.292	0.588	0.813	1.195	1.649	0.567	0.765	1.122	1.811	0.375	0.844	2.572	2.781	1.778	0.655	0.19	0.19	0.19	0.19	0.702
2189	822.0879031	501.1145976	505.1280015	34.00525762	4.013403908	30787.09663	1	2	0.472	0.687	0.497	0.544	0.497	0.439	0.506	0.432	0.545	0.444	0.442	0.428	0.597	0.612	0.519	0.549	0.708	0.625	0.54	0.606	0.589	0.568	0.603	0.519	0.63	0.636	0.521	0.575	0.538	0.549	0.48	0.391	0.424	0.444	0.441	0.506	0.399	0.417	0.536	0.534	0.455
2190	822.644	354.0694956	356.0755725	120.0111756	2.006076894	2790	1	1	0.47	0.783976665	0.737	0.847	0.763	0.985	0.505	0.635	0.766	0.595	0.742	0.532520624	0.454	0.81	0.673	0.995	0.968	0.707	0.628	0.778	0.497	0.757367115	0.458	0.85	0.751	0.996	0.72	0.717	0.56	0.912	0.568	0.42	0.888	0.87	0.618	0.84	0.733	0.84	0.779	0.843	0.69
2192	823.4425	551.2307172	553.2372864	317.1723972	2.006569199	2367.8	1	1	0.717	0.742	0.512	0.621	1.005	0.762	0.54	0.601	0.81	0.566	0.944	0.842	1.061	1.099	0.624	0.46	0.814	0.634	0.966	0.807	0.859	0.866	0.826	0.822	0.863	0.806	0.789	1.016	0.437	0.551	0.514	0.239	0.851	0.987	0.834	0.554	0.467	0.542	0.597	0.64	0.486
2197	823.9951667	457.0643837	459.0707773	446.0121274	2.006393606	2227.166667	2	2	0.582	0.57	0.592	0.75	0.486	0.664	0.522	0.56	0.563	0.533	0.51	0.725	0.801	1.075647821	0.582	0.609	0.611	0.695	0.815	0.765	0.595	0.653	0.695	0.699	0.538	0.542	0.728	0.703	0.497	0.529	0.425	0.464	0.606	0.935	0.585	0.541	0.55	0.631583826	0.517	0.57	0.509
2202	827.1983333	361.0780077	363.0847224	127.0196877	2.006714725	4040.666667	1	1	0.424	0.642	0.927	0.529	0.684	0.737	0.472	0.439	0.845	0.588	0.76	0.439	0.484	0.702	0.73	1.005	0.993	0.663	0.61	0.924	0.497	0.718	0.698	1.025	0.852	1.323	0.552	0.651	0.558	0.839	0.499	0.211	1.033	1.022	0.688	0.754	0.653	0.625	0.712	0.662	0.651
2204	827.9836667	391.2841371	393.2871747	157.2258171	2.003037621	2824.666667	1	1	3.351	9.718	3.088	5.752	2.436	4.761	2.953	9.99	2.614	9.99	3.4	9.022	3.915	7.004	2.176	5.466924757	2.129	8.5	2.539	6.97	2.389	4.822194952	4.061	7.8	2.837	9.652	1.547	9.168	2.727	0.834	3.008	1.508	3.592	0.349	3.036	3.252	2.721	0.419	3.674	0.818	2.231
2206	828.8760828	344.6029546	346.6096228	221.0892692	2.006668234	8128.662069	2	2	0.687	0.636	0.648	0.525	0.731	0.536	0.686	0.413	0.633	0.538	0.587	0.515	0.922	0.83	0.864	0.683	0.769	0.717	0.7	0.658	1.254	0.836	1.148	0.944	0.804	0.826	0.666	0.779	2.033	2.538	0.623	1.335	0.653	0.639	0.616	0.675	0.637	0.621	0.919	1.105	0.546
2213	829.5242718	324.0899239	326.0965668	180.0632078	2.006642845	7163.088124	2	2	0.398	0.137	0.346	0.119	0.383	0.219	0.323	0.107	0.4	0.211	0.298	0.156	0.414	0.225	0.287	0.164	0.287	0.175	0.363	0.188	0.498	0.251	0.662	0.297	0.436	0.378	0.327	0.272	1.164	0.915	0.246	2.888	0.243	0.227	0.368	0.399	0.227	0.325	0.331	0.507	0.223
2215	829.77525	331.1116023	333.1179621	97.05328233	2.006359789	7359	1	1	1.037	0.618	0.854	0.625	0.67	0.695	0.642	0.496	0.64	0.781	0.919	0.91	0.792	0.825	0.715	0.698	0.673	0.693	0.717	0.831	0.786	0.93	0.659	0.574	0.477	0.523	0.455	0.535	0.486	0.549	0.394	1.303	1.097	1.134	1.143	0.538	0.476	0.456	0.468	0.453	0.327
2217	829.9632258	308.0946443	310.1012761	74.03632433	2.006631734	11938.12903	1	1	0.419	0.484	1.116	0.968	1.306	0.933	0.508	0.355	0.675	0.616	0.719	0.512	1.022	0.727	1.292	1.104	0.321	0.951	0.697	0.623	1.56	1.302	1.567	1.23	1.062	0.945	0.576	0.706	1.287	1.555	0.639	0.807	0.579	0.553	0.578	0.539	0.571	0.578	0.949	1.054	0.337
2218	829.967	354.069175	356.0759968	120.010855	2.006821812	4462	1	1	0.459	0.771	0.742	0.638	0.694	0.722	0.503	0.762	0.74	0.24	0.699	0.234	0.454	0.232	0.675	1.107	0.937	0.724	0.624	0.856	0.489	0.443	0.476	1.273	0.738	0.945	0.739	0.56	0.56	0.899	0.568	0.415	0.892	0.873	0.613	0.832	0.715	0.838	0.774	0.841	0.696
2223	831.683	379.1405977	381.1484323	290.1645554	2.007834564	2850	2	2	0.309	0.443	0.581	0.591	0.375	0.226	0.972	0.799183311	0.666	0.451	1.807	2.306	0.266	0.251	1.25	1.18	0.346	1.064	0.508	0.513	0.542	0.341	0.344	0.399	0.428	0.43	0.312	0.269	0.355	0.226716109	0.257	0.177	0.417	0.407	0.466	0.551	1.594	2.122	0.304	0.535	0.406
2224	831.8055	435.1585635	437.1656806	201.1002435	2.007117102	2435	1	1	0.517	0.402	0.581	0.44	0.632	0.38	0.583	0.46	0.637	0.530706892	0.626	0.543036172	0.407	0.447	0.742	0.578	0.28	0.422419327	0.893	0.85	0.515	0.819	0.504	0.454339034	0.66	0.52	0.789	0.45	0.743	0.839	0.781	1.729	0.465	0.571	0.659	0.65	0.35	0.346	0.441	0.304	0.567
2225	832.1096071	319.5901355	321.5967734	171.063631	2.006637924	3628.142857	2	2	0.961	0.724	0.698	0.561	0.718	0.584	0.701	0.694	0.679	0.775	0.591	0.6	0.701	0.641	0.682	0.597	0.542	0.985	0.927	0.731	0.802	0.863	0.854	1.096	1.101	1.294	0.716	0.754	0.459	0.449	0.639	0.352	0.521	0.445	0.646	0.791	0.309	0.342	0.558	0.59	0.235
2226	832.137	378.6401998	380.646494	144.5818798	2.006294266	3138	1	1	0.389	0.413	0.646	0.588	0.237	0.202	0.754	0.827	0.443	0.463	1.592	1.666	0.152	0.169	1.207	1.222	0.212	0.986	0.413	0.411	0.428	0.464	0.299	0.305	0.389	0.447	0.227	0.225	0.114	0.144	0.2	0.11	0.399	0.458	0.371	0.422	1.693	1.777	0.341	0.376	0.308
2229	832.3595	344.6030907	346.6098673	110.5447707	2.006776657	4054	1	1	0.673	0.636	0.67	0.525	0.708	0.503	0.704	0.421	0.652	0.443	0.592	0.61	0.922	0.707	0.836	0.764	0.74	0.714	0.716	0.611	1.121	0.68	1.148	0.927	0.799	0.817	0.661	0.779	2.108	2.528	0.625	1.23	0.64	0.616	0.61	0.733	0.631	0.629	0.919	1.108	0.593
2230	832.5288281	378.6400019	380.646599	289.1633637	2.006597103	6658.455318	2	2	0.389	0.453	0.646	0.579	0.237	0.202	0.754	0.739	0.443	0.451	1.592	1.751	0.152	0.169	1.207	1.177	0.212	0.986	0.413	0.411	0.428	0.455	0.299	0.313	0.389	0.447	0.227	0.225	0.114	0.144	0.2	0.11	0.399	0.458	0.371	0.422	1.693	1.777	0.341	0.376	0.308
2233	834.4936667	349.1576713	351.1642051	115.0993513	2.006533806	147916.6667	1	1	0.279	0.32	0.4	0.394	0.265	0.218	1.29	1.085	0.491	0.418	2.198	1.91	0.216	0.198	1.284	1.176	0.28	1.261	0.392	0.401	0.538	0.515	0.401	0.321	0.428	0.482	0.294	0.359	0.135	0.163	0.238	0.31	0.466	0.479	0.457	0.434	1.908	1.894	0.398	0.384	0.348
2235	834.592	431.1075542	433.1148326	394.0984683	2.007278454	1610	2	2	0.481	0.894	0.666	0.649	0.471	1.009	0.28	0.832	0.787	0.566	0.795	0.867146225	0.573	1.176267927	0.806	0.796817774	0.918	0.697	0.778	1.59	0.551	0.909333832	0.603	0.792	0.45	0.41	0.65	0.478	0.492	0.644	0.461	0.696	0.885	0.761	0.999	0.767	0.777	0.966	0.661	0.28	0.83
2236	834.8002222	345.1011245	347.1079922	222.0856089	2.006867705	2442.539683	2	2	6.079	1.791	4.659	0.594	1.107	0.719	1.318	0.525	1.352	0.581	1.76	0.719	3.212	2.369	1.944	0.804	2.867	1.095	1.126	1.262	2.406	1.006	2.567	1.162	2.084	1.026	2.019	1.047	3.904	1.715	1.402	2.353	1.736	1.679	1.285	1.632	0.736	0.683	0.787	0.869	0.898
2237	835.7135	501.1115296	505.1253507	34.00218964	4.013821075	5965	1	2	0.486	0.682	0.532	0.549	0.459	0.444	0.517	0.434	0.538	0.472	0.421	0.443	0.682	0.614	0.621	0.565	0.839	0.611	0.654	0.582	0.641	0.566	0.657	0.551	0.599	0.653	0.546097847	0.568	0.529	0.574	0.457	0.393	0.41	0.46	0.431	0.53	0.493	0.422024905	0.488	0.567	0.432
2239	836.1645	367.1674787	369.1750282	133.1091587	2.007549491	15356.16667	1	1	0.323	0.318	0.419	0.436	0.321	0.248	1.295	1.081	0.533	0.434	2.246	1.554	0.272	0.226	1.275	1.289	0.323	1.198	0.423	0.4	0.598	0.502	0.433	0.313	0.447	0.513	0.319	0.371	0.182	0.304	0.284	0.304	0.499	0.488	0.489	0.476	1.925	1.902	0.416	0.459	0.393
2241	836.7532308	362.1164671	364.1242165	256.1162942	2.007749395	2191.076923	2	2	0.831	0.19	0.985	0.754	1.085	0.835	1.011	0.869	0.958	0.19	0.893	0.19	1.108	0.19	0.777	0.479	0.43	0.631	1.086	0.824	1.16	1.512	0.693	0.634	1.155	1.161	0.863	0.19	1.216	0.858	0.236	1.076	1.551	2.206	1.306	0.821	0.475	0.19	0.418	0.989103141	0.19
2243	837.2414941	425.1194812	427.1258658	191.0611612	2.006384646	5535.882353	1	1	1.071	1.08	0.767	0.645	0.836	0.927	0.979	0.89	0.907	0.788	0.842	0.784	1.109	1.382	0.849	0.935	0.745	0.688	1.002	0.95	0.798	0.744	0.824	0.726	0.916	0.988	0.771	0.737	0.485	0.474	0.953	1.202	1.158	1.208	0.836	0.681	0.659	0.573	0.863	0.916	0.592
2245	837.4123084	496.1894485	498.1961383	262.1311285	2.006689805	17921.71028	1	1	0.82	0.664	0.647	0.562	0.722	0.564	0.586	0.511	0.563	0.586	0.987	0.874	0.744	0.722	0.755	0.529	0.605	0.524	0.762	0.733	0.47	0.354	0.441	0.405	0.591	0.585	0.512	0.523	0.686	0.844	0.479	0.191	1.069	0.94	1.038	0.544	0.572	0.55	0.573	0.522	0.425
2247	838.4193234	362.0782952	364.0846928	256.0399504	2.006397632	7252.890043	2	2	0.38	0.345	0.996	1.118	0.779	0.727	0.16	0.642	0.922	0.574	0.797	0.583	0.411	0.747	0.439	0.907	1.172	1.052	0.441	0.35	0.814	0.439	0.516	0.921	0.783	0.943	0.344976168	0.369	0.360695058	0.935	0.422	0.16	1.109	0.908	0.945	0.831	0.485	0.435	0.612	0.16	0.533
2248	838.4490476	776.3301647	778.3364993	542.2718447	2.006334638	2583.047619	1	1	0.624	0.636	1.021	1.01	0.916	0.557	0.623	0.363	0.827	0.66	1.086	0.907	0.928	0.73	1.473	1.32	0.951	1.032	0.897	0.736	0.658	0.584	0.603	0.425	0.474	0.345	0.571	0.32	0.764	0.729	0.606	0.351	0.965	0.839	1.046	1.049	0.333	0.389	1.187	1.323	0.912
2249	838.538	361.0780466	363.0846103	254.0394532	2.006563706	32107.41176	2	2	0.424	0.777	0.927	1.412	0.689	1.203	0.472	0.955	0.845	0.937	0.76	0.869	0.484	1.057	0.73	1.598	0.993	1.503	0.606	1.149	0.497	0.837	0.695	1.29	0.875	1.501	0.553	0.628	0.558	0.828	0.499	0.211	1.033	1.043	0.688	0.754	0.647	0.625	0.712	0.665	0.651
2250	838.5813333	368.6003031	370.6067719	269.0839662	2.006468842	5082.666667	2	2	0.1001	0.1001	1.001	0.757	0.1001	0.1001	0.788	0.532	0.102	0.1001	0.1001	0.1001	0.1001	0.1001	0.1001	0.1001	4.108	0.1001	0.1001	0.1001	0.1001	0.1001	0.12	0.1001	0.189	0.174	0.1	0.1001	0.1	0.1001	0.1001	0.1001	0.1001	0.1001	0.1001	0.1001	5.705	3.286	9.99	9.99	3.47
2251	838.8475208	335.1115493	337.1183206	202.1064586	2.006771272	7889	2	2	0.557	0.24	0.459	0.159	0.152	0.217	0.253	0.252	0.141	0.164	0.149	0.586	0.211	0.284	0.211	0.234	0.165	0.211	0.156	0.257	0.1	0.1	0.143	0.147	0.195	0.256	0.102	0.1	0.122	0.198	0.113	0.428	0.33	0.399	0.239	0.158	0.197	0.263	0.264	0.447	0.206
2253	839.0861774	368.0985264	370.1052938	268.0804128	2.006767399	14168.87097	2	2	0.628062579	0.1001	0.844	0.777	0.1	0.1001	0.613	0.595	0.1	0.1	0.1	0.1	0.1	0.1	0.1	0.1	3.983	0.178903933	0.1	0.1001	0.1	0.1	0.1	0.1	0.158	0.135	0.1	0.1	0.1	0.1	0.1001	0.1	0.1	0.1001	0.1	0.1001	4.241	4.76	8.637	9.071	3.238
2255	839.297	342.6270427	344.6341627	217.1374454	2.007120019	1526	2	2	1.443	1.169	0.848	0.777	0.967335108	0.826	1.16242944	0.803	1.602	1.016	0.441	0.484	0.902	0.752	0.460392717	0.376	4.01	0.565	0.66826523	0.768	0.614808166	0.374	0.324	0.352	0.541444697	0.577	0.395937659	0.732	0.337097707	0.429	0.99	0.418043102	0.383	1.152036459	0.784957556	0.536	1.637	1.472869967	0.625	0.63580821	0.437
2256	839.8229286	382.0708082	384.0774264	148.0124882	2.006618209	11227.57143	1	1	0.539	0.684	0.568	0.544	0.66	0.504	0.472	0.418	0.539	0.492	0.505	0.414	0.748	0.612	0.62	0.616	0.622	0.645	0.659	0.607	0.953	0.856	1.011	0.888	0.769	0.793	0.53	0.715	1.824	2.249	0.527	0.585	0.526	0.535	0.44	0.586	0.498	0.488	0.837	0.816	0.487
2257	840.3072785	548.1841939	550.1907144	314.1258739	2.006520561	4216.227848	1	1	0.467	0.555	0.831	0.51	0.767	0.601	0.458	0.392	0.527	0.367	0.657	0.576	0.532	0.449	0.377	0.571	0.652	0.717	0.279	0.58	0.58	0.58	0.58	0.58	0.695	0.824	0.31	0.383	0.581	0.579	0.53	0.255	0.583	0.915	0.502	0.64	0.373	0.590435484	0.719	0.590435484	0.549
2261	842.303	368.0980787	370.105421	134.0397587	2.007342308	7546	1	1	0.628062579	0.1001	0.844	0.768	0.1	0.1001	0.613	0.639	0.1	0.1	0.1	0.1	0.1	0.1	0.1	0.1001	3.356	0.178903933	0.1	0.1001	0.1	0.1001	0.1	0.1	0.158	0.135	0.1	0.1	0.1	0.1	0.1001	0.1	0.1	0.1001	0.1	0.1001	4.241	4.76	8.23	9.071	2.808
2262	842.312	369.1065093	371.1104012	270.0963785	2.003891928	2168	2	2	0.79	1.543	0.807	0.54467746	0.815	0.48	0.696	0.608580325	0.908	0.48	0.752	0.61031807	0.704	0.830111458	0.795	0.48	0.753	0.48	0.723	0.70660058	1.033	0.82603272	0.993	0.48	0.795	0.6	0.592	0.48	0.539	0.576	0.626	1.222987516	0.781	0.717	0.676	0.778	0.418	0.442	0.813	0.74	0.457
2266	845.3313333	336.1137009	338.1203592	204.1107617	2.006658299	13672.46875	2	2	0.969	0.967	0.649	0.569	0.517	0.474	0.491	0.457	0.873	0.856	0.667	0.601	0.758	0.733	0.566	0.496	0.871	0.451	0.375	0.341	0.581	0.581	0.806	0.679	0.579	0.587	1.163	1.256	0.819	0.938	0.618	0.326	0.699	0.771	0.844	0.451	0.85	0.94	0.661	0.584	0.703
2269	847.2594974	414.1225618	416.1290846	180.0642418	2.006522782	123827.7354	1	1	0.118	0.123	0.14	0.129	0.452	0.311	0.905	0.734	0.574	0.482	0.488	0.402	0.186	0.141	0.936	0.699	0.744	0.908	1.057	0.999	0.576	0.487	1.185	0.894	2.163	2.078	1.291	1.421	0.1	0.1	0.202	0.204	0.1	0.1	0.1	0.278	0.176	0.177	0.156	0.157	0.1
2270	847.5646829	516.0581521	518.0612788	281.9998321	2.0031267	8264.019512	1	1	0.635	0.648	0.61	0.576	0.701	0.559	0.718	0.624	0.537	0.55	0.651	0.592	0.738	0.603	0.763	0.745	0.784	0.719	0.786	0.803	0.856	0.952	0.776	0.701	0.85	0.82	0.716	0.738	0.339	0.383	0.589	0.273	0.531	0.601	0.628	0.605	0.419	0.466	0.88	0.861	0.502
2273	848.5552727	786.261787	788.2680873	552.203467	2.006300232	5283.090909	1	1	0.39	0.432	0.55	0.522	0.752	0.526	1.822	1.356	1.037	0.889	2.213	2.118	0.399	0.352	1.863	1.728	0.979	1.948	1.312	1.343	1.047	0.979	1.409	1.353	2.072	1.824	1.443	1.543	0.228	0.231	0.449	0.486	0.487	0.474	0.477	0.717	1.7	1.739	0.568	0.599	0.372
2275	848.8285	372.089517	374.0961699	138.031197	2.006652975	5533.357143	1	1	0.365	0.486	0.188	0.164	0.235	0.358	0.172	0.22	0.574	0.379	0.165	0.13	0.334	0.5	0.643	0.579	0.191	0.621	0.21	0.274	0.587	0.682	0.678	0.575	0.606	0.939	0.326	0.404	0.212	0.477	0.281	0.563	0.46	0.387	0.154	0.371	0.411	0.371	0.302	0.277	0.195
2277	848.8476167	518.0579663	520.0606087	283.9996463	2.002642423	5238.5	1	1	1.072	1.101	1.029	1.165	1.155	1.113	1.08	1.131	1.084	1.1	1.252	1.115	1.099	1.102	1.424	1.289	1.305	1.178	1.298	1.309	1.34	1.248	1.269	1.188	1.599	1.541	1.214	1.308	1.018	0.857	1.077	1.064	1.225	1.029	1.041	1.113	1.149	1.094	1.711	1.687	1.178
2278	849.2915	306.6180942	308.625012	145.1195484	2.006917838	2046.5	2	2	0.915	1.621	0.894	2.138	0.68	0.838	0.943	0.86	0.621	0.591	0.775	0.627	0.692	0.778	0.951	0.986	0.693	0.616	1.03	1.071	0.703	0.523	0.592	0.436	0.664	1.107	0.561	0.722	0.551	0.62	0.507	0.608	1.093	1.051	0.724	0.425	0.848	0.47	0.934	0.47	0.563
2279	849.568	784.2550889	786.2618172	550.1967689	2.006728376	10316	1	1	0.13	0.114	0.141	0.118	0.149	0.155	0.517	0.451	0.254	0.252	0.385	0.374	0.171	0.1001	0.512	0.392	0.19	0.483	0.277	0.268	0.27	0.23	0.312	0.244	0.348	0.39	0.231	0.313	0.1001	0.1001	0.132	0.163	0.1001	0.1001	0.1001	0.169	0.165	0.168	0.179	0.1001	0.1001
2280	849.575	682.2106865	684.221855	448.1523665	2.011168477	1812	1	1	0.588	0.26	0.452	0.473	0.577	0.26	0.26	0.26	0.26	0.471	0.578	0.498715202	0.673	0.423	0.533	0.399	0.26	0.26	0.26	0.56925804	0.524	0.392	0.597	0.26	0.649	0.26	0.466	0.451098008	0.703	0.599	0.26	0.26	0.36621763	0.26	0.831	0.573	0.26	0.56925804	0.26	0.56925804	0.26
2281	849.7483611	355.1090256	357.116106	242.1014112	2.00708045	3447.777778	2	2	0.511	0.764	1.349	1.177	0.406	1.051206319	0.501	0.664	0.622	0.377523204	0.325	0.855672819	0.776	0.557	0.476	0.360799894	0.421	0.555748927	0.506	0.85	0.599	0.803	0.655	0.58	0.639	0.662	0.58	0.58	0.621	0.445	0.58	0.58	1.368	1.36	1.082	0.547	0.47	1.05	1.217	1.02	0.377
2282	849.7878333	680.2098547	684.2227175	213.1005147	4.012862783	1914.333333	1	2	2.701	0.873	2.584	2.981	3.779	0.878	0.922	0.691	0.738	2.369	4.335	2.255	4.707	1.244	3.596	1.289	0.649	0.77	1.319	2.395005053	2.547	2.377	2.74	1.726	3.147	0.815	2.83	2.32	4.759	3.691	0.414	0.818	2.031	1.440180555	5.143	3.763	0.67	2.395005053	0.348	2.395005053	0.67
2284	850.0976195	393.1474105	395.1539659	159.0890905	2.006555423	11494.8	1	1	0.75	0.824	0.617	0.572	0.785	0.659	0.953	0.804	0.755	0.732	0.933	0.834	0.843	0.591	0.922	1.004	0.974	0.551	0.849	0.838	0.738	0.817	0.603	0.411	0.676	0.79	0.452	0.579	0.624	0.735	0.74	0.957	0.832	0.804	0.699	0.616	0.491	0.523	0.779	0.779	0.52
2285	850.525	850.3076629	852.3140491	616.2493429	2.006386207	2813.5	1	1	0.227	0.136	0.18	0.18	0.529	0.398	0.896	0.682	0.661	0.554	0.618	0.373	0.218	0.18	0.925	0.676	0.772	0.869	0.95	1.141	0.685	0.441	1.033	0.962	1.602	1.547	1.036	0.995	0.18	0.18	0.18	0.25	0.18	0.18	0.18	0.394	0.185	0.301	0.231	0.18	0.18
2288	851.662	474.0677855	476.0742153	240.0094655	2.006429862	224201.973	1	1	0.541	0.7	0.563	0.572	0.642	0.57	0.548	0.548	0.616	0.562	0.569	0.523	0.744	0.757	0.636	0.619	0.738	0.722	0.716	0.706	0.922	0.879	0.923	0.839	0.802	0.753	0.665	0.647	0.552	0.617	0.514	0.562	0.536	0.533	0.52	0.589	0.333	0.305	0.602	0.636	0.499
2290	852.0795	771.1769698	773.1831954	537.1186498	2.006225575	1950.5	1	1	0.629	0.523	0.711	0.539	1.2	0.706	1.552	1.128	1.418	0.964	1.058	0.87	0.921	0.813	1.626	1.278	1.125	1.527	1.692	1.46	1.469	1.015	1.684	1.427	2.154	2.265	1.571	1.96	1.646	1.419	1.246	1.276	0.535	0.444	0.565	0.914	0.728	0.428	1.327	1.206	0.623
2291	853.1155	785.3447187	787.3509776	551.2863987	2.006258832	2495	1	1	0.342	0.37	0.45	0.392	0.325	0.286	1.134	0.868	0.49	0.434	1.691	1.931	0.339	0.227	1.158	1	0.341	1.063	0.441	0.385	0.56	0.564	0.408	0.399	0.523	0.47	0.323	0.387	0.176	0.224	0.439	0.38	0.531	0.527	0.451	0.488	1.59	1.55	0.433	0.426	0.403
2293	854.11175	496.0469236	498.0535315	261.9886036	2.006607907	10782.5	1	1	0.563	0.687	0.597	0.6	0.652	0.576	0.559	0.569	0.614	0.595	0.55	0.554	0.73	0.813	0.659	0.669	0.754	0.756	0.739	0.711	0.919	0.917	0.896	0.823	0.794	0.838	0.661	0.631	0.561	0.639	0.53	0.558	0.549	0.575	0.502	0.574	0.345	0.372	0.606	0.642	0.5
2294	854.3237778	770.2601267	772.2667597	536.2018067	2.006633006	3025.555556	1	1	0.532	0.371	0.577	0.284	0.841	0.41	0.598	0.326	0.94	0.472	0.676	0.415	0.807	0.601	0.713	0.552	0.642	0.523	0.916	0.685	1.034	0.572	0.828	0.615	0.801	0.668	0.663	0.746	1.625	1.401	0.776	1.104	0.539	0.559	0.592	0.511	0.472	0.55	1.042	1.158	0.778
2295	854.8037251	334.0738904	336.080459	100.0155704	2.006568619	42365.45024	1	1	0.498	0.354	0.555	0.319	0.705	0.461	0.767	0.402	1.078	0.511	0.776	0.48	0.815	0.707	0.771	0.543	0.624	0.608	0.887	0.565	1.237	0.769	0.939	0.633	0.855	0.738	0.693	0.809	1.803	1.909	0.893	1.29	0.488	0.48	0.567	0.646	0.494	0.516	1.163	1.275	0.756
2298	855.4894091	774.3149686	776.3213655	540.2566486	2.006396878	2490.090909	1	1	0.594	0.537	0.857	0.523	0.923	0.706	0.767	0.508	0.903	0.774	1.015	0.706	1.057	0.865	1.172	1.001	0.652	1.08	0.748	0.497	1.151	0.96	1.174	0.783	0.38	0.279	0.619	0.678	0.909	0.84	0.856	0.731	0.759	0.883	0.941	0.99	0.485	0.533	0.921	0.804	0.59
2300	856.04248	478.2371332	480.2433638	244.1788132	2.006230577	3197.84	1	1	0.64	0.524	1.014	0.932	0.557	0.435	0.434	0.464	0.476	0.513	0.612	0.782	0.93	0.468	0.765	0.733	0.75	0.596	0.671	0.825	0.984	1.58	0.999	1.635	0.909	0.69	0.352	0.416	0.422	0.579	0.368	0.125	0.353	0.376	0.382	0.6	0.645	0.698	1.07	0.96	0.631
2304	857.1351138	370.0563438	372.0628464	271.9960476	2.006502562	4950.700066	2	2	1.442	0.628	1.564	0.823	1.496	0.535	1.072	0.573	1.78	0.658	1.195	0.752	0.816	0.549	1.572	0.92	1.528	1.038	1.167	0.637	0.824	0.859	0.832	0.82	1.416	1.032	1.606	0.993	1.694	1.015	0.949	0.243	0.746	0.849	1.082	2.01	1.766	1.97	1.79	1.674	1.839
2305	857.4014605	378.1000725	380.1065731	144.0417525	2.006500614	37406.20465	1	1	0.627	0.632	0.681	0.6	0.833	0.566	0.621	0.456	0.676	0.536	0.762	0.531	0.891	0.758	0.821	0.619	0.782	0.757	0.813	0.692	1.203	0.915	1.171	0.98	0.943	0.893	0.696	0.855	2.21	2.5	0.664	1.232	0.688	0.679	0.562	0.662	0.679	0.68	1.02	0.967	0.621
2307	857.795	340.6078517	342.612138	213.0990634	2.004286346	3734	2	2	1.7	1.663292159	1.873	1.468	2.103	1.073	1.344	1.094240948	0.64	1.909	1.477	2.15	2.516	1.073	0.961	1.034	0.382	0.935	1.333	0.1001	0.436	1.367	0.848	1.47	1.703	1.295	0.8	0.994	2.127	1.608	0.358	0.251	2.278	1.738	2.076	0.959	0.141	0.1001	0.188	0.881	0.135
2315	858.808	370.0560203	372.0623648	135.9977003	2.006344566	3784	1	1	1.442	0.642	1.564	0.823	1.496	0.56	1.072	0.61	1.758	0.676	1.195	0.787	0.816	0.601	1.572	0.839	1.528	1.032	1.167	0.502	0.824	0.819	0.83	0.815	1.416	1.032	1.606	0.993	1.694	1.015	0.949	0.243	0.746	0.849	1.088	2.01	1.766	1.97	1.79	1.674	1.839
2316	858.81	340.1036853	342.1104185	106.0453653	2.006733193	10528	1	1	1.401	1.688	1.626	1.602	1.6	1.259	1.533	1.175	0.564	0.403	1.135	0.829	1.876	2.093	0.508	0.421	0.151	1.22	1.507	1.83	0.261	0.295	0.708	0.644	1.612	1.645	0.474	0.453	1.528	1.338	0.344	0.203	1.979	1.773	1.654	0.609	0.106	0.277	0.176	0.264	0.135
2317	859.4987159	349.1575795	351.1642502	115.0992595	2.006670686	59853.93182	1	1	0.276	0.331	0.399	0.396	0.266	0.223	1.298	1.092	0.491	0.437	2.193	1.954	0.217	0.206	1.294	1.212	0.279	1.236	0.391	0.405	0.542	0.523	0.4	0.327	0.427	0.479	0.293	0.373	0.136	0.162	0.238	0.314	0.472	0.482	0.461	0.432	1.903	1.908	0.398	0.388	0.347
2318	859.5628	340.1039496	342.1106556	212.0912593	2.006705941	13442.66667	2	2	1.401	1.764	1.588	1.636	1.6	1.151	1.533	0.997	0.564	0.565	1.113	0.93	1.812	1.403	0.508	0.401	0.151	1.172	1.507	1.496	0.261	0.322	0.708	0.665	1.507	1.734	0.474	0.453	1.528	1.338	0.344	0.203	1.979	1.773	1.654	0.609	0.106	0.277	0.176	0.264	0.135
2320	859.7840885	446.1488718	448.1551417	212.0905518	2.006269881	6859.380531	1	1	1.517	1.481	1.66	1.529	1.716	1.477	1.338	1.048	0.577	0.432	1.099	0.993	1.933	2.008	0.535	0.422	0.174	1.322	1.431	1.961	0.314	0.413	0.754	0.711	1.636	1.603	0.477	0.486	1.382	1.474	0.429	0.264	1.73	1.818	1.563	0.556	0.17	0.15	0.237	0.15	0.18
2321	859.834	367.1668641	369.1752172	133.1085441	2.008353078	5554	1	1	0.322	0.334414845	0.428	0.435	0.343	0.259825693	1.296	1.027	0.537	0.470310702	2.261	1.953	0.271	0.213674881	1.279	1.133	0.332	1.124	0.431	0.387599992	0.603	0.492076241	0.431	0.293	0.447	0.503	0.323	0.36726363	0.206	0.236	0.295	0.314	0.507	0.493	0.497	0.485	1.93	1.899	0.427	0.44	0.395
2324	861.06325	389.1223596	391.1323058	155.0640396	2.009946159	4468.5	1	1	0.799	1.491	0.791	1.497	0.817	1.803	0.877	0.892	0.828	1.717	0.855	2.123	1.092	2.331	1.066	3.463	0.854	2.112	1.141	2.46	1.081	3.806735826	1.166	2.924	1.33	3.25	1.462	3.33	1.211	2.019	1.362	1.681	1.368	9.99	1.657	1.054	0.696	9.49	0.699	9.66	0.846
2327	861.4065	367.1643269	369.1726905	133.1060069	2.008363508	3994	1	1	0.661	0.33	0.608	0.41	0.641	0.257	1.296	1.11	0.72	0.435	2.368	1.836	0.759	0.255	1.15	1.161	0.82	1.198	0.685	0.397	0.71	0.496	0.477	0.325	0.509	0.511	0.679	0.39	0.518	0.479	0.477	0.561	0.598	0.724	0.55	0.653	1.902	2.039	0.47	0.729	0.626
2328	861.6093535	329.1239819	331.130649	190.1313239	2.006667033	37293.64651	2	2	0.581	0.609	0.638	0.668	0.616	0.526	0.453	0.416	0.537	0.47	0.555	0.479	0.621	0.628	1.006	0.992	0.645	0.558	0.759	0.81	1.042	1.082	0.944	0.862	0.711	0.738	0.729	0.906	0.252	0.316	0.951	0.286	0.532	0.567	0.475	0.348	0.61	0.584	0.873	0.848	0.59
2330	862.2012381	369.1007692	371.1066208	135.0424492	2.005851557	5476.380952	1	1	0.568	0.405	0.733	0.427	0.943	0.719	0.858	0.696	0.762	0.704	0.767	0.548	0.756	0.626	0.906	0.704	0.8	0.722	0.905	0.719	0.806	0.696	0.777	0.567	0.813	0.852	0.545	0.625	0.709	0.781	0.609	1.097	0.661	0.74	0.787	0.751	0.472	0.307	0.799	0.854	1.524
2331	862.331	330.1240998	332.1306208	192.1315596	2.006520998	3769.272727	2	2	0.785	1.047	0.755	1.011	0.712	0.715	0.683	0.612	0.638	0.719	0.677	0.732	0.809	0.873	1.06	0.978	0.775	0.756	1.012	1.034	1.188	1.367	1.09	1.093	0.693	0.939	0.949	1.039	0.351	0.432	0.971	0.627	0.832	0.628	0.652	0.641	0.701	0.698	1.239	0.822	0.756
2332	862.5211806	622.1783597	626.1918706	155.0690197	4.01351087	5265.361111	1	2	0.734	1.172	0.58	0.698	0.487	0.863	0.415	0.73	0.511	0.3	0.47	0.3	0.581	0.3	0.471	0.3	0.348	0.625398548	0.503	0.3	0.541	0.3	0.846	0.3	0.89	0.625398548	0.637	5.05	0.38	0.3	0.548	0.3	0.794	0.625398548	0.34	0.3	0.659	0.625398548	0.752	0.625398548	0.482
2333	862.6170079	389.1262039	391.1341336	155.0678839	2.007929652	21769.28571	1	1	0.776	1.233716991	0.787	1.141666083	0.682	0.55	0.547	3.5	0.647	9.45637829	0.648	0.55	0.716	0.55	0.76	0.55	0.742	0.55	0.978	1.92	0.874	0.55	0.825	0.55	0.972	0.55	0.945	0.55	0.557	2.937191754	0.653	1.925426143	0.743	3.43	0.864	0.876	0.634	1.38	0.71	1.64	0.545
2334	862.71305	342.6291115	344.6359319	217.1415829	2.006820473	3760.5	2	2	1.025	0.639	0.675	0.84	0.866	0.894	1.092	0.802	1.097	0.676	0.608	0.659	0.913	0.891	0.456	0.339	0.782	0.554	0.652	0.68	0.533	0.439	0.37	0.352	0.548	0.666	0.353	0.73	0.366	0.577	0.481	0.413	1.11	1.14	0.811	0.518	1.683	0.41	0.38	0.567	0.45
2335	863.919	342.6283646	344.6347717	108.5700446	2.00640709	3750	1	1	0.672	1.041	0.647	0.777	0.851	0.851	1.101	0.803	0.982	0.903	0.676	0.638	0.731	0.845	0.375	0.339	0.804	0.582	0.635	0.72	0.56	0.374	0.37	0.352	0.548	0.636	0.353	0.73	0.418	0.597	0.508	0.413	1.078	1.155	0.811	0.533	0.778	0.41	0.385	0.567	0.463
2336	864.974	324.5923429	326.5989245	181.0680459	2.006581565	4170	2	2	0.459	0.183918406	0.389	0.146	0.439	0.168	0.313	0.134	0.424	0.245853714	0.407	0.23384016	0.518	0.203	0.424	0.147	0.27	0.17	0.485	0.176	0.564	0.174	0.645	0.166	0.476	0.249	0.382	0.225	1.403	0.96	0.384	2.162	0.257	0.173	0.438	0.484	0.289	0.173	0.197	0.225	0.256
2337	865.1115	329.1235445	331.1302152	95.06522454	2.006670662	6083	1	1	0.581	0.659	0.637	0.66	0.616	0.53	0.453	0.427	0.537	0.467	0.555	0.468	0.621	0.61	1.006	0.97	0.645	0.548	0.758	0.802	1.058	1.011	0.949	0.841	0.723	0.751	0.729	0.976	0.252	0.316	0.951	0.286	0.532	0.567	0.475	0.348	0.619	0.584	0.873	0.848	0.605
2339	866.02	422.0816712	424.0860419	188.0233512	2.004370688	4031.418182	1	1	1.001	9.99	1.34	9.99	2.155	1.264	1.703	0.719	1.664	1.357	2.36	0.836	2.672	1.114	2.622	1.326	1.598	1.25	2.517	1.002	1.339	0.962	1.436	1.111	1.612	0.724	1.53	1.583	1.196	0.985	0.893	0.66	2.563	3.215	1.344	1.228	1.606	1.288	2.493	1.892	1.389
2341	868.0258333	528.1255138	532.1381076	61.01617384	4.012593727	2732	1	2	2.294	2.833	2.147	1.582	2.756	2.12	2.601	1.765	2.228	1.876	2.003	1.588	3.121	2.949	1.764	1.844	1.708	2.26	1.946	2.047	2.228	2.163	3.471	3.551	1.952	2.531	2.049	2.352	1.533	1.67	3.007	2.727	3.069	3.153	2.501	1.844	1.994	1.66	2.239	2.605	1.285
2343	868.1052092	317.1316781	319.1380772	83.07335811	2.006399114	6537.727203	1	1	0.853	0.792	0.926	0.805	0.874	0.79	0.958	0.715	0.941	0.763	0.886	0.831	0.931	0.826	0.886	0.811	0.865	0.771	0.854	0.753	0.942	0.909	0.889	0.782	0.879	0.812	0.854	0.867	0.803	0.753	0.804	0.812	0.834	0.788	0.824	0.825	0.796	0.788	0.872	0.795	0.821
2344	869.03	354.0704025	356.0770173	240.0241649	2.00661489	1968	2	2	0.317	0.411	0.538	0.64	0.536	0.545	0.503	0.373	0.464	0.369	0.476	0.325	0.47	0.361	0.535	0.427	0.704	0.589	0.526	1.264	0.398	0.641	0.471	0.491	0.59	0.58	0.717	0.512	0.439	0.725	0.534	0.384	0.655	0.785	0.462	0.542	0.598	0.753	0.567	0.831	0.546
2346	869.577629	534.2048721	536.2114742	300.1465521	2.00660216	5652.516129	1	1	0.722	0.87	0.745	0.721	0.612	0.726	0.559	0.518	0.767	0.589	0.629	0.633	0.615	0.682	0.662	0.71	0.661	0.76	0.618	0.644	0.682	0.772	0.645	0.687	0.622	0.714	0.743	0.688	0.673	0.712	0.637	0.765	0.597	0.722	0.603	0.701	0.575	0.61	0.78	0.61	0.656
2348	870.4426667	288.1051517	290.1121041	54.04683173	2.006952381	4376.666667	1	1	0.868	0.84	0.68	0.613	0.872	0.794	0.982	0.74	0.665	0.607	0.878	0.926	0.892	1.074	0.711	0.712	0.699	0.566	0.769	0.899	0.601	0.446	0.698	0.62	0.723	0.845	0.425	0.705	0.659	0.88	0.968	1.169	0.766	0.868	0.72	0.581	0.501	0.474	0.705	0.672	0.527
2351	871.044	672.8140341	674.8203675	877.5114282	2.006333342	2228	2	2	0.941	1.349	1.946	1.81	1.403	1.239	1	0.798	1.799	1.148	1.268	1.231	0.984	1.106	1.195	1.528	1.094	1.537	1.456	0.62	1.549	1.489	2.055	1.511	1.323	1.776	1.513	1.737	0.42	0.757	0.86	1.751	1.085	0.12	1.134	0.995	1.157	1.074554945	1.838	1.074554945	1.688
2352	871.149	325.089751	327.0963664	182.0628619	2.006615447	6426.666667	2	2	0.571	0.134	0.449	0.203	0.516	0.261	0.392	0.196	0.352	0.305	0.473	0.281	0.671	0.255	0.473	0.306	0.259	0.223	0.278	0.234	0.447	0.335	0.597	0.357	0.532	0.332	0.434	0.299	1.177	0.838	0.334	2.084	0.174	0.251	0.471	0.48	0.164	0.152	0.254	0.36	0.104
2354	871.9554004	324.0898382	326.0965067	180.0630365	2.006668483	57392.08341	2	2	0.424	0.1	0.362	0.115	0.348	0.186	0.321	0.162	0.359	0.29	0.425	0.238	0.487	0.22	0.296	0.182	0.175	0.176	0.223	0.225	0.473	0.296	0.674	0.247	0.416	0.243	0.361	0.276	1.151	0.952	0.298	1.92	0.209	0.125	0.385	0.453	0.142	0.146	0.3	0.194	0.103
2358	872.2243721	393.1474055	395.153967	159.0890855	2.006561557	140341.0233	1	1	0.736	0.832	0.665	0.559	0.883	0.765	0.953	0.685	0.755	0.61	0.94	0.854	0.992	1.039	0.765	0.678	0.64	0.519	0.832	0.771	0.567	0.459	0.618	0.607	0.669	0.839	0.481	0.669	0.62	0.739	0.754	0.976	0.816	0.785	0.669	0.602	0.476	0.519	0.735	0.754	0.479
2359	872.5397353	478.236598	480.2431578	244.178278	2.006559801	111097.1471	1	1	0.726	0.909	1.152	1.338	0.628	0.545	0.406	0.44	0.461	0.404	0.6	0.491	1.018	1.08	0.76	0.729	0.509	0.328	0.649	0.741	0.1	0.1	0.133	0.12	1.056	1.34	0.407	0.495	0.412	0.589	0.328	0.125	0.352	0.356	0.283	0.639	0.626	0.641	0.917	0.957	0.457
2360	872.582	648.1752836	652.188087	181.0659436	4.012803462	3480	1	2	0.445	0.147	0.457	0.184	0.498	0.251	0.418	0.17	0.423	0.374	0.496	0.288	0.575	0.283	0.455	0.242	0.28	0.22	0.311	0.231	0.557	0.411	0.749	0.364	0.645	0.358	0.541	0.381	1.307	1.037	0.351	1.909	0.228	0.197	0.543	0.599	0.44	0.51478712	0.207	0.619770068	0.138
[truncated: 2,414 more rows]
[truncated: 171 more columns]
